# Supplementary material for: RNA Sequencing Analysis of the Gametophyte Transcriptome from the Liverwort, Marchantia polymorpha
Source: PLoS One. 2014 May 19;9(5):e97497. doi: 10.1371/journal.pone.0097497 (PMC4026138; doi:10.1371/journal.pone.0097497)
Supplement: Table S10 — Assignment of OrthoMCL groups to M. polymorpha transcripts. A table showing the top hits of BLASTX results of 20,072 Marchantia transcripts against OrthoMCL clusters. (XLSX) [file pone.0097497.s014.xlsx]

## Sheet: Sheet1
Assignment of OrthoMCL groups to Marchantia transcripts.
query	query_len	sbjct	match_len	query_start	query_end	sbjct_start	sbjct_end	score	e-value	identities	positives
Locus_27511_Transcript_1/1_Confidence_1.000	490	aaeg|AAEL000256-PA | OG5_129842 |	520	50	172	475	515	180	9e-14	80.49	92.68
Locus_30541_Transcript_1/1_Confidence_1.000	308	aaeg|AAEL000256-PA | OG5_129842 |	520	307	2	78	179	377	7e-42	85.29	95.1
Locus_21453_Transcript_1/1_Confidence_1.000	569	aaeg|AAEL000445-PA | OG5_154942 |	152	190	516	24	132	494	5e-61	83.49	91.74
Locus_23694_Transcript_1/1_Confidence_1.000	342	aaeg|AAEL000454-PA | OG5_126870 |	396	3	296	298	395	467	2e-55	88.78	93.88
Locus_40031_Transcript_1/1_Confidence_1.000	260	aaeg|AAEL000572-PA | OG5_127399 |	723	2	259	255	340	281	3e-28	58.14	73.26
Locus_47436_Transcript_1/1_Confidence_1.000	274	aaeg|AAEL000769-PA | OG5_127971 |	247	254	9	3	77	129	3e-08	36.59	51.22
Locus_31090_Transcript_1/1_Confidence_1.000	276	aaeg|AAEL001184-PA | OG5_144047 |	441	41	274	205	281	203	6e-18	50	67.95
Locus_12932_Transcript_1/1_Confidence_1.000	569	aaeg|AAEL001539-PA | no_group |	205	489	7	54	205	185	4e-15	37.43	44.92
Locus_23725_Transcript_1/1_Confidence_1.000	950	aaeg|AAEL001668-PA | OG5_126698 |	433	7	942	57	368	1430	0	86.22	92.63
Locus_6691_Transcript_1/1_Confidence_1.000	726	aaeg|AAEL002022-PA | OG5_136338 |	127	72	437	1	122	416	6e-49	57.38	80.33
Locus_1284_Transcript_1/1_Confidence_1.000	906	aaeg|AAEL002092-PA | OG5_139073 |	170	741	451	57	152	373	3e-41	74.49	84.69
Locus_29529_Transcript_1/1_Confidence_1.000	808	aaeg|AAEL002354-PA | OG5_149320 |	766	2	808	225	493	1268	3e-168	89.22	94.8
Locus_27867_Transcript_1/1_Confidence_1.000	291	aaeg|AAEL002381-PA | no_group |	67	107	256	3	52	240	2e-25	94	94
Locus_24418_Transcript_1/1_Confidence_1.000	270	aaeg|AAEL002436-PA | OG5_131081 |	275	1	270	116	205	425	1e-50	86.67	94.44
Locus_6000_Transcript_1/1_Confidence_1.000	414	aaeg|AAEL002526-PA | OG5_131574 |	70	52	252	3	69	220	9e-22	74.63	89.55
Locus_19511_Transcript_1/1_Confidence_1.000	455	aaeg|AAEL002813-PA | OG5_132818 |	106	375	103	8	105	231	6e-23	48.48	67.68
Locus_18594_Transcript_1/1_Confidence_1.000	411	aaeg|AAEL002827-PA | OG5_127099 |	504	404	3	140	273	597	3e-73	99.25	100
Locus_4381_Transcript_1/1_Confidence_1.000	265	aaeg|AAEL002851-PA | OG5_126611 |	447	214	2	1	71	393	1e-44	100	100
Locus_29507_Transcript_1/1_Confidence_1.000	373	aaeg|AAEL002955-PA | OG5_152173 |	292	35	355	1	110	292	2e-30	54.55	69.09
Locus_18926_Transcript_1/1_Confidence_1.000	404	aaeg|AAEL002956-PA | OG5_127570 |	467	1	402	292	425	619	7e-77	84.33	92.54
Locus_25372_Transcript_1/1_Confidence_1.000	420	aaeg|AAEL002971-PA | OG5_134654 |	786	3	419	595	733	637	9e-77	83.45	89.21
Locus_25717_Transcript_1/1_Confidence_1.000	291	aaeg|AAEL003078-PA | OG5_142382 |	2290	290	3	1233	1356	118	4e-06	34.68	42.74
Locus_28138_Transcript_1/1_Confidence_1.000	363	aaeg|AAEL003078-PA | OG5_142382 |	2290	1	351	1614	1727	169	2e-12	51.64	68.03
Locus_24745_Transcript_1/1_Confidence_1.000	385	aaeg|AAEL003234-PA | OG5_129923 |	109	382	116	18	108	338	4e-39	69.23	79.12
Locus_7977_Transcript_1/1_Confidence_1.000	424	aaeg|AAEL003259-PA | OG5_162684 |	133	100	420	1	106	336	3e-38	59.81	78.5
Locus_17551_Transcript_1/1_Confidence_1.000	333	aaeg|AAEL003419-PA | OG5_139093 |	535	130	333	4	68	241	1e-22	71.01	79.71
Locus_50235_Transcript_1/1_Confidence_1.000	405	aaeg|AAEL003425-PA | OG5_139093 |	539	3	404	283	416	712	6e-90	94.78	99.25
Locus_32865_Transcript_1/1_Confidence_1.000	289	aaeg|AAEL004090-PA | OG5_131955 |	755	75	287	483	557	145	9e-10	38.96	59.74
Locus_17206_Transcript_1/1_Confidence_1.000	802	aaeg|AAEL004264-PA | OG5_168200 |	286	203	634	1	160	153	7e-10	32.72	53.7
Locus_3307_Transcript_1/1_Confidence_1.000	674	aaeg|AAEL004280-PA | OG5_146341 |	237	673	410	48	135	361	1e-39	76.14	87.5
Locus_52556_Transcript_1/1_Confidence_1.000	254	aaeg|AAEL004434-PA | OG5_126720 |	627	2	253	9	92	390	1e-43	84.52	95.24
Locus_14801_Transcript_1/1_Confidence_1.000	656	aaeg|AAEL004500-PA | OG5_126923 |	844	2	655	509	726	1109	2e-144	92.66	97.25
Locus_16249_Transcript_1/1_Confidence_1.000	561	aaeg|AAEL004500-PA | OG5_126923 |	844	1	558	327	512	967	8e-124	96.24	98.39
Locus_29878_Transcript_1/1_Confidence_1.000	505	aaeg|AAEL004829-PA | OG5_130755 |	157	8	424	13	151	447	2e-54	59.71	70.5
Locus_26263_Transcript_1/1_Confidence_1.000	276	aaeg|AAEL004897-PA | OG5_126929 |	1012	273	1	114	204	436	6e-49	87.91	94.51
Locus_10689_Transcript_1/1_Confidence_1.000	492	aaeg|AAEL004987-PA | OG5_152238 |	256	57	491	88	232	363	1e-40	44.14	65.52
Locus_25304_Transcript_1/1_Confidence_1.000	295	aaeg|AAEL005244-PA | OG5_130584 |	395	1	294	33	132	365	9e-41	65	75
Locus_25154_Transcript_1/1_Confidence_1.000	334	aaeg|AAEL005338-PA | OG5_126738 |	2679	328	194	2602	2646	131	1e-07	51.11	68.89
Locus_12530_Transcript_1/1_Confidence_1.000	270	aaeg|AAEL005435-PA | OG5_127023 |	473	82	270	1	63	144	6e-10	47.62	68.25
Locus_30307_Transcript_1/1_Confidence_1.000	318	aaeg|AAEL005435-PA | OG5_127023 |	473	1	318	181	286	453	7e-53	76.42	90.57
Locus_25966_Transcript_1/1_Confidence_1.000	306	aaeg|AAEL005667-PA | OG5_133241 |	1172	1	213	1102	1172	372	6e-40	85.92	92.96
Locus_18266_Transcript_1/1_Confidence_1.000	425	aaeg|AAEL005772-PA | OG5_168272 |	138	1	363	16	137	363	2e-42	56.1	72.36
Locus_13358_Transcript_1/1_Confidence_1.000	495	aaeg|AAEL006509-PA | OG5_132102 |	99	79	375	1	99	407	6e-49	72.73	84.85
Locus_48639_Transcript_1/1_Confidence_1.000	496	aaeg|AAEL006511-PA | OG5_128257 |	128	473	90	1	128	662	3e-87	99.22	99.22
Locus_12679_Transcript_1/1_Confidence_1.000	1491	aaeg|AAEL006582-PC | OG5_126674 |	1019	7	1491	323	817	2417	0	90.3	96.16
Locus_23411_Transcript_1/1_Confidence_1.000	452	aaeg|AAEL006824-PA | OG5_136807 |	561	11	451	367	513	691	3e-86	80.95	93.2
Locus_40619_Transcript_1/1_Confidence_1.000	338	aaeg|AAEL007054-PA | OG5_133252 |	107	310	38	1	91	270	3e-29	60.44	69.23
Locus_2611_Transcript_1/1_Confidence_1.000	1497	aaeg|AAEL007281-PA | OG5_126854 |	712	575	1495	286	590	651	4e-74	40.58	59.09
Locus_12968_Transcript_1/1_Confidence_1.000	516	aaeg|AAEL007306-PA | OG5_128602 |	896	2	514	162	332	922	6e-117	97.66	100
Locus_15941_Transcript_1/1_Confidence_1.000	574	aaeg|AAEL007306-PA | OG5_128602 |	896	287	574	27	122	507	2e-57	98.96	100
Locus_29201_Transcript_1/1_Confidence_1.000	658	aaeg|AAEL007306-PA | OG5_128602 |	896	657	505	846	896	283	2e-26	94.12	98.04
Locus_15829_Transcript_1/1_Confidence_1.000	1608	aaeg|AAEL007437-PA | OG5_208371 |	486	931	425	139	289	200	1e-14	47.95	61.4
Locus_22590_Transcript_1/1_Confidence_1.000	284	aaeg|AAEL007437-PA | OG5_208371 |	486	275	12	180	257	122	7e-07	51.14	62.5
Locus_8541_Transcript_1/1_Confidence_1.000	2160	aaeg|AAEL007442-PA | OG5_127678 |	432	897	1	16	309	162	9e-10	24.05	43.99
Locus_28849_Transcript_1/1_Confidence_1.000	576	aaeg|AAEL007483-PA | OG5_155209 |	843	225	419	503	566	120	7e-06	49.23	64.62
Locus_49490_Transcript_1/1_Confidence_1.000	260	aaeg|AAEL007681-PA | OG5_127601 |	487	45	260	1	75	160	4e-12	48.15	55.56
Locus_27779_Transcript_1/1_Confidence_1.000	288	aaeg|AAEL007949-PA | OG5_126990 |	247	287	6	144	237	303	7e-33	58.51	74.47
Locus_24466_Transcript_1/1_Confidence_1.000	521	aaeg|AAEL008167-PB | OG5_127258 |	503	521	3	111	283	728	5e-92	86.13	91.91
Locus_21117_Transcript_1/1_Confidence_1.000	606	aaeg|AAEL008188-PA | OG5_127206 |	264	605	30	73	264	482	1e-57	59.38	74.48
Locus_21516_Transcript_1/1_Confidence_1.000	779	aaeg|AAEL008307-PA | OG5_155243 |	262	714	1	17	248	739	2e-95	58.16	74.9
Locus_16186_Transcript_1/1_Confidence_1.000	314	aaeg|AAEL008328-PA | OG5_132526 |	128	309	1	19	121	304	4e-34	55.34	73.79
Locus_19184_Transcript_1/1_Confidence_1.000	424	aaeg|AAEL008345-PA | OG5_136807 |	554	423	1	226	365	412	7e-46	65.25	79.43
Locus_16415_Transcript_1/1_Confidence_1.000	467	aaeg|AAEL008490-PA | OG5_130434 |	125	365	12	1	119	337	2e-38	63.03	78.99
Locus_20936_Transcript_1/1_Confidence_1.000	308	aaeg|AAEL008848-PA | OG5_127077 |	297	307	146	241	294	249	1e-24	92.59	92.59
Locus_6227_Transcript_1/1_Confidence_1.000	355	aaeg|AAEL008969-PA | OG5_186660 |	126	1	165	34	88	198	3e-18	70.91	80
Locus_23332_Transcript_1/1_Confidence_1.000	756	aaeg|AAEL008969-PA | OG5_186660 |	126	513	274	19	98	275	6e-28	71.25	78.75
Locus_11804_Transcript_1/1_Confidence_1.000	250	aaeg|AAEL009808-PA | OG5_127301 |	246	2	244	159	239	364	4e-42	88.89	96.3
Locus_27116_Transcript_1/1_Confidence_1.000	254	aaeg|AAEL009910-PA | OG5_158748 |	624	6	194	183	245	168	5e-13	57.58	71.21
Locus_25762_Transcript_1/1_Confidence_1.000	475	aaeg|AAEL009964-PA | OG5_136022 |	82	75	305	1	77	245	4e-25	74.03	81.82
Locus_14580_Transcript_1/1_Confidence_1.000	340	aaeg|AAEL010230-PA | OG5_130262 |	146	2	340	10	122	375	2e-44	68.14	82.3
Locus_24894_Transcript_1/1_Confidence_1.000	462	aaeg|AAEL010372-PA | OG5_131202 |	1278	460	137	1162	1269	312	4e-31	50	70.37
Locus_34334_Transcript_1/1_Confidence_1.000	490	aaeg|AAEL010573-PA | OG5_126998 |	151	441	79	27	148	301	1e-32	79.51	87.7
Locus_13622_Transcript_1/1_Confidence_1.000	257	aaeg|AAEL010814-PA | OG5_128267 |	393	77	256	1	61	153	3e-11	53.97	68.25
Locus_37716_Transcript_1/1_Confidence_1.000	256	aaeg|AAEL010843-PA | OG5_127384 |	110	81	254	1	58	288	3e-32	94.83	100
Locus_17000_Transcript_1/1_Confidence_1.000	439	aaeg|AAEL011070-PA | OG5_155332 |	236	193	438	1	90	277	2e-28	56.67	72.22
Locus_19021_Transcript_1/1_Confidence_1.000	331	aaeg|AAEL011070-PA | OG5_155332 |	236	331	182	187	236	250	6e-25	90	98
Locus_68384_Transcript_1/1_Confidence_1.000	256	aaeg|AAEL011145-PA | OG5_128437 |	1037	30	179	487	536	128	1e-07	46	64
Locus_49271_Transcript_1/1_Confidence_1.000	323	aaeg|AAEL011381-PA | OG5_127839 |	468	1	321	296	402	560	2e-68	94.39	98.13
Locus_28315_Transcript_1/1_Confidence_1.000	440	aaeg|AAEL011478-PA | OG5_127498 |	128	160	438	36	128	471	1e-58	92.47	96.77
Locus_28125_Transcript_1/1_Confidence_1.000	401	aaeg|AAEL011491-PA | no_group |	184	13	339	69	177	169	2e-13	28.18	50
Locus_31662_Transcript_1/1_Confidence_1.000	431	aaeg|AAEL011683-PA | no_group |	68	3	158	17	68	208	6e-20	71.15	86.54
Locus_29891_Transcript_1/1_Confidence_1.000	315	aaeg|AAEL012062-PA | OG5_127003 |	1001	2	313	449	552	442	1e-49	87.5	95.19
Locus_22662_Transcript_1/1_Confidence_1.000	258	aaeg|AAEL012090-PA | OG5_155372 |	564	258	4	404	479	124	4e-07	51.76	60
Locus_42603_Transcript_1/1_Confidence_1.000	249	aaeg|AAEL012090-PA | OG5_155372 |	564	27	248	78	150	178	2e-14	54.05	66.22
Locus_10343_Transcript_1/1_Confidence_1.000	460	aaeg|AAEL012207-PD | OG5_146563 |	159	437	3	1	145	494	1e-61	71.72	86.21
Locus_18071_Transcript_1/1_Confidence_1.000	307	aaeg|AAEL012245-PA | OG5_158837 |	234	305	54	142	226	349	1e-39	75.29	85.88
Locus_38835_Transcript_1/1_Confidence_1.000	278	aaeg|AAEL012576-PA | OG5_126685 |	519	152	3	1	49	157	1e-11	64	78
Locus_7353_Transcript_1/1_Confidence_1.000	1123	aaeg|AAEL012740-PA | OG5_126818 |	138	1036	680	1	121	361	3e-39	89.26	95.04
Locus_18787_Transcript_1/1_Confidence_1.000	490	aaeg|AAEL012897-PA | OG5_126691 |	788	258	1	19	104	315	1e-31	71.26	82.76
Locus_22599_Transcript_1/1_Confidence_1.000	824	aaeg|AAEL012897-PA | OG5_126691 |	788	3	824	381	654	1304	3e-173	86.13	92.34
Locus_37635_Transcript_1/1_Confidence_1.000	403	aaeg|AAEL012944-PB | OG5_126688 |	183	50	403	6	123	571	3e-73	90.68	97.46
Locus_11980_Transcript_1/1_Confidence_1.000	284	aaeg|AAEL013327-PA | OG5_168658 |	246	3	248	165	246	267	1e-27	63.41	80.49
Locus_15452_Transcript_1/1_Confidence_1.000	352	aaeg|AAEL013327-PA | OG5_168658 |	246	350	30	140	246	333	5e-37	57.01	78.5
Locus_24980_Transcript_1/1_Confidence_1.000	480	aaeg|AAEL013327-PA | OG5_168658 |	246	429	4	24	165	577	8e-73	71.13	86.62
Locus_21933_Transcript_1/1_Confidence_1.000	728	aaeg|AAEL013353-PA | OG5_127737 |	126	30	407	1	126	454	1e-54	75.4	87.3
Locus_10850_Transcript_1/1_Confidence_1.000	537	aaeg|AAEL013694-PA | OG5_127014 |	288	535	5	5	181	748	8e-98	82.49	90.4
Locus_6452_Transcript_1/1_Confidence_1.000	563	aaeg|AAEL014302-PA | OG5_155441 |	502	12	563	100	283	711	3e-89	69.57	83.15
Locus_25610_Transcript_1/1_Confidence_1.000	463	aaeg|AAEL014302-PA | OG5_155441 |	502	6	341	388	499	292	2e-29	50.89	68.75
Locus_28765_Transcript_1/1_Confidence_1.000	291	aaeg|AAEL014302-PA | OG5_155441 |	502	289	2	269	364	362	8e-40	64.58	76.04
Locus_15548_Transcript_1/1_Confidence_1.000	520	aaeg|AAEL014419-PA | OG5_168172 |	126	299	39	26	112	359	2e-41	78.16	85.06
Locus_3359_Transcript_1/1_Confidence_1.000	378	aaeg|AAEL014490-PA | OG5_175488 |	167	13	162	114	167	197	1e-17	75.93	79.63
Locus_26830_Transcript_1/1_Confidence_1.000	379	aaeg|AAEL014555-PA | OG5_131261 |	163	340	8	30	141	334	8e-38	55.36	72.32
Locus_39500_Transcript_1/1_Confidence_1.000	367	aaeg|AAEL014668-PA | OG5_126566 |	865	346	5	447	556	141	6e-09	31.58	55.26
Locus_62293_Transcript_1/1_Confidence_1.000	303	aaeg|AAEL014741-PA | OG5_155451 |	209	10	300	42	133	165	3e-13	37.11	58.76
Locus_712_Transcript_1/1_Confidence_1.000	4765	aaeg|AAEL014742-PA | OG5_126566 |	789	931	2406	242	742	299	2e-25	26.64	45.17
Locus_5314_Transcript_1/2_Confidence_1.000	470	aaeg|AAEL014742-PA | OG5_126566 |	789	24	461	558	690	242	7e-22	42.47	57.53
Locus_5314_Transcript_2/2_Confidence_1.000	407	aaeg|AAEL014742-PA | OG5_126566 |	789	24	407	558	672	223	1e-19	43.75	57.03
Locus_10412_Transcript_1/1_Confidence_1.000	1907	aaeg|AAEL014742-PA | OG5_126566 |	789	1026	292	50	275	258	3e-21	35.08	50.81
Locus_31737_Transcript_1/1_Confidence_1.000	960	aaeg|AAEL014742-PA | OG5_126566 |	789	945	454	119	278	209	2e-16	33.54	60.37
Locus_52552_Transcript_1/1_Confidence_1.000	461	aaeg|AAEL014742-PA | OG5_126566 |	789	389	3	48	157	119	5e-06	29.77	45.8
Locus_54365_Transcript_1/1_Confidence_1.000	462	aaeg|AAEL014742-PA | OG5_126566 |	789	15	449	312	456	190	5e-15	29.66	53.1
Locus_62260_Transcript_1/1_Confidence_1.000	255	aaeg|AAEL014742-PA | OG5_126566 |	789	254	9	363	447	143	1e-09	37.93	59.77
Locus_43526_Transcript_1/1_Confidence_1.000	309	aaeg|AAEL014846-PA | OG5_163153 |	364	252	1	1	84	403	2e-46	88.1	94.05
Locus_517_Transcript_1/1_Confidence_1.000	596	aaeg|AAEL014987-PA | OG5_208506 |	123	463	248	48	119	286	3e-30	75	84.72
Locus_2550_Transcript_1/1_Confidence_1.000	1683	aaeg|AAEL015119-PA | OG5_175502 |	322	147	1055	12	276	376	3e-38	39.03	52.26
Locus_19916_Transcript_1/1_Confidence_1.000	290	aaeg|AAEL015354-PA | OG5_149421 |	719	284	18	191	277	289	4e-29	58.43	73.03
Locus_38033_Transcript_1/1_Confidence_1.000	566	aaeg|AAEL015534-PA | OG5_155372 |	550	1	477	150	329	221	6e-19	52.15	59.14
Locus_73597_Transcript_1/1_Confidence_1.000	1011	aaeo|NP_213228 | OG5_144416 | hypothetical protein aq_336 [Aquifex aeolicus VF5]	196	414	16	58	172	131	3e-07	32.85	45.99
Locus_22226_Transcript_1/1_Confidence_1.000	781	aaeo|NP_213376 | OG5_130598 | ADP-ribosylglycohydrolase [Aquifex aeolicus VF5]	330	15	563	149	321	143	1e-08	29.1	46.56
Locus_35267_Transcript_1/1_Confidence_1.000	1709	afum|Afu1g01800 | OG5_149700 | MFS transporter, putative	370	1	867	79	370	736	3e-89	49.66	64.63
Locus_59245_Transcript_1/1_Confidence_1.000	287	afum|Afu1g02550 | OG5_126605 | tubulin alpha-1 subunit	448	287	3	260	351	229	2e-21	46.32	57.89
Locus_57988_Transcript_1/1_Confidence_1.000	492	afum|Afu1g03100 | OG5_127404 | ATP synthase delta chain, mitochondrialprecursor, putative	165	378	1	26	151	566	3e-72	86.51	92.86
Locus_60297_Transcript_1/1_Confidence_1.000	323	afum|Afu1g05040 | OG5_126883 | protein mitochondrial targeting protein (Mas1),putative	413	323	3	198	304	510	1e-61	85.05	97.2
Locus_45781_Transcript_1/1_Confidence_1.000	255	afum|Afu1g05630 | OG5_126820 | 40s ribosomal protein s3	266	3	254	138	221	425	6e-51	95.24	97.62
Locus_48510_Transcript_1/1_Confidence_1.000	519	afum|Afu1g05990 | OG5_126957 | ribosomal protein L16a	171	1	249	89	171	283	1e-29	79.52	89.16
Locus_71936_Transcript_1/1_Confidence_1.000	421	afum|Afu1g06390 | OG5_126631 | translation elongation factor EF-1 alpha subunit, putative	460	2	421	251	390	672	1e-84	89.29	94.29
Locus_71801_Transcript_1/1_Confidence_1.000	252	afum|Afu1g09540 | OG5_130969 | negative regulator of cdc42p	123	69	1	1	23	119	2e-07	100	100
Locus_36517_Transcript_1/1_Confidence_1.000	256	afum|Afu1g12070 | OG5_127169 | glycine cleavage system H protein	175	3	254	27	106	230	5e-23	54.76	69.05
Locus_61353_Transcript_1/1_Confidence_1.000	347	afum|Afu1g12610 | OG5_127167 | Hsp70 chaperone Hsp88	714	346	2	382	496	552	2e-65	84.35	92.17
Locus_64363_Transcript_1/1_Confidence_1.000	291	afum|Afu1g14330 | OG5_126574 | ABC transporter, putative	1497	290	117	1430	1487	243	1e-22	68.97	82.76
Locus_62002_Transcript_1/1_Confidence_1.000	333	afum|Afu1g14430 | OG5_146732 | chitin binding protein, putative	290	6	332	20	133	313	1e-33	50.88	70.18
Locus_65487_Transcript_1/1_Confidence_1.000	253	afum|Afu1g17440 | OG5_126574 | ABC drug exporter AbcA	1452	252	1	238	321	393	5e-43	84.52	92.86
Locus_65039_Transcript_1/1_Confidence_1.000	329	afum|Afu1g17540 | OG5_209277 | hypothetical protein	405	327	166	249	303	134	2e-08	54.55	67.27
Locus_58177_Transcript_1/1_Confidence_1.000	367	afum|Afu2g01320 | OG5_128979 | P-type ATPase, putative	1079	1	366	869	988	336	7e-35	64.23	77.24
Locus_54001_Transcript_1/1_Confidence_1.000	254	afum|Afu2g02530 | OG5_126780 | casein kinase I, putative	383	2	253	30	113	465	1e-55	98.81	100
Locus_4689_Transcript_1/1_Confidence_1.000	1020	afum|Afu2g03560 | OG5_129304 | two-component osmosensing histidine kinase(Bos1), putative	1337	243	623	1134	1264	286	1e-25	43.18	65.15
Locus_59277_Transcript_1/1_Confidence_1.000	305	afum|Afu2g05440 | OG5_128400 | Hypothetical protein	229	7	297	29	125	364	6e-42	69.07	83.51
Locus_72212_Transcript_1/1_Confidence_1.000	290	afum|Afu2g05880 | OG5_126686 | ammonium transporter MEAA	562	288	4	292	386	398	1e-44	76.84	88.42
Locus_49662_Transcript_1/1_Confidence_1.000	259	afum|Afu2g05950 | OG5_127322 | snRNP and snoRNP protein (Snu13), putative	126	130	258	3	45	188	4e-17	81.4	93.02
Locus_35602_Transcript_1/1_Confidence_1.000	273	afum|Afu2g08130 | OG5_126988 | ribosomal protein L41	275	11	268	119	204	244	3e-24	67.44	80.23
Locus_56474_Transcript_1/1_Confidence_1.000	548	afum|Afu2g08130 | OG5_126988 | ribosomal protein L41	275	53	397	123	234	517	4e-63	87.83	91.3
Locus_71909_Transcript_1/1_Confidence_1.000	321	afum|Afu2g09850 | OG5_141379 | oxidoreductase, 2-nitropropane dioxygenasefamily, putative	355	321	1	6	112	449	3e-53	91.59	94.39
Locus_24805_Transcript_1/1_Confidence_1.000	356	afum|Afu2g12400 | OG5_127249 | ATP synthase oligomycin sensitivity conferralprotein, putative	227	3	356	97	213	431	1e-51	72.03	83.9
Locus_72638_Transcript_1/1_Confidence_1.000	274	afum|Afu2g13440 | OG5_132930 | chitin synthase E	1848	4	270	1046	1134	305	6e-31	59.55	73.03
Locus_58608_Transcript_1/1_Confidence_1.000	378	afum|Afu2g14590 | OG5_126798 | MFS monosaccharide transporter, putative	530	378	4	64	188	502	4e-59	76.8	88.8
Locus_56432_Transcript_1/1_Confidence_1.000	301	afum|Afu2g16880 | OG5_127166 | ribosomal protein L37a	92	31	300	1	90	428	2e-53	92.22	94.44
Locus_71947_Transcript_1/1_Confidence_1.000	386	afum|Afu2g17250 | OG5_159298 | esterase, putative	265	105	383	20	116	301	6e-32	58.76	74.23
Locus_57913_Transcript_1/1_Confidence_1.000	908	afum|Afu3g02100 | OG5_175961 | short-chain dehydrogenase/reductase familyprotein, putative	681	110	904	39	305	783	3e-96	55.88	68.01
Locus_72152_Transcript_1/1_Confidence_1.000	345	afum|Afu3g02100 | OG5_175961 | short-chain dehydrogenase/reductase familyprotein, putative	681	2	343	123	240	249	2e-23	50	61.67
Locus_73094_Transcript_1/1_Confidence_1.000	952	afum|Afu3g03070 | OG5_209407 | MYND domain protein, putative	233	790	152	10	218	226	8e-20	31.74	43.91
Locus_20148_Transcript_1/1_Confidence_1.000	1011	afum|Afu3g06840 | OG5_126890 | cytosolic small ribosomal subunit S4, putative	261	39	818	1	260	1238	9e-170	86.54	94.62
Locus_40695_Transcript_1/1_Confidence_1.000	1640	afum|Afu3g07640 | OG5_127253 | plasma membrane H+-ATPase	988	1638	1	105	640	1954	0	72.89	82.6
Locus_52063_Transcript_1/1_Confidence_1.000	414	afum|Afu3g07640 | OG5_127253 | plasma membrane H+-ATPase	988	338	3	6	109	154	2e-10	40	57.5
Locus_72052_Transcript_1/1_Confidence_1.000	306	afum|Afu3g08380 | OG5_127487 | inorganic diphosphatase, putative	396	306	7	282	382	419	2e-48	74.26	88.12
Locus_63066_Transcript_1/1_Confidence_1.000	269	afum|Afu3g09290 | OG5_129051 | phosphoglycerate mutase,2,3-bisphosphoglycerate-independent	520	1	231	444	520	334	4e-36	79.22	89.61
Locus_55261_Transcript_1/1_Confidence_1.000	268	afum|Afu3g09320 | OG5_126679 | serine hydroxymethyltransferase	471	51	266	1	72	318	5e-34	83.33	95.83
Locus_62427_Transcript_1/1_Confidence_1.000	413	afum|Afu3g09320 | OG5_126679 | serine hydroxymethyltransferase	471	1	228	396	471	266	5e-26	72.37	84.21
Locus_24167_Transcript_1/1_Confidence_1.000	1540	afum|Afu3g11500 | OG5_155786 | NB-ARC domain protein, putative	1458	519	13	19	171	175	3e-11	29.41	50
Locus_62868_Transcript_1/1_Confidence_1.000	361	afum|Afu3g11830 | OG5_127226 | phosphoglucomutase	555	3	359	136	255	474	5e-55	76.67	84.17
Locus_63376_Transcript_1/1_Confidence_1.000	340	afum|Afu3g12170 | OG5_169149 | MFS sugar transporter, putative	594	338	3	310	421	414	1e-46	64.29	80.36
Locus_71784_Transcript_1/1_Confidence_1.000	407	afum|Afu3g12170 | OG5_169149 | MFS sugar transporter, putative	594	3	323	473	579	437	2e-49	72.9	85.98
Locus_14866_Transcript_1/1_Confidence_1.000	1833	afum|Afu3g12410 | OG5_129052 | DNA binding protein	518	156	1733	21	517	424	5e-43	26.07	47.3
Locus_53925_Transcript_1/1_Confidence_1.000	1070	afum|Afu3g13320 | OG5_127014 | 40S ribosomal protein S0, putative	297	71	802	1	242	1149	2e-155	86.89	93.85
Locus_72416_Transcript_1/1_Confidence_1.000	302	afum|Afu3g14420 | OG5_129261 | chitin synthase G	911	2	301	298	397	503	3e-58	91	94
Locus_40859_Transcript_1/1_Confidence_1.000	308	afum|Afu3g14440 | OG5_139378 | cytochrome c oxidase family protein	62	68	244	1	59	210	8e-21	67.8	76.27
Locus_63610_Transcript_1/1_Confidence_1.000	333	afum|Afu4g00150 | OG5_163553 | maltose permease	537	1	330	333	442	463	1e-53	86.36	90.91
Locus_62670_Transcript_1/1_Confidence_1.000	391	afum|Afu4g03230 | OG5_149851 | extracellular guanyl-specific ribonuclease T1,putative	131	86	391	5	100	233	4e-23	46.6	61.17
Locus_62584_Transcript_1/1_Confidence_1.000	387	afum|Afu4g04520 | OG5_126862 | succinyl-CoA synthetase beta subunit, putative	444	2	385	120	247	611	5e-76	88.28	94.53
Locus_47945_Transcript_1/1_Confidence_1.000	362	afum|Afu4g06620 | OG5_126857 | Glutamate/Leucine/Phenylalanine/Valinedehydrogenase, putative	458	360	1	76	195	546	2e-66	88.33	94.17
Locus_62812_Transcript_1/1_Confidence_1.000	417	afum|Afu4g10460 | OG5_128072 | homocitrate synthase	463	417	1	120	258	686	8e-87	92.09	98.56
Locus_71830_Transcript_1/1_Confidence_1.000	492	afum|Afu4g11080 | OG5_126680 | acetyl-coenzyme a synthetase	670	2	490	126	288	732	4e-91	82.21	92.02
Locus_61053_Transcript_1/1_Confidence_1.000	374	afum|Afu4g11210 | OG5_136560 | conserved hypothetical protein	740	367	2	574	708	136	2e-08	30.88	47.79
Locus_55721_Transcript_1/1_Confidence_1.000	320	afum|Afu4g11650 | OG5_126779 | 2-oxoglutarate dehydrogenase complex alphasubunit, putative	1057	1	318	468	573	512	4e-59	83.02	95.28
Locus_65508_Transcript_1/1_Confidence_1.000	301	afum|Afu4g13510 | OG5_129572 | isocitrate lyase	538	2	301	337	436	483	8e-57	85	94
Locus_14666_Transcript_1/1_Confidence_1.000	257	afum|Afu5g00590 | OG5_163613 | hypothetical protein	348	4	255	159	247	155	1e-11	40.45	58.43
Locus_29448_Transcript_1/1_Confidence_1.000	506	afum|Afu5g00590 | OG5_163613 | hypothetical protein	348	505	230	233	346	190	2e-15	38.6	53.51
Locus_63462_Transcript_1/1_Confidence_1.000	396	afum|Afu5g01420 | OG5_146806 | conserved hypothetical protein	205	3	329	97	205	497	8e-62	84.4	90.83
Locus_44845_Transcript_1/1_Confidence_1.000	604	afum|Afu5g03020 | OG5_127050 | 60s ribosomal protein l2	373	23	511	208	372	591	1e-72	67.27	82.42
Locus_72937_Transcript_1/1_Confidence_1.000	254	afum|Afu5g04210 | OG5_130025 | ubiquinol-cytochrome C reductase complex coreprotein 2, putative	460	254	3	95	178	219	4e-20	52.38	66.67
Locus_63461_Transcript_1/1_Confidence_1.000	250	afum|Afu5g04320 | OG5_127310 | RAB GTPase Ypt1, putative	159	2	238	63	141	382	8e-46	92.41	94.94
Locus_35826_Transcript_1/1_Confidence_1.000	497	afum|Afu5g05520 | OG5_127048 | cation-transporting ATPase, putative	1263	179	496	666	766	132	1e-07	35.96	49.12
Locus_17660_Transcript_1/1_Confidence_1.000	463	afum|Afu5g05690 | OG5_128434 | chorismate mutase/prephenate dehydratase	313	384	244	215	263	115	7e-08	55.1	59.18
Locus_57838_Transcript_1/1_Confidence_1.000	278	afum|Afu5g05710 | OG5_126700 | pseudouridylate synthase family protein	487	1	273	357	453	197	6e-17	50	61
Locus_43792_Transcript_1/1_Confidence_1.000	689	afum|Afu5g06360 | OG5_126641 | 60s ribosomal protein yl6	254	2	439	109	254	693	4e-89	90.41	96.58
Locus_47862_Transcript_1/1_Confidence_1.000	393	afum|Afu5g06360 | OG5_126641 | 60s ribosomal protein yl6	254	25	393	1	123	570	4e-72	85.37	95.93
Locus_72660_Transcript_1/1_Confidence_1.000	250	afum|Afu5g06660 | OG5_137002 | UPF0187 domain membrane protein	491	1	249	266	348	280	9e-29	57.83	84.34
Locus_62373_Transcript_1/1_Confidence_1.000	287	afum|Afu5g06780 | OG5_128943 | carbamoyl-phosphate synthase, small subunit	453	285	52	357	435	290	5e-30	69.62	83.54
Locus_52985_Transcript_1/1_Confidence_1.000	289	afum|Afu5g09230 | OG5_127238 | transaldolase	324	2	289	177	272	377	4e-43	81.25	92.71
Locus_59620_Transcript_1/1_Confidence_1.000	711	afum|Afu5g10010 | OG5_187895 | conserved hypothetical protein	266	555	202	6	125	368	3e-40	63.33	77.5
Locus_4660_Transcript_1/1_Confidence_1.000	1073	afum|Afu5g10930 | OG5_169283 | hypothetical protein	292	992	189	29	292	776	4e-99	57.04	71.48
Locus_58806_Transcript_1/1_Confidence_1.000	485	afum|Afu6g00430 | OG5_152643 | IgE-binding protein	200	15	434	46	199	195	9e-17	34.57	50.62
Locus_29014_Transcript_1/1_Confidence_1.000	269	afum|Afu6g03060 | OG5_126798 | monosaccharide transporter	531	3	269	107	195	277	5e-28	73.03	85.39
Locus_59474_Transcript_1/1_Confidence_1.000	380	afum|Afu6g03560 | OG5_152643 | IgE-binding protein, putative	203	17	379	80	202	204	2e-18	37.98	53.49
Locus_62185_Transcript_1/1_Confidence_1.000	344	afum|Afu6g06770 | OG5_126698 | enolase	438	343	116	363	438	359	3e-39	86.84	96.05
Locus_63430_Transcript_1/1_Confidence_1.000	255	afum|Afu6g08050 | OG5_127175 | 6-phosphogluconate dehydrogenase,decarboxylating	508	3	254	291	374	382	7e-43	85.71	92.86
Locus_62657_Transcript_1/1_Confidence_1.000	291	afum|Afu6g09990 | OG5_129093 | importin beta-4 subunit, putative	1095	2	265	888	975	276	4e-27	56.82	69.32
Locus_46126_Transcript_1/1_Confidence_1.000	339	afum|Afu6g10580 | OG5_155943 | antigenic CFEM domain protein, putative	202	83	337	3	87	206	6e-19	51.16	70.93
Locus_60413_Transcript_1/1_Confidence_1.000	554	afum|Afu6g10580 | OG5_155943 | antigenic CFEM domain protein, putative	202	99	308	22	90	144	8e-10	49.3	64.79
Locus_61582_Transcript_1/1_Confidence_1.000	300	afum|Afu6g10660 | OG5_133655 | ATP-citrat-lyase	486	137	298	1	54	243	3e-23	87.04	92.59
Locus_32591_Transcript_1/1_Confidence_1.000	262	afum|Afu6g11610 | OG5_134276 | 1,4-beta-D-glucan-cellobiohydrolyase, putative	532	1	255	262	347	235	4e-22	55.81	65.12
Locus_33107_Transcript_1/1_Confidence_1.000	383	afum|Afu6g11610 | OG5_134276 | 1,4-beta-D-glucan-cellobiohydrolyase, putative	532	2	325	434	532	188	3e-15	50	63.89
Locus_72682_Transcript_1/1_Confidence_1.000	323	afum|Afu6g11960 | OG5_135789 | conserved hypothetical protein	256	8	322	116	222	258	5e-26	41.12	62.62
Locus_42287_Transcript_1/1_Confidence_1.000	537	afum|Afu7g00260 | OG5_127966 | squalene-hopene cyclase	689	509	24	48	206	231	3e-20	38.89	64.81
Locus_61642_Transcript_1/1_Confidence_1.000	350	afum|Afu7g00600 | OG5_146856 | hydrolase, CocE/NonD family, putative	592	5	349	364	477	439	6e-50	72.17	82.61
Locus_59679_Transcript_1/1_Confidence_1.000	358	afum|Afu7g00610 | OG5_169376 | conserved hypothetical protein	182	357	13	60	174	343	4e-39	65.22	80
Locus_49891_Transcript_1/1_Confidence_1.000	401	afum|Afu7g01010 | OG5_126661 | alcohol dehydrogenase, putative	353	3	398	195	325	494	2e-59	71.21	84.09
Locus_58158_Transcript_1/1_Confidence_1.000	294	afum|Afu7g01860 | OG5_128289 | heat shock protein (Sti1), putative	585	1	231	509	585	310	2e-32	76.62	88.31
Locus_58861_Transcript_1/1_Confidence_1.000	327	afum|Afu7g01860 | OG5_128289 | heat shock protein (Sti1), putative	585	325	2	286	393	396	3e-44	67.59	81.48
Locus_35448_Transcript_1/1_Confidence_1.000	843	afum|Afu7g01930 | OG5_159612 | ESDC	261	486	7	1	156	474	2e-55	58.13	75
Locus_30286_Transcript_1/1_Confidence_1.000	575	afum|Afu7g05660 | OG5_129819 | elongation factor EF-3, putative	1065	1	573	621	811	957	2e-120	89.53	95.81
Locus_63845_Transcript_1/1_Confidence_1.000	344	afum|Afu7g05660 | OG5_129819 | elongation factor EF-3, putative	1065	343	2	520	633	481	1e-54	77.19	85.09
Locus_57651_Transcript_1/1_Confidence_1.000	1745	afum|Afu7g05920 | OG5_126939 | stearic acid desaturase (SdeA), putative	456	1475	141	3	445	1984	0	81.8	89.89
Locus_55791_Transcript_1/1_Confidence_1.000	359	afum|Afu7g06350 | OG5_126728 | phosphate transporter, putative	655	357	85	563	653	422	2e-47	84.62	96.7
Locus_58987_Transcript_1/1_Confidence_1.000	396	afum|Afu7g06350 | OG5_126728 | phosphate transporter, putative	655	3	395	129	259	449	7e-51	81.68	91.6
Locus_60739_Transcript_1/1_Confidence_1.000	439	afum|Afu7g06350 | OG5_126728 | phosphate transporter, putative	655	2	439	438	583	682	3e-84	84.93	93.15
Locus_62825_Transcript_1/1_Confidence_1.000	623	afum|Afu7g08490 | OG5_126929 | class V chitinase, putative	444	3	392	313	441	305	2e-30	50.77	71.54
Locus_71858_Transcript_1/1_Confidence_1.000	316	afum|Afu8g01410 | OG5_126929 | class V chitinase ChiB1	433	16	315	36	136	274	1e-27	52.48	70.3
Locus_60711_Transcript_1/1_Confidence_1.000	302	afum|Afu8g02770 | OG5_127381 | cytidine deaminase, putative	151	296	12	18	105	299	3e-33	65.26	72.63
Locus_60088_Transcript_1/1_Confidence_1.000	352	afum|Afu8g05440 | OG5_136382 | mitochondrial ATPase subunit (ATP4), putative	274	344	6	34	146	331	2e-36	59.13	79.13
Locus_10105_Transcript_1/1_Confidence_1.000	2675	afum|Afu8g05780 | OG5_126538 | NACHT domain protein, putative	782	556	915	544	651	154	2e-08	38.84	50.41
Locus_39984_Transcript_1/1_Confidence_1.000	540	afum|Afu8g05780 | OG5_126538 | NACHT domain protein, putative	782	94	534	573	747	201	3e-16	32.96	50.84
Locus_72462_Transcript_1/1_Confidence_1.000	312	afum|Afu8g07080 | OG5_142842 | elastinolytic metalloproteinase Mep	634	3	311	477	578	368	3e-40	66.99	74.76
Locus_12536_Transcript_1/1_Confidence_1.000	302	agam|AGAP000297-PA | OG5_149510 |	166	293	201	136	166	109	7e-06	67.74	87.1
Locus_11360_Transcript_1/1_Confidence_1.000	706	agam|AGAP000344-PA | OG5_152178 |	224	140	556	1	128	494	2e-59	71.22	79.86
Locus_33833_Transcript_1/1_Confidence_1.000	294	agam|AGAP000359-PA | OG5_142439 |	492	1	294	97	194	419	7e-48	78.57	90.82
Locus_54529_Transcript_1/1_Confidence_1.000	581	agam|AGAP000668-PA | OG5_133306 |	1413	12	149	1018	1064	127	1e-06	41.67	56.25
Locus_20064_Transcript_1/1_Confidence_1.000	268	agam|AGAP000879-PA | OG5_158643 |	549	267	1	331	419	331	1e-35	67.42	78.65
Locus_22342_Transcript_1/1_Confidence_1.000	368	agam|AGAP000879-PA | OG5_158643 |	549	308	3	19	120	404	4e-45	70.59	84.31
Locus_41718_Transcript_1/1_Confidence_1.000	481	agam|AGAP000883-PA | OG5_127580 |	427	481	11	271	427	734	4e-94	84.08	91.72
Locus_41871_Transcript_1/1_Confidence_1.000	278	agam|AGAP001312-PA | OG5_127106 |	328	278	3	103	194	370	4e-42	88.04	95.65
Locus_34636_Transcript_1/1_Confidence_1.000	420	agam|AGAP001630-PA | OG5_127002 |	212	419	3	72	210	628	3e-81	84.17	92.09
Locus_15078_Transcript_1/1_Confidence_1.000	540	agam|AGAP001799-PA | OG5_127228 |	284	540	415	243	284	194	3e-16	88.1	92.86
Locus_5633_Transcript_1/1_Confidence_1.000	388	agam|AGAP001910-PA | OG5_126820 |	244	387	76	104	207	546	1e-68	97.12	98.08
Locus_22823_Transcript_1/1_Confidence_1.000	393	agam|AGAP002020-PA | OG5_133612 |	174	392	3	36	165	410	5e-49	62.31	76.92
Locus_17890_Transcript_1/1_Confidence_1.000	431	agam|AGAP002170-PA | OG5_127830 |	231	1	429	77	219	631	2e-81	78.32	88.81
Locus_12959_Transcript_1/1_Confidence_1.000	505	agam|AGAP002346-PA | OG5_126681 |	152	31	444	4	141	558	4e-71	93.48	99.28
Locus_20356_Transcript_1/1_Confidence_1.000	266	agam|AGAP002364-PA | OG5_129817 |	739	3	266	638	725	318	3e-33	63.64	82.95
Locus_19842_Transcript_1/1_Confidence_1.000	254	agam|AGAP002559-PA | OG5_155143 |	308	253	2	167	250	351	1e-39	72.62	90.48
Locus_29528_Transcript_1/1_Confidence_1.000	353	agam|AGAP002559-PA | OG5_155143 |	308	346	224	268	308	202	6e-18	90.24	97.56
Locus_42299_Transcript_1/1_Confidence_1.000	368	agam|AGAP002685-PA | OG5_126969 |	131	296	3	1	98	483	8e-61	93.88	97.96
Locus_19992_Transcript_1/1_Confidence_1.000	261	agam|AGAP002737-PA | OG5_126585 |	6668	260	21	6535	6614	220	1e-19	48.75	66.25
Locus_21830_Transcript_1/1_Confidence_1.000	318	agam|AGAP002754-PA | OG5_127072 |	186	21	317	70	170	203	1e-18	44.12	60.78
Locus_32571_Transcript_1/1_Confidence_1.000	216	agam|AGAP003261-PA | OG5_138441 |	1627	41	187	1579	1627	181	9e-15	81.63	85.71
Locus_7159_Transcript_1/1_Confidence_1.000	460	agam|AGAP003325-PA | OG5_133210 |	83	113	355	1	81	347	2e-40	77.78	88.89
Locus_30411_Transcript_1/1_Confidence_1.000	523	agam|AGAP003469-PA | OG5_152175 |	240	151	522	28	158	199	4e-17	38.17	58.78
Locus_27886_Transcript_1/1_Confidence_1.000	352	agam|AGAP003556-PA | OG5_126874 |	417	3	350	202	317	520	5e-63	90.52	98.28
Locus_40565_Transcript_1/1_Confidence_1.000	454	agam|AGAP003734-PA | OG5_168538 |	287	229	453	4	78	229	3e-21	49.33	74.67
Locus_4503_Transcript_1/1_Confidence_1.000	808	agam|AGAP003781-PA | OG5_155083 |	619	806	15	147	408	679	5e-82	46.04	69.81
Locus_24570_Transcript_1/1_Confidence_1.000	834	agam|AGAP003812-PA | OG5_133060 |	134	830	510	11	111	128	3e-07	31.78	49.53
Locus_26525_Transcript_1/1_Confidence_1.000	439	agam|AGAP004362-PA | OG5_126857 |	568	414	1	12	141	468	1e-53	61.87	77.7
Locus_23588_Transcript_1/1_Confidence_1.000	472	agam|AGAP004576-PA | OG5_175500 |	206	433	2	53	184	218	5e-20	63.76	68.46
Locus_6336_Transcript_1/1_Confidence_1.000	659	agam|AGAP004690-PA | OG5_163022 |	137	45	536	1	137	368	7e-42	51.41	58.76
Locus_15643_Transcript_1/1_Confidence_1.000	299	agam|AGAP004790-PA | OG5_137276 |	50	208	50	1	50	169	6e-15	67.92	81.13
Locus_22535_Transcript_1/1_Confidence_1.000	911	agam|AGAP004846-PB | OG5_129842 |	522	2	904	183	483	1313	9e-178	79.07	86.38
Locus_7176_Transcript_1/1_Confidence_1.000	1851	agam|AGAP004877-PA | OG5_126577 |	882	3	1415	408	879	1676	0	71.19	87.08
Locus_12186_Transcript_1/1_Confidence_1.000	401	agam|AGAP005046-PB | OG5_127156 |	147	298	2	43	141	250	2e-25	76.77	88.89
Locus_25542_Transcript_1/1_Confidence_1.000	353	agam|AGAP005076-PA | OG5_129890 |	688	352	47	167	266	423	2e-47	79.41	89.22
Locus_13976_Transcript_1/1_Confidence_1.000	375	agam|AGAP005109-PA | OG5_152458 |	122	34	354	1	105	309	1e-34	48.6	71.03
Locus_4956_Transcript_1/1_Confidence_1.000	1759	agam|AGAP005134-PA | OG5_127165 |	551	1673	54	1	542	2618	0	91.88	96.31
Locus_39361_Transcript_1/1_Confidence_1.000	269	agam|AGAP005462-PA | OG5_129293 |	286	59	268	1	70	315	2e-34	82.86	87.14
Locus_14838_Transcript_1/1_Confidence_1.000	928	agam|AGAP005471-PA | OG5_126738 |	5295	9	926	4967	5269	1104	3e-134	64.5	80.13
Locus_27696_Transcript_1/1_Confidence_1.000	310	agam|AGAP005471-PA | OG5_126738 |	5295	2	310	4511	4616	306	8e-31	55.66	70.75
Locus_28738_Transcript_1/1_Confidence_1.000	594	agam|AGAP005553-PA | OG5_168581 |	337	2	529	157	337	594	2e-73	60.77	77.9
Locus_12690_Transcript_1/1_Confidence_1.000	407	agam|AGAP005662-PA | OG5_129653 |	419	2	283	324	416	386	5e-43	80.85	87.23
Locus_26706_Transcript_1/1_Confidence_1.000	375	agam|AGAP005662-PA | OG5_129653 |	419	375	1	162	286	608	7e-76	87.2	95.2
Locus_34070_Transcript_1/1_Confidence_1.000	501	agam|AGAP006176-PA | OG5_127196 |	756	415	2	99	237	625	1e-74	83.45	90.65
Locus_12196_Transcript_1/1_Confidence_1.000	1111	agam|AGAP006186-PE | OG5_126674 |	1018	114	1109	1	331	1542	0	93.37	97.59
Locus_37609_Transcript_1/1_Confidence_1.000	258	agam|AGAP006366-PA | OG5_126779 |	1059	258	4	126	209	283	3e-28	62.35	81.18
Locus_26881_Transcript_1/1_Confidence_1.000	883	agam|AGAP006456-PA | OG5_128842 |	262	853	80	1	261	1040	2e-140	75.86	84.67
Locus_14832_Transcript_1/1_Confidence_1.000	709	agam|AGAP006830-PA | OG5_175305 |	169	108	401	1	99	441	3e-52	83.84	92.93
Locus_7311_Transcript_1/1_Confidence_1.000	644	agam|AGAP006859-PA | OG5_138446 |	122	463	260	28	95	264	7e-27	70.59	82.35
Locus_16016_Transcript_1/1_Confidence_1.000	1384	agam|AGAP006868-PA | OG5_149991 |	856	1368	832	22	209	161	7e-10	39.22	48.04
Locus_23198_Transcript_1/1_Confidence_1.000	401	agam|AGAP006898-PA | OG5_126929 |	1017	401	108	920	1017	494	3e-56	81.63	91.84
Locus_33030_Transcript_1/1_Confidence_1.000	367	agam|AGAP006898-PA | OG5_126929 |	1017	3	365	501	617	419	3e-46	71.07	80.99
Locus_23632_Transcript_1/1_Confidence_1.000	461	agam|AGAP006918-PA | OG5_129973 |	175	40	456	1	139	605	4e-78	78.42	89.21
Locus_34865_Transcript_1/1_Confidence_1.000	288	agam|AGAP006936-PA | OG5_128006 |	306	288	1	68	163	373	1e-42	77.08	88.54
Locus_36592_Transcript_1/1_Confidence_1.000	438	agam|AGAP007134-PA | OG5_126732 |	433	257	436	1	59	131	1e-07	50.82	62.3
Locus_31177_Transcript_1/1_Confidence_1.000	549	agam|AGAP007297-PA | OG5_134439 |	189	3	482	27	189	547	1e-68	59.51	76.69
Locus_17036_Transcript_1/1_Confidence_1.000	1253	agam|AGAP007406-PA | OG5_126631 |	463	1253	81	58	448	1786	0	84.14	92.07
Locus_2183_Transcript_1/1_Confidence_1.000	379	agam|AGAP007643-PC | OG5_126706 |	248	3	377	77	201	647	6e-84	93.6	100
Locus_26866_Transcript_1/1_Confidence_1.000	439	agam|AGAP007768-PA | OG5_135332 |	78	294	73	3	77	222	6e-22	57.33	70.67
Locus_35178_Transcript_1/1_Confidence_1.000	396	agam|AGAP007780-PA | OG5_133863 |	168	20	391	3	126	470	3e-58	67.74	76.61
Locus_4276_Transcript_1/1_Confidence_1.000	259	agam|AGAP007786-PA | OG5_128267 |	370	4	105	337	370	126	1e-07	76.47	82.35
Locus_36037_Transcript_1/1_Confidence_1.000	265	agam|AGAP007786-PA | OG5_128267 |	370	17	265	1	84	320	2e-34	72.62	80.95
Locus_28266_Transcript_1/1_Confidence_1.000	299	agam|AGAP007791-PA | OG5_149526 |	323	1	297	147	245	406	2e-47	71.72	85.86
Locus_17088_Transcript_1/1_Confidence_1.000	602	agam|AGAP007827-PA | OG5_126698 |	433	600	364	355	433	402	3e-44	94.94	96.2
Locus_13756_Transcript_1/1_Confidence_1.000	364	agam|AGAP007841-PA | OG5_127404 |	169	270	1	4	94	320	1e-35	64.13	84.78
Locus_11205_Transcript_1/1_Confidence_1.000	640	agam|AGAP008075-PA | OG5_128115 |	153	331	636	1	106	284	2e-29	56.36	65.45
Locus_21699_Transcript_1/1_Confidence_1.000	258	agam|AGAP008113-PA | OG5_149531 |	142	252	1	1	83	255	6e-27	58.33	73.81
Locus_36023_Transcript_1/1_Confidence_1.000	397	agam|AGAP008165-PA | OG5_132074 |	303	112	396	1	94	325	5e-35	68.42	84.21
Locus_18999_Transcript_1/1_Confidence_1.000	979	agam|AGAP008512-PA | OG5_142442 |	2838	562	978	2414	2552	676	8e-77	84.89	92.81
Locus_9456_Transcript_1/1_Confidence_1.000	504	agam|AGAP008724-PA | OG5_129154 |	119	448	92	1	119	544	2e-69	78.15	91.6
Locus_20378_Transcript_1/1_Confidence_1.000	623	agam|AGAP008727-PA | OG5_133034 |	182	575	36	11	182	588	1e-74	57.22	77.78
Locus_19139_Transcript_1/1_Confidence_1.000	274	agam|AGAP008763-PA | OG5_146444 |	485	3	188	422	483	285	2e-29	88.71	93.55
Locus_28616_Transcript_1/1_Confidence_1.000	468	agam|AGAP008878-PA | OG5_144308 |	167	47	442	2	136	238	3e-23	39.71	55.88
Locus_7656_Transcript_1/1_Confidence_1.000	316	agam|AGAP009431-PA | OG5_127484 |	83	257	9	1	83	411	7e-51	90.36	97.59
Locus_36813_Transcript_1/1_Confidence_1.000	255	agam|AGAP009602-PA | OG5_144278 |	165	2	253	24	107	276	6e-30	66.67	76.19
Locus_20972_Transcript_1/1_Confidence_1.000	323	agam|AGAP009833-PA | OG5_127746 |	282	2	85	255	282	131	3e-08	85.71	100
Locus_28140_Transcript_1/1_Confidence_1.000	436	agam|AGAP010065-PA | OG5_127022 |	165	26	433	1	136	537	4e-68	72.06	88.24
Locus_7832_Transcript_1/1_Confidence_1.000	1338	agam|AGAP010147-PA | OG5_126577 |	1959	1338	1	771	1216	1507	0	88.12	95.74
Locus_23594_Transcript_1/1_Confidence_1.000	293	agam|AGAP010193-PA | OG5_155332 |	236	2	292	83	179	455	1e-55	80.41	90.72
Locus_22774_Transcript_1/1_Confidence_1.000	252	agam|AGAP010232-PA | OG5_127561 |	298	2	247	129	210	380	6e-44	81.71	91.46
Locus_30790_Transcript_1/1_Confidence_1.000	530	agam|AGAP010232-PA | OG5_127561 |	298	3	248	212	293	327	9e-35	65.85	85.37
Locus_48195_Transcript_1/1_Confidence_1.000	290	agam|AGAP010612-PA | OG5_127390 |	222	2	277	122	216	138	1e-09	35.05	54.64
Locus_5841_Transcript_1/1_Confidence_1.000	374	agam|AGAP011077-PA | OG5_127261 |	137	42	374	1	106	467	3e-58	82.88	88.29
Locus_12016_Transcript_1/1_Confidence_1.000	664	agam|AGAP011131-PA | OG5_129868 |	172	35	517	1	161	570	9e-72	62.11	81.99
Locus_22914_Transcript_1/1_Confidence_1.000	412	agam|AGAP011159-PA | OG5_130266 |	153	8	343	38	149	489	3e-61	77.68	90.18
Locus_9536_Transcript_1/1_Confidence_1.000	324	agam|AGAP011514-PA | no_group |	233	324	1	116	223	562	1e-71	99.07	100
Locus_31037_Transcript_1/1_Confidence_1.000	375	agam|AGAP011514-PA | no_group |	233	375	1	82	206	663	1e-86	99.2	100
Locus_42297_Transcript_1/1_Confidence_1.000	305	agam|AGAP011514-PA | no_group |	233	304	2	117	217	522	1e-65	99.01	100
Locus_52172_Transcript_1/1_Confidence_1.000	277	agam|AGAP011514-PA | no_group |	233	276	1	115	206	476	6e-59	98.91	100
Locus_58026_Transcript_1/1_Confidence_1.000	217	agam|AGAP011514-PA | no_group |	233	217	2	66	137	373	8e-44	87.5	94.44
Locus_61491_Transcript_1/1_Confidence_1.000	310	agam|AGAP011514-PA | no_group |	233	2	310	120	222	529	1e-66	97.09	100
Locus_27148_Transcript_1/1_Confidence_1.000	436	agam|AGAP011629-PA | OG5_126968 |	433	2	436	250	394	676	1e-85	84.14	92.41
Locus_20968_Transcript_1/1_Confidence_1.000	283	agam|AGAP011706-PA | OG5_127016 |	151	54	281	2	77	230	4e-23	84.21	92.11
Locus_4282_Transcript_1/1_Confidence_1.000	1211	agam|AGAP011936-PA | OG5_139093 |	537	1	837	254	532	1469	0	93.91	97.85
Locus_39738_Transcript_1/1_Confidence_1.000	276	agam|AGAP011936-PA | OG5_139093 |	537	272	3	173	262	470	4e-55	95.56	100
Locus_8215_Transcript_1/1_Confidence_1.000	327	agam|AGAP011937-PA | OG5_139093 |	579	2	295	482	579	523	3e-62	98.98	98.98
Locus_27674_Transcript_1/1_Confidence_1.000	338	agam|AGAP011937-PA | OG5_139093 |	579	337	5	222	332	598	5e-73	91.89	96.4
Locus_18192_Transcript_1/1_Confidence_1.000	272	agam|AGAP012056-PA | OG5_127118 |	148	2	241	69	148	407	1e-49	96.25	100
Locus_23793_Transcript_1/1_Confidence_1.000	894	agam|AGAP012549-PA | OG5_152174 |	247	129	743	46	247	585	8e-72	55.07	73.91
Locus_24412_Transcript_1/1_Confidence_1.000	311	agam|AGAP012819-PA | no_group |	168	308	9	56	155	191	4e-17	42	53
Locus_34199_Transcript_1/1_Confidence_1.000	263	agam|AGAP012891-PA | OG5_210150 |	165	262	2	46	132	401	1e-48	83.91	89.66
Locus_59106_Transcript_1/1_Confidence_1.000	565	amel|NP_001011578 | OG5_144195 | vitellogenin [Apis mellifera]	1770	41	547	1596	1769	167	1e-11	31.69	45.9
Locus_2968_Transcript_1/1_Confidence_1.000	266	amel|XP_001119886 | OG5_127046 | PREDICTED: similar to Ribosomal protein S28b CG2998-PA [Apis mellifera]	65	219	67	1	51	229	6e-24	88.24	94.12
Locus_38322_Transcript_1/1_Confidence_1.000	284	amel|XP_001120139 | OG5_126877 | PREDICTED: similar to Ubiquitin-conjugating enzyme E2-17 kDa (Ubiquitin-protein ligase) (Ubiquitin carrier protein) (Protein effete) [Apis mellifera]	147	120	284	1	55	298	3e-33	100	100
Locus_23508_Transcript_1/1_Confidence_1.000	348	amel|XP_001120263 | OG5_127448 | PREDICTED: similar to 60S ribosomal protein L38 [Apis mellifera]	75	271	77	1	65	292	9e-33	84.62	93.85
Locus_71832_Transcript_1/1_Confidence_1.000	255	amel|XP_001120360 | OG5_126766 | PREDICTED: similar to Ribosomal protein L21 CG12775-PA [Apis mellifera]	159	48	251	1	68	290	5e-32	79.41	91.18
Locus_18703_Transcript_1/1_Confidence_1.000	279	amel|XP_001120364 | OG5_126845 | PREDICTED: similar to 60S acidic ribosomal protein P2 (Acidic ribosomal protein RPA1) [Apis mellifera]	114	55	279	1	75	235	4e-24	61.33	78.67
Locus_727_Transcript_1/1_Confidence_1.000	277	amel|XP_001121258 | no_group | PREDICTED: similar to Actin 88F CG5178-PA [Apis mellifera]	107	276	1	6	97	474	3e-60	97.83	98.91
Locus_3285_Transcript_1/1_Confidence_1.000	549	amel|XP_001121258 | no_group | PREDICTED: similar to Actin 88F CG5178-PA [Apis mellifera]	107	2	73	84	107	136	4e-09	100	100
Locus_10684_Transcript_1/1_Confidence_1.000	456	amel|XP_001121258 | no_group | PREDICTED: similar to Actin 88F CG5178-PA [Apis mellifera]	107	1	78	82	107	142	4e-10	96.15	100
Locus_26195_Transcript_1/1_Confidence_1.000	248	amel|XP_001121258 | no_group | PREDICTED: similar to Actin 88F CG5178-PA [Apis mellifera]	107	1	246	20	101	420	2e-52	98.78	98.78
Locus_26640_Transcript_1/1_Confidence_1.000	274	amel|XP_001121258 | no_group | PREDICTED: similar to Actin 88F CG5178-PA [Apis mellifera]	107	272	12	21	107	382	2e-46	77.01	90.8
Locus_23452_Transcript_1/1_Confidence_1.000	292	amel|XP_001121380 | OG5_149336 | PREDICTED: similar to CG6131-PA [Apis mellifera]	286	292	41	71	154	389	3e-45	84.52	95.24
Locus_26656_Transcript_1/1_Confidence_1.000	268	amel|XP_001121551 | no_group | PREDICTED: similar to Actin-5C, partial [Apis mellifera]	129	2	268	4	92	454	6e-57	93.26	96.63
Locus_68003_Transcript_1/1_Confidence_1.000	272	amel|XP_001122406 | OG5_127340 | PREDICTED: similar to crinkled CG7595-PB, isoform B [Apis mellifera]	2102	2	271	1160	1233	170	6e-13	37.78	50
Locus_58303_Transcript_1/1_Confidence_1.000	264	amel|XP_001122454 | OG5_131214 | PREDICTED: similar to Cysteine-rich protein 1 (Cysteine-rich intestinal protein) (CRIP) [Apis mellifera]	78	39	128	1	30	106	6e-06	63.33	70
Locus_19813_Transcript_1/1_Confidence_1.000	259	amel|XP_001123184 | OG5_130105 | PREDICTED: similar to CG33713-PB, isoform B [Apis mellifera]	227	2	256	49	134	117	1e-06	36.05	51.16
Locus_13092_Transcript_1/1_Confidence_1.000	273	amel|XP_391829 | OG5_126849 | PREDICTED: similar to belle CG9748-PA [Apis mellifera]	701	39	158	1	47	133	3e-08	59.57	70.21
Locus_16434_Transcript_1/1_Confidence_1.000	706	amel|XP_391841 | OG5_126706 | PREDICTED: similar to 14-3-3-like protein (Leonardo protein) (14-3-3 zeta) isoform 1 [Apis mellifera]	247	2	217	161	232	386	4e-43	98.61	100
Locus_34094_Transcript_1/1_Confidence_1.000	379	amel|XP_391850 | OG5_128114 | PREDICTED: similar to CG16758-PD, isoform D [Apis mellifera]	340	2	376	192	316	379	1e-42	56	69.6
Locus_36477_Transcript_1/1_Confidence_1.000	334	amel|XP_392726 | OG5_126983 | PREDICTED: similar to Ribosomal protein S9 CG3395-PA, isoform A [Apis mellifera]	193	333	1	60	170	545	2e-69	96.4	99.1
Locus_5861_Transcript_1/1_Confidence_1.000	719	amel|XP_393281 | OG5_126577 | PREDICTED: similar to Paramyosin CG5939-PA, isoform A [Apis mellifera]	875	87	719	1	209	701	9e-84	70.42	85.45
Locus_25502_Transcript_1/1_Confidence_1.000	456	amel|XP_393322 | OG5_127130 | PREDICTED: similar to Ribosomal protein L18A CG6510-PA [Apis mellifera]	177	5	454	24	173	621	2e-80	81.33	90
Locus_4511_Transcript_1/1_Confidence_1.000	2480	amel|XP_393334 | OG5_126577 | PREDICTED: similar to Myosin heavy chain CG17927-PB, isoform B isoform 1 [Apis mellifera]	1967	115	2478	1	789	3616	0	85.71	90.27
Locus_32_Transcript_1/1_Confidence_1.000	1314	amel|XP_393371 | OG5_146298 | PREDICTED: similar to Myosin regulatory light chain 2 (MLC-2) [Apis mellifera]	213	227	703	56	213	620	9e-76	75.47	86.79
Locus_16210_Transcript_1/1_Confidence_1.000	435	amel|XP_393452 | OG5_152205 | PREDICTED: similar to CG2150-PA [Apis mellifera]	177	1	102	110	143	135	6e-09	79.41	88.24
Locus_22375_Transcript_1/1_Confidence_1.000	475	amel|XP_393614 | OG5_126953 | PREDICTED: similar to 60S ribosomal protein L7 [Apis mellifera]	261	473	6	99	254	710	1e-92	82.69	89.74
Locus_30569_Transcript_1/1_Confidence_1.000	359	amel|XP_393671 | OG5_126641 | PREDICTED: similar to Ribosomal protein L8 CG1263-PA, isoform A [Apis mellifera]	257	357	1	62	180	569	4e-72	87.39	94.96
Locus_31446_Transcript_1/1_Confidence_1.000	359	amel|XP_393671 | OG5_126641 | PREDICTED: similar to Ribosomal protein L8 CG1263-PA, isoform A [Apis mellifera]	257	358	2	63	181	465	2e-56	68.07	85.71
Locus_4465_Transcript_1/1_Confidence_1.000	334	amel|XP_393709 | OG5_133972 | PREDICTED: similar to CG8669-PA, isoform A [Apis mellifera]	357	98	313	285	356	213	2e-19	59.72	80.56
Locus_8885_Transcript_1/1_Confidence_1.000	361	amel|XP_394220 | OG5_126713 | PREDICTED: similar to CG9518-PA [Apis mellifera]	625	205	2	57	124	218	3e-19	61.76	75
Locus_31327_Transcript_1/1_Confidence_1.000	326	amel|XP_394758 | OG5_128738 | PREDICTED: similar to Muscle LIM protein at 84B CG1019-PA, isoform A isoform 1 [Apis mellifera]	500	1	324	325	436	316	2e-33	63.39	72.32
Locus_13917_Transcript_1/1_Confidence_1.000	463	amel|XP_395728 | OG5_127262 | PREDICTED: similar to Ribosomal protein L27 CG4759-PA isoform 1 [Apis mellifera]	134	432	31	1	134	543	3e-69	74.63	91.04
Locus_24665_Transcript_1/1_Confidence_1.000	798	amel|XP_396057 | OG5_126795 | PREDICTED: similar to poly A binding protein, cytoplasmic 1 isoform 1 [Apis mellifera]	630	797	3	143	414	813	9e-102	64.34	79.41
Locus_18951_Transcript_1/1_Confidence_1.000	825	amel|XP_396741 | OG5_126852 | PREDICTED: similar to 40S ribosomal protein S3a (C3 protein) [Apis mellifera]	267	82	813	23	267	1019	2e-137	76.73	86.94
Locus_50623_Transcript_1/1_Confidence_1.000	271	amel|XP_396914 | OG5_126900 | PREDICTED: similar to Ribosomal protein L17 CG3203-PD, isoform D [Apis mellifera]	185	242	3	4	83	285	6e-31	65	78.75
Locus_5904_Transcript_1/1_Confidence_1.000	265	amel|XP_623050 | OG5_126890 | PREDICTED: similar to Ribosomal protein S4 CG11276-PA, isoform A isoform 1 [Apis mellifera]	262	249	1	1	83	408	2e-48	92.77	97.59
Locus_31189_Transcript_1/1_Confidence_1.000	288	amel|XP_623050 | OG5_126890 | PREDICTED: similar to Ribosomal protein S4 CG11276-PA, isoform A isoform 1 [Apis mellifera]	262	3	203	185	251	305	5e-33	80.6	91.04
Locus_38916_Transcript_1/1_Confidence_1.000	275	amel|XP_623050 | OG5_126890 | PREDICTED: similar to Ribosomal protein S4 CG11276-PA, isoform A isoform 1 [Apis mellifera]	262	1	273	105	181	234	8e-23	52.75	63.74
Locus_29637_Transcript_1/1_Confidence_1.000	290	amel|XP_623169 | OG5_126951 | PREDICTED: similar to Qm CG17521-PA, isoform A isoform 2 [Apis mellifera]	219	30	290	1	87	365	3e-42	77.01	83.91
Locus_28223_Transcript_1/1_Confidence_1.000	282	amel|XP_623298 | OG5_127228 | PREDICTED: similar to Tropomyosin 1 CG4898-PA, isoform A [Apis mellifera]	251	1	117	213	251	165	2e-13	87.18	92.31
Locus_28344_Transcript_1/1_Confidence_1.000	420	amel|XP_623372 | OG5_129294 | PREDICTED: similar to spaghetti squash CG3595-PA isoform 1 [Apis mellifera]	174	115	420	1	102	504	5e-63	93.14	97.06
Locus_23774_Transcript_1/1_Confidence_1.000	737	amel|XP_623491 | OG5_158708 | PREDICTED: similar to CG12164-PA isoform 2 [Apis mellifera]	581	737	120	363	568	421	2e-45	68.93	82.04
Locus_32770_Transcript_1/1_Confidence_1.000	262	amel|XP_623723 | OG5_139093 | PREDICTED: similar to LDLa domain containing chitin binding protein 1 CG8756-PC, isoform C isoform 1 [Apis mellifera]	549	2	262	93	179	422	3e-48	88.51	96.55
Locus_2733_Transcript_1/1_Confidence_1.000	1890	amel|XP_624139 | OG5_130765 | PREDICTED: similar to like-glycosyltransferase [Apis mellifera]	712	1	777	423	653	326	1e-29	31.66	50.19
Locus_12764_Transcript_1/1_Confidence_1.000	1086	amel|XP_624293 | OG5_127215 | PREDICTED: similar to lethal (2) k05713 CG8256-PC, isoform C [Apis mellifera]	720	1085	213	430	720	1255	3e-165	79.38	89.35
Locus_36665_Transcript_1/1_Confidence_1.000	311	amel|XP_624821 | OG5_126874 | PREDICTED: similar to Ribosomal protein L3 CG4863-PA, isoform A [Apis mellifera]	415	1	309	252	354	479	4e-57	80.58	90.29
Locus_31772_Transcript_1/1_Confidence_1.000	273	amel|XP_625050 | OG5_130025 | PREDICTED: similar to CG4169-PA [Apis mellifera]	442	30	272	245	325	133	2e-08	41.98	55.56
Locus_65264_Transcript_1/1_Confidence_1.000	583	anid|AN0316 | OG5_126605 | Verified ORF; Alpha-tubulin, forms a heterodimer with beta-tubulin that promotes microtubule assembly	449	2	583	229	422	914	3e-120	92.78	96.39
Locus_41510_Transcript_1/1_Confidence_1.000	289	anid|AN0445 | OG5_127033 | Uncharacterized ORF; Ortholog of <i>S. cerevisiae</i> RPL15A and RPL15B	242	60	251	38	101	315	1e-34	90.62	96.88
Locus_54301_Transcript_1/1_Confidence_1.000	685	anid|AN0465 | OG5_127039 | Uncharacterized ORF; Ortholog of <i>S. cerevisiae</i> RPS8A and RPS8B	201	2	529	27	201	766	8e-101	79.55	90.91
Locus_62540_Transcript_1/1_Confidence_1.000	262	anid|AN0471 | OG5_128780 | Uncharacterized ORF; Putative vacuolar H+/Ca2+ exchanger	434	2	226	354	428	296	5e-31	73.33	81.33
Locus_47685_Transcript_1/1_Confidence_1.000	312	anid|AN0494 | OG5_134276 | Verified ORF; Protein with cellulose 1,4-beta-cellobiosidase activity, involved in degradation of glucans	530	220	41	24	83	147	5e-10	58.33	71.67
Locus_50653_Transcript_1/1_Confidence_1.000	579	anid|AN0570 | OG5_126931 | Uncharacterized ORF; <I>S. cerevisiae</I> ortholog RPL26A has RNA binding, structural constituent of ribosome, has role in translation and localizes to cytosolic large ribosomal subunit	134	540	142	2	134	534	2e-67	77.44	87.97
Locus_53439_Transcript_1/1_Confidence_1.000	263	anid|AN0687 | OG5_127074 | Verified ORF; Putative spermine or spermidine synthase with a predicted role in arginine metabolism; transcript upregulated in response to camptothecin	292	1	189	229	291	281	2e-29	77.78	90.48
Locus_32098_Transcript_1/1_Confidence_1.000	420	anid|AN0732 | OG5_136523 | Uncharacterized ORF; Putative transporter of the major facilitator superfamily (MFS); expression upregulated after exposure to farnesol	592	3	419	249	385	471	5e-54	64.03	81.29
Locus_34441_Transcript_1/1_Confidence_1.000	443	anid|AN0734 | OG5_126573 | Uncharacterized ORF; Histone H4.1, core histone protein; nearly identical to histone H4.2	103	140	373	22	99	393	4e-47	100	100
Locus_61584_Transcript_1/1_Confidence_1.000	414	anid|AN0747 | OG5_127023 | Uncharacterized ORF; Putative ubiquinol-cytochrome-c reductase subunit with a predicted role in energy metabolism; protein expressed at increased levels in a hapX mutant versus wild-type	479	3	413	270	406	608	4e-75	81.02	91.97
Locus_53672_Transcript_1/1_Confidence_1.000	249	anid|AN0771 | OG5_126574 | Uncharacterized ORF; Putative ABC multidrug transporter; confers resistance to azole antifungal drugs	1499	14	247	1222	1299	366	2e-39	82.05	94.87
Locus_59712_Transcript_1/1_Confidence_1.000	508	anid|AN0778 | OG5_146732 | Uncharacterized ORF	301	471	313	146	196	174	2e-13	61.11	79.63
Locus_48497_Transcript_1/1_Confidence_1.000	274	anid|AN0896 | OG5_129488 | Uncharacterized ORF; Putative succinate dehydrogenase	167	44	274	26	102	303	9e-34	68.83	85.71
Locus_25438_Transcript_1/1_Confidence_1.000	305	anid|AN10197 | OG5_137470 | Uncharacterized ORF	342	126	1	48	90	114	6e-06	62.79	67.44
Locus_37813_Transcript_1/1_Confidence_1.000	788	anid|AN10202 | OG5_126588 | Uncharacterized ORF	390	788	342	242	390	581	6e-70	81.88	94.63
Locus_58797_Transcript_1/1_Confidence_1.000	381	anid|AN10352 | OG5_127848 | Uncharacterized ORF; <I>S. cerevisiae</I> ortholog NOP56 has role in rRNA processing and localizes to 90S preribosome, small-subunit processome, box C/D snoRNP complex	510	3	371	244	366	509	2e-60	78.05	89.43
Locus_61064_Transcript_1/1_Confidence_1.000	317	anid|AN1037 | OG5_129048 | Verified ORF; Oleate delta-12 desaturase; transcriptionally regulated by low temperature and by light	471	2	145	423	470	189	9e-16	68.75	79.17
Locus_63253_Transcript_1/1_Confidence_1.000	402	anid|AN1050 | OG5_139322 | Verified ORF; Putative 3-ketoacyl-CoA thiolase with a predicted role in fatty acid metabolism; protein is mislocalized in a pexG mutant	417	401	3	224	356	529	6e-64	72.18	87.22
Locus_72546_Transcript_1/1_Confidence_1.000	379	anid|AN1050 | OG5_139322 | Verified ORF; Putative 3-ketoacyl-CoA thiolase with a predicted role in fatty acid metabolism; protein is mislocalized in a pexG mutant	417	119	379	3	89	295	3e-30	60.92	80.46
Locus_43548_Transcript_1/1_Confidence_1.000	389	anid|AN10614 | OG5_128646 | Uncharacterized ORF; <I>S. cerevisiae</I> ortholog STM1 has role in TOR signaling cascade, regulation of translational initiation in response to stress, anti-apoptosis, translational elongation, telomere maintenance	296	140	268	1	43	191	2e-16	79.07	88.37
Locus_61056_Transcript_1/1_Confidence_1.000	264	anid|AN10712 | OG5_128232 | Uncharacterized ORF	197	203	6	34	99	295	3e-32	83.33	89.39
Locus_61224_Transcript_1/1_Confidence_1.000	269	anid|AN10718 | OG5_128902 | Verified ORF; 6,7-mimethyl-8-ribityl-lumazine synthase; intracellular; protein abundance decreased by menadione stress	207	25	267	1	81	276	2e-29	61.73	81.48
Locus_3526_Transcript_1/1_Confidence_1.000	3035	anid|AN10822 | OG5_128433 | Uncharacterized ORF	504	494	925	258	386	177	3e-11	28.77	47.26
Locus_46133_Transcript_1/1_Confidence_1.000	261	anid|AN10834 | no_group | Uncharacterized ORF; Protein with an acyl-CoA dehydrogenase domain	488	75	260	8	69	250	2e-24	74.19	85.48
Locus_7141_Transcript_1/1_Confidence_1.000	582	anid|AN10996 | OG5_130034 | Uncharacterized ORF	512	215	568	56	181	188	1e-14	36.51	48.41
Locus_52889_Transcript_1/1_Confidence_1.000	317	anid|AN11303 | OG5_139483 | Uncharacterized ORF; <I>S. cerevisiae</I> ortholog TIM11 has structural molecule activity and has role in ATP synthesis coupled proton transport, cristae formation, protein oligomerization	92	270	7	1	87	187	3e-17	46.07	60.67
Locus_65770_Transcript_1/1_Confidence_1.000	251	anid|AN1138 | OG5_133184 | Verified ORF; Putative quinate permease with a predicted role in quinic acid utilization; mutants fail to grow on quinic acid as a sole carbon source at pH 6.5	536	250	2	327	408	307	2e-32	67.47	79.52
Locus_65260_Transcript_1/1_Confidence_1.000	361	anid|AN11444 | OG5_139484 | Uncharacterized ORF; <I>S. cerevisiae</I> ortholog ATP18 has hydrogen ion transporting ATP synthase activity, rotational mechanism and has role in ATP synthesis coupled proton transport	58	53	196	4	51	173	3e-15	64.58	83.33
Locus_72430_Transcript_1/1_Confidence_1.000	332	anid|AN1182 | OG5_126611 | Verified ORF; Beta-tubulin, highly conserved component of microtubules; <I>A. nidulans</I> has two beta-tubulin genes, benA and tubC; temperature sensitive mutants are blocked in mitosis and in nuclear division	447	71	331	1	87	465	1e-54	97.7	100
Locus_27698_Transcript_1/1_Confidence_1.000	441	anid|AN1222 | OG5_126734 | Verified ORF; Putative S-adenosylmethionine synthetase with a predicted role in methionine metabolism; expression reduced after exposure to farnesol	388	440	3	86	231	549	5e-67	89.73	95.21
Locus_10308_Transcript_1/1_Confidence_1.000	1114	anid|AN1291 | OG5_163708 | Uncharacterized ORF	163	136	615	3	160	310	1e-31	43.83	59.26
Locus_57160_Transcript_1/1_Confidence_1.000	256	anid|AN1429 | OG5_126713 | Verified ORF; Putative choline oxidase; intracellular, menadione stress-induced protein	542	256	2	206	290	339	7e-37	72.94	83.53
Locus_59570_Transcript_1/1_Confidence_1.000	285	anid|AN1429 | OG5_126713 | Verified ORF; Putative choline oxidase; intracellular, menadione stress-induced protein	542	3	284	300	393	462	8e-54	86.17	93.62
Locus_62776_Transcript_1/1_Confidence_1.000	325	anid|AN1534 | OG5_136382 | Uncharacterized ORF; Putative F1F0-ATPase complex subunit with a predicted role in energy metabolism	242	325	89	163	241	316	1e-34	77.22	92.41
Locus_61182_Transcript_1/1_Confidence_1.000	350	anid|AN1602 | OG5_169436 | Verified ORF; Putative beta-1,4-endoglucanase; protein with cellulase activity, involved in degradation of glucans	357	1	348	100	213	372	9e-42	61.34	73.95
Locus_69025_Transcript_1/1_Confidence_1.000	361	anid|AN1602 | OG5_169436 | Verified ORF; Putative beta-1,4-endoglucanase; protein with cellulase activity, involved in degradation of glucans	357	237	1	1	80	177	3e-14	52.5	76.25
Locus_62701_Transcript_1/1_Confidence_1.000	573	anid|AN1652 | OG5_146794 | Uncharacterized ORF; Putative zinc-finger transcription factor; induced under high-salt conditions	580	70	561	142	337	188	1e-14	42.13	54.82
Locus_56979_Transcript_1/1_Confidence_1.000	881	anid|AN1659 | OG5_149506 | Uncharacterized ORF; Putative amino acid transporter; transcript is induced by nitrate	467	880	77	192	466	826	3e-105	66.18	80.36
Locus_62694_Transcript_1/1_Confidence_1.000	294	anid|AN1659 | OG5_149506 | Uncharacterized ORF; Putative amino acid transporter; transcript is induced by nitrate	467	2	292	110	206	436	1e-50	83.51	92.78
Locus_59862_Transcript_1/1_Confidence_1.000	1167	anid|AN1918 | OG5_128435 | Verified ORF; Putative phosphoenolpyruvate carboxykinase with a predicted role in gluconeogenesis and glycolysis; transcriptionally induced by acetate and after exposure to farnesol	600	1166	3	134	521	1897	0	89.69	94.59
Locus_49913_Transcript_1/1_Confidence_1.000	341	anid|AN1952 | OG5_155847 | Uncharacterized ORF	163	220	17	4	74	142	3e-10	47.95	64.38
Locus_72373_Transcript_1/1_Confidence_1.000	274	anid|AN1993 | OG5_126737 | Uncharacterized ORF; Putative aspartate transaminase with a predicted role in alanine, aspartate, and aromatic amino acid metabolism	429	1	273	281	371	445	3e-52	87.91	95.6
Locus_72102_Transcript_1/1_Confidence_1.000	252	anid|AN2009 | OG5_135048 | Uncharacterized ORF	604	242	3	437	514	140	3e-09	45	61.25
Locus_71841_Transcript_1/1_Confidence_1.000	338	anid|AN2217 | OG5_129218 | Uncharacterized ORF; Putative beta-1,4-xylosidase with a predicted role in polysaccharide degradation	779	1	336	439	550	303	1e-30	65.79	78.07
Locus_52637_Transcript_1/1_Confidence_1.000	630	anid|AN2251 | OG5_137002 | Uncharacterized ORF	499	628	2	194	403	668	2e-82	67.62	80.48
Locus_65221_Transcript_1/1_Confidence_1.000	285	anid|AN2316 | OG5_135290 | Uncharacterized ORF; Putative cytochrome c oxidase subunit with a predicted role in energy metabolism	197	142	285	38	87	155	4e-12	66	72
Locus_72191_Transcript_1/1_Confidence_1.000	308	anid|AN2343 | OG5_133137 | Verified ORF; Putative nitroreductase; intracellular, menadione stress-induced protein	215	112	294	13	73	166	2e-13	67.21	83.61
Locus_68805_Transcript_1/1_Confidence_1.000	486	anid|AN2426 | OG5_126573 | Uncharacterized ORF; Histone H4.2, core histone protein; nearly identical to histone H4.1	103	134	379	22	103	413	7e-50	98.78	100
Locus_59465_Transcript_1/1_Confidence_1.000	369	anid|AN2436 | OG5_129655 | Verified ORF; Putative ATP citrate synthase with a predicted role in TCA intermediate metabolism; transcript downregulated upon shift from glucose to ethanol and after exposure to farnesol	655	369	1	461	583	626	3e-76	95.12	100
Locus_62433_Transcript_1/1_Confidence_1.000	412	anid|AN2731 | OG5_126883 | Uncharacterized ORF; <I>S. cerevisiae</I> ortholog YDJ1 has role in protein targeting to mitochondrion, protein targeting to ER, de novo protein folding, ER-associated protein catabolic process, protein refolding	412	408	64	306	412	332	3e-35	62.07	71.55
Locus_72426_Transcript_1/1_Confidence_1.000	378	anid|AN2789 | no_group | Uncharacterized ORF	281	215	3	21	90	194	7e-17	54.93	70.42
Locus_61481_Transcript_1/1_Confidence_1.000	369	anid|AN2855 | OG5_136549 | Verified ORF; C2H2 finger domain transcription factor; undergoes proteolytic activation in response to alkaline ambient pH; physically interacts with PalA by two-hybrid analysis	674	1	348	62	177	534	6e-63	80.17	87.07
Locus_57074_Transcript_1/1_Confidence_1.000	295	anid|AN3112 | OG5_133772 | Verified ORF; UDP-galactopyranose mutase, converts UDP-galactopyranose into UDP-galactofuranose; involved in cell wall biogenesis	532	23	295	1	89	379	5e-42	80.22	91.21
Locus_28995_Transcript_1/1_Confidence_1.000	405	anid|AN3113 | OG5_132427 | Uncharacterized ORF	400	148	2	41	89	193	4e-16	73.47	85.71
Locus_64209_Transcript_1/1_Confidence_1.000	621	anid|AN3592 | OG5_128393 | Uncharacterized ORF; Putative calnexin with a predicted role in protein folding and protein quality control on the endoplasmic reticulum (ER) membrane	561	621	1	294	499	627	6e-76	68.6	82.13
Locus_60306_Transcript_1/1_Confidence_1.000	329	anid|AN3725 | OG5_137937 | Uncharacterized ORF; Developmentally regulated protein with similarity to <i>Candida albicans</i> Wh11p; transcription is repressed by StuA; expression upregulated after exposure to farnesol	89	328	113	18	89	183	2e-16	52.78	69.44
Locus_1983_Transcript_1/1_Confidence_1.000	1207	anid|AN3777 | OG5_155703 | Verified ORF; Protein with beta-(1,6)-glucanase activity, involved in degradation of glucans	409	5	976	84	397	883	8e-113	52	64.62
Locus_4225_Transcript_1/1_Confidence_1.000	4268	anid|AN3777 | OG5_155703 | Verified ORF; Protein with beta-(1,6)-glucanase activity, involved in degradation of glucans	409	1007	2119	45	409	1084	4e-132	53.1	68.19
Locus_61775_Transcript_1/1_Confidence_1.000	249	anid|AN3795 | OG5_137941 | Uncharacterized ORF	419	77	247	1	56	135	8e-09	50.88	68.42
Locus_63335_Transcript_1/1_Confidence_1.000	351	anid|AN3795 | OG5_137941 | Uncharacterized ORF	419	1	342	247	360	194	2e-16	41.23	59.65
Locus_57123_Transcript_1/1_Confidence_1.000	440	anid|AN4060 | OG5_127080 | Uncharacterized ORF; Putative ribosomal protein S16	148	77	439	1	121	535	5e-68	87.6	96.69
Locus_19172_Transcript_1/1_Confidence_1.000	665	anid|AN4073 | OG5_127261 | Uncharacterized ORF; Putative cytosolic small ribosomal subunit protein S12; expression reduced after exposure to farnesol	150	664	212	1	150	619	2e-79	82.12	87.42
Locus_58948_Transcript_1/1_Confidence_1.000	425	anid|AN4103 | OG5_187763 | Uncharacterized ORF	529	424	2	173	312	324	7e-34	46.1	65.25
Locus_62287_Transcript_1/1_Confidence_1.000	356	anid|AN4103 | OG5_187763 | Uncharacterized ORF	529	2	352	307	423	310	3e-32	55.46	70.59
Locus_43759_Transcript_1/1_Confidence_1.000	269	anid|AN4159 | OG5_127569 | Verified ORF; Putative glutamate-ammonia ligase with a predicted role in glutamate and glutamine metabolism; intracellular; transcript upregulated by nitrate limitation; protein abundance decreased by menadione stress	357	1	117	319	357	157	7e-12	74.36	84.62
Locus_62656_Transcript_1/1_Confidence_1.000	401	anid|AN4299 | OG5_152792 | Uncharacterized ORF	151	400	2	15	147	525	9e-67	79.7	86.47
Locus_71959_Transcript_1/1_Confidence_1.000	272	anid|AN4525 | OG5_129154 | Uncharacterized ORF; Putative cytochrome c oxidase subunit with a predicted role in energy metabolism	194	2	181	134	193	126	4e-08	53.33	75
Locus_72569_Transcript_1/1_Confidence_1.000	320	anid|AN4683 | OG5_128922 | Uncharacterized ORF; Putative oligosaccharyltransferase beta subunit; ortholog of <I>S. cerevisiae</I> Wbp1p	460	1	318	277	377	286	2e-29	53.7	68.52
Locus_58404_Transcript_1/1_Confidence_1.000	260	anid|AN4762 | OG5_159321 | Uncharacterized ORF	144	57	260	36	106	151	9e-12	53.52	64.79
Locus_63880_Transcript_1/1_Confidence_1.000	278	anid|AN4942 | OG5_127878 | Uncharacterized ORF; <I>S. cerevisiae</I> ortholog NTF2 has Ran GTPase binding, has role in protein import into nucleus and localizes to nuclear envelope	125	274	2	22	114	258	2e-27	59.14	75.27
Locus_72543_Transcript_1/1_Confidence_1.000	288	anid|AN5056 | OG5_163662 | Uncharacterized ORF	71	238	26	1	71	235	1e-24	69.01	77.46
Locus_38578_Transcript_1/1_Confidence_1.000	635	anid|AN5222 | OG5_126986 | Uncharacterized ORF; Ortholog of <i>S. cerevisiae</i> RPS11B and RPS11A	160	2	454	9	160	673	1e-87	84.21	89.47
Locus_72540_Transcript_1/1_Confidence_1.000	251	anid|AN5373 | OG5_141116 | Uncharacterized ORF	274	5	217	203	274	212	7e-20	59.72	76.39
Locus_72229_Transcript_1/1_Confidence_1.000	258	anid|AN5626 | OG5_126680 | Verified ORF; Acetyl-CoA synthase, required for utilization of acetate as a carbon source; transcriptional induction by acetate is mediated by FacB; carbon catabolite repression is mediated by CreA	670	236	9	1	76	275	2e-27	70.13	81.82
Locus_54665_Transcript_1/1_Confidence_1.000	372	anid|AN5715 | OG5_127138 | Uncharacterized ORF; Putative 40s ribosomal protein S26; ortholog of <I>S. cerevisiae</I> Rps26Bp which has role in rRNA export from nucleus; expression reduced after exposure to farnesol	119	39	350	1	100	371	5e-44	65.38	80.77
Locus_48314_Transcript_1/1_Confidence_1.000	360	anid|AN5740 | OG5_128099 | Verified ORF; Protein with similarity to Saccharomyces cerevisiae Rho family GTPase Rho1p; involved in polar growth, hyphal branching, and cell wall synthesis	193	2	289	98	193	422	8e-51	84.38	90.62
Locus_53338_Transcript_1/1_Confidence_1.000	283	anid|AN6010 | OG5_126744 | Verified ORF; Hsp70-family protein; required for conidial germination; protein expressed at increased levels during osmoadaptation	666	283	5	105	197	454	3e-52	87.1	96.77
Locus_32330_Transcript_1/1_Confidence_1.000	769	anid|AN6083 | OG5_126951 | Uncharacterized ORF; <I>S. cerevisiae</I> ortholog RPL10 has role in translational termination, ribosomal large subunit assembly	221	13	675	1	221	1033	1e-140	85.52	94.12
Locus_62637_Transcript_1/1_Confidence_1.000	305	anid|AN6195 | OG5_135768 | Verified ORF; Transcriptional regulator that mediates carbon catabolite repression; mutants display increased extracellular protease activity	416	305	45	331	415	217	6e-20	57.95	71.59
Locus_4464_Transcript_1/1_Confidence_1.000	262	anid|AN6330 | OG5_126923 | Verified ORF; Putative elongation factor 2; intracellular; protein abundance decreased by menadione stress	844	220	2	1	73	303	5e-31	78.08	90.41
Locus_53657_Transcript_1/1_Confidence_1.000	796	anid|AN6330 | OG5_126923 | Verified ORF; Putative elongation factor 2; intracellular; protein abundance decreased by menadione stress	844	795	1	491	755	1307	3e-173	90.57	96.23
Locus_72230_Transcript_1/1_Confidence_1.000	263	anid|AN6330 | OG5_126923 | Verified ORF; Putative elongation factor 2; intracellular; protein abundance decreased by menadione stress	844	6	119	807	844	147	4e-10	76.32	84.21
Locus_71990_Transcript_1/1_Confidence_1.000	297	anid|AN6525 | OG5_131694 | Verified ORF; Putative formate dehydrogenase with a predicted role in oxalic acid metabolism; intracellular; protein abundance decreased by menadione stress; inducible by acetate; expression reduced after exposure to farnesol	365	297	1	104	202	480	7e-58	91.92	94.95
Locus_72308_Transcript_1/1_Confidence_1.000	484	anid|AN6525 | OG5_131694 | Verified ORF; Putative formate dehydrogenase with a predicted role in oxalic acid metabolism; intracellular; protein abundance decreased by menadione stress; inducible by acetate; expression reduced after exposure to farnesol	365	132	482	1	117	531	2e-64	87.18	94.02
Locus_32582_Transcript_1/2_Confidence_1.000	389	anid|AN6542 | OG5_126595 | Verified ORF; Gamma-actin	375	1	387	91	219	684	1e-87	100	100
Locus_32582_Transcript_2/2_Confidence_1.000	388	anid|AN6542 | OG5_126595 | Verified ORF; Gamma-actin	375	3	386	92	219	677	9e-87	100	100
Locus_57681_Transcript_1/1_Confidence_1.000	370	anid|AN6542 | OG5_126595 | Verified ORF; Gamma-actin	375	87	368	1	94	517	7e-63	100	100
Locus_59831_Transcript_1/1_Confidence_1.000	266	anid|AN6642 | OG5_128979 | Uncharacterized ORF; Putative potassium-transporting ATPase with a predicted role in energy metabolism	1066	266	3	666	753	382	2e-41	79.55	92.05
Locus_52521_Transcript_1/1_Confidence_1.000	256	anid|AN6651 | OG5_129819 | Uncharacterized ORF; <I>S. cerevisiae</I> ortholog NEW1 has role in ribosomal small subunit biogenesis and localizes to mitochondrion, polysome	1118	2	256	637	721	429	5e-48	88.24	92.94
Locus_72340_Transcript_1/1_Confidence_1.000	296	anid|AN6688 | OG5_129485 | Verified ORF; Putative septin B; localizes to septa during early septum formation and to branch points during vegetative growth; localizes to the vesicle/metula, the metula/phialide and the phialide/conidium interfaces during conidiophore development	459	296	150	411	459	227	4e-21	91.84	100
Locus_62957_Transcript_1/1_Confidence_1.000	306	anid|AN7254 | OG5_126926 | Verified ORF; Protein with a conserved CDC48, cell division protein N-terminal domain and two ATPase domains of the AAA-superfamily; protein expressed at increased levels during osmoadaptation	814	305	3	397	497	508	3e-59	95.05	99.01
Locus_59154_Transcript_1/1_Confidence_1.000	341	anid|AN7402 | OG5_135115 | Uncharacterized ORF; Putative glucoamylase with a predicted role in starch metabolism	634	5	337	455	614	291	2e-29	42.5	51.88
Locus_71839_Transcript_1/1_Confidence_1.000	403	anid|AN8149 | OG5_136987 | Verified ORF; Protein with alpha-fucosidase activity, involved in degradation of xyloglucans	809	401	3	533	664	454	3e-51	61.65	76.69
Locus_57980_Transcript_1/1_Confidence_1.000	1548	anid|AN8269 | OG5_126623 | Uncharacterized ORF; 90 kilodalton heat shock protein; physically associates with importin-alpha, KapA	700	124	1545	1	475	1934	0	87.37	94.95
Locus_63103_Transcript_1/1_Confidence_1.000	317	anid|AN8275 | OG5_127570 | Verified ORF; Mitochondrial citrate synthase with a predicted role in the TCA cycle	474	316	2	190	294	514	1e-61	88.57	97.14
Locus_62009_Transcript_1/1_Confidence_1.000	446	anid|AN8333 | OG5_155754 | Verified ORF; Protein required for normal phialide development; expression increased in the presence of bafilomycin B1 and concanamycin A; PhiA localizes to conidia and phialides	182	261	4	24	111	177	2e-14	44.94	61.8
Locus_62248_Transcript_1/1_Confidence_1.000	273	anid|AN8333 | OG5_155754 | Verified ORF; Protein required for normal phialide development; expression increased in the presence of bafilomycin B1 and concanamycin A; PhiA localizes to conidia and phialides	182	269	45	110	182	140	4e-10	39.47	60.53
Locus_71861_Transcript_1/1_Confidence_1.000	340	anid|AN8445 | OG5_133965 | Uncharacterized ORF; Putative aminopeptidase Y; transcript is induced by nitrate	503	2	340	301	413	352	3e-38	60.18	72.57
Locus_62038_Transcript_1/1_Confidence_1.000	371	anid|AN8793 | OG5_129614 | Uncharacterized ORF; Putative succinate dehydrogenase (ubiquinone) with a predicted role in the TCA cycle	191	371	147	116	190	158	3e-12	56	77.33
Locus_72623_Transcript_1/1_Confidence_1.000	284	anid|AN8903 | OG5_126717 | Uncharacterized ORF; Putative peptide transporter; transcript upregulated by nitrate limitation	628	272	75	52	116	197	8e-17	59.09	74.24
Locus_72066_Transcript_1/1_Confidence_1.000	301	anid|AN9383 | OG5_138585 | Uncharacterized ORF; Putative unsaturated rhamnogalacturonan hydrolase	378	301	2	169	268	326	3e-35	59	73
Locus_62339_Transcript_1/1_Confidence_1.000	493	anid|AN9403 | OG5_127524 | Verified ORF; Putative pyruvate dehydrogenase (lipoamide) with a predicted role in pyruvate metabolism	375	3	491	59	221	757	4e-98	92.02	97.55
Locus_59339_Transcript_1/1_Confidence_1.000	388	anid|AN9470 | OG5_131320 | Verified ORF; Putative urate oxidase; regulated by UaY and AreA	301	96	383	1	96	360	3e-40	65.62	83.33
Locus_58114_Transcript_1/1_Confidence_1.000	942	aory|AO090001000224 | OG5_129048 | fatty acid desaturase	466	14	940	89	397	1211	6e-163	75.73	88.35
Locus_60540_Transcript_1/1_Confidence_1.000	693	aory|AO090001000305 | OG5_126717 | H+/oligopeptide symporter	588	2	610	366	570	700	5e-86	62.93	79.02
Locus_60102_Transcript_1/1_Confidence_1.000	671	aory|AO090001000447 | OG5_147012 | choline dehydrogenase and related flavoproteins	701	7	669	1	235	1028	8e-134	86.38	90.21
Locus_64701_Transcript_1/1_Confidence_1.000	294	aory|AO090003000003 | OG5_126842 | glucosamine 6-phosphate synthetases, contain amidotransferase and phosphosugar isomerase domains	693	1	294	518	615	418	4e-47	82.65	90.82
Locus_60170_Transcript_1/1_Confidence_1.000	661	aory|AO090003000018 | OG5_163550 | predicted protein	198	659	54	2	198	436	2e-51	44.33	63.05
Locus_53931_Transcript_1/1_Confidence_1.000	356	aory|AO090003000053 | OG5_126706 | multifunctional chaperone (14-3-3 family)	273	350	3	84	199	524	4e-65	94.83	98.28
Locus_61921_Transcript_1/1_Confidence_1.000	355	aory|AO090003000055 | OG5_126698 | enolase	438	351	1	152	268	559	2e-68	88.89	95.73
Locus_63969_Transcript_1/1_Confidence_1.000	329	aory|AO090003000055 | OG5_126698 | enolase	438	2	328	263	371	465	8e-55	85.32	94.5
Locus_60000_Transcript_1/1_Confidence_1.000	399	aory|AO090003000077 | OG5_159560 | predicted transporter (major facilitator superfamily)	534	3	398	238	369	532	2e-63	71.21	84.09
Locus_55787_Transcript_1/1_Confidence_1.000	483	aory|AO090003000121 | OG5_127175 | 6-phosphogluconate dehydrogenase	491	483	73	355	491	656	1e-81	87.59	91.97
Locus_61614_Transcript_1/1_Confidence_1.000	263	aory|AO090003000270 | OG5_126967 | cytochrome b5	137	2	208	26	94	322	6e-37	86.96	92.75
Locus_55039_Transcript_1/1_Confidence_1.000	1860	aory|AO090003000415 | OG5_126691 | aconitase/homoaconitase (aconitase superfamily)	779	3	1688	215	775	2619	0	84.7	91.99
Locus_55236_Transcript_1/1_Confidence_1.000	951	aory|AO090003000443 | OG5_127724 | concentrative Na+-nucleoside cotransporter CNT1/CNT2	609	2	829	337	609	1088	3e-142	72.83	90.58
Locus_42835_Transcript_1/1_Confidence_1.000	562	aory|AO090003000454 | OG5_127514 | GTPase Ran/TC4/GSP1 (nuclear protein transport pathway), small G protein superfamily	214	445	2	2	149	766	2e-101	95.95	97.3
Locus_58526_Transcript_1/1_Confidence_1.000	381	aory|AO090003000546 | OG5_126912 | TATA-box binding protein (TBP), component of TFIID and TFIIIB	263	379	152	187	262	401	1e-46	98.68	98.68
Locus_57769_Transcript_1/1_Confidence_1.000	329	aory|AO090003000607 | OG5_136135 | predicted protein	122	1	219	24	95	255	9e-27	69.86	84.93
Locus_36999_Transcript_1/1_Confidence_1.000	422	aory|AO090003000679 | OG5_127221 | ubiquitin/40S ribosomal protein S27a fusion	154	2	307	53	154	355	6e-41	97.06	99.02
Locus_70733_Transcript_1/1_Confidence_1.000	326	aory|AO090003001112 | OG5_126680 | acyl-CoA synthetase	670	325	2	357	464	522	1e-61	86.11	95.37
Locus_60476_Transcript_1/1_Confidence_1.000	249	aory|AO090005000074 | OG5_126798 | predicted transporter (major facilitator superfamily)	530	248	3	172	253	309	1e-32	68.29	87.8
Locus_12239_Transcript_1/1_Confidence_1.000	1223	aory|AO090005000096 | OG5_176048 | predicted protein	257	123	890	1	254	802	1e-102	56.25	73.44
Locus_72205_Transcript_1/1_Confidence_1.000	264	aory|AO090005000374 | OG5_163750 | predicted protein	244	260	3	60	144	215	2e-20	51.16	65.12
Locus_71808_Transcript_1/1_Confidence_1.000	380	aory|AO090005000511 | no_group | predicted protein	116	111	380	4	93	365	4e-43	75.56	85.56
Locus_58560_Transcript_1/1_Confidence_1.000	599	aory|AO090005000531 | OG5_169436 | predicted protein	367	596	66	61	233	553	5e-67	59.55	73.6
Locus_71904_Transcript_1/1_Confidence_1.000	269	aory|AO090005000840 | OG5_126605 | alpha tubulin	448	2	268	9	97	462	1e-54	93.26	97.75
Locus_32182_Transcript_1/1_Confidence_1.000	320	aory|AO090005000897 | OG5_152643 | predicted protein	190	191	319	27	69	142	3e-10	65.12	72.09
Locus_72449_Transcript_1/1_Confidence_1.000	1038	aory|AO090005001192 | OG5_127220 | mitochondrial phosphate carrier protein	312	1037	261	54	312	1111	1e-149	83.4	88.8
Locus_72336_Transcript_1/1_Confidence_1.000	269	aory|AO090005001300 | OG5_129051 | phosphoglycerate mutase	520	269	3	340	428	365	2e-40	73.03	83.15
Locus_59612_Transcript_1/1_Confidence_1.000	251	aory|AO090005001461 | OG5_126984 | translation initiation factor 4F, helicase subunit (eIF-4A) and related helicases	421	250	77	364	421	231	4e-22	100	100
Locus_17661_Transcript_1/1_Confidence_1.000	488	aory|AO090005001614 | OG5_128642 | thioredoxin-like protein	223	253	477	25	99	254	5e-25	62.67	80
Locus_72162_Transcript_1/1_Confidence_1.000	378	aory|AO090009000104 | OG5_210987 | predicted protein	401	378	40	291	400	191	7e-16	34.51	58.41
Locus_72794_Transcript_1/1_Confidence_1.000	271	aory|AO090009000174 | OG5_127693 | 1,3-beta-glucan synthase/callose synthase catalytic subunit	1898	2	271	1328	1417	382	3e-41	74.44	84.44
Locus_72348_Transcript_1/1_Confidence_1.000	276	aory|AO090009000205 | OG5_138652 | predicted protein	322	211	11	33	99	161	2e-12	41.79	61.19
Locus_45648_Transcript_1/1_Confidence_1.000	625	aory|AO090009000264 | OG5_127516 | G protein beta subunit-like protein	316	3	461	164	316	781	8e-102	95.42	97.39
Locus_62047_Transcript_1/1_Confidence_1.000	293	aory|AO090009000269 | OG5_127569 | glutamine synthetase	356	256	2	1	85	335	1e-36	74.12	83.53
Locus_63892_Transcript_1/1_Confidence_1.000	310	aory|AO090009000459 | OG5_139094 | predicted protein	248	254	33	49	119	121	5e-07	44	65.33
Locus_42759_Transcript_1/1_Confidence_1.000	474	aory|AO090009000698 | OG5_126659 | 60s ribosomal protein L23	154	1	342	41	154	493	2e-61	81.58	91.23
Locus_63553_Transcript_1/1_Confidence_1.000	482	aory|AO090010000223 | OG5_126722 | 40S ribosomal protein S2/30S ribosomal protein S5	259	98	478	35	161	535	2e-66	92.91	97.64
Locus_61515_Transcript_1/1_Confidence_1.000	545	aory|AO090010000333 | OG5_129988 | permeases	571	1	543	150	331	729	2e-91	73.63	86.26
Locus_72144_Transcript_1/1_Confidence_1.000	272	aory|AO090010000333 | OG5_129988 | permeases	571	271	2	424	513	391	8e-44	83.33	91.11
Locus_61982_Transcript_1/1_Confidence_1.000	569	aory|AO090010000722 | OG5_128717 | catalase (peroxidase I)	751	1	486	591	750	588	4e-69	68.52	78.4
Locus_61475_Transcript_1/1_Confidence_1.000	369	aory|AO090010000745 | OG5_126875 | acetylcholinesterase/Butyrylcholinesterase	567	10	369	354	473	380	8e-42	65	80.83
Locus_71796_Transcript_1/1_Confidence_1.000	290	aory|AO090011000036 | OG5_142842 | predicted protein	634	290	99	571	634	252	4e-24	71.88	82.81
Locus_71919_Transcript_1/1_Confidence_1.000	359	aory|AO090011000036 | OG5_142842 | predicted protein	634	2	358	282	397	356	3e-38	63.03	72.27
Locus_72961_Transcript_1/1_Confidence_1.000	262	aory|AO090011000230 | OG5_133776 | mannitol-1-phosphate/altronate dehydrogenases	502	3	260	130	217	341	3e-37	71.59	81.82
Locus_27935_Transcript_1/1_Confidence_1.000	446	aory|AO090011000490 | OG5_126760 | 40S ribosomal protein S20	116	323	3	1	107	478	9e-60	83.18	90.65
Locus_51468_Transcript_1/1_Confidence_1.000	454	aory|AO090011000563 | OG5_126772 | ATP-dependent RNA helicase	554	2	454	243	393	724	2e-91	88.74	95.36
Locus_57634_Transcript_1/1_Confidence_1.000	455	aory|AO090011000588 | OG5_131320 | uricase (urate oxidase)	302	7	288	209	302	373	7e-42	71.28	84.04
Locus_64265_Transcript_1/1_Confidence_1.000	380	aory|AO090011000590 | OG5_126930 | 40S ribosomal protein S16	143	378	160	71	143	356	2e-41	90.41	98.63
Locus_71848_Transcript_1/1_Confidence_1.000	412	aory|AO090011000614 | OG5_126583 | aldo/keto reductase family proteins	312	411	1	59	193	506	9e-62	66.42	82.48
Locus_64950_Transcript_1/1_Confidence_1.000	268	aory|AO090011000648 | OG5_128530 | translation initiation factor 3, subunit g (eIF-3g)	287	199	5	1	66	148	7e-11	63.64	83.33
Locus_63759_Transcript_1/1_Confidence_1.000	377	aory|AO090011000685 | OG5_138449 | cytochrome P450 CYP3/CYP5/CYP6/CYP9 subfamilies	495	170	376	27	95	188	3e-15	53.62	66.67
Locus_70960_Transcript_1/1_Confidence_1.000	404	aory|AO090011000732 | no_group | predicted protein	616	218	6	17	91	170	1e-12	49.33	64
Locus_5222_Transcript_1/1_Confidence_1.000	1457	aory|AO090011000757 | OG5_155703 | predicted protein	406	75	1247	6	401	933	3e-119	46.08	60.29
Locus_58171_Transcript_1/1_Confidence_1.000	708	aory|AO090011000954 | OG5_127236 | 60s ribosomal protein L18	232	45	554	49	213	600	3e-75	73.53	86.47
Locus_62566_Transcript_1/1_Confidence_1.000	382	aory|AO090012000287 | OG5_169064 | reductases with broad range of substrate specificities	266	1	381	90	216	571	4e-72	79.53	92.13
Locus_72084_Transcript_1/1_Confidence_1.000	287	aory|AO090012000378 | OG5_138294 | glutathione S-transferase	231	286	26	145	231	194	3e-17	44.83	64.37
Locus_72735_Transcript_1/1_Confidence_1.000	265	aory|AO090012000402 | OG5_134930 | predicted protein	102	3	131	60	102	165	4e-14	72.09	83.72
Locus_58101_Transcript_1/1_Confidence_1.000	787	aory|AO090012000498 | OG5_155647 | predicted protein	717	768	1	440	678	484	1e-53	43.56	55.68
Locus_26345_Transcript_1/1_Confidence_1.000	917	aory|AO090012000613 | OG5_127090 | 60S ribosomal protein L5	300	27	917	1	297	1157	2e-157	75.42	86.2
Locus_57594_Transcript_1/1_Confidence_1.000	637	aory|AO090020000007 | OG5_126570 | histone 2A	133	479	123	15	133	491	2e-60	98.32	98.32
Locus_64109_Transcript_1/1_Confidence_1.000	298	aory|AO090020000122 | OG5_127384 | translation initiation factor 1 (eIF-1/SUI1)	114	296	3	6	101	371	2e-44	83.67	92.86
Locus_66767_Transcript_1/1_Confidence_1.000	327	aory|AO090020000122 | OG5_127384 | translation initiation factor 1 (eIF-1/SUI1)	114	34	327	1	96	374	8e-45	91.84	95.92
Locus_72324_Transcript_1/1_Confidence_1.000	404	aory|AO090020000195 | OG5_147028 | predicted protein	345	1	402	22	155	492	3e-59	67.16	81.34
Locus_59163_Transcript_1/1_Confidence_1.000	339	aory|AO090020000403 | OG5_127253 | plasma membrane H+-transporting ATPase	980	2	124	930	970	135	3e-08	58.54	78.05
Locus_65534_Transcript_1/1_Confidence_1.000	259	aory|AO090020000517 | OG5_128249 | subtilisin-related protease/Vacuolar protease B	495	23	259	303	377	159	7e-12	46.84	65.82
Locus_42129_Transcript_1/1_Confidence_1.000	842	aory|AO090023000252 | OG5_159299 | predicted protein	322	3	473	149	310	192	4e-15	32.73	50.3
Locus_22905_Transcript_1/1_Confidence_1.000	478	aory|AO090023000281 | OG5_132753 | Ras GTPases	200	275	478	3	70	206	3e-18	55.88	70.59
Locus_34847_Transcript_1/1_Confidence_1.000	1524	aory|AO090023000453 | OG5_169640 | permeases of the major facilitator superfamily	514	1476	55	39	512	1921	0	75.74	86.92
Locus_71969_Transcript_1/1_Confidence_1.000	981	aory|AO090023000454 | OG5_129733 | mitochondrial tricarboxylate/dicarboxylate carrier proteins	321	764	3	23	285	718	2e-90	66.16	76.05
Locus_72197_Transcript_1/1_Confidence_1.000	269	aory|AO090023000455 | OG5_211101 | uncharacterized protein conserved in bacteria	424	150	266	7	45	121	6e-07	56.41	71.79
Locus_60713_Transcript_1/1_Confidence_1.000	513	aory|AO090023000650 | OG5_146794 | predicted protein	608	512	144	486	606	328	1e-33	56.59	68.99
Locus_64293_Transcript_1/1_Confidence_1.000	256	aory|AO090023000801 | OG5_126626 | pyruvate carboxylase	1193	3	254	420	503	406	7e-45	85.71	92.86
Locus_18511_Transcript_1/1_Confidence_1.000	602	aory|AO090023000895 | OG5_127746 | porin/voltage-dependent anion-selective channel protein	346	3	602	141	338	629	1e-78	60	78
Locus_72270_Transcript_1/1_Confidence_1.000	267	aory|AO090026000138 | OG5_126955 | NADH-cytochrome b-5 reductase	265	3	266	51	138	398	7e-47	82.95	90.91
Locus_5369_Transcript_1/1_Confidence_1.000	1608	aory|AO090026000207 | OG5_149700 | permease of the major facilitator superfamily	508	402	1559	73	459	1005	7e-128	55.67	71.13
Locus_31665_Transcript_1/1_Confidence_1.000	324	aory|AO090026000458 | OG5_126874 | 60S ribosomal protein L3 and related proteins	392	2	319	91	196	355	4e-39	62.26	78.3
Locus_72286_Transcript_1/1_Confidence_1.000	306	aory|AO090026000537 | OG5_127353 | RAB proteins geranylgeranyltransferase component A (RAB escort protein)	467	208	2	1	71	318	8e-34	87.32	90.14
Locus_60114_Transcript_1/1_Confidence_1.000	331	aory|AO090026000708 | OG5_126613 | thioredoxin	110	132	326	1	65	190	2e-17	47.69	69.23
Locus_19874_Transcript_1/1_Confidence_1.000	2166	aory|AO090038000098 | OG5_127966 | squalene cyclase	673	76	2061	28	669	1405	0	43.13	61.64
Locus_39978_Transcript_1/1_Confidence_1.000	508	aory|AO090038000098 | OG5_127966 | squalene cyclase	673	507	10	367	543	290	3e-28	41.57	53.37
Locus_37761_Transcript_1/1_Confidence_1.000	519	aory|AO090038000249 | OG5_127114 | 60S ribosomal protein L10A	217	2	517	14	185	747	1e-98	86.63	95.93
Locus_57584_Transcript_1/1_Confidence_1.000	459	aory|AO090038000254 | OG5_126696 | GTP-binding ADP-ribosylation factor Arf1	183	119	457	1	113	591	8e-76	97.35	99.12
Locus_51069_Transcript_1/1_Confidence_1.000	696	aory|AO090038000357 | OG5_126734 | S-adenosylmethionine synthetase	390	695	399	292	390	451	3e-51	84.85	91.92
Locus_62577_Transcript_1/1_Confidence_1.000	294	aory|AO090038000417 | OG5_127233 | S-adenosylhomocysteine hydrolase	449	3	101	417	449	146	5e-10	78.79	90.91
Locus_54654_Transcript_1/1_Confidence_1.000	751	aory|AO090038000592 | OG5_126896 | 40S ribosomal protein S24	133	86	445	1	120	462	1e-55	81.67	89.17
Locus_36963_Transcript_1/1_Confidence_1.000	1129	aory|AO090103000007 | OG5_126588 | molecular chaperones HSP70/HSC70, HSP70 superfamily	614	86	1129	1	348	1605	0	89.08	95.4
Locus_59242_Transcript_1/1_Confidence_1.000	332	aory|AO090103000022 | OG5_126713 | choline dehydrogenase and related flavoproteins	542	332	3	379	488	547	7e-66	92.73	96.36
Locus_60816_Transcript_1/1_Confidence_1.000	309	aory|AO090103000022 | OG5_126713 | choline dehydrogenase and related flavoproteins	542	23	307	15	109	380	4e-42	87.37	93.68
Locus_61583_Transcript_1/1_Confidence_1.000	291	aory|AO090113000080 | OG5_127481 | HSP90 co-chaperone p23	212	287	114	64	121	231	1e-22	72.41	86.21
Locus_60690_Transcript_1/1_Confidence_1.000	328	aory|AO090113000163 | OG5_146856 | predicted acyl esterases	795	6	290	494	588	376	8e-41	71.58	83.16
Locus_60934_Transcript_1/1_Confidence_1.000	290	aory|AO090113000178 | OG5_129262 | predicted protein	239	6	221	166	237	195	2e-17	50	68.06
Locus_62800_Transcript_1/1_Confidence_1.000	471	aory|AO090113000178 | OG5_129262 | predicted protein	239	437	3	19	163	448	2e-53	55.86	67.59
Locus_21025_Transcript_1/1_Confidence_1.000	271	aory|AO090120000053 | OG5_127220 | mitochondrial phosphate carrier protein	315	124	270	13	61	247	2e-24	89.8	95.92
Locus_71817_Transcript_1/1_Confidence_1.000	263	aory|AO090120000080 | OG5_126631 | translation elongation factor EF-1 alpha/Tu	468	262	5	178	263	429	1e-49	91.86	96.51
Locus_59625_Transcript_1/1_Confidence_1.000	478	aory|AO090120000127 | OG5_155924 | predicted protein	584	476	93	350	477	297	1e-29	51.56	77.34
Locus_61532_Transcript_1/1_Confidence_1.000	342	aory|AO090120000127 | OG5_155924 | predicted protein	584	19	252	505	579	127	2e-07	33.33	53.85
Locus_26978_Transcript_1/1_Confidence_1.000	414	aory|AO090120000257 | OG5_126706 | multifunctional chaperone (14-3-3 family)	261	7	414	29	167	399	3e-46	65.47	80.58
Locus_59518_Transcript_1/1_Confidence_1.000	471	aory|AO090120000257 | OG5_126706 | multifunctional chaperone (14-3-3 family)	261	88	471	1	128	614	3e-78	91.41	96.09
Locus_72042_Transcript_1/1_Confidence_1.000	340	aory|AO090672000001 | OG5_139490 | predicted protein	161	112	2	32	68	115	1e-06	59.46	70.27
Locus_60941_Transcript_1/1_Confidence_1.000	304	aory|AO090701000063 | OG5_129364 | armadillo/beta-catenin-like repeat-containing protein	216	304	8	88	186	344	4e-39	62.63	80.81
Locus_6073_Transcript_1/1_Confidence_1.000	302	aory|AO090701000065 | OG5_126595 | actin and related proteins	257	302	39	170	257	456	2e-55	92.05	98.86
Locus_61683_Transcript_1/1_Confidence_1.000	721	aory|AO090701000065 | OG5_126595 | actin and related proteins	257	721	206	86	257	920	4e-123	100	100
Locus_53986_Transcript_1/1_Confidence_1.000	263	aory|AO090701000214 | OG5_128943 | multifunctional pyrimidine synthesis protein CAD (includes carbamoyl-phophate synthetase, aspartate transcarbamylase, and glutamine amidotransferase)	450	51	263	37	107	329	1e-35	84.51	95.77
Locus_41198_Transcript_1/1_Confidence_1.000	333	aory|AO090701000282 | OG5_128616 | predicted transporter (ABC superfamily)	617	331	2	254	363	569	2e-68	92.73	96.36
Locus_59133_Transcript_1/1_Confidence_1.000	1390	aory|AO090701000389 | OG5_134260 | predicted protein	454	1270	140	1	373	1170	2e-154	60	75
Locus_7516_Transcript_1/1_Confidence_1.000	2221	aory|AO090701000431 | OG5_175951 | predicted protein	279	1811	999	1	273	650	3e-76	47.12	64.75
Locus_676_Transcript_1/1_Confidence_1.000	2830	aory|AO090701000451 | OG5_156168 | predicted protein	349	1756	809	20	340	440	2e-45	35.54	52.71
Locus_926_Transcript_1/1_Confidence_1.000	1515	aory|AO090701000451 | OG5_156168 | predicted protein	349	1358	429	22	345	414	2e-43	30.28	51.68
Locus_7890_Transcript_1/1_Confidence_1.000	735	aory|AO090701000451 | OG5_156168 | predicted protein	349	25	735	88	327	331	4e-34	33.87	52.82
Locus_9342_Transcript_1/1_Confidence_1.000	1921	aory|AO090701000451 | OG5_156168 | predicted protein	349	1023	121	23	338	411	1e-42	34.89	53.58
Locus_14673_Transcript_1/1_Confidence_1.000	1784	aory|AO090701000451 | OG5_156168 | predicted protein	349	1705	791	24	340	401	3e-41	34.27	51.4
Locus_72499_Transcript_1/1_Confidence_1.000	274	aory|AO090701000749 | OG5_135951 | predicted protein	256	201	1	1	65	203	2e-18	57.35	72.06
Locus_59031_Transcript_1/1_Confidence_1.000	336	aory|AO090701000905 | OG5_153036 | predicted protein	503	6	335	304	413	284	8e-29	49.09	64.55
Locus_53061_Transcript_1/1_Confidence_1.000	355	apis|NP_001119689 | OG5_126668 | ribosomal protein S18 [Acyrthosiphon pisum]	152	30	353	1	107	398	8e-48	67.59	87.04
Locus_21507_Transcript_1/1_Confidence_1.000	356	apis|NP_001119698 | OG5_127273 | ribosomal protein L24 [Acyrthosiphon pisum]	157	54	356	1	101	362	3e-42	76.24	89.11
Locus_34375_Transcript_1/1_Confidence_1.000	289	apis|XP_001942611 | OG5_126942 | PREDICTED: similar to GST isoform 1 [Acyrthosiphon pisum]	216	279	1	1	93	339	1e-38	64.52	77.42
Locus_36329_Transcript_1/1_Confidence_1.000	384	apis|XP_001942928 | OG5_134803 | PREDICTED: similar to reverse transcriptase homolog [Acyrthosiphon pisum]	865	341	63	540	632	237	1e-21	45.16	62.37
Locus_33901_Transcript_1/1_Confidence_1.000	685	apis|XP_001944409 | OG5_126717 | PREDICTED: similar to oligopeptide transporter [Acyrthosiphon pisum]	990	685	5	583	806	152	9e-10	25.85	41.53
Locus_6936_Transcript_1/1_Confidence_1.000	524	apis|XP_001945366 | OG5_126792 | PREDICTED: similar to putative peptidyl-prolyl cis-trans isomerase [Acyrthosiphon pisum]	164	142	8	1	45	157	1e-11	62.22	80
Locus_19029_Transcript_1/1_Confidence_1.000	270	apis|XP_001947820 | OG5_127228 | PREDICTED: similar to tropomyosin 1 [Acyrthosiphon pisum]	284	3	83	258	284	142	5e-10	100	100
Locus_36729_Transcript_1/1_Confidence_1.000	253	apis|XP_001948174 | OG5_127368 | PREDICTED: similar to putative ribosomal protein S7e [Acyrthosiphon pisum]	204	251	60	129	189	165	1e-13	48.44	68.75
Locus_29196_Transcript_1/1_Confidence_1.000	363	apis|XP_001948229 | OG5_126595 | PREDICTED: similar to cytoplasmic actin isoform 2 [Acyrthosiphon pisum]	341	2	361	110	229	620	9e-79	97.5	99.17
Locus_44767_Transcript_1/1_Confidence_1.000	218	apis|XP_001948229 | OG5_126595 | PREDICTED: similar to cytoplasmic actin isoform 2 [Acyrthosiphon pisum]	341	194	3	178	241	330	2e-36	93.75	98.44
Locus_32925_Transcript_1/1_Confidence_1.000	385	apis|XP_001948309 | OG5_132857 | PREDICTED: similar to AGAP011393-PA [Acyrthosiphon pisum]	948	382	185	542	607	124	1e-06	36.36	59.09
Locus_5783_Transcript_1/1_Confidence_1.000	355	apis|XP_001948457 | OG5_126595 | PREDICTED: similar to Actin-87E [Acyrthosiphon pisum]	332	1	354	127	244	622	4e-79	99.15	99.15
Locus_14254_Transcript_1/1_Confidence_1.000	661	apis|XP_001949301 | OG5_129052 | PREDICTED: similar to predicted protein [Acyrthosiphon pisum]	314	364	615	150	232	184	4e-27	39.29	67.86
Locus_31678_Transcript_1/1_Confidence_1.000	273	apis|XP_001949697 | OG5_127016 | PREDICTED: similar to putative ribosomal protein L27A [Acyrthosiphon pisum]	147	74	271	7	72	202	6e-19	72.73	86.36
Locus_51948_Transcript_1/1_Confidence_1.000	333	apis|XP_001950064 | OG5_170031 | PREDICTED: similar to HSP70 [Acyrthosiphon pisum]	268	205	333	4	46	149	7e-11	53.49	74.42
Locus_15010_Transcript_1/1_Confidence_1.000	300	apis|XP_001951042 | OG5_126874 | PREDICTED: similar to putative ribosomal protein L3 [Acyrthosiphon pisum]	408	2	256	313	397	415	6e-48	88.24	94.12
Locus_57855_Transcript_1/1_Confidence_1.000	428	apis|XP_001951671 | OG5_133792 | PREDICTED: similar to conserved hypothetical protein, partial [Acyrthosiphon pisum]	684	402	10	52	181	145	2e-09	27.41	49.63
Locus_30968_Transcript_1/1_Confidence_1.000	451	apis|XP_001951708 | OG5_126857 | PREDICTED: similar to Glutamate dehydrogenase CG5320-PF [Acyrthosiphon pisum]	537	2	451	317	466	702	3e-88	86.67	91.33
Locus_8998_Transcript_1/1_Confidence_1.000	2757	apis|XP_001952024 | OG5_129052 | PREDICTED: similar to Tigger transposable element-derived protein 6 [Acyrthosiphon pisum]	424	2042	840	9	379	477	6e-50	29.63	50.12
Locus_21297_Transcript_1/1_Confidence_1.000	265	apis|XP_001952601 | OG5_127048 | PREDICTED: similar to CG32000 CG32000-PH [Acyrthosiphon pisum]	1378	15	263	499	582	171	4e-13	42.86	60.71
Locus_4295_Transcript_1/1_Confidence_1.000	2051	atha|NP_001030665 | OG5_140393 | hydrolase, alpha/beta fold family protein [Arabidopsis thaliana]	527	1858	2049	162	225	204	8e-15	60.94	82.81
Locus_8374_Transcript_1/1_Confidence_1.000	786	atha|NP_001030735 | OG5_127523 | NFU4; structural molecule [Arabidopsis thaliana]	222	576	785	57	128	247	5e-23	68.06	80.56
Locus_32991_Transcript_1/1_Confidence_1.000	340	atha|NP_001030749 | OG5_129624 | dienelactone hydrolase family protein [Arabidopsis thaliana]	236	31	327	138	236	256	8e-26	48.48	64.65
Locus_25749_Transcript_1/1_Confidence_1.000	1209	atha|NP_001030776 | OG5_153161 | ICE1 (INDUCER OF CBF EXPRESSION 1); DNA binding / transcription activator/ transcription factor [Arabidopsis thaliana]	494	3	749	272	489	583	3e-67	54.98	65.74
Locus_2073_Transcript_1/1_Confidence_1.000	667	atha|NP_001030845 | no_group | ATPQ (ATP SYNTHASE D CHAIN, MITOCHONDRIAL) [Arabidopsis thaliana]	122	309	1	1	106	291	1e-30	51.89	72.64
Locus_7200_Transcript_1/1_Confidence_1.000	1724	atha|NP_001030908 | OG5_156287 | NTMC2T4; lipid binding [Arabidopsis thaliana]	510	1724	1095	215	424	542	2e-59	54.29	72.38
Locus_17107_Transcript_1/1_Confidence_1.000	506	atha|NP_001030908 | OG5_156287 | NTMC2T4; lipid binding [Arabidopsis thaliana]	510	3	506	2	168	578	1e-69	62.5	81.55
Locus_9215_Transcript_1/1_Confidence_1.000	586	atha|NP_001030933 | OG5_152677 | SET domain-containing protein [Arabidopsis thaliana]	547	483	7	1	157	387	1e-41	50.62	71.25
Locus_6332_Transcript_1/1_Confidence_1.000	865	atha|NP_001030993 | OG5_126631 | elongation factor 1-alpha / EF-1-alpha [Arabidopsis thaliana]	449	852	1	1	284	1485	0	96.83	98.24
Locus_15928_Transcript_1/1_Confidence_1.000	1153	atha|NP_001030993 | OG5_126631 | elongation factor 1-alpha / EF-1-alpha [Arabidopsis thaliana]	449	140	1153	1	338	1732	0	94.97	98.22
Locus_3947_Transcript_1/1_Confidence_1.000	668	atha|NP_001031023 | OG5_129753 | PYM (Partner of Y14-Mago); protein binding [Arabidopsis thaliana]	204	84	362	111	204	146	1e-09	39.58	63.54
Locus_42689_Transcript_1/1_Confidence_1.000	452	atha|NP_001031030 | OG5_130691 | ATCCS (COPPER CHAPERONE FOR SOD1); superoxide dismutase/ superoxide dismutase copper chaperone [Arabidopsis thaliana]	184	239	436	29	94	203	5e-18	57.58	72.73
Locus_17556_Transcript_1/1_Confidence_1.000	447	atha|NP_001031118 | OG5_126853 | MUR4 (MURUS 4); UDP-arabinose 4-epimerase/ catalytic [Arabidopsis thaliana]	419	321	1	12	117	265	6e-26	57.01	76.64
Locus_1290_Transcript_1/1_Confidence_1.000	308	atha|NP_001031154 | OG5_150201 | unknown protein [Arabidopsis thaliana]	342	81	308	63	143	159	6e-12	43.21	61.73
Locus_73083_Transcript_1/1_Confidence_1.000	1472	atha|NP_001031211 | OG5_164251 | unknown protein [Arabidopsis thaliana]	473	337	1470	14	374	235	4e-19	24.48	45.62
Locus_7745_Transcript_1/1_Confidence_1.000	822	atha|NP_001031235 | OG5_129901 | GTG1 (GPCR-TYPE G PROTEIN 1) [Arabidopsis thaliana]	468	2	199	403	468	263	4e-24	72.73	92.42
Locus_9734_Transcript_1/1_Confidence_1.000	2448	atha|NP_001031252 | OG5_150204 | protein phosphatase 2C-related / PP2C-related [Arabidopsis thaliana]	436	2393	1116	1	431	1385	0	60.87	76.89
Locus_5051_Transcript_1/1_Confidence_1.000	1911	atha|NP_001031283 | OG5_128727 | SEC14 cytosolic factor family protein / phosphoglyceride transfer family protein [Arabidopsis thaliana]	296	1833	967	5	290	839	1e-104	52.94	70.59
Locus_25986_Transcript_1/1_Confidence_1.000	706	atha|NP_001031293 | OG5_134427 | unknown protein [Arabidopsis thaliana]	122	21	359	4	116	243	2e-23	61.95	76.99
Locus_16481_Transcript_1/1_Confidence_1.000	814	atha|NP_001031300 | OG5_130461 | 2-dehydro-3-deoxyphosphooctonate aldolase / phospho-2-dehydro-3-deoxyoctonate aldolase / 3-deoxy-D-manno-octulosonic acid 8-phosphate synthetase (KDSA) [Arabidopsis thaliana]	290	154	813	1	220	997	8e-134	80.91	91.82
Locus_22153_Transcript_1/1_Confidence_1.000	345	atha|NP_001031396 | OG5_163560 | unknown protein [Arabidopsis thaliana]	819	3	344	130	233	240	4e-22	41.88	63.25
Locus_24494_Transcript_1/1_Confidence_1.000	277	atha|NP_001031396 | OG5_163560 | unknown protein [Arabidopsis thaliana]	819	276	1	192	279	256	1e-24	47.83	69.57
Locus_57044_Transcript_1/1_Confidence_1.000	322	atha|NP_001031396 | OG5_163560 | unknown protein [Arabidopsis thaliana]	819	320	3	166	267	311	7e-32	52.83	69.81
Locus_13006_Transcript_1/1_Confidence_1.000	4086	atha|NP_001031449 | OG5_170093 | unknown protein [Arabidopsis thaliana]	421	3954	4085	322	366	153	2e-08	60	77.78
Locus_27709_Transcript_1/1_Confidence_1.000	840	atha|NP_001031493 | OG5_155258 | kelch repeat-containing protein [Arabidopsis thaliana]	496	416	3	4	141	495	5e-56	64.49	81.16
Locus_9085_Transcript_2/2_Confidence_1.000	300	atha|NP_001031498 | OG5_139529 | kinase [Arabidopsis thaliana]	714	278	54	426	502	124	5e-07	38.96	58.44
Locus_50960_Transcript_1/1_Confidence_1.000	387	atha|NP_001031498 | OG5_139529 | kinase [Arabidopsis thaliana]	714	55	378	395	502	239	7e-22	49.07	72.22
Locus_67549_Transcript_1/1_Confidence_1.000	269	atha|NP_001031498 | OG5_139529 | kinase [Arabidopsis thaliana]	714	261	49	188	263	153	6e-11	40.79	64.47
Locus_48515_Transcript_1/1_Confidence_1.000	263	atha|NP_001031499 | OG5_139529 | kinase [Arabidopsis thaliana]	934	235	2	426	505	122	7e-07	37.5	56.25
Locus_4537_Transcript_1/1_Confidence_1.000	367	atha|NP_001031547 | OG5_139530 | unknown protein [Arabidopsis thaliana]	210	367	2	84	204	425	5e-51	66.39	80.33
Locus_14721_Transcript_1/1_Confidence_1.000	3720	atha|NP_001031578 | OG5_150208 | MLO1; calmodulin binding [Arabidopsis thaliana]	526	2310	784	2	485	975	4e-116	41.78	58.99
Locus_43757_Transcript_1/1_Confidence_1.000	703	atha|NP_001031578 | OG5_150208 | MLO1; calmodulin binding [Arabidopsis thaliana]	526	4	615	269	474	550	2e-64	53.4	74.27
Locus_11185_Transcript_1/1_Confidence_1.000	596	atha|NP_001031704 | OG5_127963 | SGT1A; protein binding [Arabidopsis thaliana]	351	3	254	267	350	355	5e-38	77.38	90.48
Locus_16214_Transcript_1/1_Confidence_1.000	1650	atha|NP_001031749 | OG5_133113 | bacterial transferase hexapeptide repeat-containing protein [Arabidopsis thaliana]	336	1466	1648	33	97	217	3e-17	60	81.54
Locus_3191_Transcript_1/1_Confidence_1.000	4232	atha|NP_001031758 | OG5_128497 | protein kinase family protein [Arabidopsis thaliana]	412	2689	1889	124	388	711	1e-80	49.81	66.67
Locus_6333_Transcript_1/1_Confidence_1.000	2445	atha|NP_001031793 | OG5_156311 | oxidoreductase, 2OG-Fe(II) oxygenase family protein [Arabidopsis thaliana]	452	1363	554	101	370	963	6e-119	64.44	75.93
Locus_21564_Transcript_1/1_Confidence_1.000	403	atha|NP_001031905 | OG5_139450 | pleckstrin homology (PH) domain-containing protein / RhoGAP domain-containing protein [Arabidopsis thaliana]	714	380	3	6	128	504	2e-58	78.57	84.13
Locus_64813_Transcript_1/1_Confidence_1.000	382	atha|NP_001031908 | OG5_128844 | transferase [Arabidopsis thaliana]	456	254	382	30	71	134	3e-08	60.47	86.05
Locus_13996_Transcript_1/1_Confidence_1.000	590	atha|NP_001031930 | OG5_129476 | DNAJ heat shock N-terminal domain-containing protein [Arabidopsis thaliana]	296	2	325	185	288	238	7e-22	48.15	68.52
Locus_41999_Transcript_1/1_Confidence_1.000	355	atha|NP_001031942 | OG5_126886 | PYR6; cytidylate kinase/ uridylate kinase [Arabidopsis thaliana]	202	1	354	21	139	494	1e-61	78.99	88.24
Locus_12614_Transcript_1/1_Confidence_1.000	375	atha|NP_001031946 | OG5_164274 | unknown protein [Arabidopsis thaliana]	315	14	373	96	215	138	6e-09	40	62.5
Locus_14556_Transcript_1/1_Confidence_1.000	3419	atha|NP_001031970 | OG5_127901 | protein kinase family protein [Arabidopsis thaliana]	787	966	3344	27	779	1541	0	46.29	60.66
Locus_14180_Transcript_1/1_Confidence_1.000	1085	atha|NP_001032044 | OG5_170127 | unknown protein [Arabidopsis thaliana]	145	910	665	33	113	189	3e-15	46.51	65.12
Locus_18105_Transcript_1/1_Confidence_1.000	297	atha|NP_001032091 | OG5_131288 | methyladenine glycosylase family protein [Arabidopsis thaliana]	347	115	297	116	179	150	1e-10	50.77	64.62
Locus_19089_Transcript_1/1_Confidence_1.000	435	atha|NP_001032119 | OG5_131484 | L-asparaginase, putative / L-asparagine amidohydrolase, putative [Arabidopsis thaliana]	257	10	381	134	257	523	8e-65	77.42	87.1
Locus_45890_Transcript_1/1_Confidence_1.000	263	atha|NP_001032157 | OG5_131148 | Expressed protein [Arabidopsis thaliana]	192	161	3	6	57	172	1e-14	60.38	81.13
Locus_40196_Transcript_1/1_Confidence_1.000	603	atha|NP_001032160 | OG5_137525 | unknown protein [Arabidopsis thaliana]	323	183	7	20	77	175	3e-13	53.33	73.33
Locus_4273_Transcript_1/1_Confidence_1.000	659	atha|NP_001032165 | OG5_126901 | CKA1 (CASEIN KINASE ALPHA 1); kinase [Arabidopsis thaliana]	376	2	658	116	334	1109	2e-150	92.69	95.89
Locus_803_Transcript_1/1_Confidence_1.000	264	atha|NP_001077441 | OG5_134379 | PIP1C (PLASMA MEMBRANE INTRINSIC PROTEIN 1C); water channel [Arabidopsis thaliana]	214	3	263	38	124	379	1e-44	85.06	91.95
Locus_16528_Transcript_1/1_Confidence_1.000	1162	atha|NP_001077469 | OG5_164054 | unknown protein [Arabidopsis thaliana]	56	218	370	2	52	149	2e-10	60.78	78.43
Locus_9614_Transcript_1/1_Confidence_1.000	2605	atha|NP_001077471 | OG5_129243 | transporter-related [Arabidopsis thaliana]	357	1567	2556	1	329	1198	1e-154	81.21	88.18
Locus_3545_Transcript_1/1_Confidence_1.000	450	atha|NP_001077483 | no_group | elongation factor 1-alpha / EF-1-alpha [Arabidopsis thaliana]	372	1	450	35	184	784	2e-102	96.67	98.67
Locus_26550_Transcript_1/1_Confidence_1.000	340	atha|NP_001077483 | no_group | elongation factor 1-alpha / EF-1-alpha [Arabidopsis thaliana]	372	191	340	1	50	258	2e-25	100	100
Locus_9620_Transcript_1/1_Confidence_1.000	1122	atha|NP_001077523 | OG5_147141 | thylakoid lumenal protein-related [Arabidopsis thaliana]	206	460	1044	10	204	841	7e-110	80.51	91.28
Locus_9385_Transcript_1/1_Confidence_1.000	773	atha|NP_001077548 | OG5_141396 | unknown protein [Arabidopsis thaliana]	276	537	773	12	93	192	2e-15	48.78	68.29
Locus_48661_Transcript_1/1_Confidence_1.000	633	atha|NP_001077548 | OG5_141396 | unknown protein [Arabidopsis thaliana]	276	6	518	103	275	409	1e-46	56.18	66.29
Locus_27632_Transcript_1/1_Confidence_1.000	1912	atha|NP_001077592 | OG5_169473 | protein kinase family protein [Arabidopsis thaliana]	361	71	952	1	283	754	3e-91	53.06	70.41
Locus_13059_Transcript_1/1_Confidence_1.000	1398	atha|NP_001077646 | OG5_170136 | protein binding / zinc ion binding [Arabidopsis thaliana]	1068	1357	1199	108	160	195	6e-14	62.26	69.81
Locus_12753_Transcript_1/1_Confidence_1.000	347	atha|NP_001077723 | OG5_144790 | AAE18 (ACYL-ACTIVATING ENZYME 18); catalytic/ ligase [Arabidopsis thaliana]	511	342	7	258	368	385	9e-43	62.5	77.68
Locus_17792_Transcript_1/1_Confidence_1.000	604	atha|NP_001077832 | OG5_133722 | unknown protein [Arabidopsis thaliana]	80	604	467	35	80	140	8e-10	56.52	80.43
Locus_4111_Transcript_1/1_Confidence_1.000	590	atha|NP_001077906 | OG5_137926 | phosphoglycerate/bisphosphoglycerate mutase family protein [Arabidopsis thaliana]	271	39	590	9	191	608	2e-76	60.33	73.91
Locus_7693_Transcript_1/1_Confidence_1.000	2281	atha|NP_001077911 | OG5_156311 | oxidoreductase, 2OG-Fe(II) oxygenase family protein [Arabidopsis thaliana]	433	57	434	218	343	337	1e-31	46.83	66.67
Locus_5977_Transcript_1/1_Confidence_1.000	550	atha|NP_001077930 | OG5_130375 | translocon-associated protein alpha (TRAP alpha) family protein [Arabidopsis thaliana]	188	159	1	57	109	141	2e-09	50.94	73.58
Locus_43121_Transcript_1/1_Confidence_1.000	338	atha|NP_001077988 | OG5_126913 | endonuclease-related [Arabidopsis thaliana]	377	191	3	272	330	214	1e-31	63.49	73.02
Locus_25715_Transcript_1/1_Confidence_1.000	276	atha|NP_001077989 | OG5_128766 | TEJ (Sanskrit for bright); poly(ADP-ribose) glycohydrolase [Arabidopsis thaliana]	547	25	276	74	159	206	4e-18	48.28	64.37
Locus_350_Transcript_1/1_Confidence_1.000	269	atha|NP_001078067 | OG5_211639 | PIP1B (NAMED PLASMA MEMBRANE INTRINSIC PROTEIN 1B); water channel [Arabidopsis thaliana]	301	65	226	1	54	197	1e-17	64.81	77.78
Locus_210_Transcript_1/1_Confidence_1.000	1873	atha|NP_001078129 | OG5_177327 | aspartate/glutamate/uridylate kinase family protein [Arabidopsis thaliana]	520	1532	1834	147	252	268	8e-23	50.94	69.81
Locus_7163_Transcript_1/1_Confidence_1.000	808	atha|NP_001078129 | OG5_177327 | aspartate/glutamate/uridylate kinase family protein [Arabidopsis thaliana]	520	801	493	176	273	144	2e-08	42.72	63.11
Locus_2472_Transcript_1/1_Confidence_1.000	473	atha|NP_001078175 | OG5_129249 | ATTDX (TETRATICOPEPTIDE DOMAIN-CONTAINING THIOREDOXIN); oxidoreductase, acting on sulfur group of donors, disulfide as acceptor / protein binding [Arabidopsis thaliana]	373	471	373	193	225	142	4e-09	81.82	87.88
Locus_33811_Transcript_1/1_Confidence_1.000	695	atha|NP_001078259 | OG5_170157 | RNA binding [Arabidopsis thaliana]	697	112	11	68	101	146	5e-09	76.47	82.35
Locus_17798_Transcript_1/1_Confidence_1.000	2547	atha|NP_001078284 | OG5_163965 | emb1967 (embryo defective 1967) [Arabidopsis thaliana]	702	1256	654	481	698	409	1e-39	45.87	66.51
Locus_28454_Transcript_1/1_Confidence_1.000	890	atha|NP_001078372 | OG5_128940 | KELP; DNA binding / transcription coactivator/ transcription regulator [Arabidopsis thaliana]	165	1	237	84	162	256	2e-24	54.43	81.01
Locus_17334_Transcript_1/1_Confidence_1.000	669	atha|NP_001078401 | OG5_211664 | unknown protein [Arabidopsis thaliana]	57	437	324	8	45	117	1e-06	60.53	73.68
Locus_45268_Transcript_1/1_Confidence_1.000	333	atha|NP_001078409 | OG5_132881 | zinc finger (C3HC4-type RING finger) family protein [Arabidopsis thaliana]	532	5	274	325	414	216	3e-19	48.35	62.64
Locus_1845_Transcript_1/1_Confidence_1.000	706	atha|NP_001078487 | OG5_130802 | DHS2 (3-deoxy-d-arabino-heptulosonate 7-phosphate synthase); 3-deoxy-7-phosphoheptulonate synthase [Arabidopsis thaliana]	432	16	705	31	259	920	1e-120	74.46	85.28
Locus_20906_Transcript_1/1_Confidence_1.000	1940	atha|NP_001078498 | OG5_211672 | RTFL6 (ROTUNDIFOLIA LIKE 6) [Arabidopsis thaliana]	62	1534	1334	1	61	146	2e-09	47.76	59.7
Locus_6695_Transcript_1/1_Confidence_1.000	1067	atha|NP_001078502 | no_group | ATPBRP (PLANT-SPECIFIC TFIIB-RELATED PROTEIN); RNA polymerase II transcription factor/ rDNA binding [Arabidopsis thaliana]	369	468	1067	3	194	430	8e-47	50	66
Locus_36108_Transcript_1/1_Confidence_1.000	381	atha|NP_001078508 | OG5_156356 | peroxidase, putative [Arabidopsis thaliana]	282	2	379	159	282	305	2e-32	46.83	59.52
Locus_1588_Transcript_1/1_Confidence_1.000	313	atha|NP_001078516 | OG5_126569 | histone H3.2 [Arabidopsis thaliana]	164	140	3	32	77	229	1e-22	100	100
Locus_2036_Transcript_1/1_Confidence_1.000	2157	atha|NP_001078572 | OG5_130261 | NLI interacting factor (NIF) family protein [Arabidopsis thaliana]	305	778	107	81	305	886	1e-110	72.44	86.22
Locus_2941_Transcript_1/1_Confidence_1.000	2282	atha|NP_001078579 | OG5_129172 | SMT1 (STEROL METHYLTRANSFERASE 1); sterol 24-C-methyltransferase [Arabidopsis thaliana]	336	1917	916	2	335	1323	5e-175	70.36	84.73
Locus_8205_Transcript_1/1_Confidence_1.000	1358	atha|NP_001078690 | OG5_170179 | ATBPC6; DNA binding / transcription factor [Arabidopsis thaliana]	338	17	856	23	338	455	8e-50	37.42	55.03
Locus_18411_Transcript_1/1_Confidence_1.000	968	atha|NP_001078705 | OG5_127988 | CBP20 (CAP-BINDING PROTEIN 20); RNA binding / RNA cap binding [Arabidopsis thaliana]	257	3	308	124	240	217	2e-18	52.46	60.66
Locus_30666_Transcript_1/1_Confidence_1.000	399	atha|NP_001078705 | OG5_127988 | CBP20 (CAP-BINDING PROTEIN 20); RNA binding / RNA cap binding [Arabidopsis thaliana]	257	12	398	10	138	533	2e-66	87.6	95.35
Locus_25867_Transcript_1/1_Confidence_1.000	1123	atha|NP_001078706 | OG5_210114 | unknown protein [Arabidopsis thaliana]	302	1113	733	103	225	161	2e-10	28.91	52.34
Locus_28575_Transcript_1/1_Confidence_1.000	421	atha|NP_001078738 | OG5_164319 | cell expansion protein, putative [Arabidopsis thaliana]	2587	54	419	554	676	125	9e-07	33.33	56.1
Locus_6400_Transcript_1/1_Confidence_1.000	343	atha|NP_001078739 | OG5_137245 | NFU2 (NIFU-LIKE PROTEIN 2); structural molecule [Arabidopsis thaliana]	185	327	1	66	173	429	4e-52	76.15	88.99
Locus_14420_Transcript_1/1_Confidence_1.000	822	atha|NP_001078747 | OG5_150228 | ATP binding / nucleoside-triphosphatase/ nucleotide binding [Arabidopsis thaliana]	829	2	115	792	829	174	3e-12	84.21	94.74
Locus_29449_Transcript_1/1_Confidence_1.000	268	atha|NP_001078756 | OG5_156314 | IAMT1 (IAA CARBOXYLMETHYLTRANSFERASE 1); S-adenosylmethionine-dependent methyltransferase/ indole acetic acid carboxyl methyltransferase [Arabidopsis thaliana]	348	3	254	250	330	132	2e-08	30.95	60.71
Locus_10693_Transcript_1/1_Confidence_1.000	549	atha|NP_001078795 | OG5_152707 | unknown protein [Arabidopsis thaliana]	243	547	413	194	237	122	2e-06	53.33	66.67
Locus_19851_Transcript_1/1_Confidence_1.000	1006	atha|NP_001117219 | OG5_144904 | TPK1 (THIAMIN PYROPHOSPHOKINASE1); thiamin diphosphokinase [Arabidopsis thaliana]	180	3	512	1	172	416	4e-47	56.98	75.58
Locus_24346_Transcript_1/1_Confidence_1.000	1310	atha|NP_001117233 | OG5_170185 | DNA binding [Arabidopsis thaliana]	1138	1279	41	517	925	1046	1e-128	47.26	66.83
Locus_4522_Transcript_1/1_Confidence_1.000	1215	atha|NP_001117239 | no_group | PSBP-1 (PHOTOSYSTEM II SUBUNIT P-1); poly(U) binding [Arabidopsis thaliana]	219	5	310	118	219	391	2e-42	71.57	84.31
Locus_6918_Transcript_1/1_Confidence_1.000	1575	atha|NP_001117381 | OG5_127511 | DNA binding / catalytic/ nuclease [Arabidopsis thaliana]	581	2	454	88	239	351	9e-34	45.51	69.87
Locus_10984_Transcript_1/1_Confidence_1.000	1280	atha|NP_001117459 | OG5_127212 | TOR (TARGET OF RAPAMYCIN); 1-phosphatidylinositol-3-kinase/ protein binding [Arabidopsis thaliana]	2454	1	210	2365	2454	256	2e-21	61.11	65.56
Locus_30636_Transcript_1/1_Confidence_1.000	759	atha|NP_001117544 | OG5_150228 | AAA-type ATPase family protein [Arabidopsis thaliana]	827	133	759	246	454	559	1e-63	47.62	71.9
Locus_12940_Transcript_1/1_Confidence_1.000	851	atha|NP_001117591 | OG5_127136 | protein binding [Arabidopsis thaliana]	598	851	3	34	336	406	5e-43	36.93	54.58
Locus_37498_Transcript_1/1_Confidence_1.000	250	atha|NP_001117591 | OG5_127136 | protein binding [Arabidopsis thaliana]	598	239	18	33	107	135	9e-09	37.33	56
Locus_2658_Transcript_1/1_Confidence_1.000	1282	atha|NP_001118559 | OG5_153219 | unknown protein [Arabidopsis thaliana]	72	891	676	1	72	263	5e-26	63.89	79.17
Locus_14243_Transcript_1/1_Confidence_1.000	530	atha|NP_001118617 | OG5_211739 | unknown protein [Arabidopsis thaliana]	37	236	132	1	35	147	3e-11	80	88.57
Locus_5711_Transcript_1/1_Confidence_1.000	1628	atha|NP_001118718 | OG5_126893 | SDH2-1; electron carrier/ succinate dehydrogenase [Arabidopsis thaliana]	279	231	926	48	278	1034	2e-135	80.6	87.93
Locus_33455_Transcript_1/1_Confidence_1.000	826	atha|NP_001118801 | OG5_177396 | unknown protein [Arabidopsis thaliana]	220	259	438	159	218	126	1e-06	36.67	66.67
Locus_18992_Transcript_1/1_Confidence_1.000	366	atha|NP_001118936 | OG5_126703 | UBQ11 (UBIQUITIN 11); protein binding [Arabidopsis thaliana]	229	365	3	66	186	609	1e-78	99.17	100
Locus_27207_Transcript_1/1_Confidence_1.000	256	atha|NP_001118936 | OG5_126703 | UBQ11 (UBIQUITIN 11); protein binding [Arabidopsis thaliana]	229	255	1	22	106	427	8e-52	98.82	100
Locus_59697_Transcript_1/1_Confidence_1.000	276	atha|NP_001118936 | OG5_126703 | UBQ11 (UBIQUITIN 11); protein binding [Arabidopsis thaliana]	229	275	3	21	111	462	8e-57	100	100
Locus_38851_Transcript_1/1_Confidence_1.000	1291	atha|NP_001119286 | OG5_132274 | P-P-bond-hydrolysis-driven protein transmembrane transporter [Arabidopsis thaliana]	296	124	789	79	296	516	3e-59	46.85	66.22
Locus_26850_Transcript_1/1_Confidence_1.000	1785	atha|NP_001119413 | OG5_150020 | EMF2 (EMBRYONIC FLOWER 2); DNA binding / transcription factor [Arabidopsis thaliana]	626	1028	1603	42	213	242	2e-19	34.02	47.42
Locus_56110_Transcript_1/1_Confidence_1.000	268	atha|NP_001119486 | OG5_146427 | unknown protein [Arabidopsis thaliana]	677	29	268	99	178	196	1e-16	46.25	63.75
Locus_3440_Transcript_1/1_Confidence_1.000	1912	atha|NP_001154293 | OG5_211800 | unknown protein [Arabidopsis thaliana]	781	108	1226	420	767	194	2e-13	24.41	40.42
Locus_1259_Transcript_1/1_Confidence_1.000	2328	atha|NP_001154422 | OG5_211812 | BRX-LIKE3 (BREVIS RADIX-LIKE 3) [Arabidopsis thaliana]	344	2327	1449	44	344	375	3e-37	35.58	48.47
Locus_43885_Transcript_1/1_Confidence_1.000	251	atha|NP_001154460 | OG5_170247 | armadillo/beta-catenin repeat protein-related / U-box domain-containing protein [Arabidopsis thaliana]	1035	237	1	427	505	149	2e-10	41.77	60.76
Locus_37802_Transcript_1/1_Confidence_1.000	259	atha|NP_001154553 | OG5_177320 | unknown protein [Arabidopsis thaliana]	879	5	238	69	147	150	1e-10	44.3	62.03
Locus_5955_Transcript_1/1_Confidence_1.000	254	atha|NP_001154639 | OG5_135131 | XRCC4; protein C-terminus binding [Arabidopsis thaliana]	264	252	1	112	195	185	4e-16	47.62	65.48
Locus_39529_Transcript_1/1_Confidence_1.000	696	atha|NP_001154741 | OG5_134215 | nucleic acid binding / zinc ion binding [Arabidopsis thaliana]	147	675	388	57	147	130	9e-08	31.25	44.79
Locus_27123_Transcript_1/1_Confidence_1.000	938	atha|NP_001154788 | OG5_153059 | DNAJ heat shock N-terminal domain-containing protein [Arabidopsis thaliana]	256	659	937	75	162	241	1e-21	54.84	73.12
Locus_24628_Transcript_1/1_Confidence_1.000	904	atha|NP_030274 | OG5_132943 | unknown protein [Arabidopsis thaliana]	248	897	514	122	248	401	2e-44	56.25	74.22
Locus_854_Transcript_1/1_Confidence_1.000	854	atha|NP_030524 | OG5_128552 | RNS2 (RIBONUCLEASE 2); RNA binding / endoribonuclease/ ribonuclease T2 [Arabidopsis thaliana]	259	368	853	2	144	330	4e-34	40.48	54.76
Locus_14265_Transcript_1/1_Confidence_1.000	1001	atha|NP_030605 | OG5_127054 | appr-1-p processing enzyme family protein [Arabidopsis thaliana]	257	1000	590	118	254	400	7e-44	51.82	69.34
Locus_52429_Transcript_1/1_Confidence_1.000	270	atha|NP_171612 | OG5_128554 | DCL1 (DICER-LIKE 1); ATP-dependent helicase/ double-stranded RNA binding / protein binding / ribonuclease III [Arabidopsis thaliana]	1909	6	269	1557	1644	200	5e-17	48.86	62.5
Locus_12975_Transcript_1/1_Confidence_1.000	1181	atha|NP_171635 | OG5_133031 | CYP703A2 (CYTOCHROME P450, FAMILY 703, SUBFAMILY A, POLYPEPTIDE 2); oxidoreductase, acting on paired donors, with incorporation or reduction of molecular oxygen, NADH or NADPH as one donor, and incorporation of one atom of oxygen / oxygen binding [Arabid	510	1056	4	48	407	590	3e-68	35.18	58.17
Locus_33090_Transcript_1/1_Confidence_1.000	531	atha|NP_171635 | OG5_133031 | CYP703A2 (CYTOCHROME P450, FAMILY 703, SUBFAMILY A, POLYPEPTIDE 2); oxidoreductase, acting on paired donors, with incorporation or reduction of molecular oxygen, NADH or NADPH as one donor, and incorporation of one atom of oxygen / oxygen binding [Arabid	510	15	527	135	301	142	6e-09	29.48	49.71
Locus_2115_Transcript_1/1_Confidence_1.000	250	atha|NP_171654 | OG5_160094 | LEA14 (LATE EMBRYOGENESIS ABUNDANT 14) [Arabidopsis thaliana]	151	1	249	2	84	212	1e-20	45.78	67.47
Locus_1177_Transcript_1/1_Confidence_1.000	2051	atha|NP_171680 | OG5_127118 | ADF11 (ACTIN DEPOLYMERIZING FACTOR 11); actin binding [Arabidopsis thaliana]	140	19	435	1	139	386	2e-41	66.19	83.45
Locus_8879_Transcript_1/1_Confidence_1.000	627	atha|NP_171681 | OG5_129231 | RNA binding / adenosine deaminase [Arabidopsis thaliana]	420	626	9	234	411	338	4e-35	39.32	54.37
Locus_44872_Transcript_1/1_Confidence_1.000	556	atha|NP_171691 | OG5_134343 | DNA repair protein, putative [Arabidopsis thaliana]	570	231	554	235	345	188	1e-25	36.13	50.42
Locus_38520_Transcript_1/1_Confidence_1.000	452	atha|NP_171728 | OG5_128983 | transmembrane protein, putative [Arabidopsis thaliana]	502	56	451	300	431	428	3e-48	66.67	83.33
Locus_35227_Transcript_1/1_Confidence_1.000	683	atha|NP_171753 | OG5_126596 | PGP11 (P-GLYCOPROTEIN 11); ATPase, coupled to transmembrane movement of substances [Arabidopsis thaliana]	1278	683	3	599	807	337	2e-33	37	53.74
Locus_5145_Transcript_1/1_Confidence_1.000	1983	atha|NP_171779 | OG5_144919 | ATCEL2; cellulase/ hydrolase, hydrolyzing O-glycosyl compounds [Arabidopsis thaliana]	501	4	795	240	498	706	3e-82	51.48	64.81
Locus_37695_Transcript_1/1_Confidence_1.000	436	atha|NP_171802 | OG5_130623 | phosphoribulokinase/uridine kinase family protein [Arabidopsis thaliana]	301	2	169	244	299	214	3e-19	73.21	83.93
Locus_29713_Transcript_1/1_Confidence_1.000	1109	atha|NP_171815 | OG5_144896 | FZL (FZO-LIKE); GTP binding / GTPase/ thiamin-phosphate diphosphorylase [Arabidopsis thaliana]	912	721	1062	54	163	149	1e-08	45.61	64.91
Locus_63038_Transcript_1/1_Confidence_1.000	818	atha|NP_171836 | OG5_138081 | protein binding / zinc ion binding [Arabidopsis thaliana]	1859	9	281	824	912	156	7e-10	39.56	59.34
Locus_5569_Transcript_1/1_Confidence_1.000	2457	atha|NP_171872 | OG5_132093 | prefoldin subunit family protein [Arabidopsis thaliana]	391	386	649	1	86	222	8e-33	52.27	63.64
Locus_11048_Transcript_1/1_Confidence_1.000	1625	atha|NP_171908 | OG5_126561 | ATMRP5; ATPase, coupled to transmembrane movement of substances / sulfonylurea receptor [Arabidopsis thaliana]	1514	1009	1593	183	365	226	2e-17	30.96	51.27
Locus_19940_Transcript_1/1_Confidence_1.000	4448	atha|NP_171908 | OG5_126561 | ATMRP5; ATPase, coupled to transmembrane movement of substances / sulfonylurea receptor [Arabidopsis thaliana]	1514	635	4447	118	1391	3595	0	56.01	72.19
Locus_39146_Transcript_1/1_Confidence_1.000	738	atha|NP_171908 | OG5_126561 | ATMRP5; ATPase, coupled to transmembrane movement of substances / sulfonylurea receptor [Arabidopsis thaliana]	1514	206	736	227	403	498	1e-54	49.15	70.06
Locus_36504_Transcript_1/1_Confidence_1.000	393	atha|NP_171915 | OG5_135558 | tetratricopeptide repeat (TPR)-containing protein [Arabidopsis thaliana]	328	186	1	23	84	258	2e-25	79.03	91.94
Locus_27151_Transcript_1/1_Confidence_1.000	637	atha|NP_171996 | OG5_177463 | hexose transporter, putative [Arabidopsis thaliana]	524	336	629	66	162	343	2e-35	67.35	77.55
Locus_6523_Transcript_1/1_Confidence_1.000	1702	atha|NP_172002 | OG5_177464 | dentin sialophosphoprotein-related [Arabidopsis thaliana]	706	111	533	14	178	154	9e-09	30.12	41.57
Locus_20279_Transcript_1/1_Confidence_1.000	624	atha|NP_172004 | OG5_130425 | SNF2 domain-containing protein / helicase domain-containing protein / RING finger domain-containing protein [Arabidopsis thaliana]	833	1	621	398	603	648	7e-77	59.13	73.08
Locus_31934_Transcript_1/1_Confidence_1.000	805	atha|NP_172004 | OG5_130425 | SNF2 domain-containing protein / helicase domain-containing protein / RING finger domain-containing protein [Arabidopsis thaliana]	833	805	257	649	831	717	9e-86	69.4	86.89
Locus_37043_Transcript_1/1_Confidence_1.000	856	atha|NP_172008 | OG5_177466 | CYP88A3 (CYTOCHROME P450 88 A3); ent-kaurenoate oxidase/ oxygen binding [Arabidopsis thaliana]	490	372	7	27	148	324	4e-32	46.72	68.03
Locus_18972_Transcript_1/1_Confidence_1.000	1106	atha|NP_172018 | OG5_160099 | RCI3 (RARE COLD INDUCIBLE GENE 3); peroxidase [Arabidopsis thaliana]	326	1	621	121	325	447	2e-49	47.14	59.05
Locus_38982_Transcript_1/1_Confidence_1.000	351	atha|NP_172018 | OG5_160099 | RCI3 (RARE COLD INDUCIBLE GENE 3); peroxidase [Arabidopsis thaliana]	326	15	350	24	135	318	4e-34	58.93	73.21
Locus_35833_Transcript_1/1_Confidence_1.000	1401	atha|NP_172050 | OG5_127470 | HEXO2 (BETA-HEXOSAMINIDASE 2); beta-N-acetylhexosaminidase/ hexosaminidase/ hydrolase, hydrolyzing O-glycosyl compounds [Arabidopsis thaliana]	580	933	160	17	264	570	7e-64	46.01	61.6
Locus_42461_Transcript_1/1_Confidence_1.000	561	atha|NP_172050 | OG5_127470 | HEXO2 (BETA-HEXOSAMINIDASE 2); beta-N-acetylhexosaminidase/ hexosaminidase/ hydrolase, hydrolyzing O-glycosyl compounds [Arabidopsis thaliana]	580	560	468	544	574	145	4e-09	74.19	90.32
Locus_29383_Transcript_1/1_Confidence_1.000	673	atha|NP_172061 | OG5_129501 | leucine-rich repeat protein kinase, putative [Arabidopsis thaliana]	843	423	671	13	92	144	9e-09	43.02	59.3
Locus_9177_Transcript_1/1_Confidence_1.000	1768	atha|NP_172089 | OG5_147166 | calcium-binding protein, putative [Arabidopsis thaliana]	150	1162	701	1	143	280	9e-27	42.21	66.23
Locus_6808_Transcript_1/1_Confidence_1.000	843	atha|NP_172153 | OG5_147167 | PSBP-1 (PHOTOSYSTEM II SUBUNIT P-1); poly(U) binding [Arabidopsis thaliana]	263	843	301	83	263	687	3e-87	69.06	83.43
Locus_10854_Transcript_1/1_Confidence_1.000	3954	atha|NP_172169 | OG5_142460 | leucine-rich repeat transmembrane protein kinase, putative [Arabidopsis thaliana]	939	3816	1234	26	883	1615	0	47.74	62.64
Locus_11276_Transcript_1/1_Confidence_1.000	1347	atha|NP_172169 | OG5_142460 | leucine-rich repeat transmembrane protein kinase, putative [Arabidopsis thaliana]	939	1346	66	460	896	1123	1e-141	53.72	69.07
Locus_33794_Transcript_1/1_Confidence_1.000	836	atha|NP_172169 | OG5_142460 | leucine-rich repeat transmembrane protein kinase, putative [Arabidopsis thaliana]	939	2	835	179	473	516	2e-57	41.64	56.07
Locus_17246_Transcript_1/1_Confidence_1.000	1365	atha|NP_172202 | OG5_132001 | unknown protein [Arabidopsis thaliana]	507	597	1340	45	295	610	2e-70	48.43	64.96
Locus_27221_Transcript_1/1_Confidence_1.000	997	atha|NP_172202 | OG5_132001 | unknown protein [Arabidopsis thaliana]	507	980	513	312	461	459	4e-50	56.41	72.44
Locus_24656_Transcript_1/1_Confidence_1.000	968	atha|NP_172220 | OG5_126935 | 17.8 kDa class I heat shock protein (HSP17.8-CI) [Arabidopsis thaliana]	157	684	211	1	156	439	7e-51	53.66	71.95
Locus_36418_Transcript_1/1_Confidence_1.000	618	atha|NP_172220 | OG5_126935 | 17.8 kDa class I heat shock protein (HSP17.8-CI) [Arabidopsis thaliana]	157	3	218	68	142	196	8e-17	54.67	72
Locus_42067_Transcript_1/1_Confidence_1.000	383	atha|NP_172220 | OG5_126935 | 17.8 kDa class I heat shock protein (HSP17.8-CI) [Arabidopsis thaliana]	157	2	382	26	146	364	2e-42	57.03	71.88
Locus_27538_Transcript_1/1_Confidence_1.000	382	atha|NP_172244 | OG5_131783 | leucine-rich repeat transmembrane protein kinase, putative [Arabidopsis thaliana]	1014	379	68	846	949	287	3e-28	53.85	69.23
Locus_4468_Transcript_1/1_Confidence_1.000	867	atha|NP_172246 | OG5_126674 | calcium-transporting ATPase [Arabidopsis thaliana]	1061	1	318	952	1056	445	4e-47	82.08	90.57
Locus_17693_Transcript_1/1_Confidence_1.000	272	atha|NP_172265 | OG5_189705 | protein kinase family protein [Arabidopsis thaliana]	423	2	271	167	243	222	1e-20	47.78	64.44
Locus_69069_Transcript_1/1_Confidence_1.000	686	atha|NP_172268 | OG5_177475 | LBD1 (LOB DOMAIN-CONTAINING PROTEIN 1) [Arabidopsis thaliana]	190	87	437	28	145	284	8e-29	44.07	63.56
Locus_66200_Transcript_1/1_Confidence_1.000	1590	atha|NP_172287 | OG5_127628 | ACA7 (ALPHA CARBONIC ANHYDRASE 7); carbonate dehydratase/ zinc ion binding [Arabidopsis thaliana]	275	480	1208	9	264	412	9e-44	37.6	53.49
Locus_56134_Transcript_1/1_Confidence_1.000	1289	atha|NP_172305 | OG5_156388 | glycosyl transferase family 29 protein / sialyltransferase family protein [Arabidopsis thaliana]	398	980	102	125	397	612	3e-72	43.88	61.9
Locus_66139_Transcript_1/1_Confidence_1.000	428	atha|NP_172305 | OG5_156388 | glycosyl transferase family 29 protein / sialyltransferase family protein [Arabidopsis thaliana]	398	281	6	141	220	173	3e-13	44.57	60.87
Locus_66361_Transcript_1/1_Confidence_1.000	307	atha|NP_172305 | OG5_156388 | glycosyl transferase family 29 protein / sialyltransferase family protein [Arabidopsis thaliana]	398	307	44	224	311	247	3e-24	42.05	65.91
Locus_26329_Transcript_1/1_Confidence_1.000	1262	atha|NP_172315 | OG5_139541 | nucleic acid binding [Arabidopsis thaliana]	137	785	1144	7	133	241	3e-22	41.41	63.28
Locus_716_Transcript_1/1_Confidence_1.000	2346	atha|NP_172361 | OG5_129631 | emb2411 (embryo defective 2411); ATP binding / ATP-dependent DNA helicase/ DNA binding [Arabidopsis thaliana]	1296	2346	1	311	1077	1818	0	47.22	63.67
Locus_9796_Transcript_1/1_Confidence_1.000	851	atha|NP_172363 | OG5_126570 | H2AXA; DNA binding [Arabidopsis thaliana]	142	849	682	70	125	253	2e-24	85.71	91.07
Locus_14461_Transcript_1/1_Confidence_1.000	650	atha|NP_172363 | OG5_126570 | H2AXA; DNA binding [Arabidopsis thaliana]	142	650	453	55	120	314	6e-34	90.91	96.97
Locus_37715_Transcript_1/1_Confidence_1.000	621	atha|NP_172400 | OG5_160104 | unknown protein [Arabidopsis thaliana]	348	620	324	244	345	200	2e-16	44.12	62.75
Locus_23134_Transcript_1/1_Confidence_1.000	793	atha|NP_172401 | OG5_126673 | metallopeptidase M24 family protein [Arabidopsis thaliana]	493	353	793	9	160	398	2e-42	48.68	67.11
Locus_5350_Transcript_1/1_Confidence_1.000	2425	atha|NP_172442 | OG5_170289 | DNA binding [Arabidopsis thaliana]	610	237	425	197	259	232	6e-18	61.9	79.37
Locus_50725_Transcript_1/1_Confidence_1.000	719	atha|NP_172459 | OG5_133765 | lyase [Arabidopsis thaliana]	631	717	409	517	620	319	2e-31	58.65	75.96
Locus_26707_Transcript_1/1_Confidence_1.000	513	atha|NP_172464 | OG5_129217 | ATOPT2; oligopeptide transporter [Arabidopsis thaliana]	734	1	513	495	665	430	1e-47	43.27	67.84
Locus_41242_Transcript_1/1_Confidence_1.000	345	atha|NP_172522 | OG5_132021 | DNA polymerase lambda (POLL) [Arabidopsis thaliana]	529	1	339	261	373	413	2e-46	65.49	81.42
Locus_6934_Transcript_1/1_Confidence_1.000	1229	atha|NP_172533 | OG5_126696 | ATARFA1F (ARABIDOPSIS THALIANA ADP-RIBOSYLATION FACTOR A1F); GTP binding / copper ion binding / phospholipase activator/ protein binding [Arabidopsis thaliana]	181	186	713	1	173	672	3e-84	69.89	81.82
Locus_19016_Transcript_1/1_Confidence_1.000	670	atha|NP_172538 | OG5_126596 | PGP10 (P-GLYCOPROTEIN 10); ATPase, coupled to transmembrane movement of substances [Arabidopsis thaliana]	1227	189	1	22	85	175	1e-12	51.56	70.31
Locus_21590_Transcript_1/1_Confidence_1.000	1707	atha|NP_172566 | OG5_136894 | ZIP4 (ZINC TRANSPORTER 4 PRECURSOR); cation transmembrane transporter/ copper ion transmembrane transporter [Arabidopsis thaliana]	408	925	2	25	337	719	3e-86	53.11	66.15
Locus_11814_Transcript_1/1_Confidence_1.000	812	atha|NP_172592 | OG5_126798 | STP1 (SUGAR TRANSPORTER 1); carbohydrate transmembrane transporter/ sugar:hydrogen symporter [Arabidopsis thaliana]	522	37	453	377	517	396	6e-42	56.74	71.63
Locus_5889_Transcript_1/1_Confidence_1.000	1964	atha|NP_172633 | OG5_129288 | CYP51G1 (CYTOCHROME P450 51G1); oxygen binding / sterol 14-demethylase [Arabidopsis thaliana]	488	1827	469	35	488	1579	0	62.86	78.68
Locus_20635_Transcript_1/1_Confidence_1.000	1164	atha|NP_172637 | OG5_147171 | ATSS3 (starch synthase 3); starch synthase/ transferase, transferring glycosyl groups [Arabidopsis thaliana]	1025	755	15	97	340	538	1e-58	45.75	68.02
Locus_8168_Transcript_1/1_Confidence_1.000	1076	atha|NP_172660 | OG5_128300 | unknown protein [Arabidopsis thaliana]	771	1076	3	157	514	941	8e-118	54.04	71.87
Locus_67468_Transcript_1/1_Confidence_1.000	545	atha|NP_172717 | OG5_189730 | ATEXPA7 (ARABIDOPSIS THALIANA EXPANSIN A7) [Arabidopsis thaliana]	262	544	329	185	255	192	5e-16	52.78	65.28
Locus_68851_Transcript_1/1_Confidence_1.000	655	atha|NP_172717 | OG5_189730 | ATEXPA7 (ARABIDOPSIS THALIANA EXPANSIN A7) [Arabidopsis thaliana]	262	257	655	35	166	500	4e-60	66.17	78.95
Locus_2679_Transcript_1/1_Confidence_1.000	1041	atha|NP_172720 | OG5_131017 | unknown protein [Arabidopsis thaliana]	349	2	622	134	344	766	7e-97	73.58	86.32
Locus_30350_Transcript_1/1_Confidence_1.000	382	atha|NP_172769 | OG5_126582 | CYP71B29; electron carrier/ heme binding / iron ion binding / monooxygenase/ oxygen binding [Arabidopsis thaliana]	490	3	302	341	440	380	7e-42	66	79
Locus_5537_Transcript_1/1_Confidence_1.000	1948	atha|NP_172853 | OG5_156395 | VIK (VH1-INTERACTING KINASE); ATP binding / protein kinase/ protein serine/threonine/tyrosine kinase [Arabidopsis thaliana]	438	625	1884	3	427	1204	4e-157	57.98	72.07
Locus_16373_Transcript_1/1_Confidence_1.000	1206	atha|NP_172883 | OG5_128559 | haloacid dehalogenase-like hydrolase family protein [Arabidopsis thaliana]	254	1024	1206	34	97	211	3e-17	62.5	76.56
Locus_30227_Transcript_1/1_Confidence_1.000	287	atha|NP_172923 | OG5_129627 | PAP3 (PURPLE ACID PHOSPHATASE 3); acid phosphatase/ protein serine/threonine phosphatase [Arabidopsis thaliana]	366	3	143	134	180	173	5e-14	59.57	78.72
Locus_66610_Transcript_1/1_Confidence_1.000	1523	atha|NP_172925 | OG5_150130 | XTR2 (XYLOGLUCAN ENDOTRANSGLYCOSYLASE RELATED 2); hydrolase, acting on glycosyl bonds / xyloglucan:xyloglucosyl transferase [Arabidopsis thaliana]	332	1415	597	26	296	695	2e-84	46.89	63
Locus_21810_Transcript_1/1_Confidence_1.000	1044	atha|NP_172932 | OG5_130286 | RDR1 (RNA-DEPENDENT RNA POLYMERASE 1); RNA-directed RNA polymerase/ nucleic acid binding [Arabidopsis thaliana]	1107	116	625	4	170	147	2e-08	28.07	42.11
Locus_32356_Transcript_1/1_Confidence_1.000	501	atha|NP_172932 | OG5_130286 | RDR1 (RNA-DEPENDENT RNA POLYMERASE 1); RNA-directed RNA polymerase/ nucleic acid binding [Arabidopsis thaliana]	1107	54	500	479	625	411	3e-44	59.73	71.81
Locus_50823_Transcript_1/1_Confidence_1.000	280	atha|NP_172932 | OG5_130286 | RDR1 (RNA-DEPENDENT RNA POLYMERASE 1); RNA-directed RNA polymerase/ nucleic acid binding [Arabidopsis thaliana]	1107	5	244	266	345	135	2e-08	36.14	61.45
Locus_37727_Transcript_1/1_Confidence_1.000	323	atha|NP_172955 | OG5_129038 | thioredoxin family protein [Arabidopsis thaliana]	528	312	1	196	289	214	5e-19	42.86	60
Locus_49894_Transcript_1/1_Confidence_1.000	730	atha|NP_173005 | OG5_126574 | PDR12 (PLEIOTROPIC DRUG RESISTANCE 12); ATPase, coupled to transmembrane movement of substances [Arabidopsis thaliana]	1423	728	132	1231	1423	468	2e-50	53.77	71.36
Locus_11065_Transcript_1/1_Confidence_1.000	268	atha|NP_173021 | OG5_128905 | AVP1; ATPase/ hydrogen-translocating pyrophosphatase [Arabidopsis thaliana]	770	3	206	703	770	321	1e-33	89.71	94.12
Locus_14177_Transcript_1/1_Confidence_1.000	1053	atha|NP_173048 | OG5_127097 | NRAMP6; inorganic anion transmembrane transporter/ metal ion transmembrane transporter [Arabidopsis thaliana]	527	1	531	312	488	554	2e-63	68.93	84.75
Locus_33527_Transcript_1/1_Confidence_1.000	378	atha|NP_173048 | OG5_127097 | NRAMP6; inorganic anion transmembrane transporter/ metal ion transmembrane transporter [Arabidopsis thaliana]	527	4	378	187	311	485	9e-57	72.8	86.4
Locus_50894_Transcript_1/1_Confidence_1.000	402	atha|NP_173063 | OG5_135469 | WAKL1 (wall associated kinase-like 1); kinase [Arabidopsis thaliana]	730	27	395	324	448	133	6e-08	34.62	50.77
Locus_2095_Transcript_1/1_Confidence_1.000	1666	atha|NP_173114 | OG5_128019 | NADH-ubiquinone oxidoreductase 23 kDa subunit, mitochondrial, putative [Arabidopsis thaliana]	222	1510	1016	58	222	759	8e-95	91.52	96.36
Locus_16010_Transcript_1/1_Confidence_1.000	719	atha|NP_173124 | OG5_128456 | tRNA-splicing endonuclease positive effector-related [Arabidopsis thaliana]	1939	708	10	1382	1611	735	3e-86	57.94	73.82
Locus_22684_Transcript_1/1_Confidence_1.000	264	atha|NP_173124 | OG5_128456 | tRNA-splicing endonuclease positive effector-related [Arabidopsis thaliana]	1939	248	6	1087	1166	201	4e-17	50.62	67.9
Locus_35016_Transcript_1/1_Confidence_1.000	462	atha|NP_173166 | OG5_127136 | ATP binding / protein binding / protein kinase/ protein serine/threonine kinase/ protein tyrosine kinase [Arabidopsis thaliana]	1101	4	462	155	304	301	1e-29	41.83	66.01
Locus_56751_Transcript_1/1_Confidence_1.000	328	atha|NP_173166 | OG5_127136 | ATP binding / protein binding / protein kinase/ protein serine/threonine kinase/ protein tyrosine kinase [Arabidopsis thaliana]	1101	5	295	451	545	186	5e-15	46.39	59.79
Locus_40269_Transcript_1/1_Confidence_1.000	224	atha|NP_173168 | OG5_133246 | AtRLP3 (Receptor Like Protein 3); protein binding / protein kinase [Arabidopsis thaliana]	756	223	2	325	398	117	2e-06	40.54	66.22
Locus_3286_Transcript_1/1_Confidence_1.000	888	atha|NP_173229 | OG5_170313 | EGY3 (ETHYLENE-DEPENDENT GRAVITROPISM-DEFICIENT AND YELLOW-GREEN-LIKE 3) [Arabidopsis thaliana]	573	328	2	65	184	213	4e-17	41.67	60.83
Locus_24388_Transcript_1/1_Confidence_1.000	1420	atha|NP_173263 | OG5_129214 | ketose-bisphosphate aldolase class-II family protein [Arabidopsis thaliana]	1373	1162	8	86	476	814	2e-94	46.94	65.82
Locus_928_Transcript_1/1_Confidence_1.000	1242	atha|NP_173308 | OG5_160022 | NDF6 (NDH DEPENDENT FLOW 6) [Arabidopsis thaliana]	175	837	505	59	159	216	2e-18	39.64	58.56
Locus_54859_Transcript_1/1_Confidence_1.000	546	atha|NP_173360 | OG5_133792 | hAT dimerisation domain-containing protein [Arabidopsis thaliana]	769	6	539	73	251	324	2e-32	42.16	57.84
Locus_43435_Transcript_1/1_Confidence_1.000	965	atha|NP_173478 | OG5_129737 | transducin family protein / WD-40 repeat family protein [Arabidopsis thaliana]	351	1	807	86	350	747	2e-94	53.7	74.81
Locus_12370_Transcript_1/1_Confidence_1.000	2252	atha|NP_173576 | OG5_130405 | zinc finger (CCCH-type) family protein [Arabidopsis thaliana]	470	95	1441	25	451	910	1e-111	45.32	59.69
Locus_19245_Transcript_1/1_Confidence_1.000	2551	atha|NP_173584 | OG5_128579 | ATP binding / protein binding [Arabidopsis thaliana]	1051	2551	494	372	1043	2041	0	57.45	74.38
Locus_12020_Transcript_1/1_Confidence_1.000	255	atha|NP_173589 | OG5_127525 | ATSWI3C (SWITCH/SUCROSE NONFERMENTING 3C); DNA binding [Arabidopsis thaliana]	807	3	131	617	659	155	3e-11	65.12	86.05
Locus_439_Transcript_1/1_Confidence_1.000	363	atha|NP_173594 | OG5_126843 | ATPDIL1-1 (PDI-LIKE 1-1); protein disulfide isomerase [Arabidopsis thaliana]	501	363	1	251	368	205	1e-17	38.84	54.55
Locus_35763_Transcript_1/1_Confidence_1.000	854	atha|NP_173602 | OG5_137049 | UREF (urease accessory protein F); nickel ion binding [Arabidopsis thaliana]	240	151	828	15	240	660	2e-83	54.87	71.68
Locus_37440_Transcript_1/1_Confidence_1.000	1293	atha|NP_173666 | OG5_189774 | zinc finger (C3HC4-type RING finger) family protein [Arabidopsis thaliana]	381	426	214	113	183	169	4e-11	51.39	66.67
Locus_10617_Transcript_1/1_Confidence_1.000	1121	atha|NP_173675 | OG5_127860 | C2 domain-containing protein [Arabidopsis thaliana]	1029	399	833	296	431	140	2e-07	29.05	47.97
Locus_9644_Transcript_1/1_Confidence_1.000	1774	atha|NP_173676 | OG5_128217 | ATSAC1 (suppressor of actin 1); phosphatidylinositol-4,5-bisphosphate 5-phosphatase [Arabidopsis thaliana]	912	95	1111	483	815	871	6e-103	54.44	67.05
Locus_17104_Transcript_1/1_Confidence_1.000	984	atha|NP_173676 | OG5_128217 | ATSAC1 (suppressor of actin 1); phosphatidylinositol-4,5-bisphosphate 5-phosphatase [Arabidopsis thaliana]	912	522	983	18	171	587	2e-66	68.18	83.77
Locus_29966_Transcript_1/1_Confidence_1.000	1275	atha|NP_173731 | OG5_177532 | armadillo/beta-catenin repeat family protein [Arabidopsis thaliana]	834	759	1	94	350	543	2e-59	48.64	70.43
Locus_50550_Transcript_1/1_Confidence_1.000	380	atha|NP_173737 | OG5_168683 | unknown protein [Arabidopsis thaliana]	1615	2	193	83	146	186	1e-14	59.38	75
Locus_6250_Transcript_1/1_Confidence_1.000	2788	atha|NP_173823 | OG5_177538 | transducin family protein / WD-40 repeat family protein [Arabidopsis thaliana]	415	1417	2427	61	410	685	2e-78	48.45	63.38
Locus_71665_Transcript_1/1_Confidence_1.000	698	atha|NP_173862 | OG5_138669 | CYP86C1; electron carrier/ heme binding / iron ion binding / monooxygenase/ oxygen binding [Arabidopsis thaliana]	522	530	420	92	128	128	4e-07	62.16	72.97
Locus_13215_Transcript_1/1_Confidence_1.000	2857	atha|NP_173873 | OG5_143090 | ATMAP70-2 (microtubule-associated proteins 70-2); microtubule binding [Arabidopsis thaliana]	634	1118	2857	54	621	1709	0	65.53	78.78
Locus_26268_Transcript_1/1_Confidence_1.000	1722	atha|NP_173942 | OG5_130168 | binding / protein transporter [Arabidopsis thaliana]	1022	7	1137	645	1020	718	7e-81	41.84	65.79
Locus_13044_Transcript_1/1_Confidence_1.000	1354	atha|NP_173960 | OG5_189788 | MES13 (METHYL ESTERASE 13); hydrolase [Arabidopsis thaliana]	444	553	1317	184	442	550	2e-62	42.47	61.39
Locus_65839_Transcript_1/1_Confidence_1.000	785	atha|NP_173960 | OG5_189788 | MES13 (METHYL ESTERASE 13); hydrolase [Arabidopsis thaliana]	444	3	503	257	424	306	5e-30	40.35	57.31
Locus_34559_Transcript_1/1_Confidence_1.000	412	atha|NP_173961 | OG5_133104 | RNA helicase, putative [Arabidopsis thaliana]	717	140	412	2	92	222	2e-19	58.24	70.33
Locus_36755_Transcript_1/1_Confidence_1.000	695	atha|NP_174026 | OG5_175896 | regulator of chromosome condensation (RCC1) family protein [Arabidopsis thaliana]	386	669	70	207	378	355	2e-37	40	54
Locus_13165_Transcript_1/1_Confidence_1.000	2879	atha|NP_174027 | OG5_189793 | 5-AMP-activated protein kinase-related [Arabidopsis thaliana]	532	1690	2316	333	531	390	1e-37	39.52	59.52
Locus_51298_Transcript_1/2_Confidence_0.400	252	atha|NP_174037 | OG5_160079 | ATP binding / protein binding / transmembrane receptor [Arabidopsis thaliana]	1384	233	3	945	1022	171	3e-13	48.72	62.82
Locus_51298_Transcript_2/2_Confidence_0.467	253	atha|NP_174037 | OG5_160079 | ATP binding / protein binding / transmembrane receptor [Arabidopsis thaliana]	1384	233	3	945	1022	170	4e-13	48.72	62.82
Locus_14026_Transcript_1/7_Confidence_0.375	332	atha|NP_174038 | OG5_160079 | disease resistance protein (TIR-NBS-LRR class), putative [Arabidopsis thaliana]	1556	1	279	1131	1227	164	6e-12	39.8	59.18
Locus_14026_Transcript_3/7_Confidence_0.281	363	atha|NP_174038 | OG5_160079 | disease resistance protein (TIR-NBS-LRR class), putative [Arabidopsis thaliana]	1556	14	271	1135	1221	163	1e-11	42.05	62.5
Locus_14026_Transcript_5/7_Confidence_0.438	369	atha|NP_174038 | OG5_160079 | disease resistance protein (TIR-NBS-LRR class), putative [Arabidopsis thaliana]	1556	5	277	1130	1221	164	6e-12	40.86	62.37
Locus_14026_Transcript_7/7_Confidence_0.469	362	atha|NP_174038 | OG5_160079 | disease resistance protein (TIR-NBS-LRR class), putative [Arabidopsis thaliana]	1556	1	270	1131	1221	161	2e-11	40.22	61.96
Locus_3037_Transcript_1/1_Confidence_1.000	348	atha|NP_174089 | OG5_132565 | APL2 (ADPGLC-PPASE LARGE SUBUNIT); glucose-1-phosphate adenylyltransferase [Arabidopsis thaliana]	518	348	1	350	465	536	2e-64	81.9	93.97
Locus_66886_Transcript_1/1_Confidence_1.000	673	atha|NP_174089 | OG5_132565 | APL2 (ADPGLC-PPASE LARGE SUBUNIT); glucose-1-phosphate adenylyltransferase [Arabidopsis thaliana]	518	673	188	357	518	614	4e-74	66.67	83.95
Locus_11390_Transcript_1/1_Confidence_1.000	9616	atha|NP_174106 | OG5_177552 | unknown protein [Arabidopsis thaliana]	1148	503	946	17	170	237	2e-17	40	54.55
Locus_1074_Transcript_1/1_Confidence_1.000	273	atha|NP_174118 | OG5_127878 | NTF2B (NUCLEAR TRANSPORT FACTOR 2B); Ran GTPase binding / protein transporter [Arabidopsis thaliana]	126	270	1	28	117	387	7e-47	81.11	87.78
Locus_4505_Transcript_1/1_Confidence_1.000	2873	atha|NP_174156 | OG5_170335 | AtRLP4 (Receptor Like Protein 4); protein binding [Arabidopsis thaliana]	626	1726	8	24	598	1339	1e-170	46.72	63.28
Locus_23108_Transcript_1/1_Confidence_1.000	443	atha|NP_174220 | OG5_129648 | PEX7; peroxisome matrix targeting signal-2 binding / protein binding [Arabidopsis thaliana]	317	439	314	275	316	189	8e-16	80.95	90.48
Locus_46171_Transcript_1/1_Confidence_1.000	249	atha|NP_174286 | OG5_130559 | CAB1 (CHLOROPHYLL A/B BINDING PROTEIN 1); chlorophyll binding [Arabidopsis thaliana]	267	247	14	113	189	240	8e-24	57.69	74.36
Locus_66348_Transcript_1/1_Confidence_1.000	288	atha|NP_174314 | OG5_127390 | elongation factor 1-beta / EF-1-beta [Arabidopsis thaliana]	231	200	6	1	63	184	6e-16	50.77	78.46
Locus_36191_Transcript_1/1_Confidence_1.000	1778	atha|NP_174336 | OG5_129437 | DRT111; nucleic acid binding / nucleotide binding [Arabidopsis thaliana]	387	620	1654	84	385	637	3e-74	56.81	69.28
Locus_19620_Transcript_1/1_Confidence_1.000	1827	atha|NP_174408 | OG5_128063 | AK-HSDH I (ASPARTATE KINASE-HOMOSERINE DEHYDROGENASE I); aspartate kinase/ homoserine dehydrogenase [Arabidopsis thaliana]	911	1425	394	569	911	1144	1e-142	63.95	78.78
Locus_18485_Transcript_1/1_Confidence_1.000	1123	atha|NP_174434 | OG5_153259 | transferase family protein [Arabidopsis thaliana]	444	5	1090	115	433	197	9e-15	24.27	39.47
Locus_19459_Transcript_1/1_Confidence_1.000	484	atha|NP_174434 | OG5_153259 | transferase family protein [Arabidopsis thaliana]	444	448	101	315	435	124	1e-06	30.89	47.97
Locus_39282_Transcript_1/1_Confidence_1.000	586	atha|NP_174434 | OG5_153259 | transferase family protein [Arabidopsis thaliana]	444	556	29	26	200	266	2e-25	39.13	53.8
Locus_14075_Transcript_1/1_Confidence_1.000	870	atha|NP_174469 | OG5_131046 | AT-IE; phosphoribosyl-AMP cyclohydrolase/ phosphoribosyl-ATP diphosphatase [Arabidopsis thaliana]	281	818	165	51	279	767	8e-99	69.43	81.22
Locus_4493_Transcript_1/1_Confidence_1.000	451	atha|NP_174479 | OG5_132706 | STRS1 (STRESS RESPONSE SUPPRESSOR 1); ATP binding / ATP-dependent helicase/ helicase/ nucleic acid binding [Arabidopsis thaliana]	537	2	97	505	536	134	6e-08	84.38	90.62
Locus_17254_Transcript_1/1_Confidence_1.000	1289	atha|NP_174512 | OG5_130123 | NHL8; protein binding / zinc ion binding [Arabidopsis thaliana]	688	1	507	515	686	374	4e-37	48.85	71.84
Locus_35367_Transcript_1/1_Confidence_1.000	369	atha|NP_174523 | OG5_156419 | NRT1.5 (NITRATE TRANSPORTER 1.5); nitrate transmembrane transporter/ transporter [Arabidopsis thaliana]	614	3	362	298	414	230	7e-21	42.5	58.33
Locus_2327_Transcript_1/1_Confidence_1.000	1334	atha|NP_174530 | OG5_150263 | unknown protein [Arabidopsis thaliana]	239	951	430	67	239	684	9e-85	74.29	85.71
Locus_14393_Transcript_1/1_Confidence_1.000	1683	atha|NP_174601 | OG5_164399 | peptide chain release factor, putative [Arabidopsis thaliana]	257	588	1109	85	257	440	1e-47	56.32	73.56
Locus_58873_Transcript_1/1_Confidence_1.000	261	atha|NP_174624 | OG5_160133 | leucine-rich repeat family protein [Arabidopsis thaliana]	478	41	226	26	86	132	2e-08	46.03	53.97
Locus_35400_Transcript_1/1_Confidence_1.000	351	atha|NP_174628 | OG5_160133 | leucine-rich repeat family protein [Arabidopsis thaliana]	455	26	349	119	220	178	4e-14	38.89	59.26
Locus_11740_Transcript_1/1_Confidence_1.000	2839	atha|NP_174638 | OG5_131289 | unknown protein [Arabidopsis thaliana]	325	1371	1991	98	304	243	4e-20	31.75	47.87
Locus_12884_Transcript_1/1_Confidence_1.000	285	atha|NP_174661 | OG5_177568 | MES14 (METHYL ESTERASE 14); hydrolase [Arabidopsis thaliana]	348	1	285	101	194	204	2e-18	50.53	69.47
Locus_5330_Transcript_1/1_Confidence_1.000	1785	atha|NP_174703 | OG5_134960 | EMB3003 (embryo defective 3003); acyltransferase/ dihydrolipoyllysine-residue acetyltransferase/ protein binding [Arabidopsis thaliana]	465	698	1612	178	465	1058	1e-135	73.86	80.72
Locus_23386_Transcript_1/1_Confidence_1.000	482	atha|NP_174809 | OG5_127136 | leucine-rich repeat transmembrane protein kinase, putative [Arabidopsis thaliana]	1120	479	6	154	288	286	2e-27	46.2	56.33
Locus_1448_Transcript_1/1_Confidence_1.000	633	atha|NP_174996 | OG5_126628 | GAPB (GLYCERALDEHYDE-3-PHOSPHATE DEHYDROGENASE B SUBUNIT); glyceraldehyde-3-phosphate dehydrogenase (NADP+)/ glyceraldehyde-3-phosphate dehydrogenase [Arabidopsis thaliana]	447	633	346	325	421	371	1e-39	82.47	89.69
Locus_4871_Transcript_1/1_Confidence_1.000	455	atha|NP_174996 | OG5_126628 | GAPB (GLYCERALDEHYDE-3-PHOSPHATE DEHYDROGENASE B SUBUNIT); glyceraldehyde-3-phosphate dehydrogenase (NADP+)/ glyceraldehyde-3-phosphate dehydrogenase [Arabidopsis thaliana]	447	455	3	253	403	561	4e-68	94.04	97.35
Locus_32792_Transcript_1/1_Confidence_1.000	317	atha|NP_175046 | OG5_160002 | scpl44 (serine carboxypeptidase-like 44); serine-type carboxypeptidase [Arabidopsis thaliana]	479	3	317	54	157	393	4e-44	70.48	80.95
Locus_13471_Transcript_1/1_Confidence_1.000	1540	atha|NP_175166 | OG5_126632 | unknown protein [Arabidopsis thaliana]	527	8	970	230	509	389	7e-39	40.5	57.01
Locus_16096_Transcript_1/1_Confidence_1.000	1563	atha|NP_175198 | OG5_177579 | amino acid transporter family protein [Arabidopsis thaliana]	519	520	2	6	141	385	2e-38	47.98	59.54
Locus_23166_Transcript_1/1_Confidence_1.000	1156	atha|NP_175266 | OG5_137382 | thioesterase family protein [Arabidopsis thaliana]	156	386	865	2	144	291	5e-29	42.5	58.13
Locus_54023_Transcript_1/1_Confidence_1.000	1414	atha|NP_175291 | OG5_212026 | unknown protein [Arabidopsis thaliana]	454	301	2	78	192	139	3e-07	33.33	46.67
Locus_48732_Transcript_1/1_Confidence_1.000	251	atha|NP_175343 | OG5_129681 | unknown protein [Arabidopsis thaliana]	126	1	168	69	124	162	1e-13	53.57	78.57
Locus_3414_Transcript_1/1_Confidence_1.000	850	atha|NP_175390 | OG5_130667 | NQR; binding / catalytic/ oxidoreductase/ zinc ion binding [Arabidopsis thaliana]	629	849	610	541	620	246	3e-21	58.75	75
Locus_20882_Transcript_1/1_Confidence_1.000	685	atha|NP_175390 | OG5_130667 | NQR; binding / catalytic/ oxidoreductase/ zinc ion binding [Arabidopsis thaliana]	629	2	685	318	544	771	4e-96	71.18	83.84
Locus_37444_Transcript_1/1_Confidence_1.000	551	atha|NP_175399 | OG5_153265 | RGE1 (RETARDED GROWTH OF EMBRYO 1); DNA binding / transcription factor [Arabidopsis thaliana]	308	330	551	59	132	222	6e-20	60.81	72.97
Locus_927_Transcript_1/1_Confidence_1.000	2381	atha|NP_175460 | OG5_133058 | DWF5 (DWARF 5); sterol delta7 reductase [Arabidopsis thaliana]	432	429	1715	4	432	1629	0	68.76	80.65
Locus_7048_Transcript_1/1_Confidence_1.000	1455	atha|NP_175552 | OG5_127062 | cinnamyl-alcohol dehydrogenase, putative (CAD) [Arabidopsis thaliana]	325	126	1103	6	318	706	2e-86	46.01	65.64
Locus_55338_Transcript_1/1_Confidence_1.000	368	atha|NP_175592 | OG5_129501 | leucine-rich repeat protein kinase, putative [Arabidopsis thaliana]	884	8	193	796	856	128	2e-07	45.16	64.52
Locus_27702_Transcript_1/1_Confidence_1.000	753	atha|NP_175598 | OG5_129501 | leucine-rich repeat protein kinase, putative [Arabidopsis thaliana]	890	3	749	172	398	124	6e-06	25.88	43.14
Locus_10573_Transcript_1/1_Confidence_1.000	567	atha|NP_175600 | OG5_129501 | leucine-rich repeat protein kinase, putative [Arabidopsis thaliana]	880	566	357	780	849	143	8e-09	40	58.57
Locus_10220_Transcript_1/1_Confidence_1.000	2139	atha|NP_175736 | OG5_147194 | galactosyltransferase family protein [Arabidopsis thaliana]	345	1158	358	74	340	997	1e-126	67.04	82.4
Locus_32479_Transcript_1/1_Confidence_1.000	675	atha|NP_175779 | OG5_134513 | unknown protein [Arabidopsis thaliana]	272	350	6	1	118	199	1e-16	36.13	59.66
Locus_24908_Transcript_1/1_Confidence_1.000	254	atha|NP_175839 | OG5_126729 | NHX5; sodium ion transmembrane transporter/ sodium:hydrogen antiporter [Arabidopsis thaliana]	521	3	254	265	348	348	4e-38	78.57	90.48
Locus_1260_Transcript_1/1_Confidence_1.000	1633	atha|NP_175900 | OG5_127482 | LOX1; lipoxygenase [Arabidopsis thaliana]	859	1247	3	11	419	783	2e-91	42.28	57.72
Locus_40474_Transcript_1/1_Confidence_1.000	290	atha|NP_175900 | OG5_127482 | LOX1; lipoxygenase [Arabidopsis thaliana]	859	23	289	329	416	212	1e-18	46.67	61.11
Locus_57890_Transcript_1/1_Confidence_1.000	605	atha|NP_175925 | OG5_164422 | oxidoreductase, 2OG-Fe(II) oxygenase family protein [Arabidopsis thaliana]	361	69	599	33	199	157	8e-11	30.56	47.22
Locus_19408_Transcript_1/1_Confidence_1.000	302	atha|NP_175980 | OG5_146966 | SEC14 cytosolic factor (SEC14) / phosphoglyceride transfer protein [Arabidopsis thaliana]	325	1	297	19	117	369	7e-42	69.7	78.79
Locus_8515_Transcript_1/1_Confidence_1.000	1084	atha|NP_175984 | OG5_132918 | pyridoxal-5-phosphate-dependent enzyme, beta family protein [Arabidopsis thaliana]	421	75	1082	29	384	1287	2e-174	71.91	83.43
Locus_20749_Transcript_1/1_Confidence_1.000	1241	atha|NP_175986 | OG5_128978 | TIM50 [Arabidopsis thaliana]	376	1236	562	151	375	726	1e-89	60.44	80.44
Locus_29251_Transcript_1/1_Confidence_1.000	792	atha|NP_175996 | OG5_150167 | amine oxidase-related [Arabidopsis thaliana]	384	789	16	124	377	629	4e-77	47.67	66.67
Locus_4353_Transcript_1/1_Confidence_1.000	1187	atha|NP_176033 | OG5_140005 | PAP6 (PURPLE ACID PHOSPHATASE 6); acid phosphatase/ protein serine/threonine phosphatase [Arabidopsis thaliana]	466	1184	186	108	452	866	1e-109	50.14	64.47
Locus_36398_Transcript_1/1_Confidence_1.000	1113	atha|NP_176052 | OG5_129247 | clathrin adaptor complexes medium subunit family protein [Arabidopsis thaliana]	415	1113	124	86	414	1083	2e-143	64.85	83.64
Locus_20780_Transcript_1/1_Confidence_1.000	470	atha|NP_176103 | OG5_126805 | helicase domain-containing protein [Arabidopsis thaliana]	1459	2	469	121	263	132	1e-07	32.7	51.57
Locus_28678_Transcript_1/1_Confidence_1.000	1999	atha|NP_176103 | OG5_126805 | helicase domain-containing protein [Arabidopsis thaliana]	1459	1	1572	933	1455	1553	0	56.17	73.43
Locus_9867_Transcript_1/1_Confidence_1.000	3437	atha|NP_176121 | OG5_164319 | SAB (SABRE) [Arabidopsis thaliana]	2603	3	2000	1872	2568	1303	3e-150	48.77	61.1
Locus_67669_Transcript_1/1_Confidence_1.000	624	atha|NP_176183 | OG5_160132 | proton-dependent oligopeptide transport (POT) family protein [Arabidopsis thaliana]	591	593	12	18	210	352	1e-36	38.46	60
Locus_26197_Transcript_1/1_Confidence_1.000	599	atha|NP_176225 | OG5_164371 | armadillo/beta-catenin repeat family protein / U-box domain-containing protein [Arabidopsis thaliana]	686	197	595	210	342	193	5e-15	34.03	53.47
Locus_25065_Transcript_1/1_Confidence_1.000	379	atha|NP_176274 | OG5_127872 | oxidoreductase [Arabidopsis thaliana]	330	3	377	76	200	490	3e-59	71.2	84
Locus_2028_Transcript_1/1_Confidence_1.000	328	atha|NP_176347 | OG5_147198 | LHCA3; chlorophyll binding [Arabidopsis thaliana]	273	158	3	31	84	193	6e-17	74.07	81.48
Locus_4476_Transcript_1/1_Confidence_1.000	315	atha|NP_176352 | OG5_126874 | RPL3B (R-PROTEIN L3 B); structural constituent of ribosome [Arabidopsis thaliana]	390	132	1	1	44	206	2e-18	88.64	90.91
Locus_67952_Transcript_1/1_Confidence_1.000	554	atha|NP_176427 | OG5_164432 | zinc finger (C3HC4-type RING finger) family protein [Arabidopsis thaliana]	204	293	529	116	201	143	1e-09	34.88	47.67
Locus_27440_Transcript_1/1_Confidence_1.000	492	atha|NP_176478 | OG5_141403 | O-methyltransferase, putative [Arabidopsis thaliana]	205	1	228	129	205	143	1e-09	37.66	64.94
Locus_23603_Transcript_1/1_Confidence_1.000	2285	atha|NP_176490 | OG5_153272 | NRPD1A (NUCLEAR RNA POLYMERASE D 1A); DNA binding / DNA-directed RNA polymerase [Arabidopsis thaliana]	1453	2141	510	939	1419	417	4e-40	26.94	43.94
Locus_32254_Transcript_1/1_Confidence_1.000	601	atha|NP_176511 | OG5_150084 | C2 domain-containing protein [Arabidopsis thaliana]	147	39	398	1	124	220	2e-20	34.68	60.48
Locus_33048_Transcript_1/1_Confidence_1.000	859	atha|NP_176621 | OG5_131283 | AtGH9C2 (Arabidopsis thaliana glycosyl hydrolase 9C2); carbohydrate binding / catalytic/ hydrolase, hydrolyzing O-glycosyl compounds	620	63	326	530	614	169	2e-11	39.77	57.95
Locus_69390_Transcript_1/1_Confidence_1.000	612	atha|NP_176654 | OG5_126605 | TUA1 (ALPHA-1 TUBULIN); structural constituent of cytoskeleton [Arabidopsis thaliana]	450	532	407	290	331	121	6e-06	54.76	71.43
Locus_22979_Transcript_1/1_Confidence_1.000	1807	atha|NP_176658 | OG5_126686 | ATAMT1;2 (AMMONIUM TRANSPORTER 1;2); ammonium transmembrane transporter [Arabidopsis thaliana]	514	32	961	204	511	798	4e-96	68.81	78.14
Locus_71142_Transcript_1/1_Confidence_1.000	1005	atha|NP_176658 | OG5_126686 | ATAMT1;2 (AMMONIUM TRANSPORTER 1;2); ammonium transmembrane transporter [Arabidopsis thaliana]	514	1005	157	216	510	734	3e-90	65.88	79.39
Locus_53613_Transcript_1/1_Confidence_1.000	465	atha|NP_176663 | OG5_177611 | aspartyl protease family protein [Arabidopsis thaliana]	431	79	465	25	134	219	3e-19	37.21	52.71
Locus_70991_Transcript_1/1_Confidence_1.000	265	atha|NP_176676 | OG5_133359 | binding [Arabidopsis thaliana]	1203	263	6	167	252	258	7e-25	54.65	77.91
Locus_2613_Transcript_1/1_Confidence_1.000	1989	atha|NP_176711 | OG5_189900 | CBS domain-containing protein [Arabidopsis thaliana]	425	1075	2	1	371	447	1e-46	34.28	52.06
Locus_14773_Transcript_1/1_Confidence_1.000	1294	atha|NP_176757 | OG5_164436 | tRNA-splicing endonuclease positive effector-related [Arabidopsis thaliana]	1050	1	1215	322	680	442	3e-45	34.79	50.36
Locus_2841_Transcript_1/1_Confidence_1.000	543	atha|NP_176758 | OG5_129987 | microsomal glutathione s-transferase, putative [Arabidopsis thaliana]	146	410	541	11	54	146	3e-10	56.82	72.73
Locus_1138_Transcript_1/1_Confidence_1.000	1454	atha|NP_176766 | OG5_139552 | anac028 (Arabidopsis NAC domain containing protein 28); transcription factor [Arabidopsis thaliana]	631	433	909	6	165	556	3e-61	64.6	75.78
Locus_2204_Transcript_1/1_Confidence_1.000	610	atha|NP_176829 | OG5_160064 | WRKY64; transcription factor [Arabidopsis thaliana]	249	500	610	102	138	135	4e-08	56.76	75.68
Locus_27931_Transcript_1/1_Confidence_1.000	917	atha|NP_176845 | OG5_189905 | ATP dependent DNA ligase family protein [Arabidopsis thaliana]	1417	695	916	744	817	256	4e-22	60.81	74.32
Locus_23019_Transcript_1/1_Confidence_1.000	361	atha|NP_176855 | OG5_160157 | leucine-rich repeat transmembrane protein kinase, putative [Arabidopsis thaliana]	685	354	193	217	273	143	3e-09	61.02	64.41
Locus_11126_Transcript_1/5_Confidence_0.250	572	atha|NP_176880 | OG5_130633 | RBCS1A (RIBULOSE BISPHOSPHATE CARBOXYLASE SMALL CHAIN 1A); copper ion binding / ribulose-bisphosphate carboxylase [Arabidopsis thaliana]	180	542	366	118	175	239	7e-23	71.19	83.05
Locus_11126_Transcript_2/5_Confidence_0.250	562	atha|NP_176880 | OG5_130633 | RBCS1A (RIBULOSE BISPHOSPHATE CARBOXYLASE SMALL CHAIN 1A); copper ion binding / ribulose-bisphosphate carboxylase [Arabidopsis thaliana]	180	542	366	118	175	239	6e-23	71.19	83.05
Locus_11126_Transcript_3/5_Confidence_0.375	559	atha|NP_176880 | OG5_130633 | RBCS1A (RIBULOSE BISPHOSPHATE CARBOXYLASE SMALL CHAIN 1A); copper ion binding / ribulose-bisphosphate carboxylase [Arabidopsis thaliana]	180	542	366	118	175	239	6e-23	71.19	83.05
Locus_11126_Transcript_4/5_Confidence_0.250	567	atha|NP_176880 | OG5_130633 | RBCS1A (RIBULOSE BISPHOSPHATE CARBOXYLASE SMALL CHAIN 1A); copper ion binding / ribulose-bisphosphate carboxylase [Arabidopsis thaliana]	180	542	366	118	175	239	6e-23	71.19	83.05
Locus_11126_Transcript_5/5_Confidence_0.375	546	atha|NP_176880 | OG5_130633 | RBCS1A (RIBULOSE BISPHOSPHATE CARBOXYLASE SMALL CHAIN 1A); copper ion binding / ribulose-bisphosphate carboxylase [Arabidopsis thaliana]	180	545	366	117	175	246	7e-24	71.67	83.33
Locus_51401_Transcript_1/1_Confidence_1.000	971	atha|NP_176889 | OG5_189072 | zinc finger (C3HC4-type RING finger) family protein / BRCT domain-containing protein [Arabidopsis thaliana]	453	260	54	300	369	173	6e-12	47.89	70.42
Locus_38738_Transcript_1/1_Confidence_1.000	400	atha|NP_176917 | OG5_128651 | ATREV3 (ARABIDOPSIS THALIANA RECOVERY PROTEIN 3); DNA binding / DNA-directed DNA polymerase [Arabidopsis thaliana]	1890	361	110	238	324	157	7e-11	39.08	56.32
Locus_44432_Transcript_1/1_Confidence_1.000	318	atha|NP_176917 | OG5_128651 | ATREV3 (ARABIDOPSIS THALIANA RECOVERY PROTEIN 3); DNA binding / DNA-directed DNA polymerase [Arabidopsis thaliana]	1890	309	4	96	198	324	3e-33	51.46	77.67
Locus_39043_Transcript_1/1_Confidence_1.000	1478	atha|NP_176961 | OG5_130152 | ATNAP3; transporter [Arabidopsis thaliana]	263	20	778	14	263	759	4e-95	58.5	79.05
Locus_22874_Transcript_1/1_Confidence_1.000	661	atha|NP_176998 | OG5_127914 | vacuolar sorting signal binding [Arabidopsis thaliana]	159	2	97	128	159	125	5e-07	78.12	87.5
Locus_30980_Transcript_1/1_Confidence_1.000	1379	atha|NP_177109 | OG5_126554 | electron carrier/ heme binding / iron ion binding / monooxygenase/ oxygen binding [Arabidopsis thaliana]	524	66	593	335	516	537	1e-59	53.85	70.33
Locus_49845_Transcript_1/1_Confidence_1.000	374	atha|NP_177109 | OG5_126554 | electron carrier/ heme binding / iron ion binding / monooxygenase/ oxygen binding [Arabidopsis thaliana]	524	373	173	458	524	195	3e-16	56.34	70.42
Locus_53787_Transcript_1/1_Confidence_1.000	377	atha|NP_177109 | OG5_126554 | electron carrier/ heme binding / iron ion binding / monooxygenase/ oxygen binding [Arabidopsis thaliana]	524	375	100	432	523	334	2e-35	63.04	78.26
Locus_73375_Transcript_1/1_Confidence_1.000	420	atha|NP_177109 | OG5_126554 | electron carrier/ heme binding / iron ion binding / monooxygenase/ oxygen binding [Arabidopsis thaliana]	524	26	418	273	394	185	1e-14	33.59	54.2
Locus_70262_Transcript_1/1_Confidence_1.000	256	atha|NP_177131 | OG5_135469 | protein kinase family protein [Arabidopsis thaliana]	792	3	254	548	631	182	7e-15	40.48	61.9
Locus_18786_Transcript_1/1_Confidence_1.000	442	atha|NP_177188 | OG5_127074 | SPDS2 (spermidine synthase 2); spermidine synthase [Arabidopsis thaliana]	340	442	2	61	207	585	6e-73	76.87	92.52
Locus_3661_Transcript_1/1_Confidence_1.000	3911	atha|NP_177278 | OG5_127935 | EBS1 (EMS-mutagenized bri1 suppressor 1); UDP-glucose:glycoprotein glucosyltransferase/ transferase, transferring glycosyl groups / transferase, transferring hexosyl groups [Arabidopsis thaliana]	1613	3868	260	422	1613	3333	0	54.95	71.7
Locus_19001_Transcript_1/1_Confidence_1.000	416	atha|NP_177290 | OG5_127726 | glycerophosphoryl diester phosphodiesterase family protein [Arabidopsis thaliana]	328	414	4	93	229	338	1e-36	41.61	68.61
Locus_29911_Transcript_1/1_Confidence_1.000	292	atha|NP_177315 | OG5_127835 | ATCK1 (CHOLINE KINASE 1); choline kinase [Arabidopsis thaliana]	346	291	1	146	242	303	4e-32	56.7	76.29
Locus_4645_Transcript_1/1_Confidence_1.000	3643	atha|NP_177365 | OG5_189774 | zinc finger (C3HC4-type RING finger) family protein [Arabidopsis thaliana]	404	2594	2028	56	227	406	4e-40	42.93	59.69
Locus_8789_Transcript_1/1_Confidence_1.000	1018	atha|NP_177398 | OG5_189935 | protein kinase, putative [Arabidopsis thaliana]	450	17	256	312	395	124	9e-06	36.9	54.76
Locus_32796_Transcript_1/1_Confidence_1.000	760	atha|NP_177401 | OG5_135471 | DNA binding / transcription factor [Arabidopsis thaliana]	415	51	452	248	385	137	8e-08	34.69	46.26
Locus_26488_Transcript_1/3_Confidence_0.526	426	atha|NP_177451 | OG5_127136 | PEPR1 (PEP1 receptor 1); ATP binding / kinase/ protein binding / protein serine/threonine kinase [Arabidopsis thaliana]	1123	1	423	97	216	157	9e-11	33.79	48.97
Locus_26488_Transcript_2/3_Confidence_0.632	427	atha|NP_177451 | OG5_127136 | PEPR1 (PEP1 receptor 1); ATP binding / kinase/ protein binding / protein serine/threonine kinase [Arabidopsis thaliana]	1123	2	424	97	216	161	2e-11	34.48	48.97
Locus_26488_Transcript_3/3_Confidence_0.632	427	atha|NP_177451 | OG5_127136 | PEPR1 (PEP1 receptor 1); ATP binding / kinase/ protein binding / protein serine/threonine kinase [Arabidopsis thaliana]	1123	2	424	97	216	157	9e-11	33.79	48.97
Locus_378_Transcript_1/1_Confidence_1.000	1297	atha|NP_177507 | OG5_130251 | protein kinase family protein [Arabidopsis thaliana]	1030	1295	621	788	1012	1005	1e-123	79.11	91.11
Locus_5829_Transcript_1/1_Confidence_1.000	2454	atha|NP_177507 | OG5_130251 | protein kinase family protein [Arabidopsis thaliana]	1030	734	2077	126	556	747	1e-82	41.29	56.13
Locus_31703_Transcript_1/1_Confidence_1.000	429	atha|NP_177512 | OG5_212133 | pentatricopeptide (PPR) repeat-containing protein [Arabidopsis thaliana]	991	397	8	451	582	188	8e-15	35.07	52.99
Locus_48684_Transcript_1/1_Confidence_1.000	376	atha|NP_177512 | OG5_212133 | pentatricopeptide (PPR) repeat-containing protein [Arabidopsis thaliana]	991	371	6	323	444	270	6e-26	42.62	61.48
Locus_4681_Transcript_1/1_Confidence_1.000	1225	atha|NP_177538 | OG5_150260 | phosphoribulokinase/uridine kinase family protein [Arabidopsis thaliana]	643	1132	575	481	643	180	3e-12	32.8	49.21
Locus_7591_Transcript_1/1_Confidence_1.000	2861	atha|NP_177617 | OG5_130382 | catalytic [Arabidopsis thaliana]	695	2647	710	23	646	1524	0	46.92	64.15
Locus_2287_Transcript_1/1_Confidence_1.000	3975	atha|NP_177638 | OG5_189950 | ARC3 (ACCUMULATION AND REPLICATION OF CHLOROPLASTS 3) [Arabidopsis thaliana]	741	1020	3242	68	739	821	4e-92	31.13	49.29
Locus_73129_Transcript_1/1_Confidence_1.000	292	atha|NP_177681 | OG5_212140 | DNA binding / transcription factor [Arabidopsis thaliana]	206	290	87	50	111	170	4e-14	51.47	64.71
Locus_45712_Transcript_1/1_Confidence_1.000	265	atha|NP_177694 | OG5_155063 | leucine-rich repeat family protein / protein kinase family protein [Arabidopsis thaliana]	1140	201	10	174	237	169	5e-13	54.69	68.75
Locus_35218_Transcript_1/1_Confidence_1.000	1030	atha|NP_177732 | OG5_126865 | pseudouridine synthase family protein [Arabidopsis thaliana]	313	598	2	63	245	436	2e-48	48.74	60.8
Locus_18077_Transcript_1/1_Confidence_1.000	2471	atha|NP_177741 | OG5_129295 | serine-type endopeptidase/ serine-type peptidase [Arabidopsis thaliana]	795	51	2228	70	795	2676	0	67.72	81.32
Locus_63873_Transcript_1/1_Confidence_1.000	375	atha|NP_177856 | OG5_128953 | MEI1 (meiosis defective 1); transcription coactivator [Arabidopsis thaliana]	972	359	120	206	281	177	1e-13	45	66.25
Locus_11955_Transcript_1/1_Confidence_1.000	2022	atha|NP_177873 | OG5_137916 | TAPX (THYLAKOIDAL ASCORBATE PEROXIDASE); L-ascorbate peroxidase [Arabidopsis thaliana]	426	381	1448	57	398	1227	2e-160	66.95	78.15
Locus_2015_Transcript_1/1_Confidence_1.000	2350	atha|NP_177978 | OG5_127949 | RHM1 (RHAMNOSE BIOSYNTHESIS 1); UDP-L-rhamnose synthase/ UDP-glucose 4,6-dehydratase/ catalytic [Arabidopsis thaliana]	669	192	2210	2	669	2942	0	80.24	88.86
Locus_6195_Transcript_1/1_Confidence_1.000	1280	atha|NP_178019 | OG5_137067 | SRF5 (STRUBBELIG-RECEPTOR FAMILY 5); ATP binding / kinase/ protein serine/threonine kinase [Arabidopsis thaliana]	699	476	3	8	166	310	1e-28	44.65	60.38
Locus_21078_Transcript_1/1_Confidence_1.000	684	atha|NP_178036 | OG5_128754 | binding [Arabidopsis thaliana]	830	681	487	675	740	158	2e-10	48.48	66.67
Locus_398_Transcript_1/1_Confidence_1.000	1289	atha|NP_178051 | OG5_147205 | ATMC5 (ARABIDOPSIS THALIANA METACASPASE 5); cysteine-type endopeptidase [Arabidopsis thaliana]	410	15	1289	1	410	810	2e-101	46.53	62.04
Locus_6783_Transcript_1/1_Confidence_1.000	897	atha|NP_178053 | OG5_129178 | EMB1135 (embryo defective 1135); DNA binding / protein binding / zinc ion binding [Arabidopsis thaliana]	1299	895	8	611	915	900	5e-109	58.96	74.27
Locus_33787_Transcript_1/1_Confidence_1.000	243	atha|NP_178053 | OG5_129178 | EMB1135 (embryo defective 1135); DNA binding / protein binding / zinc ion binding [Arabidopsis thaliana]	1299	1	102	1176	1209	99	3e-08	55.88	76.47
Locus_19449_Transcript_1/1_Confidence_1.000	1230	atha|NP_178064 | OG5_141657 | GA2 (GA REQUIRING 2); ent-kaurene synthase [Arabidopsis thaliana]	785	1	891	480	777	452	2e-47	32.56	55.81
Locus_5862_Transcript_1/1_Confidence_1.000	329	atha|NP_178079 | OG5_126729 | sodium proton exchanger, putative (NHX6) [Arabidopsis thaliana]	535	85	327	19	99	241	1e-22	75.31	85.19
Locus_12397_Transcript_1/1_Confidence_1.000	1279	atha|NP_178079 | OG5_126729 | sodium proton exchanger, putative (NHX6) [Arabidopsis thaliana]	535	1	474	349	503	358	2e-35	56.6	72.96
Locus_34194_Transcript_1/1_Confidence_1.000	751	atha|NP_178079 | OG5_126729 | sodium proton exchanger, putative (NHX6) [Arabidopsis thaliana]	535	750	268	85	244	497	2e-56	73.91	81.99
Locus_45848_Transcript_1/1_Confidence_1.000	789	atha|NP_178079 | OG5_126729 | sodium proton exchanger, putative (NHX6) [Arabidopsis thaliana]	535	741	85	223	441	543	7e-63	52.97	69.41
Locus_55702_Transcript_1/1_Confidence_1.000	380	atha|NP_178107 | OG5_127999 | helicase-related [Arabidopsis thaliana]	882	110	379	228	316	141	7e-13	44.44	60
Locus_26872_Transcript_1/1_Confidence_1.000	284	atha|NP_178125 | OG5_189973 | TMM (TOO MANY MOUTHS); protein binding / receptor [Arabidopsis thaliana]	496	270	22	224	312	142	1e-09	41.57	64.04
Locus_20554_Transcript_1/1_Confidence_1.000	665	atha|NP_178163 | OG5_127264 | PTAC17 (PLASTID TRANSCRIPTIONALLY ACTIVE17) [Arabidopsis thaliana]	444	194	487	347	444	357	2e-37	65.31	79.59
Locus_8947_Transcript_1/1_Confidence_1.000	1836	atha|NP_178216 | OG5_156448 | myb family transcription factor [Arabidopsis thaliana]	286	1731	1264	9	165	570	1e-65	71.52	84.18
Locus_10744_Transcript_1/1_Confidence_1.000	1045	atha|NP_178255 | OG5_177654 | ATP binding / kinase [Arabidopsis thaliana]	962	1045	443	767	962	502	2e-54	54.63	66.83
Locus_9079_Transcript_1/1_Confidence_1.000	460	atha|NP_178286 | OG5_129047 | VIT1 (vacuolar iron transporter 1); iron ion transmembrane transporter [Arabidopsis thaliana]	250	350	460	23	59	175	5e-14	86.49	94.59
Locus_28075_Transcript_1/1_Confidence_1.000	407	atha|NP_178286 | OG5_129047 | VIT1 (vacuolar iron transporter 1); iron ion transmembrane transporter [Arabidopsis thaliana]	250	111	1	23	59	173	6e-14	86.49	94.59
Locus_1073_Transcript_1/1_Confidence_1.000	580	atha|NP_178297 | OG5_129627 | PAP7 (PURPLE ACID PHOSPHATASE 7); acid phosphatase/ protein serine/threonine phosphatase [Arabidopsis thaliana]	328	14	202	263	323	144	4e-09	46.03	66.67
Locus_20509_Transcript_1/1_Confidence_1.000	734	atha|NP_178297 | OG5_129627 | PAP7 (PURPLE ACID PHOSPHATASE 7); acid phosphatase/ protein serine/threonine phosphatase [Arabidopsis thaliana]	328	274	2	2	101	137	7e-08	32	48
Locus_18788_Transcript_1/1_Confidence_1.000	532	atha|NP_178311 | OG5_126717 | proton-dependent oligopeptide transport (POT) family protein [Arabidopsis thaliana]	545	517	2	59	230	270	9e-26	36.05	53.49
Locus_4647_Transcript_1/1_Confidence_1.000	1634	atha|NP_178351 | OG5_132765 | AL6 (ALFIN-LIKE 6); DNA binding / methylated histone residue binding [Arabidopsis thaliana]	256	685	828	204	254	178	1e-12	62.75	76.47
Locus_9561_Transcript_1/1_Confidence_1.000	1425	atha|NP_178389 | OG5_131875 | SUT2 (SUCROSE TRANSPORTER 2); carbohydrate transmembrane transporter/ sucrose transmembrane transporter/ sucrose:hydrogen symporter/ sugar:hydrogen symporter [Arabidopsis thaliana]	594	495	1385	9	298	922	3e-115	61.62	74.75
Locus_12689_Transcript_1/1_Confidence_1.000	557	atha|NP_178399 | OG5_128552 | RNS1 (RIBONUCLEASE 1); endoribonuclease/ ribonuclease [Arabidopsis thaliana]	230	379	2	29	156	411	9e-48	57.03	69.53
Locus_2187_Transcript_1/1_Confidence_1.000	5636	atha|NP_178413 | OG5_164450 | CAAX amino terminal protease family protein [Arabidopsis thaliana]	1805	81	2819	106	977	1020	6e-111	33.4	50.52
Locus_11926_Transcript_1/1_Confidence_1.000	2123	atha|NP_178442 | OG5_126538 | ankyrin repeat family protein [Arabidopsis thaliana]	240	1142	1837	10	240	771	1e-94	64.22	77.16
Locus_14120_Transcript_1/1_Confidence_1.000	844	atha|NP_178547 | OG5_147208 | ferredoxin thioredoxin reductase catalytic beta chain family protein [Arabidopsis thaliana]	146	3	335	35	145	532	1e-65	86.49	91.89
Locus_14640_Transcript_1/1_Confidence_1.000	260	atha|NP_178634 | OG5_126691 | aconitate hydratase, cytoplasmic, putative / citrate hydro-lyase/aconitase, putative [Arabidopsis thaliana]	990	258	1	94	179	379	3e-41	77.91	88.37
Locus_25515_Transcript_1/1_Confidence_1.000	1712	atha|NP_178746 | OG5_159497 | SH3 domain-containing protein [Arabidopsis thaliana]	1196	1400	3	58	496	1189	4e-147	55.65	71.43
Locus_27550_Transcript_1/1_Confidence_1.000	534	atha|NP_178773 | OG5_127680 | ribosomal protein S12 mitochondrial family protein [Arabidopsis thaliana]	125	257	532	1	92	380	2e-44	77.17	88.04
Locus_35699_Transcript_1/1_Confidence_1.000	370	atha|NP_178773 | OG5_127680 | ribosomal protein S12 mitochondrial family protein [Arabidopsis thaliana]	125	3	95	94	124	131	8e-09	83.87	87.1
Locus_23_Transcript_1/1_Confidence_1.000	370	atha|NP_178793 | no_group | hydrogen ion transmembrane transporter/ hydrolase, acting on acid anhydrides, catalyzing transmembrane movement of substances [Arabidopsis thaliana]	158	369	22	22	133	136	3e-09	30.51	52.54
Locus_8475_Transcript_1/1_Confidence_1.000	602	atha|NP_178803 | OG5_212176 | 60S ribosomal protein L5 (RPL5) [Arabidopsis thaliana]	185	94	600	4	170	527	2e-65	64.33	75.44
Locus_38088_Transcript_1/1_Confidence_1.000	295	atha|NP_178804 | OG5_128504 | cytochrome b (MTCYB) (COB) (CYTB) [Arabidopsis thaliana]	393	260	168	203	234	107	8e-06	71.88	84.38
Locus_51604_Transcript_1/1_Confidence_1.000	281	atha|NP_178809 | no_group | unknown protein [Arabidopsis thaliana]	199	184	2	26	90	151	1e-11	47.69	69.23
Locus_36412_Transcript_1/1_Confidence_1.000	769	atha|NP_178811 | OG5_126561 | ATMRP11; ATPase, coupled to transmembrane movement of substances [Arabidopsis thaliana]	1251	769	467	515	615	283	5e-26	57.43	78.22
Locus_37177_Transcript_1/1_Confidence_1.000	211	atha|NP_179026 | OG5_132931 | CYP705A13; electron carrier/ heme binding / iron ion binding / monooxygenase/ oxygen binding [Arabidopsis thaliana]	518	14	211	279	351	160	3e-12	43.84	68.49
Locus_8953_Transcript_1/1_Confidence_1.000	845	atha|NP_179037 | OG5_133996 | PIP; aminopeptidase [Arabidopsis thaliana]	380	248	844	29	219	702	6e-88	67.34	79.9
Locus_11589_Transcript_1/1_Confidence_1.000	1017	atha|NP_179097 | OG5_170417 | unknown protein [Arabidopsis thaliana]	386	1015	593	235	380	351	1e-35	46.58	66.44
Locus_27929_Transcript_1/1_Confidence_1.000	439	atha|NP_179145 | OG5_127622 | NRPB3; DNA binding / DNA-directed RNA polymerase/ protein dimerization [Arabidopsis thaliana]	319	1	438	44	168	307	3e-32	47.95	62.33
Locus_29288_Transcript_1/1_Confidence_1.000	812	atha|NP_179230 | OG5_127385 | THY-1 (THYMIDYLATE SYNTHASE 1); dihydrofolate reductase/ thymidylate synthase [Arabidopsis thaliana]	519	331	810	18	177	469	2e-52	53.12	70.62
Locus_5257_Transcript_1/1_Confidence_1.000	1703	atha|NP_179241 | OG5_164461 | DNA binding / nucleic acid binding / protein binding / zinc ion binding [Arabidopsis thaliana]	1773	211	387	1309	1367	233	4e-18	66.1	77.97
Locus_28930_Transcript_1/1_Confidence_1.000	208	atha|NP_179241 | OG5_164461 | DNA binding / nucleic acid binding / protein binding / zinc ion binding [Arabidopsis thaliana]	1773	207	43	1087	1156	140	3e-09	48.57	58.57
Locus_35882_Transcript_1/1_Confidence_1.000	1101	atha|NP_179241 | OG5_164461 | DNA binding / nucleic acid binding / protein binding / zinc ion binding [Arabidopsis thaliana]	1773	893	3	807	1101	575	5e-63	47	66
Locus_9410_Transcript_1/3_Confidence_0.500	1081	atha|NP_179316 | OG5_128560 | EMB2762 (EMBRYO DEFECTIVE 2762) [Arabidopsis thaliana]	577	471	1	93	300	142	8e-08	22.12	42.79
Locus_9410_Transcript_2/3_Confidence_0.500	1092	atha|NP_179316 | OG5_128560 | EMB2762 (EMBRYO DEFECTIVE 2762) [Arabidopsis thaliana]	577	471	1	93	300	142	8e-08	22.12	42.79
Locus_9410_Transcript_3/3_Confidence_0.500	1073	atha|NP_179316 | OG5_128560 | EMB2762 (EMBRYO DEFECTIVE 2762) [Arabidopsis thaliana]	577	471	1	93	300	142	8e-08	22.12	42.79
Locus_6210_Transcript_1/1_Confidence_1.000	1353	atha|NP_179329 | OG5_127955 | HMG2 (3-HYDROXY-3-METHYLGLUTARYL-COA REDUCTASE 2); hydroxymethylglutaryl-CoA reductase [Arabidopsis thaliana]	562	1351	1124	480	555	314	2e-29	77.63	93.42
Locus_71693_Transcript_1/1_Confidence_1.000	375	atha|NP_179335 | OG5_170427 | MLO7 (MILDEW RESISTANCE LOCUS O 7); calmodulin binding [Arabidopsis thaliana]	542	179	370	19	82	162	1e-11	48.44	64.06
Locus_17197_Transcript_1/1_Confidence_1.000	279	atha|NP_179417 | OG5_128320 | ATCOAD (4-phosphopantetheine adenylyltransferase); nucleotidyltransferase/ pantetheine-phosphate adenylyltransferase [Arabidopsis thaliana]	176	139	279	14	60	125	5e-08	74.47	89.36
Locus_14022_Transcript_1/1_Confidence_1.000	2416	atha|NP_179461 | OG5_130843 | SCY1 (SecY Homolog 1); P-P-bond-hydrolysis-driven protein transmembrane transporter [Arabidopsis thaliana]	551	1910	501	74	547	1788	0	72.27	83.4
Locus_61055_Transcript_1/1_Confidence_1.000	342	atha|NP_179497 | OG5_210914 | SHT (SPERMIDINE HYDROXYCINNAMOYL TRANSFERASE); N-acyltransferase/ hydroxycinnamoyltransferase/ spermidine:caffeoyl CoA N-acyltransferase/ spermidine:coumaroyl CoA N-acyltransferase/ spermidine:feruloyl CoA N-acyltransferase/ spermidine:sinapoyl CoA N-acy	451	342	4	235	345	123	6e-07	31.3	48.7
Locus_28971_Transcript_1/1_Confidence_1.000	707	atha|NP_179539 | OG5_130095 | recA family protein [Arabidopsis thaliana]	430	353	706	50	167	366	1e-38	66.95	76.27
Locus_32952_Transcript_1/1_Confidence_1.000	1669	atha|NP_179583 | OG5_156455 | RNA-dependent RNA polymerase family protein [Arabidopsis thaliana]	977	1050	40	123	478	458	2e-46	35.62	51.78
Locus_11137_Transcript_1/1_Confidence_1.000	2146	atha|NP_179627 | OG5_156456 | MUR3 (MURUS 3); catalytic/ transferase, transferring glycosyl groups [Arabidopsis thaliana]	619	1176	1	20	437	966	2e-118	44.79	61.37
Locus_33390_Transcript_1/1_Confidence_1.000	1754	atha|NP_179656 | OG5_130700 | ATP binding / protein kinase/ protein serine/threonine kinase [Arabidopsis thaliana]	525	219	1373	143	525	865	4e-106	46.79	62.72
Locus_13222_Transcript_1/1_Confidence_1.000	477	atha|NP_179839 | OG5_130048 | catalytic/ transferase [Arabidopsis thaliana]	958	1	333	101	211	486	1e-65	75.68	87.39
Locus_30172_Transcript_1/1_Confidence_1.000	555	atha|NP_179839 | OG5_130048 | catalytic/ transferase [Arabidopsis thaliana]	958	478	311	881	936	201	4e-16	64.29	83.93
Locus_18104_Transcript_1/1_Confidence_1.000	830	atha|NP_179866 | OG5_128619 | ACS4 (1-AMINOCYCLOPROPANE-1-CARBOXYLATE SYNTHASE 4); 1-aminocyclopropane-1-carboxylate synthase [Arabidopsis thaliana]	474	485	3	8	167	440	2e-48	48.45	67.08
Locus_60011_Transcript_1/1_Confidence_1.000	589	atha|NP_179879 | OG5_126645 | calcium-transporting ATPase, plasma membrane-type, putative / Ca2+-ATPase, putative (ACA7) [Arabidopsis thaliana]	1015	588	283	626	730	323	5e-37	68.57	75.24
Locus_21954_Transcript_1/1_Confidence_1.000	2364	atha|NP_179919 | OG5_129164 | CLF (CURLY LEAF); transcription factor [Arabidopsis thaliana]	902	1193	2296	535	902	1234	1e-153	67.48	76.96
Locus_6977_Transcript_1/1_Confidence_1.000	981	atha|NP_179937 | OG5_139497 | MES7 (METHYL ESTERASE 7); hydrolase/ hydrolase, acting on ester bonds / methyl indole-3-acetate esterase/ methyl salicylate esterase [Arabidopsis thaliana]	260	439	738	8	111	140	5e-08	36.04	48.65
Locus_53631_Transcript_1/1_Confidence_1.000	715	atha|NP_179973 | OG5_132950 | leucine-rich repeat family protein / protein kinase family protein [Arabidopsis thaliana]	634	698	3	97	359	253	1e-22	30.94	46.76
Locus_29373_Transcript_1/1_Confidence_1.000	498	atha|NP_179974 | OG5_130967 | defense-related protein, putative [Arabidopsis thaliana]	251	210	1	6	75	189	1e-15	47.14	68.57
Locus_27193_Transcript_1/1_Confidence_1.000	767	atha|NP_179999 | OG5_190034 | ATPUP5; purine transmembrane transporter [Arabidopsis thaliana]	361	762	4	78	330	480	2e-55	54.94	71.15
Locus_1942_Transcript_1/1_Confidence_1.000	1834	atha|NP_180029 | OG5_170438 | unknown protein [Arabidopsis thaliana]	407	256	735	264	401	230	2e-18	36.65	54.04
Locus_14949_Transcript_1/1_Confidence_1.000	485	atha|NP_180099 | OG5_160168 | unknown protein [Arabidopsis thaliana]	545	471	4	283	437	420	1e-46	51.59	66.24
Locus_15530_Transcript_1/1_Confidence_1.000	1451	atha|NP_180122 | OG5_132427 | phosphate translocator-related [Arabidopsis thaliana]	347	350	1375	1	343	1350	0	78.43	87.17
Locus_26844_Transcript_1/1_Confidence_1.000	572	atha|NP_180150 | OG5_212227 | leucine-rich repeat transmembrane protein kinase, putative [Arabidopsis thaliana]	960	568	2	165	351	206	1e-16	38.74	57.07
Locus_13017_Transcript_1/1_Confidence_1.000	258	atha|NP_180151 | OG5_143061 | unknown protein [Arabidopsis thaliana]	987	7	258	379	462	181	1e-14	41.67	66.67
Locus_41212_Transcript_1/1_Confidence_1.000	635	atha|NP_180174 | OG5_190039 | Bet v I allergen family protein [Arabidopsis thaliana]	190	10	135	91	132	121	1e-10	52.38	76.19
Locus_8127_Transcript_1/1_Confidence_1.000	1394	atha|NP_180187 | OG5_156465 | IQD6 (IQ-domain 6); calmodulin binding [Arabidopsis thaliana]	416	998	1393	58	189	211	3e-16	62.88	78.79
Locus_65514_Transcript_1/1_Confidence_1.000	259	atha|NP_180201 | OG5_134909 | ER (ERECTA); transmembrane receptor protein kinase [Arabidopsis thaliana]	976	256	8	317	398	156	2e-11	44.58	56.63
Locus_8870_Transcript_1/1_Confidence_1.000	1813	atha|NP_180233 | OG5_146216 | AKT1 (ARABIDOPSIS K TRANSPORTER 1); cyclic nucleotide binding / inward rectifier potassium channel [Arabidopsis thaliana]	857	301	1806	38	534	1457	0	54.06	75.25
Locus_12650_Transcript_1/1_Confidence_1.000	1282	atha|NP_180251 | OG5_127649 | emb1187 (embryo defective 1187); kinase/ phosphotransferase, alcohol group as acceptor [Arabidopsis thaliana]	374	824	21	30	297	814	1e-102	60.07	75.75
Locus_25633_Transcript_1/1_Confidence_1.000	1636	atha|NP_180353 | OG5_141117 | AXS1 (UDP-D-apiose/UDP-D-xylose synthase 1); NAD or NADH binding / UDP-glucuronate decarboxylase [Arabidopsis thaliana]	389	1327	176	5	389	1507	0	70.91	84.16
Locus_20299_Transcript_1/1_Confidence_1.000	1353	atha|NP_180393 | OG5_131975 | ATCNGC15; calmodulin binding / cation channel/ cyclic nucleotide binding [Arabidopsis thaliana]	678	1352	612	431	675	760	1e-90	59.2	74.4
Locus_31472_Transcript_1/1_Confidence_1.000	1934	atha|NP_180423 | OG5_135350 | RAD51B; recombinase [Arabidopsis thaliana]	371	384	1436	1	342	667	3e-78	42.09	62.43
Locus_15488_Transcript_1/1_Confidence_1.000	2078	atha|NP_180427 | OG5_177699 | ATP binding / ATP-dependent helicase/ nucleic acid binding [Arabidopsis thaliana]	502	353	1414	143	490	469	8e-49	34.16	52.89
Locus_57182_Transcript_1/1_Confidence_1.000	522	atha|NP_180444 | OG5_170443 | unknown protein [Arabidopsis thaliana]	796	136	507	384	509	124	2e-06	26.15	52.31
Locus_4656_Transcript_1/1_Confidence_1.000	2421	atha|NP_180469 | OG5_127224 | ATRBL1 (Arabidopsis thaliana Rhomboid-like 1)	389	1624	710	55	360	785	9e-94	60.39	77.6
Locus_295_Transcript_1/1_Confidence_1.000	1994	atha|NP_180594 | OG5_128732 | endo/excinuclease amino terminal domain-containing protein [Arabidopsis thaliana]	368	203	640	29	174	492	3e-53	57.53	73.97
Locus_2017_Transcript_1/1_Confidence_1.000	699	atha|NP_180663 | OG5_143100 | plastocyanin-like domain-containing protein [Arabidopsis thaliana]	200	259	2	10	92	143	3e-09	39.53	53.49
Locus_38152_Transcript_1/1_Confidence_1.000	1070	atha|NP_180663 | OG5_143100 | plastocyanin-like domain-containing protein [Arabidopsis thaliana]	200	959	564	13	139	234	5e-21	39.39	54.55
Locus_51499_Transcript_1/1_Confidence_1.000	322	atha|NP_180663 | OG5_143100 | plastocyanin-like domain-containing protein [Arabidopsis thaliana]	200	5	304	42	139	199	5e-18	38	58
Locus_16564_Transcript_1/1_Confidence_1.000	1461	atha|NP_180711 | OG5_170447 | EMB2289 (EMBRYO DEFECTIVE 2289); P-P-bond-hydrolysis-driven protein transmembrane transporter [Arabidopsis thaliana]	575	7	891	282	575	918	9e-115	59.93	80.81
Locus_8681_Transcript_1/1_Confidence_1.000	1138	atha|NP_180725 | OG5_155916 | unknown protein [Arabidopsis thaliana]	263	121	759	37	251	389	8e-42	39.35	60.19
Locus_11690_Transcript_1/1_Confidence_1.000	840	atha|NP_180761 | OG5_137221 | endonuclease/exonuclease/phosphatase family protein [Arabidopsis thaliana]	594	838	2	128	370	293	1e-27	36.92	46.24
Locus_24404_Transcript_1/1_Confidence_1.000	1279	atha|NP_180803 | OG5_177466 | KAO2 (ENT-KAURENOIC ACID HYDROXYLASE 2); ent-kaurenoate oxidase/ oxygen binding [Arabidopsis thaliana]	489	2	958	164	486	785	8e-97	44.89	64.4
Locus_57092_Transcript_1/1_Confidence_1.000	1605	atha|NP_180810 | OG5_211865 | MAPKKK17; ATP binding / kinase/ protein kinase/ protein serine/threonine kinase [Arabidopsis thaliana]	372	3	311	168	268	191	1e-13	38.83	58.25
Locus_5019_Transcript_1/1_Confidence_1.000	520	atha|NP_180825 | OG5_130149 | AtRLP22 (Receptor Like Protein 22); kinase/ protein binding [Arabidopsis thaliana]	589	2	340	415	527	168	4e-12	41.88	56.41
Locus_18762_Transcript_1/1_Confidence_1.000	824	atha|NP_180832 | OG5_127160 | 26S proteasome regulatory subunit, putative [Arabidopsis thaliana]	1004	155	48	72	107	105	5e-07	58.33	69.44
Locus_337_Transcript_1/1_Confidence_1.000	1977	atha|NP_180842 | OG5_127743 | PHT5; inorganic phosphate transmembrane transporter/ phosphate transmembrane transporter [Arabidopsis thaliana]	542	845	1975	5	385	1207	5e-156	67.19	78.74
Locus_38425_Transcript_1/1_Confidence_1.000	2302	atha|NP_180875 | OG5_127136 | leucine-rich repeat transmembrane protein kinase, putative [Arabidopsis thaliana]	1124	367	2019	36	632	639	2e-68	34.66	48.26
Locus_29290_Transcript_1/2_Confidence_1.000	462	atha|NP_180938 | OG5_129029 | MBAC1; L-histidine transmembrane transporter/ L-lysine transmembrane transporter/ L-ornithine transmembrane transporter/ arginine transmembrane transporter/ binding [Arabidopsis thaliana]	311	460	326	55	99	153	7e-13	57.78	84.44
Locus_29290_Transcript_2/2_Confidence_1.000	395	atha|NP_180938 | OG5_129029 | MBAC1; L-histidine transmembrane transporter/ L-lysine transmembrane transporter/ L-ornithine transmembrane transporter/ arginine transmembrane transporter/ binding [Arabidopsis thaliana]	311	393	145	55	138	209	1e-18	49.43	67.82
Locus_32930_Transcript_1/1_Confidence_1.000	584	atha|NP_180938 | OG5_129029 | MBAC1; L-histidine transmembrane transporter/ L-lysine transmembrane transporter/ L-ornithine transmembrane transporter/ arginine transmembrane transporter/ binding [Arabidopsis thaliana]	311	422	583	16	69	166	3e-12	51.85	75.93
Locus_16410_Transcript_1/1_Confidence_1.000	973	atha|NP_180956 | OG5_133734 | MEE18 (maternal effect embryo arrest 18) [Arabidopsis thaliana]	445	678	971	45	142	407	3e-43	80.61	88.78
Locus_7067_Transcript_1/1_Confidence_1.000	1044	atha|NP_180994 | OG5_129907 | UREG (UREASE ACCESSORY PROTEIN G); ATP binding / metal ion binding / nickel ion binding / nucleotide binding [Arabidopsis thaliana]	275	1	510	106	275	786	5e-101	87.65	93.53
Locus_18986_Transcript_1/1_Confidence_1.000	441	atha|NP_181047 | OG5_127359 | UTP--glucose-1-phosphate uridylyltransferase family protein [Arabidopsis thaliana]	502	1	435	227	371	569	7e-69	70.34	81.38
Locus_21388_Transcript_1/1_Confidence_1.000	852	atha|NP_181133 | OG5_126600 | CPK25; ATP binding / calmodulin-dependent protein kinase/ kinase/ protein kinase/ protein serine/threonine kinase [Arabidopsis thaliana]	520	3	401	261	391	320	2e-31	45.86	63.91
Locus_16516_Transcript_1/1_Confidence_1.000	2605	atha|NP_181190 | OG5_140292 | DML1 (DEMETER-LIKE 1); DNA N-glycosylase/ DNA-(apurinic or apyrimidinic site) lyase/ protein binding [Arabidopsis thaliana]	1393	23	2473	504	1383	1510	0	41.41	55.8
Locus_22170_Transcript_1/1_Confidence_1.000	335	atha|NP_181290 | OG5_126621 | short-chain dehydrogenase/reductase (SDR) family protein [Arabidopsis thaliana]	321	334	11	102	207	271	2e-27	50.93	67.59
Locus_22869_Transcript_1/1_Confidence_1.000	2220	atha|NP_181299 | OG5_177724 | AS1 (ASYMMETRIC LEAVES 1); DNA binding / protein homodimerization/ transcription factor [Arabidopsis thaliana]	367	1969	1679	1	97	384	2e-38	75.26	84.54
Locus_9571_Transcript_1/1_Confidence_1.000	856	atha|NP_181336 | OG5_133364 | chaperone protein dnaJ-related [Arabidopsis thaliana]	419	6	377	294	419	287	3e-27	46.03	65.87
Locus_23758_Transcript_1/1_Confidence_1.000	270	atha|NP_181336 | OG5_133364 | chaperone protein dnaJ-related [Arabidopsis thaliana]	419	4	270	204	292	263	2e-26	52.81	69.66
Locus_8338_Transcript_1/1_Confidence_1.000	1359	atha|NP_181359 | no_group | oxidoreductase, 2OG-Fe(II) oxygenase family protein [Arabidopsis thaliana]	353	1044	112	35	339	466	3e-51	37.5	56.73
Locus_2798_Transcript_1/1_Confidence_1.000	790	atha|NP_181480 | OG5_126596 | PGP6 (P-GLYCOPROTEIN 6); ATPase, coupled to transmembrane movement of substances [Arabidopsis thaliana]	1407	536	790	2	92	155	8e-10	63.74	72.53
Locus_1551_Transcript_1/1_Confidence_1.000	673	atha|NP_181507 | OG5_127109 | CYT1 (CYTOKINESIS DEFECTIVE 1); mannose-1-phosphate guanylyltransferase/ nucleotidyltransferase [Arabidopsis thaliana]	361	671	273	229	361	626	1e-77	84.96	93.98
Locus_616_Transcript_1/1_Confidence_1.000	566	atha|NP_181530 | OG5_127051 | 60S acidic ribosomal protein P0 (RPP0A) [Arabidopsis thaliana]	317	1	564	77	264	850	1e-112	87.23	94.15
Locus_3921_Transcript_1/1_Confidence_1.000	780	atha|NP_181530 | OG5_127051 | 60S acidic ribosomal protein P0 (RPP0A) [Arabidopsis thaliana]	317	779	693	250	278	127	2e-06	82.76	93.1
Locus_4547_Transcript_1/1_Confidence_1.000	537	atha|NP_181546 | OG5_177735 | GEA6 (LATE EMBRYOGENESIS ABUNDANT 6) [Arabidopsis thaliana]	92	2	157	39	90	154	1e-11	59.62	76.92
Locus_7231_Transcript_1/1_Confidence_1.000	1111	atha|NP_181546 | OG5_177735 | GEA6 (LATE EMBRYOGENESIS ABUNDANT 6) [Arabidopsis thaliana]	92	282	464	26	86	174	2e-13	60.66	77.05
Locus_26363_Transcript_1/1_Confidence_1.000	555	atha|NP_181554 | OG5_175858 | GDSL-motif lipase/hydrolase family protein [Arabidopsis thaliana]	361	553	278	260	349	210	4e-18	42.39	61.96
Locus_20610_Transcript_1/1_Confidence_1.000	1607	atha|NP_181559 | OG5_127547 | ATFER4 (ferritin 4); binding / ferric iron binding / oxidoreductase/ transition metal ion binding [Arabidopsis thaliana]	259	60	620	67	256	510	7e-58	53.12	72.4
Locus_3626_Transcript_1/1_Confidence_1.000	475	atha|NP_181620 | no_group | ATCYSA (CYSTATIN A); cysteine-type endopeptidase inhibitor [Arabidopsis thaliana]	125	112	468	6	125	250	2e-25	37.5	61.67
Locus_18731_Transcript_1/1_Confidence_1.000	1231	atha|NP_181620 | no_group | ATCYSA (CYSTATIN A); cysteine-type endopeptidase inhibitor [Arabidopsis thaliana]	125	663	953	30	121	138	3e-08	31.96	52.58
Locus_31626_Transcript_1/1_Confidence_1.000	1257	atha|NP_181633 | OG5_170208 | heat shock protein binding [Arabidopsis thaliana]	184	948	385	1	181	278	8e-27	36.95	52.22
Locus_25151_Transcript_1/1_Confidence_1.000	312	atha|NP_181773 | OG5_139914 | lipase class 3 family protein [Arabidopsis thaliana]	546	6	266	339	424	201	3e-17	52.87	72.41
Locus_11593_Transcript_1/1_Confidence_1.000	733	atha|NP_181884 | OG5_150295 | immunophilin / FKBP-type peptidyl-prolyl cis-trans isomerase family protein [Arabidopsis thaliana]	223	323	3	52	157	345	3e-37	64.49	77.57
Locus_45844_Transcript_1/1_Confidence_1.000	639	atha|NP_182094 | OG5_129094 | sterile alpha motif (SAM) domain-containing protein [Arabidopsis thaliana]	723	352	624	175	276	176	8e-13	39.22	60.78
Locus_27002_Transcript_1/1_Confidence_1.000	274	atha|NP_182179 | OG5_162844 | transducin family protein / WD-40 repeat family protein [Arabidopsis thaliana]	2471	274	5	306	395	141	4e-09	34.44	48.89
Locus_33289_Transcript_1/1_Confidence_1.000	1306	atha|NP_182216 | OG5_190136 | pectinacetylesterase, putative [Arabidopsis thaliana]	416	833	9	55	319	702	3e-85	46.18	63.64
Locus_42004_Transcript_1/1_Confidence_1.000	1513	atha|NP_182216 | OG5_190136 | pectinacetylesterase, putative [Arabidopsis thaliana]	416	57	1157	55	410	801	5e-99	44.29	61.41
Locus_19960_Transcript_1/1_Confidence_1.000	255	atha|NP_182218 | OG5_126554 | CYP709B2; electron carrier/ heme binding / iron ion binding / monooxygenase/ oxygen binding [Arabidopsis thaliana]	572	8	208	93	155	119	1e-06	38.81	53.73
Locus_19523_Transcript_1/1_Confidence_1.000	2510	atha|NP_182265 | OG5_177762 | CKI1 (CYTOKININ-INDEPENDENT 1); protein histidine kinase/ two-component response regulator [Arabidopsis thaliana]	1122	2435	507	569	1119	474	5e-47	29.47	44.73
Locus_28232_Transcript_1/1_Confidence_1.000	647	atha|NP_182265 | OG5_177762 | CKI1 (CYTOKININ-INDEPENDENT 1); protein histidine kinase/ two-component response regulator [Arabidopsis thaliana]	1122	283	642	14	135	191	2e-14	36.59	56.1
Locus_13893_Transcript_1/1_Confidence_1.000	697	atha|NP_182287 | OG5_127492 | UXS4 (UDP-XYLOSE SYNTHASE 4); UDP-glucuronate decarboxylase/ catalytic [Arabidopsis thaliana]	443	697	500	369	434	287	8e-28	80.3	90.91
Locus_333_Transcript_1/1_Confidence_1.000	1316	atha|NP_182327 | OG5_159771 | unknown protein [Arabidopsis thaliana]	2440	2	1267	1962	2365	993	1e-117	47.31	63.7
Locus_3253_Transcript_1/1_Confidence_1.000	3411	atha|NP_186767 | OG5_129400 | AtSS2 (starch synthase 2); transferase, transferring glycosyl groups [Arabidopsis thaliana]	792	182	2362	44	792	2229	0	57.39	69.8
Locus_38538_Transcript_1/1_Confidence_1.000	520	atha|NP_186795 | OG5_150036 | MBD9; DNA binding / methyl-CpG binding [Arabidopsis thaliana]	2176	353	6	884	995	263	4e-24	49.14	65.52
Locus_33283_Transcript_1/1_Confidence_1.000	1399	atha|NP_186881 | OG5_127349 | RNA binding / tRNA (guanine-N2-)-methyltransferase [Arabidopsis thaliana]	589	978	4	8	334	1097	1e-141	62.65	78.01
Locus_37753_Transcript_1/1_Confidence_1.000	967	atha|NP_186892 | OG5_150300 | unknown protein [Arabidopsis thaliana]	219	203	709	41	213	228	3e-20	40.8	55.75
Locus_44108_Transcript_1/1_Confidence_1.000	1622	atha|NP_186892 | OG5_150300 | unknown protein [Arabidopsis thaliana]	219	1074	595	46	209	310	2e-30	43.64	57.58
Locus_41229_Transcript_1/1_Confidence_1.000	1404	atha|NP_186914 | OG5_177769 | pentatricopeptide (PPR) repeat-containing protein [Arabidopsis thaliana]	1077	246	1262	167	496	181	3e-12	23.56	41.1
Locus_14930_Transcript_1/1_Confidence_1.000	1080	atha|NP_186922 | OG5_137505 | TRXF1 (THIOREDOXIN F-TYPE 1); enzyme activator [Arabidopsis thaliana]	178	555	932	51	175	449	1e-51	65.87	79.37
Locus_4840_Transcript_1/1_Confidence_1.000	1848	atha|NP_186955 | OG5_129836 | CSLD3 (CELLULOSE SYNTHASE-LIKE D3); cellulose synthase/ transferase, transferring glycosyl groups [Arabidopsis thaliana]	1145	1848	958	843	1139	1391	2e-176	84.85	94.28
Locus_867_Transcript_1/1_Confidence_1.000	1269	atha|NP_186999 | OG5_129494 | PEX19-1 (peroxin 19-1) [Arabidopsis thaliana]	248	153	620	70	228	435	3e-48	50.94	74.21
Locus_10902_Transcript_1/1_Confidence_1.000	860	atha|NP_187021 | OG5_128725 | RIF10 (resistant to inhibition with FSM 10); 3-5-exoribonuclease/ RNA binding / nucleic acid binding / polyribonucleotide nucleotidyltransferase [Arabidopsis thaliana]	922	447	812	89	210	503	2e-55	73.77	85.25
Locus_16090_Transcript_1/1_Confidence_1.000	1049	atha|NP_187112 | OG5_163423 | FLK (flowering locus KH domain); RNA binding / nucleic acid binding [Arabidopsis thaliana]	577	858	1040	163	224	137	3e-07	46.77	66.13
Locus_6498_Transcript_1/1_Confidence_1.000	3182	atha|NP_187122 | OG5_126566 | ankyrin repeat family protein [Arabidopsis thaliana]	456	472	1830	4	448	1173	2e-147	53.29	70.83
Locus_14779_Transcript_1/1_Confidence_1.000	663	atha|NP_187133 | OG5_127405 | pseudouridine synthase [Arabidopsis thaliana]	715	6	659	191	399	552	1e-63	58.18	76.36
Locus_38324_Transcript_1/1_Confidence_1.000	276	atha|NP_187133 | OG5_127405 | pseudouridine synthase [Arabidopsis thaliana]	715	108	275	40	95	185	4e-15	57.14	76.79
Locus_39730_Transcript_1/1_Confidence_1.000	2930	atha|NP_187176 | OG5_177782 | zinc finger (C3HC4-type RING finger) family protein [Arabidopsis thaliana]	278	2930	2457	72	232	239	1e-19	38.41	53.66
Locus_14147_Transcript_1/1_Confidence_1.000	647	atha|NP_187219 | OG5_177787 | EMB2016 (embryo defective 2016) [Arabidopsis thaliana]	2138	646	266	31	155	287	8e-27	44.88	69.29
Locus_20954_Transcript_1/1_Confidence_1.000	767	atha|NP_187219 | OG5_177787 | EMB2016 (embryo defective 2016) [Arabidopsis thaliana]	2138	313	5	8	112	185	1e-13	42.59	61.11
Locus_62739_Transcript_1/1_Confidence_1.000	229	atha|NP_187219 | OG5_177787 | EMB2016 (embryo defective 2016) [Arabidopsis thaliana]	2138	2	142	44	90	130	6e-08	46.81	78.72
Locus_18716_Transcript_1/1_Confidence_1.000	1617	atha|NP_187225 | OG5_126644 | RECQI1 (Arabidopsis RecQ helicase l1); ATP binding / ATP-dependent helicase/ helicase/ nucleic acid binding [Arabidopsis thaliana]	606	228	1592	158	603	1490	0	62.86	78.24
Locus_2859_Transcript_1/1_Confidence_1.000	1045	atha|NP_187239 | OG5_130214 | RCI2A (RARE-COLD-INDUCIBLE 2A) [Arabidopsis thaliana]	54	851	696	1	52	211	3e-19	75	94.23
Locus_13375_Transcript_1/1_Confidence_1.000	856	atha|NP_187239 | OG5_130214 | RCI2A (RARE-COLD-INDUCIBLE 2A) [Arabidopsis thaliana]	54	382	543	1	54	216	3e-20	77.78	90.74
Locus_4370_Transcript_1/1_Confidence_1.000	350	atha|NP_187240 | OG5_130214 | RCI2B (RARE-COLD-INDUCIBLE 2B) [Arabidopsis thaliana]	54	81	1	2	28	111	2e-06	70.37	100
Locus_7687_Transcript_1/1_Confidence_1.000	1347	atha|NP_187245 | OG5_126850 | unknown protein [Arabidopsis thaliana]	422	150	1	3	52	159	8e-10	58	76
Locus_26734_Transcript_1/1_Confidence_1.000	967	atha|NP_187245 | OG5_126850 | unknown protein [Arabidopsis thaliana]	422	966	550	265	402	264	5e-24	48.25	63.64
Locus_71177_Transcript_1/1_Confidence_1.000	256	atha|NP_187246 | OG5_133561 | germin-like protein, putative [Arabidopsis thaliana]	229	22	246	146	224	153	6e-12	43.75	60
Locus_37921_Transcript_1/1_Confidence_1.000	405	atha|NP_187266 | OG5_170498 | unknown protein [Arabidopsis thaliana]	594	3	404	213	335	242	2e-22	40	54.81
Locus_39650_Transcript_1/1_Confidence_1.000	531	atha|NP_187266 | OG5_170498 | unknown protein [Arabidopsis thaliana]	594	2	529	411	588	434	3e-48	47.22	67.78
Locus_31715_Transcript_1/1_Confidence_1.000	898	atha|NP_187280 | OG5_129428 | unknown protein [Arabidopsis thaliana]	1697	360	1	481	600	495	3e-53	70	88.33
Locus_41075_Transcript_1/1_Confidence_1.000	481	atha|NP_187348 | OG5_176994 | pentatricopeptide (PPR) repeat-containing protein [Arabidopsis thaliana]	871	36	476	49	230	152	4e-10	23.08	40.11
Locus_9708_Transcript_1/2_Confidence_1.000	823	atha|NP_187362 | OG5_177793 | emb1974 (embryo defective 1974) [Arabidopsis thaliana]	774	199	2	278	343	211	8e-17	56.06	72.73
Locus_1825_Transcript_1/1_Confidence_1.000	577	atha|NP_187396 | OG5_177795 | lipase class 3 family protein [Arabidopsis thaliana]	1003	562	11	434	613	508	3e-57	53.26	67.93
Locus_3904_Transcript_1/1_Confidence_1.000	1759	atha|NP_187405 | OG5_147166 | AGD11 (ARF-GAP domain 11); calcium ion binding [Arabidopsis thaliana]	153	1113	664	4	143	300	1e-29	44	64.67
Locus_33723_Transcript_1/1_Confidence_1.000	1593	atha|NP_187447 | OG5_177752 | unknown protein [Arabidopsis thaliana]	579	2	1012	241	577	930	8e-116	54.9	72.11
Locus_881_Transcript_1/1_Confidence_1.000	658	atha|NP_187506 | OG5_141664 | LHCB4.2 (light harvesting complex PSII); chlorophyll binding [Arabidopsis thaliana]	287	653	102	103	285	759	1e-98	81.52	89.67
Locus_66581_Transcript_1/1_Confidence_1.000	457	atha|NP_187574 | OG5_127050 | 60S ribosomal protein L4/L1 (RPL4A) [Arabidopsis thaliana]	406	455	3	136	290	453	1e-52	57.05	74.36
Locus_11572_Transcript_1/1_Confidence_1.000	266	atha|NP_187577 | OG5_129017 | MCM8; ATP binding / DNA binding / DNA-dependent ATPase/ nucleoside-triphosphatase/ nucleotide binding [Arabidopsis thaliana]	777	264	1	653	740	347	4e-37	72.73	88.64
Locus_13036_Transcript_1/1_Confidence_1.000	271	atha|NP_187601 | OG5_127321 | ATRABE1E (ARABIDOPSIS RAB GTPASE HOMOLOG E1E); GTP binding [Arabidopsis thaliana]	218	155	226	11	34	119	5e-07	100	100
Locus_22298_Transcript_1/1_Confidence_1.000	899	atha|NP_187617 | OG5_164515 | immunophilin, putative / FKBP-type peptidyl-prolyl cis-trans isomerase, putative [Arabidopsis thaliana]	230	572	72	63	230	665	4e-84	75	88.1
Locus_51619_Transcript_1/1_Confidence_1.000	302	atha|NP_187626 | OG5_142797 | PAP16 (PURPLE ACID PHOSPHATASE 16); acid phosphatase/ protein serine/threonine phosphatase [Arabidopsis thaliana]	367	291	1	130	233	214	1e-19	49.04	59.62
Locus_70805_Transcript_1/1_Confidence_1.000	293	atha|NP_187629 | OG5_126585 | kinesin motor protein-related [Arabidopsis thaliana]	1348	4	291	21	113	295	1e-29	54.17	75
Locus_7070_Transcript_1/1_Confidence_1.000	1737	atha|NP_187634 | OG5_143063 | LYC (LYCOPENE CYCLASE); lycopene beta cyclase [Arabidopsis thaliana]	501	751	2	46	295	863	3e-106	68	82
Locus_62159_Transcript_1/1_Confidence_1.000	599	atha|NP_187643 | OG5_155224 | transferase, transferring glycosyl groups [Arabidopsis thaliana]	494	240	599	93	209	239	2e-21	37.7	63.93
Locus_19932_Transcript_1/1_Confidence_1.000	1080	atha|NP_187666 | OG5_128154 | phosphatase/ protein tyrosine phosphatase [Arabidopsis thaliana]	840	714	1	22	246	399	2e-40	40.42	55.83
Locus_3686_Transcript_1/1_Confidence_1.000	944	atha|NP_187709 | OG5_153310 | unknown protein [Arabidopsis thaliana]	563	584	63	133	301	331	1e-32	43.1	59.2
Locus_18521_Transcript_1/1_Confidence_1.000	677	atha|NP_187715 | OG5_130163 | glycosyl hydrolase family 85 protein [Arabidopsis thaliana]	701	443	3	22	168	536	2e-61	61.22	79.59
Locus_6369_Transcript_1/1_Confidence_1.000	273	atha|NP_187780 | OG5_136596 | unknown protein [Arabidopsis thaliana]	194	24	272	3	85	140	4e-10	32.53	62.65
Locus_10231_Transcript_1/1_Confidence_1.000	484	atha|NP_187780 | OG5_136596 | unknown protein [Arabidopsis thaliana]	194	3	383	61	193	185	2e-15	34.33	59.7
Locus_23829_Transcript_1/1_Confidence_1.000	1088	atha|NP_187780 | OG5_136596 | unknown protein [Arabidopsis thaliana]	194	880	320	2	193	287	4e-28	36.92	60
Locus_8942_Transcript_1/1_Confidence_1.000	1321	atha|NP_187837 | OG5_126671 | tetrahydrofolate dehydrogenase/cyclohydrolase, putative [Arabidopsis thaliana]	299	26	916	1	297	1141	9e-153	72.73	83.16
Locus_20108_Transcript_1/1_Confidence_1.000	309	atha|NP_187874 | OG5_170517 | HUA1 (ENHANCER OF AG-4 1); RNA binding [Arabidopsis thaliana]	524	252	148	333	367	169	5e-13	82.86	91.43
Locus_11973_Transcript_1/1_Confidence_1.000	543	atha|NP_187886 | OG5_130175 | SDRB (SHORT-CHAIN DEHYDROGENASE-REDUCTASE B); binding / catalytic/ oxidoreductase [Arabidopsis thaliana]	298	363	542	3	62	188	2e-15	58.33	80
Locus_412_Transcript_1/1_Confidence_1.000	2706	atha|NP_187912 | OG5_149975 | unknown protein [Arabidopsis thaliana]	634	2	1546	92	552	931	5e-111	44.85	56.11
Locus_47374_Transcript_1/1_Confidence_1.000	2342	atha|NP_187928 | OG5_175543 | ABC transporter family protein [Arabidopsis thaliana]	685	2226	1240	356	678	845	4e-99	48.02	70.21
Locus_2133_Transcript_1/1_Confidence_1.000	2094	atha|NP_187941 | OG5_129781 | binding [Arabidopsis thaliana]	1781	1	2094	1006	1685	1090	4e-128	37.29	57.2
Locus_13447_Transcript_1/1_Confidence_1.000	260	atha|NP_187941 | OG5_129781 | binding [Arabidopsis thaliana]	1781	6	260	1685	1769	287	1e-28	58.82	77.65
Locus_16310_Transcript_1/1_Confidence_1.000	2377	atha|NP_187941 | OG5_129781 | binding [Arabidopsis thaliana]	1781	1898	1095	1519	1781	741	2e-80	51.12	71.27
Locus_22546_Transcript_1/1_Confidence_1.000	649	atha|NP_187941 | OG5_129781 | binding [Arabidopsis thaliana]	1781	639	4	1089	1296	253	2e-22	35.85	52.83
Locus_15845_Transcript_1/1_Confidence_1.000	2066	atha|NP_188056 | OG5_126750 | diaminopimelate decarboxylase, putative / DAP carboxylase, putative [Arabidopsis thaliana]	484	453	1694	70	484	1663	0	71.7	86.57
Locus_26071_Transcript_1/1_Confidence_1.000	309	atha|NP_188081 | OG5_126554 | CYP72A9; electron carrier/ heme binding / iron ion binding / monooxygenase/ oxygen binding [Arabidopsis thaliana]	508	308	48	422	508	268	1e-26	55.17	70.11
Locus_60218_Transcript_1/1_Confidence_1.000	478	atha|NP_188081 | OG5_126554 | CYP72A9; electron carrier/ heme binding / iron ion binding / monooxygenase/ oxygen binding [Arabidopsis thaliana]	508	477	217	422	508	272	2e-26	55.17	68.97
Locus_4200_Transcript_1/1_Confidence_1.000	4454	atha|NP_188130 | OG5_164523 | AAA-type ATPase family protein [Arabidopsis thaliana]	1954	447	3893	490	1568	1872	0	39.49	55.19
Locus_12844_Transcript_1/1_Confidence_1.000	889	atha|NP_188134 | OG5_136221 | unknown protein [Arabidopsis thaliana]	562	884	225	349	559	651	5e-78	58.82	74.21
Locus_4706_Transcript_1/1_Confidence_1.000	458	atha|NP_188194 | OG5_131416 | PLDALPHA1 (PHOSPHOLIPASE D ALPHA 1); phospholipase D [Arabidopsis thaliana]	810	1	432	667	810	491	5e-56	62.76	76.55
Locus_11642_Transcript_1/1_Confidence_1.000	3354	atha|NP_188247 | OG5_126816 | TRZ4 (TRNASE Z 4); 3-tRNA processing endoribonuclease/ catalytic [Arabidopsis thaliana]	942	2129	243	291	894	1567	0	50.31	63.01
Locus_7487_Transcript_1/1_Confidence_1.000	2308	atha|NP_188294 | OG5_190201 | ATL2; protein binding / zinc ion binding [Arabidopsis thaliana]	304	1379	1155	95	166	218	4e-17	56	66.67
Locus_9665_Transcript_1/1_Confidence_1.000	379	atha|NP_188328 | OG5_177816 | unknown protein [Arabidopsis thaliana]	668	1	378	510	637	192	1e-15	37.12	53.03
Locus_5008_Transcript_1/1_Confidence_1.000	1428	atha|NP_188394 | OG5_164527 | binding [Arabidopsis thaliana]	236	1022	381	10	230	414	9e-45	41.18	62.44
Locus_45479_Transcript_1/1_Confidence_1.000	328	atha|NP_188424 | OG5_150132 | atToc64-III (Arabidopsis thaliana translocon at the outer membrane of chloroplasts 64-III); binding / carbon-nitrogen ligase, with glutamine as amido-N-donor	589	273	16	157	241	296	3e-30	59.3	80.23
Locus_1764_Transcript_1/1_Confidence_1.000	1104	atha|NP_188476 | OG5_155909 | unknown protein [Arabidopsis thaliana]	133	3	272	44	131	228	9e-21	48.35	64.84
Locus_37878_Transcript_1/1_Confidence_1.000	542	atha|NP_188478 | OG5_212401 | aspartyl protease family protein [Arabidopsis thaliana]	500	541	2	112	279	436	5e-49	48.33	63.89
Locus_37748_Transcript_1/1_Confidence_1.000	593	atha|NP_188492 | OG5_164530 | zinc finger (DHHC type) family protein [Arabidopsis thaliana]	345	197	24	17	72	154	2e-10	55.17	60.34
Locus_22434_Transcript_1/1_Confidence_1.000	1148	atha|NP_188493 | OG5_127417 | uracil DNA glycosylase family protein [Arabidopsis thaliana]	330	1077	277	61	330	888	4e-115	61.85	74.44
Locus_25106_Transcript_1/1_Confidence_1.000	1461	atha|NP_188575 | OG5_129784 | pseudouridine synthase family protein [Arabidopsis thaliana]	477	231	1442	1	382	722	9e-87	41.46	57.56
Locus_12392_Transcript_1/1_Confidence_1.000	1093	atha|NP_188596 | OG5_131698 | glycosyl hydrolase family 3 protein [Arabidopsis thaliana]	781	259	1092	27	301	915	8e-114	58.01	75.09
Locus_44175_Transcript_1/1_Confidence_1.000	1233	atha|NP_188596 | OG5_131698 | glycosyl hydrolase family 3 protein [Arabidopsis thaliana]	781	951	4	37	342	1009	6e-127	58.68	73.82
Locus_4444_Transcript_1/1_Confidence_1.000	435	atha|NP_188603 | OG5_127475 | pathogenesis-related protein, putative [Arabidopsis thaliana]	161	1	177	102	161	170	1e-13	50	65
Locus_17576_Transcript_1/1_Confidence_1.000	624	atha|NP_188640 | OG5_127998 | ATTCP-1; ATP binding / protein binding / unfolded protein binding [Arabidopsis thaliana]	545	186	623	3	148	706	9e-88	91.1	96.58
Locus_14364_Transcript_1/1_Confidence_1.000	843	atha|NP_188674 | OG5_127043 | endoribonuclease L-PSP family protein [Arabidopsis thaliana]	187	328	2	64	172	485	6e-58	82.57	91.74
Locus_23258_Transcript_1/1_Confidence_1.000	835	atha|NP_188691 | OG5_128999 | DDL (DAWDLE) [Arabidopsis thaliana]	314	1	381	187	313	562	8e-68	77.95	88.19
Locus_25676_Transcript_1/1_Confidence_1.000	875	atha|NP_188701 | OG5_127958 | mRNA capping enzyme family protein [Arabidopsis thaliana]	370	656	3	32	250	863	4e-112	72.15	82.65
Locus_6607_Transcript_1/1_Confidence_1.000	843	atha|NP_188819 | OG5_146226 | ATXR2 (HISTONE-LYSINE N-METHYLTRANSFERASE ATXR2); zinc ion binding [Arabidopsis thaliana]	473	417	710	15	110	237	2e-20	45.92	68.37
Locus_673_Transcript_1/1_Confidence_1.000	334	atha|NP_188875 | OG5_130283 | AOX1B; alternative oxidase [Arabidopsis thaliana]	325	2	334	144	254	402	2e-46	83.78	92.79
Locus_10888_Transcript_1/1_Confidence_1.000	1685	atha|NP_188876 | OG5_130283 | AOX1A (ALTERNATIVE OXIDASE 1A); alternative oxidase [Arabidopsis thaliana]	354	30	590	167	353	789	2e-97	74.87	87.17
Locus_6874_Transcript_1/1_Confidence_1.000	1193	atha|NP_188888 | OG5_159281 | late embryogenesis abundant protein, putative / LEA protein, putative [Arabidopsis thaliana]	262	329	679	136	260	157	4e-10	41.27	51.59
Locus_8284_Transcript_1/1_Confidence_1.000	706	atha|NP_188923 | OG5_132960 | ELIP1 (EARLY LIGHT-INDUCABLE PROTEIN); chlorophyll binding [Arabidopsis thaliana]	195	588	253	84	195	295	3e-30	58.04	70.54
Locus_25886_Transcript_1/1_Confidence_1.000	1151	atha|NP_188923 | OG5_132960 | ELIP1 (EARLY LIGHT-INDUCABLE PROTEIN); chlorophyll binding [Arabidopsis thaliana]	195	560	78	38	195	369	1e-39	51.55	66.46
Locus_73209_Transcript_1/1_Confidence_1.000	301	atha|NP_188928 | OG5_126834 | DMC1 (DISRUPTION OF MEIOTIC CONTROL 1); ATP binding / DNA binding / DNA-dependent ATPase/ damaged DNA binding / nucleoside-triphosphatase/ nucleotide binding / protein binding [Arabidopsis thaliana]	344	301	2	195	294	489	2e-59	89	98
Locus_2381_Transcript_1/1_Confidence_1.000	1316	atha|NP_188985 | OG5_127625 | PHO1 (phosphate 1) [Arabidopsis thaliana]	782	1307	3	350	780	1060	4e-134	47.6	66.82
Locus_68136_Transcript_1/1_Confidence_1.000	631	atha|NP_188985 | OG5_127625 | PHO1 (phosphate 1) [Arabidopsis thaliana]	782	3	191	102	164	165	2e-11	49.21	73.02
Locus_49911_Transcript_1/1_Confidence_1.000	589	atha|NP_189009 | OG5_150194 | KINESIN-12B; microtubule motor/ plus-end-directed microtubule motor [Arabidopsis thaliana]	1313	237	587	836	947	314	9e-31	55.56	72.65
Locus_46367_Transcript_1/1_Confidence_1.000	683	atha|NP_189031 | OG5_127113 | TOPII (TOPOISOMERASE II); ATP binding / DNA binding / DNA topoisomerase (ATP-hydrolyzing)/ DNA topoisomerase/ DNA-dependent ATPase [Arabidopsis thaliana]	1473	161	6	8	66	211	5e-17	71.19	77.97
Locus_41020_Transcript_1/1_Confidence_1.000	577	atha|NP_189075 | OG5_150310 | MSH1 (MUTL PROTEIN HOMOLOG 1); ATP binding / catalytic/ damaged DNA binding / mismatched DNA binding / nuclease [Arabidopsis thaliana]	1118	31	576	76	257	657	1e-77	67.03	85.71
Locus_19889_Transcript_1/1_Confidence_1.000	2062	atha|NP_189108 | OG5_153318 | ABI3 (ABA INSENSITIVE 3); DNA binding / basal transcription repressor/ transcription activator/ transcription factor [Arabidopsis thaliana]	720	1836	2060	565	639	267	3e-22	62.67	76
Locus_32401_Transcript_1/1_Confidence_1.000	1424	atha|NP_189117 | OG5_136649 | catalytic [Arabidopsis thaliana]	159	954	496	7	159	655	3e-81	76.47	90.2
Locus_41345_Transcript_1/1_Confidence_1.000	598	atha|NP_189134 | OG5_130149 | AtRLP39 (Receptor Like Protein 39); protein binding [Arabidopsis thaliana]	884	178	597	144	285	159	1e-10	39.04	54.79
Locus_48988_Transcript_1/1_Confidence_1.000	309	atha|NP_189146 | OG5_129331 | CDC45 (cell division cycle 45) [Arabidopsis thaliana]	596	299	9	269	365	352	4e-38	67.01	79.38
Locus_7572_Transcript_1/1_Confidence_1.000	1191	atha|NP_189238 | OG5_177842 | RGS1 (REGULATOR OF G-PROTEIN SIGNALING 1); G-protein coupled receptor [Arabidopsis thaliana]	459	16	588	12	197	147	2e-08	25.52	43.75
Locus_28407_Transcript_1/1_Confidence_1.000	766	atha|NP_189241 | OG5_153320 | catalytic/ pyridoxal phosphate binding [Arabidopsis thaliana]	427	758	3	126	383	605	3e-73	51.55	69.77
Locus_53072_Transcript_1/1_Confidence_1.000	475	atha|NP_189244 | OG5_139406 | glycosyl hydrolase family 5 protein / cellulase family protein [Arabidopsis thaliana]	551	4	474	214	361	340	9e-36	44.94	61.39
Locus_17049_Transcript_1/1_Confidence_1.000	931	atha|NP_189311 | OG5_129138 | short-chain dehydrogenase/reductase (SDR) family protein [Arabidopsis thaliana]	300	329	916	37	229	340	6e-35	45.92	61.22
Locus_10142_Transcript_1/1_Confidence_1.000	1221	atha|NP_189427 | OG5_131390 | NQR (NADPH:QUINONE OXIDOREDUCTASE); FMN reductase [Arabidopsis thaliana]	196	441	992	11	194	586	3e-71	60.33	79.35
Locus_38168_Transcript_1/1_Confidence_1.000	386	atha|NP_189475 | OG5_126596 | ABC transporter family protein [Arabidopsis thaliana]	1240	385	2	399	526	516	5e-59	74.22	89.06
Locus_48216_Transcript_1/1_Confidence_1.000	473	atha|NP_189528 | OG5_126596 | ABCB19; ATPase, coupled to transmembrane movement of substances / auxin efflux transmembrane transporter [Arabidopsis thaliana]	1252	417	4	56	193	349	6e-36	44.93	65.22
Locus_621_Transcript_1/1_Confidence_1.000	635	atha|NP_189622 | OG5_159716 | MES11 (METHYL ESTERASE 11); hydrolase [Arabidopsis thaliana]	390	296	601	137	240	287	4e-28	50.96	62.5
Locus_41284_Transcript_1/1_Confidence_1.000	1285	atha|NP_189852 | OG5_129582 | nucleotide binding [Arabidopsis thaliana]	953	240	713	666	822	338	7e-32	44.3	63.92
Locus_18993_Transcript_1/1_Confidence_1.000	1876	atha|NP_189872 | OG5_170548 | zinc knuckle (CCHC-type) family protein [Arabidopsis thaliana]	372	821	1675	88	355	431	5e-45	36.45	48.49
Locus_16641_Transcript_1/1_Confidence_1.000	1315	atha|NP_189945 | OG5_190270 | zinc knuckle (CCHC-type) family protein [Arabidopsis thaliana]	551	48	662	136	340	427	2e-44	44.5	60.77
Locus_22279_Transcript_1/1_Confidence_1.000	1573	atha|NP_189947 | OG5_190271 | tubulin binding [Arabidopsis thaliana]	1207	1569	568	891	1204	498	1e-51	34.9	54.25
Locus_1491_Transcript_1/1_Confidence_1.000	323	atha|NP_190048 | OG5_127571 | protein tyrosine phosphatase [Arabidopsis thaliana]	239	123	323	58	122	218	2e-20	61.19	74.63
Locus_6238_Transcript_1/1_Confidence_1.000	3665	atha|NP_190090 | OG5_129435 | phosphatidate cytidylyltransferase family protein [Arabidopsis thaliana]	569	2846	1353	58	569	783	6e-89	38.37	55.04
Locus_41022_Transcript_1/1_Confidence_1.000	317	atha|NP_190119 | OG5_129991 | lectin protein kinase family protein [Arabidopsis thaliana]	682	315	1	143	251	154	7e-11	38.6	50
Locus_26545_Transcript_1/1_Confidence_1.000	1092	atha|NP_190160 | OG5_127847 | hydrolase family protein / HAD-superfamily protein [Arabidopsis thaliana]	376	1	816	107	368	668	1e-81	50	65.58
Locus_24056_Transcript_1/1_Confidence_1.000	558	atha|NP_190161 | OG5_174976 | unknown protein [Arabidopsis thaliana]	682	2	205	305	372	138	3e-08	44.12	63.24
Locus_43974_Transcript_1/1_Confidence_1.000	596	atha|NP_190212 | OG5_160058 | receptor protein kinase-related [Arabidopsis thaliana]	470	569	39	1	183	301	5e-30	38.54	53.12
Locus_3190_Transcript_1/1_Confidence_1.000	351	atha|NP_190253 | OG5_138334 | UDP-glucoronosyl/UDP-glucosyl transferase family protein [Arabidopsis thaliana]	452	321	1	255	355	246	1e-23	42.06	58.88
Locus_1575_Transcript_1/1_Confidence_1.000	363	atha|NP_190331 | OG5_160245 | LHCA4 (LIGHT-HARVESTING CHLOROPHYLL-PROTEIN COMPLEX I SUBUNIT A4); chlorophyll binding [Arabidopsis thaliana]	251	363	262	217	250	135	8e-09	70.59	79.41
Locus_39081_Transcript_1/1_Confidence_1.000	283	atha|NP_190342 | OG5_128518 | leucine-rich repeat transmembrane protein kinase, putative [Arabidopsis thaliana]	1011	2	193	188	252	122	8e-07	41.54	60
Locus_22827_Transcript_1/1_Confidence_1.000	2810	atha|NP_190345 | OG5_128655 | transcription regulator/ zinc ion binding [Arabidopsis thaliana]	408	2427	1273	3	370	764	2e-89	45.15	61.48
Locus_14511_Transcript_1/1_Confidence_1.000	911	atha|NP_190394 | OG5_133116 | EDD1 (EMBRYO-DEFECTIVE-DEVELOPMENT 1); glycine-tRNA ligase [Arabidopsis thaliana]	1067	577	2	38	229	847	2e-102	78.65	86.98
Locus_8762_Transcript_1/1_Confidence_1.000	1044	atha|NP_190479 | OG5_130786 | signal recognition particle 9 kDa protein, putative / SRP9, putative [Arabidopsis thaliana]	103	2	169	48	103	199	4e-17	66.07	78.57
Locus_16880_Transcript_1/1_Confidence_1.000	1863	atha|NP_190509 | OG5_190294 | transducin family protein / WD-40 repeat family protein [Arabidopsis thaliana]	892	2	1099	510	892	432	6e-43	30.85	48.01
Locus_4208_Transcript_1/1_Confidence_1.000	2213	atha|NP_190519 | OG5_130286 | RDR6 (RNA-DEPENDENT RNA POLYMERASE 6); RNA-directed RNA polymerase/ nucleic acid binding [Arabidopsis thaliana]	1196	2152	41	191	895	1548	0	44.67	63.07
Locus_15485_Transcript_1/1_Confidence_1.000	872	atha|NP_190538 | OG5_177877 | MYB84 (MYB DOMAIN PROTEIN 84); DNA binding / transcription factor [Arabidopsis thaliana]	310	397	38	1	120	553	2e-66	82.5	90.83
Locus_20960_Transcript_1/1_Confidence_1.000	1831	atha|NP_190538 | OG5_177877 | MYB84 (MYB DOMAIN PROTEIN 84); DNA binding / transcription factor [Arabidopsis thaliana]	310	622	263	1	120	545	1e-61	79.17	90.83
Locus_7346_Transcript_1/1_Confidence_1.000	1942	atha|NP_190587 | OG5_147145 | unknown protein [Arabidopsis thaliana]	588	1535	543	237	511	186	1e-12	26.51	42.17
Locus_18304_Transcript_1/1_Confidence_1.000	628	atha|NP_190592 | OG5_164542 | leucine-rich repeat transmembrane protein kinase, putative [Arabidopsis thaliana]	660	11	244	92	166	156	2e-10	47.44	67.95
Locus_6488_Transcript_1/1_Confidence_1.000	294	atha|NP_190651 | OG5_140478 | PSBO2 (PHOTOSYSTEM II SUBUNIT O-2); oxygen evolving/ poly(U) binding [Arabidopsis thaliana]	331	5	205	264	330	254	2e-25	71.64	82.09
Locus_25136_Transcript_1/1_Confidence_1.000	890	atha|NP_190674 | OG5_134033 | FG-GAP repeat-containing protein [Arabidopsis thaliana]	698	248	868	1	206	780	1e-95	65.7	85.51
Locus_4577_Transcript_1/1_Confidence_1.000	809	atha|NP_190692 | OG5_190300 | F3H (FLAVANONE 3-HYDROXYLASE); naringenin 3-dioxygenase [Arabidopsis thaliana]	358	283	741	18	167	305	4e-30	41.18	58.82
Locus_16500_Transcript_1/1_Confidence_1.000	458	atha|NP_190692 | OG5_190300 | F3H (FLAVANONE 3-HYDROXYLASE); naringenin 3-dioxygenase [Arabidopsis thaliana]	358	438	139	194	294	340	1e-36	59.41	78.22
Locus_7956_Transcript_1/1_Confidence_1.000	282	atha|NP_190803 | OG5_146468 | D111/G-patch domain-containing protein [Arabidopsis thaliana]	180	192	281	74	103	110	6e-06	66.67	83.33
Locus_40341_Transcript_1/1_Confidence_1.000	335	atha|NP_190807 | OG5_126665 | tatD-related deoxyribonuclease family protein [Arabidopsis thaliana]	320	133	333	1	67	265	1e-26	71.64	85.07
Locus_63732_Transcript_1/1_Confidence_1.000	305	atha|NP_190852 | OG5_130580 | BGAL2 (beta-galactosidase 2); beta-galactosidase/ catalytic/ cation binding [Arabidopsis thaliana]	727	100	303	23	90	282	4e-28	72.06	82.35
Locus_8307_Transcript_1/1_Confidence_1.000	1234	atha|NP_190856 | OG5_126784 | monodehydroascorbate reductase, putative [Arabidopsis thaliana]	434	254	1234	1	327	1133	6e-150	67.89	82.26
Locus_2972_Transcript_1/1_Confidence_1.000	584	atha|NP_190861 | OG5_127143 | fructose-bisphosphate aldolase, putative [Arabidopsis thaliana]	358	584	330	273	358	339	9e-36	77.27	82.95
Locus_401_Transcript_1/1_Confidence_1.000	1609	atha|NP_190926 | OG5_130716 | diaminopimelate epimerase family protein [Arabidopsis thaliana]	362	493	1338	78	362	1091	7e-143	70.18	81.05
Locus_28007_Transcript_1/1_Confidence_1.000	336	atha|NP_190964 | OG5_126717 | proton-dependent oligopeptide transport (POT) family protein [Arabidopsis thaliana]	602	52	333	247	343	211	2e-18	42.27	64.95
Locus_33647_Transcript_1/1_Confidence_1.000	896	atha|NP_190982 | OG5_126717 | PTR1 (PEPTIDE TRANSPORTER 1); dipeptide transporter/ transporter/ tripeptide transporter [Arabidopsis thaliana]	570	880	2	134	408	639	4e-76	43.58	63.85
Locus_28450_Transcript_1/1_Confidence_1.000	670	atha|NP_190996 | OG5_128804 | RGD3 (ROOT GROWTH DEFECTIVE 3); ATP binding / DNA binding / binding / helicase/ nucleic acid binding [Arabidopsis thaliana]	2038	653	543	2001	2037	159	1e-10	72.97	86.49
Locus_10126_Transcript_1/1_Confidence_1.000	270	atha|NP_191030 | OG5_127743 | carbohydrate transmembrane transporter/ phosphate transmembrane transporter/ sugar:hydrogen symporter [Arabidopsis thaliana]	535	263	3	61	147	298	5e-31	82.76	89.66
Locus_8171_Transcript_1/1_Confidence_1.000	1169	atha|NP_191072 | OG5_190323 | TT5 (TRANSPARENT TESTA 5); chalcone isomerase [Arabidopsis thaliana]	246	925	323	33	233	275	5e-26	34.98	56.16
Locus_12160_Transcript_1/1_Confidence_1.000	5470	atha|NP_191092 | OG5_126596 | PGP20 (P-GLYCOPROTEIN 20); ATPase, coupled to transmembrane movement of substances [Arabidopsis thaliana]	1408	5468	1356	88	1406	3903	0	58.37	73.74
Locus_56092_Transcript_1/1_Confidence_1.000	644	atha|NP_191095 | OG5_136853 | unknown protein [Arabidopsis thaliana]	406	631	230	243	360	171	2e-12	34.53	48.2
Locus_2427_Transcript_1/1_Confidence_1.000	2557	atha|NP_191101 | OG5_126779 | 2-oxoglutarate dehydrogenase E1 component, putative / oxoglutarate decarboxylase, putative / alpha-ketoglutaric dehydrogenase, putative [Arabidopsis thaliana]	1017	2557	1859	785	1017	1009	5e-119	75.54	88.41
Locus_2749_Transcript_1/1_Confidence_1.000	2458	atha|NP_191114 | OG5_129991 | lectin protein kinase, putative [Arabidopsis thaliana]	684	295	1017	38	267	230	1e-17	30.28	49.4
Locus_3456_Transcript_1/1_Confidence_1.000	616	atha|NP_191114 | OG5_129991 | lectin protein kinase, putative [Arabidopsis thaliana]	684	153	614	334	486	465	6e-52	53.9	72.73
Locus_11864_Transcript_1/1_Confidence_1.000	3067	atha|NP_191114 | OG5_129991 | lectin protein kinase, putative [Arabidopsis thaliana]	684	2811	2134	37	262	305	2e-26	35.59	50
Locus_61563_Transcript_1/1_Confidence_1.000	690	atha|NP_191114 | OG5_129991 | lectin protein kinase, putative [Arabidopsis thaliana]	684	686	3	187	400	323	6e-32	37.55	52.84
Locus_3931_Transcript_1/1_Confidence_1.000	1401	atha|NP_191142 | OG5_132497 | EPC1 (ECTOPICALLY PARTING CELLS); UDP-glucosyltransferase/ transferase, transferring glycosyl groups [Arabidopsis thaliana]	334	1009	1401	68	203	450	6e-49	57.35	80.15
Locus_27840_Transcript_1/1_Confidence_1.000	279	atha|NP_191175 | OG5_129981 | bile acid:sodium symporter [Arabidopsis thaliana]	436	1	279	286	377	123	4e-07	32.26	54.84
Locus_21773_Transcript_1/1_Confidence_1.000	589	atha|NP_191182 | OG5_164554 | speckle-type POZ protein-related [Arabidopsis thaliana]	282	589	215	132	246	123	2e-06	26.4	50.4
Locus_13820_Transcript_1/1_Confidence_1.000	1347	atha|NP_191192 | OG5_149537 | N2,N2-dimethylguanosine tRNA methyltransferase family protein [Arabidopsis thaliana]	433	1346	633	202	428	684	3e-82	51.26	69.75
Locus_6493_Transcript_1/1_Confidence_1.000	757	atha|NP_191205 | OG5_130824 | oxidoreductase, zinc-binding dehydrogenase family protein [Arabidopsis thaliana]	348	757	494	254	341	335	2e-34	69.32	81.82
Locus_18661_Transcript_1/1_Confidence_1.000	460	atha|NP_191205 | OG5_130824 | oxidoreductase, zinc-binding dehydrogenase family protein [Arabidopsis thaliana]	348	459	1	117	269	453	4e-53	70.59	83.66
Locus_15361_Transcript_1/1_Confidence_1.000	1628	atha|NP_191216 | OG5_134278 | SET domain-containing protein [Arabidopsis thaliana]	531	311	3	3	102	261	4e-22	48.54	67.96
Locus_20484_Transcript_1/1_Confidence_1.000	550	atha|NP_191243 | OG5_127956 | FAD-dependent oxidoreductase family protein [Arabidopsis thaliana]	483	1	99	447	479	122	3e-06	66.67	81.82
Locus_14768_Transcript_1/1_Confidence_1.000	1892	atha|NP_191249 | OG5_132525 | aladin-related / adracalin-related [Arabidopsis thaliana]	447	159	1592	1	444	1246	2e-163	52.5	69.38
Locus_51899_Transcript_1/1_Confidence_1.000	708	atha|NP_191262 | OG5_130023 | strictosidine synthase family protein [Arabidopsis thaliana]	374	307	708	108	242	362	2e-38	53.33	69.63
Locus_46922_Transcript_1/1_Confidence_1.000	681	atha|NP_191265 | OG5_128324 | binding [Arabidopsis thaliana]	1396	2	679	381	599	555	1e-62	49.78	68.28
Locus_22879_Transcript_1/1_Confidence_1.000	2765	atha|NP_191289 | OG5_130269 | INO80 (INO80 ORTHOLOG); ATP binding / DNA binding / helicase/ nucleic acid binding [Arabidopsis thaliana]	1507	2498	12	184	993	2477	0	59.35	74.34
Locus_71403_Transcript_1/1_Confidence_1.000	272	atha|NP_191292 | OG5_126645 | ACA11 (autoinhibited Ca2+-ATPase 11); calcium-transporting ATPase/ calmodulin binding [Arabidopsis thaliana]	1025	5	268	188	275	322	2e-33	72.73	81.82
Locus_47506_Transcript_1/1_Confidence_1.000	746	atha|NP_191316 | OG5_170581 | binding [Arabidopsis thaliana]	1068	746	108	26	237	210	8e-17	31.39	48.43
Locus_36701_Transcript_1/1_Confidence_1.000	1275	atha|NP_191322 | OG5_136651 | exostosin family protein [Arabidopsis thaliana]	793	1268	3	36	475	942	1e-116	45.15	62.3
Locus_31950_Transcript_1/1_Confidence_1.000	525	atha|NP_191325 | OG5_127924 | NRPA1; DNA binding / DNA-directed RNA polymerase/ zinc ion binding [Arabidopsis thaliana]	1670	523	2	477	642	581	9e-67	61.36	77.27
Locus_6264_Transcript_1/1_Confidence_1.000	915	atha|NP_191462 | OG5_190336 | TT12 (TRANSPARENT TESTA 12); antiporter/ solute:hydrogen antiporter/ transmembrane transporter/ transporter [Arabidopsis thaliana]	507	38	298	414	500	142	5e-08	36.78	56.32
Locus_43268_Transcript_1/1_Confidence_1.000	608	atha|NP_191490 | OG5_128370 | unknown protein [Arabidopsis thaliana]	332	603	232	212	332	255	4e-24	43.41	62.02
Locus_6560_Transcript_1/1_Confidence_1.000	1058	atha|NP_191498 | OG5_132709 | unknown protein [Arabidopsis thaliana]	273	1057	665	143	273	341	6e-35	43.51	65.65
Locus_14215_Transcript_1/1_Confidence_1.000	926	atha|NP_191500 | OG5_129525 | protein kinase family protein [Arabidopsis thaliana]	1241	94	453	28	149	291	2e-26	52.46	73.77
Locus_17684_Transcript_1/1_Confidence_1.000	1143	atha|NP_191586 | OG5_136988 | uclacyanin, putative [Arabidopsis thaliana]	187	680	375	21	120	206	4e-17	38.24	63.73
Locus_22379_Transcript_1/1_Confidence_1.000	1142	atha|NP_191589 | OG5_132561 | RWD domain-containing protein [Arabidopsis thaliana]	366	519	1142	17	226	439	6e-48	42.59	55.09
Locus_44603_Transcript_1/1_Confidence_1.000	879	atha|NP_191633 | OG5_128880 | TTN1 (TITAN 1); tubulin binding [Arabidopsis thaliana]	1254	877	2	611	897	658	7e-76	54.11	72.26
Locus_51452_Transcript_1/1_Confidence_1.000	448	atha|NP_191633 | OG5_128880 | TTN1 (TITAN 1); tubulin binding [Arabidopsis thaliana]	1254	141	446	402	503	309	1e-30	80.39	87.25
Locus_16457_Transcript_1/1_Confidence_1.000	2260	atha|NP_191705 | OG5_170589 | BRH1 (BRASSINOSTEROID-RESPONSIVE RING-H2); protein binding / zinc ion binding [Arabidopsis thaliana]	170	1607	1143	1	148	206	2e-16	32.48	51.59
Locus_2027_Transcript_1/1_Confidence_1.000	252	atha|NP_191706 | OG5_139543 | LHCA2; chlorophyll binding [Arabidopsis thaliana]	257	1	252	124	207	392	3e-46	84.52	92.86
Locus_37948_Transcript_1/1_Confidence_1.000	633	atha|NP_191759 | OG5_128394 | O-methyltransferase family 3 protein [Arabidopsis thaliana]	278	180	1	70	129	227	2e-20	70	83.33
Locus_18623_Transcript_1/1_Confidence_1.000	517	atha|NP_191804 | OG5_160265 | unknown protein [Arabidopsis thaliana]	74	290	147	8	53	131	7e-09	54.17	68.75
Locus_4756_Transcript_1/1_Confidence_1.000	1222	atha|NP_191845 | OG5_144586 | esterase/lipase/thioesterase family protein [Arabidopsis thaliana]	348	1	375	175	299	467	8e-52	65.6	84
Locus_19783_Transcript_1/1_Confidence_1.000	2146	atha|NP_191845 | OG5_144586 | esterase/lipase/thioesterase family protein [Arabidopsis thaliana]	348	1	774	32	289	929	2e-116	63.18	80.23
Locus_10478_Transcript_1/1_Confidence_1.000	318	atha|NP_191911 | OG5_131329 | CCD1 (CAROTENOID CLEAVAGE DIOXYGENASE 1); 9-cis-epoxycarotenoid dioxygenase [Arabidopsis thaliana]	538	203	313	52	88	120	1e-06	56.76	70.27
Locus_1962_Transcript_1/1_Confidence_1.000	898	atha|NP_191958 | OG5_130558 | BAM2 (BETA-AMYLASE 2); beta-amylase [Arabidopsis thaliana]	542	896	447	378	527	657	5e-79	79.33	85.33
Locus_14452_Transcript_1/1_Confidence_1.000	1968	atha|NP_192016 | OG5_144917 | GT72B1; UDP-glucosyltransferase/ UDP-glycosyltransferase/ transferase, transferring glycosyl groups [Arabidopsis thaliana]	480	65	1501	1	463	524	1e-56	31.53	48.19
Locus_28416_Transcript_1/1_Confidence_1.000	686	atha|NP_192016 | OG5_144917 | GT72B1; UDP-glucosyltransferase/ UDP-glycosyltransferase/ transferase, transferring glycosyl groups [Arabidopsis thaliana]	480	650	33	105	311	264	1e-24	36.28	50.23
Locus_13787_Transcript_1/1_Confidence_1.000	893	atha|NP_192022 | OG5_176092 | acetylesterase, putative [Arabidopsis thaliana]	382	490	119	14	145	323	3e-32	53.68	66.91
Locus_20815_Transcript_1/1_Confidence_1.000	1251	atha|NP_192022 | OG5_176092 | acetylesterase, putative [Arabidopsis thaliana]	382	435	860	7	147	279	1e-25	42.57	59.46
Locus_15396_Transcript_1/1_Confidence_1.000	2653	atha|NP_192075 | OG5_127778 | ATABC1 (ARABIDOPSIS THALIANA ABC TRANSPORTER 1); transporter [Arabidopsis thaliana]	623	1343	102	196	609	1581	0	69.08	82.61
Locus_10225_Transcript_1/1_Confidence_1.000	889	atha|NP_192099 | OG5_130126 | GLB1 (GLNB1 HOMOLOG); acetylglutamate kinase regulator [Arabidopsis thaliana]	196	59	427	68	190	499	1e-59	73.98	88.62
Locus_14486_Transcript_1/1_Confidence_1.000	1532	atha|NP_192116 | OG5_126895 | MSH6 (MUTS HOMOLOG 6); damaged DNA binding [Arabidopsis thaliana]	1324	72	1526	303	741	1155	5e-142	49.28	66.26
Locus_56554_Transcript_1/1_Confidence_1.000	328	atha|NP_192120 | OG5_177142 | transcription coactivator [Arabidopsis thaliana]	1329	326	6	59	165	405	3e-44	65.42	79.44
Locus_8647_Transcript_1/1_Confidence_1.000	413	atha|NP_192162 | OG5_156529 | chloroplast thylakoid lumen protein [Arabidopsis thaliana]	216	9	314	112	216	240	2e-23	47.62	66.67
Locus_66864_Transcript_1/1_Confidence_1.000	597	atha|NP_192187 | OG5_163665 | GA1 (GA REQUIRING 1); ent-copalyl diphosphate synthase/ magnesium ion binding [Arabidopsis thaliana]	802	596	3	194	387	504	4e-57	51.01	71.21
Locus_51854_Transcript_1/1_Confidence_1.000	677	atha|NP_192264 | OG5_127693 | ATGSL05 (GLUCAN SYNTHASE-LIKE 5); 1,3-beta-glucan synthase/ transferase, transferring glycosyl groups [Arabidopsis thaliana]	1780	333	4	11	116	345	2e-34	60.91	73.64
Locus_35252_Transcript_1/1_Confidence_1.000	261	atha|NP_192331 | OG5_212573 | AtRLP46 (Receptor Like Protein 46); kinase/ protein binding [Arabidopsis thaliana]	811	2	178	654	712	162	4e-12	54.24	72.88
Locus_3599_Transcript_1/1_Confidence_1.000	2827	atha|NP_192354 | OG5_164568 | WRKY42; transcription factor [Arabidopsis thaliana]	528	1468	734	276	491	479	3e-49	48.81	59.13
Locus_5591_Transcript_1/1_Confidence_1.000	688	atha|NP_192354 | OG5_164568 | WRKY42; transcription factor [Arabidopsis thaliana]	528	2	367	291	416	386	4e-41	65.15	77.27
Locus_20455_Transcript_1/1_Confidence_1.000	884	atha|NP_192397 | OG5_127245 | adenosine/AMP deaminase family protein [Arabidopsis thaliana]	355	626	3	1	220	609	5e-74	55.91	70
Locus_29641_Transcript_1/1_Confidence_1.000	467	atha|NP_192397 | OG5_127245 | adenosine/AMP deaminase family protein [Arabidopsis thaliana]	355	12	230	278	350	210	2e-18	54.79	72.6
Locus_3758_Transcript_1/1_Confidence_1.000	2097	atha|NP_192400 | OG5_127665 | NSF (N-ethylmaleimide sensitive factor); ATP binding / binding / nucleoside-triphosphatase/ nucleotide binding [Arabidopsis thaliana]	742	4	1686	178	737	2113	0	70.94	85.56
Locus_8139_Transcript_1/1_Confidence_1.000	349	atha|NP_192422 | OG5_144092 | equilibrative nucleoside transporter, putative (ENT4) [Arabidopsis thaliana]	418	349	2	34	149	342	5e-37	52.59	74.14
Locus_43085_Transcript_1/1_Confidence_1.000	1483	atha|NP_192571 | OG5_140432 | unknown protein [Arabidopsis thaliana]	504	996	748	343	425	220	4e-17	48.19	73.49
Locus_41340_Transcript_1/1_Confidence_1.000	494	atha|NP_192638 | OG5_129430 | DNA (cytosine-5-)-methyltransferase, putative [Arabidopsis thaliana]	1512	474	1	318	475	471	4e-52	51.9	70.89
Locus_2330_Transcript_1/1_Confidence_1.000	1560	atha|NP_192641 | OG5_132176 | ISA3 (ISOAMYLASE 3); alpha-amylase/ isoamylase [Arabidopsis thaliana]	764	3	1016	429	764	1307	5e-170	71.6	83.14
Locus_3651_Transcript_1/1_Confidence_1.000	847	atha|NP_192673 | OG5_149273 | DNAJ heat shock N-terminal domain-containing protein [Arabidopsis thaliana]	249	788	390	93	215	317	2e-32	51.88	66.92
Locus_31628_Transcript_1/1_Confidence_1.000	1000	atha|NP_192684 | OG5_212580 | ATMYB6; DNA binding / transcription factor [Arabidopsis thaliana]	236	505	885	4	129	520	7e-62	74.8	84.25
Locus_30402_Transcript_1/1_Confidence_1.000	1249	atha|NP_192713 | OG5_134533 | short-chain dehydrogenase/reductase (SDR) family protein [Arabidopsis thaliana]	322	720	1118	17	149	369	4e-38	52.63	70.68
Locus_266_Transcript_1/1_Confidence_1.000	1830	atha|NP_192719 | OG5_160274 | transporter-related [Arabidopsis thaliana]	335	316	1305	1	331	1181	1e-155	72.29	84.04
Locus_5710_Transcript_1/1_Confidence_1.000	1824	atha|NP_192787 | OG5_170611 | oxidoreductase, 2OG-Fe(II) oxygenase family protein [Arabidopsis thaliana]	348	235	1194	15	327	473	4e-51	35.38	53.23
Locus_10352_Transcript_1/1_Confidence_1.000	680	atha|NP_192788 | OG5_170611 | oxidoreductase, 2OG-Fe(II) oxygenase family protein [Arabidopsis thaliana]	349	281	673	45	171	202	1e-16	34.85	51.52
Locus_10876_Transcript_1/1_Confidence_1.000	1937	atha|NP_192788 | OG5_170611 | oxidoreductase, 2OG-Fe(II) oxygenase family protein [Arabidopsis thaliana]	349	1918	980	19	336	691	5e-82	42.55	60.25
Locus_31430_Transcript_1/1_Confidence_1.000	326	atha|NP_192788 | OG5_170611 | oxidoreductase, 2OG-Fe(II) oxygenase family protein [Arabidopsis thaliana]	349	15	326	163	266	206	1e-18	40.38	58.65
Locus_39299_Transcript_1/1_Confidence_1.000	335	atha|NP_192788 | OG5_170611 | oxidoreductase, 2OG-Fe(II) oxygenase family protein [Arabidopsis thaliana]	349	15	335	163	265	226	3e-21	44.86	63.55
Locus_12461_Transcript_1/1_Confidence_1.000	601	atha|NP_192814 | OG5_129618 | MTA (MRNA ADENOSINE METHYLASE); S-adenosylmethionine-dependent methyltransferase/ methyltransferase [Arabidopsis thaliana]	685	599	489	630	666	169	5e-12	75.68	94.59
Locus_8727_Transcript_1/1_Confidence_1.000	2167	atha|NP_192843 | OG5_131283 | AtGH9C3 (Arabidopsis thaliana glycosyl hydrolase 9C3); carbohydrate binding / catalytic/ hydrolase, hydrolyzing O-glycosyl compounds	626	649	2058	26	494	1586	0	62.34	77.23
Locus_15020_Transcript_1/1_Confidence_1.000	1315	atha|NP_192853 | OG5_127015 | TUF (VACUOLAR ATP SYNTHASE SUBUNIT E1); proton-transporting ATPase, rotational mechanism [Arabidopsis thaliana]	230	1099	422	1	226	674	1e-83	70.93	80.18
Locus_23257_Transcript_1/1_Confidence_1.000	729	atha|NP_192868 | OG5_160099 | peroxidase, putative [Arabidopsis thaliana]	326	729	223	156	326	379	4e-41	47.73	63.64
Locus_33357_Transcript_1/1_Confidence_1.000	962	atha|NP_192909 | OG5_135474 | HAP2 (HAPLESS 2) [Arabidopsis thaliana]	705	738	22	248	489	286	4e-26	28.69	50
Locus_4004_Transcript_1/1_Confidence_1.000	1485	atha|NP_192928 | OG5_141633 | unknown protein [Arabidopsis thaliana]	271	487	8	45	204	648	2e-78	71.88	86.25
Locus_3305_Transcript_1/1_Confidence_1.000	1437	atha|NP_192948 | OG5_146454 | SMO1-1 (STEROL-4ALPHA-METHYL OXIDASE 1-1); 4,4-dimethyl-9beta,19-cyclopropylsterol-4alpha-methyl oxidase/ C-4 methylsterol oxidase/ catalytic [Arabidopsis thaliana]	298	558	1379	1	276	890	2e-114	59.06	80.07
Locus_38419_Transcript_1/1_Confidence_1.000	2839	atha|NP_192966 | OG5_127171 | amine oxidase/ copper ion binding / quinone binding [Arabidopsis thaliana]	741	191	2128	82	726	1752	0	52.21	68.09
Locus_3723_Transcript_1/1_Confidence_1.000	808	atha|NP_193002 | OG5_143114 | unknown protein [Arabidopsis thaliana]	652	808	659	602	652	201	1e-15	82.35	92.16
Locus_67436_Transcript_1/1_Confidence_1.000	307	atha|NP_193022 | OG5_147166 | UNE14 (unfertilized embryo sac 14); calcium ion binding [Arabidopsis thaliana]	152	260	75	82	143	192	2e-17	56.45	75.81
Locus_8067_Transcript_1/1_Confidence_1.000	897	atha|NP_193037 | OG5_127317 | oxidoreductase, zinc-binding dehydrogenase family protein [Arabidopsis thaliana]	329	6	680	102	327	626	5e-77	58.59	72.25
Locus_11585_Transcript_1/1_Confidence_1.000	2247	atha|NP_193054 | OG5_129240 | short-chain dehydrogenase/reductase (SDR) family protein [Arabidopsis thaliana]	263	1735	1010	16	260	590	8e-68	46.53	66.12
Locus_10096_Transcript_1/1_Confidence_1.000	1553	atha|NP_193069 | OG5_170620 | unknown protein [Arabidopsis thaliana]	428	3	938	158	425	434	2e-45	34.39	50.64
Locus_15579_Transcript_1/1_Confidence_1.000	529	atha|NP_193076 | OG5_133759 | unknown protein [Arabidopsis thaliana]	319	475	2	11	169	447	4e-52	52.83	69.18
Locus_16277_Transcript_1/1_Confidence_1.000	668	atha|NP_193133 | OG5_156429 | zinc ion binding [Arabidopsis thaliana]	778	130	657	155	309	158	2e-10	24.86	42.54
Locus_28758_Transcript_1/1_Confidence_1.000	375	atha|NP_193159 | OG5_126632 | CBS domain-containing protein-related [Arabidopsis thaliana]	495	64	315	366	444	205	1e-17	55.81	72.09
Locus_984_Transcript_1/1_Confidence_1.000	3556	atha|NP_193195 | OG5_132547 | emb2739 (embryo defective 2739) [Arabidopsis thaliana]	508	83	1432	9	435	969	7e-116	41.72	65.56
Locus_22467_Transcript_1/1_Confidence_1.000	496	atha|NP_193208 | OG5_177937 | PPD2; dioxygenase/ metal ion binding [Arabidopsis thaliana]	315	340	483	7	51	121	2e-06	50	72.92
Locus_5941_Transcript_1/1_Confidence_1.000	2520	atha|NP_193253 | OG5_140339 | SDG2 (SET DOMAIN-CONTAINING PROTEIN 2) [Arabidopsis thaliana]	2335	2025	2516	967	1086	182	1e-11	34.13	42.51
Locus_20514_Transcript_1/1_Confidence_1.000	883	atha|NP_193253 | OG5_140339 | SDG2 (SET DOMAIN-CONTAINING PROTEIN 2) [Arabidopsis thaliana]	2335	540	857	1596	1701	361	1e-35	61.32	80.19
Locus_33244_Transcript_1/1_Confidence_1.000	816	atha|NP_193253 | OG5_140339 | SDG2 (SET DOMAIN-CONTAINING PROTEIN 2) [Arabidopsis thaliana]	2335	396	812	1149	1300	167	3e-11	31.61	45.16
Locus_13175_Transcript_1/1_Confidence_1.000	2935	atha|NP_193319 | OG5_156538 | protein binding [Arabidopsis thaliana]	836	743	1324	60	253	492	2e-49	44.85	61.86
Locus_55048_Transcript_1/1_Confidence_1.000	260	atha|NP_193320 | OG5_129570 | ATRH1; ATP-dependent helicase/ DEAD/H-box RNA helicase binding [Arabidopsis thaliana]	522	7	255	167	254	229	2e-21	57.95	70.45
Locus_36752_Transcript_1/1_Confidence_1.000	300	atha|NP_193324 | OG5_132127 | binding [Arabidopsis thaliana]	1314	67	258	353	419	143	2e-09	49.25	62.69
Locus_50034_Transcript_1/1_Confidence_1.000	343	atha|NP_193324 | OG5_132127 | binding [Arabidopsis thaliana]	1314	341	3	571	692	230	1e-20	47.24	58.27
Locus_60255_Transcript_1/1_Confidence_1.000	1035	atha|NP_193324 | OG5_132127 | binding [Arabidopsis thaliana]	1314	6	458	1056	1203	403	1e-40	62.5	80.92
Locus_66104_Transcript_1/1_Confidence_1.000	249	atha|NP_193327 | OG5_127038 | unknown protein [Arabidopsis thaliana]	241	8	187	152	211	172	2e-14	50	66.67
Locus_28818_Transcript_1/1_Confidence_1.000	549	atha|NP_193361 | OG5_135473 | catalytic/ cation binding / hydrolase, hydrolyzing O-glycosyl compounds [Arabidopsis thaliana]	344	304	543	17	95	168	2e-12	37.5	65
Locus_28420_Transcript_1/1_Confidence_1.000	3012	atha|NP_193430 | OG5_129189 | ATP binding / kinase/ protein kinase/ protein serine/threonine kinase [Arabidopsis thaliana]	889	2387	669	362	855	770	5e-85	34.87	53.33
Locus_29837_Transcript_1/1_Confidence_1.000	349	atha|NP_193463 | OG5_147133 | unknown protein [Arabidopsis thaliana]	99	202	342	43	87	107	1e-05	57.45	72.34
Locus_70928_Transcript_1/1_Confidence_1.000	645	atha|NP_193469 | OG5_130077 | MSH4 (MUTS HOMOLOG 4); ATP binding / damaged DNA binding / mismatched DNA binding [Arabidopsis thaliana]	792	169	645	11	170	538	2e-61	62.5	78.12
Locus_14928_Transcript_1/1_Confidence_1.000	526	atha|NP_193477 | OG5_129289 | palmitoyl protein thioesterase family protein [Arabidopsis thaliana]	308	3	104	262	295	121	2e-06	61.76	85.29
Locus_47247_Transcript_1/1_Confidence_1.000	564	atha|NP_193496 | OG5_129882 | tRNA/rRNA methyltransferase (SpoU) family protein [Arabidopsis thaliana]	1850	5	562	236	400	191	1e-14	30.61	48.98
Locus_9356_Transcript_1/1_Confidence_1.000	976	atha|NP_193560 | OG5_130708 | cytochrome B561-related [Arabidopsis thaliana]	545	948	571	95	220	205	6e-16	35.71	57.14
Locus_53705_Transcript_1/1_Confidence_1.000	348	atha|NP_193560 | OG5_130708 | cytochrome B561-related [Arabidopsis thaliana]	545	107	346	61	135	127	2e-07	42.5	60
Locus_5718_Transcript_1/1_Confidence_1.000	2235	atha|NP_193616 | OG5_139226 | binding / catalytic/ transcription repressor [Arabidopsis thaliana]	596	273	1811	78	591	1804	0	63.62	82.1
Locus_10804_Transcript_1/1_Confidence_1.000	885	atha|NP_193639 | OG5_150238 | EDR2; lipid binding [Arabidopsis thaliana]	718	884	3	288	572	727	8e-88	52.53	65.66
Locus_6784_Transcript_1/1_Confidence_1.000	1960	atha|NP_193656 | OG5_127149 | ATRLI2; transporter [Arabidopsis thaliana]	605	1959	943	267	605	1664	0	90.86	95.87
Locus_6888_Transcript_1/1_Confidence_1.000	1128	atha|NP_193656 | OG5_127149 | ATRLI2; transporter [Arabidopsis thaliana]	605	329	1126	1	266	1305	3e-174	90.6	96.99
Locus_859_Transcript_1/1_Confidence_1.000	704	atha|NP_193699 | OG5_126724 | ARA7; GTP binding [Arabidopsis thaliana]	200	702	511	137	199	207	8e-18	59.38	75
Locus_11670_Transcript_1/1_Confidence_1.000	3955	atha|NP_193747 | OG5_127136 | GSO1 (GASSHO1); ATP binding / protein binding / protein kinase/ protein serine/threonine kinase/ protein tyrosine kinase [Arabidopsis thaliana]	1249	3693	199	26	1238	1939	0	39.29	54.49
Locus_20236_Transcript_1/1_Confidence_1.000	1665	atha|NP_193747 | OG5_127136 | GSO1 (GASSHO1); ATP binding / protein binding / protein kinase/ protein serine/threonine kinase/ protein tyrosine kinase [Arabidopsis thaliana]	1249	593	1609	41	400	273	3e-23	31.68	51.24
Locus_54028_Transcript_1/1_Confidence_1.000	328	atha|NP_193747 | OG5_127136 | GSO1 (GASSHO1); ATP binding / protein binding / protein kinase/ protein serine/threonine kinase/ protein tyrosine kinase [Arabidopsis thaliana]	1249	325	2	24	131	176	1e-13	42.34	62.16
Locus_2100_Transcript_1/1_Confidence_1.000	2300	atha|NP_193769 | OG5_126954 | ATRABE1B (ARABIDOPSIS RAB GTPASE HOMOLOG E1B); GTP binding / GTPase/ translation elongation factor [Arabidopsis thaliana]	476	1839	577	55	475	1649	0	80.76	88.84
Locus_63741_Transcript_1/1_Confidence_1.000	316	atha|NP_193810 | OG5_164583 | calcium-binding protein, putative [Arabidopsis thaliana]	191	180	1	108	167	151	2e-11	51.67	68.33
Locus_49236_Transcript_1/1_Confidence_1.000	951	atha|NP_193839 | OG5_170632 | ATBRCA1; ubiquitin-protein ligase [Arabidopsis thaliana]	941	169	492	185	284	151	5e-09	38.74	51.35
Locus_53276_Transcript_1/1_Confidence_1.000	690	atha|NP_193839 | OG5_170632 | ATBRCA1; ubiquitin-protein ligase [Arabidopsis thaliana]	941	507	226	6	98	309	8e-30	58.51	75.53
Locus_58572_Transcript_1/1_Confidence_1.000	318	atha|NP_193839 | OG5_170632 | ATBRCA1; ubiquitin-protein ligase [Arabidopsis thaliana]	941	174	305	564	616	125	5e-07	49.06	58.49
Locus_9646_Transcript_1/1_Confidence_1.000	2672	atha|NP_193844 | OG5_141558 | AAT1 (AMINO ACID TRANSPORTER 1); L-glutamate transmembrane transporter/ L-lysine transmembrane transporter/ arginine transmembrane transporter/ cationic amino acid transmembrane transporter [Arabidopsis thaliana]	594	677	2344	19	575	1575	0	57.71	73.66
Locus_4786_Transcript_1/1_Confidence_1.000	807	atha|NP_193953 | OG5_127020 | ISU1; structural molecule [Arabidopsis thaliana]	167	793	350	2	150	590	3e-74	73.83	85.91
Locus_1752_Transcript_1/1_Confidence_1.000	975	atha|NP_193955 | OG5_150328 | plastid-lipid associated protein PAP, putative [Arabidopsis thaliana]	310	2	505	142	309	530	2e-62	70.24	81.55
Locus_7360_Transcript_1/1_Confidence_1.000	2311	atha|NP_193956 | OG5_164432 | zinc finger (C3HC4-type RING finger) family protein [Arabidopsis thaliana]	214	1399	1635	113	214	223	4e-18	47.06	58.82
Locus_12743_Transcript_1/1_Confidence_1.000	1017	atha|NP_193962 | OG5_127980 | unknown protein [Arabidopsis thaliana]	108	1014	853	52	105	167	2e-12	57.41	74.07
Locus_27482_Transcript_1/1_Confidence_1.000	557	atha|NP_194014 | OG5_143119 | unknown protein [Arabidopsis thaliana]	193	343	555	86	156	324	3e-35	77.46	88.73
Locus_10249_Transcript_1/1_Confidence_1.000	276	atha|NP_194112 | OG5_147217 | WRKY53; DNA binding / protein binding / transcription activator/ transcription factor [Arabidopsis thaliana]	324	276	148	178	220	125	2e-07	51.16	67.44
Locus_22930_Transcript_1/1_Confidence_1.000	586	atha|NP_194112 | OG5_147217 | WRKY53; DNA binding / protein binding / transcription activator/ transcription factor [Arabidopsis thaliana]	324	32	307	133	224	222	1e-19	52.17	63.04
Locus_4753_Transcript_1/1_Confidence_1.000	1560	atha|NP_194164 | OG5_128710 | unknown protein [Arabidopsis thaliana]	478	831	1	53	335	633	2e-73	47.72	66.67
Locus_69211_Transcript_1/1_Confidence_1.000	610	atha|NP_194245 | OG5_147249 | acid phosphatase, putative [Arabidopsis thaliana]	260	607	248	141	259	293	8e-30	45.83	66.67
Locus_50702_Transcript_1/1_Confidence_1.000	252	atha|NP_194248 | OG5_131717 | DNA binding / DNA-directed RNA polymerase [Arabidopsis thaliana]	311	55	249	116	184	146	2e-10	46.38	68.12
Locus_38969_Transcript_1/1_Confidence_1.000	1475	atha|NP_194389 | OG5_129217 | OPT5 (OLIGOPEPTIDE TRANSPORTER 5); oligopeptide transporter [Arabidopsis thaliana]	753	390	115	31	128	261	4e-22	53.06	70.41
Locus_10640_Transcript_1/1_Confidence_1.000	2478	atha|NP_194413 | OG5_136219 | catalytic/ cation binding / hydrolase, hydrolyzing O-glycosyl compounds [Arabidopsis thaliana]	455	413	1750	11	453	1188	4e-152	49.55	67.71
Locus_8395_Transcript_1/1_Confidence_1.000	1831	atha|NP_194505 | OG5_177012 | ISI1 (IMPAIRED SUCROSE INDUCTION 1); binding [Arabidopsis thaliana]	305	1286	381	1	300	437	1e-46	38.92	58.23
Locus_38137_Transcript_1/1_Confidence_1.000	1042	atha|NP_194634 | OG5_129991 | lectin protein kinase family protein [Arabidopsis thaliana]	669	553	38	37	201	152	4e-09	32	45.71
Locus_16394_Transcript_1/1_Confidence_1.000	456	atha|NP_194662 | OG5_127013 | DER1 (DERLIN-1) [Arabidopsis thaliana]	266	98	9	2	31	117	4e-06	73.33	86.67
Locus_5759_Transcript_1/1_Confidence_1.000	1091	atha|NP_194678 | OG5_126673 | aminopeptidase/ manganese ion binding [Arabidopsis thaliana]	486	1090	623	330	485	596	1e-69	69.23	79.49
Locus_7608_Transcript_1/1_Confidence_1.000	2548	atha|NP_194697 | OG5_127260 | type I phosphodiesterase/nucleotide pyrophosphatase family protein [Arabidopsis thaliana]	496	397	1623	84	493	1207	3e-154	55.47	69.59
Locus_24462_Transcript_1/1_Confidence_1.000	397	atha|NP_194712 | OG5_131018 | VIP3 (vernalization independence 3); nucleotide binding / protein binding [Arabidopsis thaliana]	321	3	233	245	321	282	9e-29	84.42	92.21
Locus_1769_Transcript_1/1_Confidence_1.000	1063	atha|NP_194716 | OG5_131677 | unknown protein [Arabidopsis thaliana]	172	221	670	22	172	485	4e-57	70.86	85.43
Locus_43568_Transcript_1/1_Confidence_1.000	1168	atha|NP_194719 | OG5_126645 | ACA10 (AUTOINHIBITED CA(2+)-ATPASE 10); calcium-transporting ATPase/ calmodulin binding [Arabidopsis thaliana]	1069	945	1166	113	188	177	6e-12	42.11	67.11
Locus_47452_Transcript_1/1_Confidence_1.000	510	atha|NP_194720 | OG5_130120 | ORC5 (ORIGIN RECOGNITION COMPLEX PROTEIN 5); protein binding [Arabidopsis thaliana]	534	5	313	430	531	192	3e-15	39.81	65.05
Locus_40088_Transcript_1/1_Confidence_1.000	615	atha|NP_194735 | OG5_138756 | unknown protein [Arabidopsis thaliana]	401	597	490	361	396	129	4e-07	55.56	75
Locus_25947_Transcript_1/1_Confidence_1.000	607	atha|NP_194748 | OG5_127253 | AHA2; ATPase/ hydrogen-exporting ATPase, phosphorylative mechanism [Arabidopsis thaliana]	948	3	605	206	406	945	2e-119	86.57	96.02
Locus_64724_Transcript_1/1_Confidence_1.000	316	atha|NP_194748 | OG5_127253 | AHA2; ATPase/ hydrogen-exporting ATPase, phosphorylative mechanism [Arabidopsis thaliana]	948	316	2	237	341	518	3e-60	93.33	99.05
Locus_3903_Transcript_1/1_Confidence_1.000	1124	atha|NP_194760 | OG5_128934 | ribitol kinase, putative [Arabidopsis thaliana]	579	1019	3	8	337	1308	6e-175	69.88	83.04
Locus_10605_Transcript_1/1_Confidence_1.000	1181	atha|NP_194801 | OG5_135737 | electron carrier/ oxidoreductase [Arabidopsis thaliana]	707	640	2	74	285	343	5e-33	43.18	61.36
Locus_18338_Transcript_1/1_Confidence_1.000	2151	atha|NP_194821 | OG5_127293 | cytosol aminopeptidase family protein [Arabidopsis thaliana]	583	544	2136	52	583	1581	0	62.66	78.8
Locus_17818_Transcript_1/1_Confidence_1.000	1451	atha|NP_194828 | OG5_129896 | binding [Arabidopsis thaliana]	2549	6	1049	2211	2542	434	3e-43	32.39	52.96
Locus_583_Transcript_1/1_Confidence_1.000	1858	atha|NP_194864 | OG5_135584 | selenium binding [Arabidopsis thaliana]	186	1341	1084	102	185	265	3e-24	51.16	79.07
Locus_64500_Transcript_1/1_Confidence_1.000	279	atha|NP_194957 | OG5_170654 | SD2-5 (S-DOMAIN-2 5); carbohydrate binding / kinase/ protein kinase [Arabidopsis thaliana]	821	27	278	468	550	272	8e-27	59.52	79.76
Locus_9879_Transcript_1/1_Confidence_1.000	391	atha|NP_194958 | OG5_153349 | APX6; L-ascorbate peroxidase/ heme binding / peroxidase [Arabidopsis thaliana]	329	380	234	277	325	187	1e-15	65.31	83.67
Locus_24184_Transcript_1/1_Confidence_1.000	700	atha|NP_194958 | OG5_153349 | APX6; L-ascorbate peroxidase/ heme binding / peroxidase [Arabidopsis thaliana]	329	550	2	105	287	651	1e-81	66.67	78.14
Locus_10625_Transcript_1/1_Confidence_1.000	1351	atha|NP_194976 | OG5_146216 | AKT5; cyclic nucleotide binding / inward rectifier potassium channel [Arabidopsis thaliana]	880	3	1034	546	877	467	8e-49	35.69	51.84
Locus_41609_Transcript_1/1_Confidence_1.000	1086	atha|NP_195008 | OG5_170240 | binding [Arabidopsis thaliana]	1842	1085	3	622	963	331	4e-31	29.19	50.27
Locus_2555_Transcript_1/1_Confidence_1.000	612	atha|NP_195020 | OG5_130263 | GAMMA-VPE (GAMMA VACUOLAR PROCESSING ENZYME); cysteine-type endopeptidase [Arabidopsis thaliana]	494	375	1	60	184	545	2e-64	79.2	86.4
Locus_9713_Transcript_1/1_Confidence_1.000	863	atha|NP_195036 | OG5_130534 | unknown protein [Arabidopsis thaliana]	92	282	46	8	83	202	6e-18	44.3	70.89
Locus_3836_Transcript_1/1_Confidence_1.000	1312	atha|NP_195062 | OG5_136762 | terpene cyclase/mutase-related [Arabidopsis thaliana]	344	1141	146	13	344	947	7e-123	51.2	70.48
Locus_7573_Transcript_1/2_Confidence_1.000	234	atha|NP_195080 | OG5_160286 | metallo-beta-lactamase family protein [Arabidopsis thaliana]	355	233	3	98	175	292	7e-31	70.51	79.49
Locus_9560_Transcript_1/1_Confidence_1.000	2001	atha|NP_195093 | OG5_130106 | L-galactose dehydrogenase (L-GalDH) [Arabidopsis thaliana]	319	760	1716	1	319	1183	2e-155	70.94	82.5
Locus_39963_Transcript_1/1_Confidence_1.000	731	atha|NP_195102 | OG5_127662 | tRNA synthetase class II (D, K and N) family protein [Arabidopsis thaliana]	664	392	724	70	180	330	8e-33	61.26	77.48
Locus_46547_Transcript_1/1_Confidence_1.000	1351	atha|NP_195131 | OG5_128394 | caffeoyl-CoA 3-O-methyltransferase, putative [Arabidopsis thaliana]	259	1138	407	15	258	799	1e-101	62.7	79.51
Locus_6342_Transcript_1/1_Confidence_1.000	780	atha|NP_195157 | OG5_177180 | unknown protein [Arabidopsis thaliana]	1228	1	399	1086	1216	575	6e-65	76.69	88.72
Locus_13388_Transcript_1/1_Confidence_1.000	924	atha|NP_195210 | OG5_130719 | ATMTN2; methylthioadenosine nucleosidase [Arabidopsis thaliana]	254	13	336	147	254	301	6e-30	56.48	68.52
Locus_25200_Transcript_1/1_Confidence_1.000	1151	atha|NP_195243 | no_group | unknown protein [Arabidopsis thaliana]	299	124	636	106	281	179	9e-13	29.28	48.62
Locus_25573_Transcript_1/1_Confidence_1.000	731	atha|NP_195277 | OG5_130552 | MLH3 (MUTL PROTEIN HOMOLOG 3); ATP binding / mismatched DNA binding [Arabidopsis thaliana]	1155	710	141	986	1154	445	1e-47	49.74	64.92
Locus_56761_Transcript_1/1_Confidence_1.000	527	atha|NP_195299 | OG5_126644 | RecQl3; ATP binding / ATP-dependent helicase/ helicase/ nucleic acid binding [Arabidopsis thaliana]	713	183	1	1	63	210	2e-17	63.49	77.78
Locus_18041_Transcript_1/1_Confidence_1.000	814	atha|NP_195329 | OG5_126768 | endonuclease/exonuclease/phosphatase family protein [Arabidopsis thaliana]	408	461	724	320	408	281	1e-26	59.55	71.91
Locus_9049_Transcript_1/1_Confidence_1.000	1738	atha|NP_195361 | OG5_190008 | peroxidase, putative [Arabidopsis thaliana]	331	1431	529	29	331	798	6e-99	51.32	66.45
Locus_22940_Transcript_1/1_Confidence_1.000	286	atha|NP_195361 | OG5_190008 | peroxidase, putative [Arabidopsis thaliana]	331	2	286	34	127	300	7e-32	58.95	75.79
Locus_1191_Transcript_1/1_Confidence_1.000	3557	atha|NP_195381 | OG5_128864 | EMB2754 (EMBRYO DEFECTIVE 2754); binding / small GTPase regulator [Arabidopsis thaliana]	1000	110	3148	1	996	2017	0	44.64	65.59
Locus_5647_Transcript_1/1_Confidence_1.000	2407	atha|NP_195407 | OG5_160289 | IRX14 (irregular xylem 14); transferase, transferring glycosyl groups / xylosyltransferase [Arabidopsis thaliana]	525	1851	517	14	453	893	9e-108	43.54	60.18
Locus_17861_Transcript_1/1_Confidence_1.000	939	atha|NP_195425 | OG5_190488 | unknown protein [Arabidopsis thaliana]	597	928	623	494	595	321	4e-31	54.9	77.45
Locus_20935_Transcript_1/1_Confidence_1.000	1208	atha|NP_195430 | OG5_160290 | hydroxyproline-rich glycoprotein family protein [Arabidopsis thaliana]	513	939	94	93	373	663	8e-79	50	67.36
Locus_73693_Transcript_1/1_Confidence_1.000	604	atha|NP_195430 | OG5_160290 | hydroxyproline-rich glycoprotein family protein [Arabidopsis thaliana]	513	53	274	298	371	192	4e-15	47.3	67.57
Locus_38766_Transcript_1/1_Confidence_1.000	314	atha|NP_195436 | OG5_130183 | unknown protein [Arabidopsis thaliana]	562	236	18	1	73	268	2e-26	63.01	80.82
Locus_15909_Transcript_1/1_Confidence_1.000	1823	atha|NP_195467 | OG5_178001 | ribonuclease III family protein [Arabidopsis thaliana]	537	286	1755	56	535	1451	0	57.72	71.54
Locus_14649_Transcript_1/1_Confidence_1.000	635	atha|NP_195468 | OG5_156356 | peroxidase 50 (PER50) (P50) (PRXR2) [Arabidopsis thaliana]	329	635	3	73	285	544	7e-66	47.89	66.67
Locus_11819_Transcript_1/1_Confidence_1.000	1000	atha|NP_195483 | OG5_127242 | HHP4 (heptahelical protein 4); receptor [Arabidopsis thaliana]	385	2	772	85	385	795	6e-101	52.16	66.11
Locus_16420_Transcript_1/1_Confidence_1.000	1990	atha|NP_195483 | OG5_127242 | HHP4 (heptahelical protein 4); receptor [Arabidopsis thaliana]	385	1259	315	27	385	920	3e-115	54.02	68.42
Locus_21197_Transcript_1/1_Confidence_1.000	611	atha|NP_195494 | OG5_187565 | xyloglucan:xyloglucosyl transferase, putative / xyloglucan endotransglycosylase, putative / endo-xyloglucan transferase, putative [Arabidopsis thaliana]	293	333	611	1	98	151	4e-10	34.69	54.08
Locus_52181_Transcript_1/1_Confidence_1.000	1008	atha|NP_195494 | OG5_187565 | xyloglucan:xyloglucosyl transferase, putative / xyloglucan endotransglycosylase, putative / endo-xyloglucan transferase, putative [Arabidopsis thaliana]	293	508	17	18	180	466	4e-53	52.73	69.09
Locus_5446_Transcript_1/1_Confidence_1.000	2661	atha|NP_195508 | OG5_133765 | lyase [Arabidopsis thaliana]	678	2585	567	19	675	1059	2e-129	37.39	52.9
Locus_15549_Transcript_1/1_Confidence_1.000	1628	atha|NP_195515 | OG5_130184 | tRNA/rRNA methyltransferase (SpoU) family protein [Arabidopsis thaliana]	352	281	1345	21	346	670	4e-80	42.23	59.4
Locus_39487_Transcript_1/1_Confidence_1.000	1880	atha|NP_195525 | OG5_133276 | binding [Arabidopsis thaliana]	1165	1878	1	489	1094	1040	7e-125	40.38	58.22
Locus_1388_Transcript_1/1_Confidence_1.000	399	atha|NP_195585 | OG5_126792 | ROC1 (ROTAMASE CYP 1); peptidyl-prolyl cis-trans isomerase [Arabidopsis thaliana]	172	40	309	83	172	382	6e-45	80	88.89
Locus_31305_Transcript_1/1_Confidence_1.000	420	atha|NP_195596 | OG5_135827 | SAUR15 (SMALL AUXIN UPREGULATED 15) [Arabidopsis thaliana]	89	24	221	25	89	120	3e-07	39.39	57.58
Locus_26189_Transcript_1/1_Confidence_1.000	273	atha|NP_195616 | OG5_131610 | kinesin-related protein (MKRP2) [Arabidopsis thaliana]	1055	163	50	980	1027	132	4e-08	50	64.58
Locus_19072_Transcript_1/1_Confidence_1.000	1616	atha|NP_195623 | OG5_136077 | IMPL2 (MYO-INOSITOL MONOPHOSPHATASE LIKE 2); 3(2),5-bisphosphate nucleotidase/ L-galactose-1-phosphate phosphatase/ inositol or phosphatidylinositol phosphatase/ inositol-1(or 4)-monophosphatase [Arabidopsis thaliana]	346	1377	481	50	345	969	1e-124	63	74.67
Locus_2237_Transcript_1/1_Confidence_1.000	1103	atha|NP_195629 | OG5_126879 | SEC14; phosphatidylinositol transporter [Arabidopsis thaliana]	554	120	1049	35	344	1073	6e-140	67.1	83.55
Locus_25563_Transcript_1/1_Confidence_1.000	684	atha|NP_195652 | no_group | unknown protein [Arabidopsis thaliana]	574	593	87	332	494	372	4e-39	48.24	65.29
Locus_7874_Transcript_1/1_Confidence_1.000	2403	atha|NP_195672 | OG5_169734 | EMB2453 (embryo defective 2453) [Arabidopsis thaliana]	563	2	1060	120	467	775	3e-90	43.91	63.74
Locus_5069_Transcript_1/1_Confidence_1.000	1034	atha|NP_195721 | OG5_156383 | unknown protein [Arabidopsis thaliana]	438	653	6	1	218	538	5e-62	51.38	68.81
Locus_17768_Transcript_1/1_Confidence_1.000	3593	atha|NP_195736 | OG5_175465 | e-cadherin binding protein-related [Arabidopsis thaliana]	360	3165	2674	1	154	388	4e-38	43.29	61.59
Locus_9808_Transcript_1/1_Confidence_1.000	2898	atha|NP_195738 | OG5_126717 | PTR5 (PEPTIDE TRANSPORTER 5); dipeptide transporter/ transporter [Arabidopsis thaliana]	570	619	2313	2	563	983	8e-119	39.23	59.72
Locus_28500_Transcript_1/1_Confidence_1.000	1117	atha|NP_195738 | OG5_126717 | PTR5 (PEPTIDE TRANSPORTER 5); dipeptide transporter/ transporter [Arabidopsis thaliana]	570	1111	281	294	563	523	2e-58	40.07	60.29
Locus_13440_Transcript_1/1_Confidence_1.000	1854	atha|NP_195771 | OG5_152292 | unknown protein [Arabidopsis thaliana]	509	186	1316	117	498	933	5e-116	50.26	67.78
Locus_19482_Transcript_1/1_Confidence_1.000	1226	atha|NP_195786 | OG5_135832 | unknown protein [Arabidopsis thaliana]	656	738	328	15	147	367	2e-36	49.64	68.61
Locus_7510_Transcript_1/1_Confidence_1.000	1327	atha|NP_195787 | OG5_126583 | aldose reductase, putative [Arabidopsis thaliana]	322	1110	145	1	321	888	3e-114	54.01	68.83
Locus_8014_Transcript_1/1_Confidence_1.000	1082	atha|NP_195809 | OG5_144971 | leucine-rich repeat transmembrane protein kinase, putative [Arabidopsis thaliana]	967	67	1044	27	349	392	2e-39	37.5	53.66
Locus_41333_Transcript_1/1_Confidence_1.000	333	atha|NP_195809 | OG5_144971 | leucine-rich repeat transmembrane protein kinase, putative [Arabidopsis thaliana]	967	19	333	385	489	235	2e-21	48.57	66.67
Locus_30766_Transcript_1/1_Confidence_1.000	1282	atha|NP_195813 | OG5_130289 | (1-4)-beta-mannan endohydrolase, putative [Arabidopsis thaliana]	448	509	1282	47	303	786	2e-97	55.04	72.48
Locus_44950_Transcript_1/1_Confidence_1.000	447	atha|NP_195846 | no_group | ATEXPA9 (ARABIDOPSIS THALIANA EXPANSIN A9) [Arabidopsis thaliana]	258	433	5	1	139	402	1e-46	53.15	68.53
Locus_21562_Transcript_1/1_Confidence_1.000	1054	atha|NP_195861 | OG5_130257 | DIE2/ALG10 family [Arabidopsis thaliana]	509	1035	571	358	509	296	1e-27	47.74	69.03
Locus_6459_Transcript_1/1_Confidence_1.000	2849	atha|NP_195897 | OG5_129159 | unknown protein [Arabidopsis thaliana]	214	1627	2037	80	192	206	7e-16	41.61	53.28
Locus_4326_Transcript_1/1_Confidence_1.000	2121	atha|NP_195955 | OG5_164420 | legume lectin family protein [Arabidopsis thaliana]	274	1391	732	54	268	376	3e-38	40.09	55.51
Locus_580_Transcript_1/1_Confidence_1.000	845	atha|NP_196020 | OG5_190523 | unknown protein [Arabidopsis thaliana]	116	245	445	51	115	194	1e-16	56.72	74.63
Locus_48066_Transcript_1/1_Confidence_1.000	264	atha|NP_196053 | OG5_164595 | cytochrome P450, putative / ferulate-5-hydroxylase, putative [Arabidopsis thaliana]	512	41	229	76	133	129	6e-08	46.03	61.9
Locus_31290_Transcript_1/1_Confidence_1.000	291	atha|NP_196063 | OG5_130250 | BTR1L (BINDING TO TOMV RNA 1L (LONG FORM)); nucleic acid binding / single-stranded RNA binding [Arabidopsis thaliana]	313	30	263	37	116	295	4e-31	71.25	86.25
Locus_669_Transcript_1/1_Confidence_1.000	2151	atha|NP_196083 | OG5_152307 | CYP77A9; electron carrier/ heme binding / iron ion binding / monooxygenase/ oxygen binding [Arabidopsis thaliana]	509	1558	77	2	508	930	2e-114	38.52	58.37
Locus_4533_Transcript_1/1_Confidence_1.000	3172	atha|NP_196147 | OG5_142925 | zinc finger (C3HC4-type RING finger) family protein [Arabidopsis thaliana]	176	1511	1819	59	160	253	4e-22	49.53	65.42
Locus_59281_Transcript_1/1_Confidence_1.000	380	atha|NP_196148 | OG5_159864 | ATEXPA2 (ARABIDOPSIS THALIANA EXPANSIN A2) [Arabidopsis thaliana]	255	2	343	137	250	371	2e-42	54.39	77.19
Locus_23573_Transcript_1/1_Confidence_1.000	791	atha|NP_196206 | OG5_170680 | UGT76C1 (UDP-glucosyl transferase 76C1); UDP-glycosyltransferase/ cis-zeatin O-beta-D-glucosyltransferase/ cytokinin 7-beta-glucosyltransferase/ cytokinin 9-beta-glucosyltransferase/ trans-zeatin O-beta-D-glucosyltransferase/ transferase, transferring gl	464	2	313	360	455	197	2e-15	34.62	59.62
Locus_65951_Transcript_1/1_Confidence_1.000	995	atha|NP_196222 | OG5_190532 | self-incompatibility protein-related [Arabidopsis thaliana]	150	765	409	21	135	139	2e-08	32.52	48.78
Locus_100_Transcript_1/1_Confidence_1.000	1784	atha|NP_196290 | OG5_164603 | peroxidase, putative [Arabidopsis thaliana]	335	154	1095	19	333	841	5e-105	51.58	66.46
Locus_5502_Transcript_1/1_Confidence_1.000	305	atha|NP_196307 | OG5_169987 | CYP93D1; electron carrier/ heme binding / iron ion binding / monooxygenase/ oxygen binding [Arabidopsis thaliana]	507	2	304	188	299	126	2e-07	34.21	55.26
Locus_2774_Transcript_1/1_Confidence_1.000	1038	atha|NP_196351 | OG5_128393 | calnexin, putative [Arabidopsis thaliana]	532	3	497	381	532	223	4e-18	37.95	62.05
Locus_41645_Transcript_1/1_Confidence_1.000	610	atha|NP_196383 | OG5_127751 | structural maintenance of chromosomes (SMC) family protein [Arabidopsis thaliana]	1058	204	608	16	150	433	1e-46	60	79.26
Locus_46450_Transcript_1/1_Confidence_1.000	552	atha|NP_196409 | OG5_128654 | DGK1 (DIACYLGLYCEROL KINASE1); calcium ion binding / diacylglycerol kinase [Arabidopsis thaliana]	728	2	151	679	728	205	1e-16	80	86
Locus_18143_Transcript_1/1_Confidence_1.000	809	atha|NP_196434 | OG5_134807 | EMB1873 (EMBRYO DEFECTIVE 1873); agmatine deiminase [Arabidopsis thaliana]	383	2	808	37	304	979	8e-130	65.8	77.7
Locus_28553_Transcript_1/1_Confidence_1.000	1179	atha|NP_196487 | OG5_128940 | KIWI; DNA binding / protein binding / transcription coactivator [Arabidopsis thaliana]	107	659	417	28	107	177	1e-13	45.68	62.96
Locus_59736_Transcript_1/1_Confidence_1.000	333	atha|NP_196559 | OG5_164609 | CYP78A7; electron carrier/ heme binding / iron ion binding / monooxygenase/ oxygen binding [Arabidopsis thaliana]	536	283	5	259	354	152	1e-10	37.5	57.29
Locus_27763_Transcript_1/1_Confidence_1.000	1937	atha|NP_196581 | OG5_131121 | transporter-related [Arabidopsis thaliana]	488	1933	1151	208	485	792	4e-95	56.47	74.46
Locus_39440_Transcript_1/1_Confidence_1.000	998	atha|NP_196599 | OG5_170692 | helicase domain-containing protein / IBR domain-containing protein / zinc finger protein-related [Arabidopsis thaliana]	1775	997	2	335	666	860	7e-102	55.36	69.94
Locus_31725_Transcript_1/1_Confidence_1.000	2002	atha|NP_196620 | OG5_156559 | unknown protein [Arabidopsis thaliana]	246	1163	1825	1	232	474	4e-52	44.4	66.38
Locus_73755_Transcript_1/1_Confidence_1.000	254	atha|NP_196667 | OG5_146601 | KNAT4 (KNOTTED1-LIKE HOMEOBOX GENE 4); transcription activator/ transcription factor [Arabidopsis thaliana]	393	217	2	118	191	150	8e-11	39.19	59.46
Locus_24736_Transcript_1/1_Confidence_1.000	495	atha|NP_196671 | OG5_130110 | SYTD [Arabidopsis thaliana]	569	3	491	54	218	425	3e-47	46.06	69.09
Locus_22700_Transcript_1/1_Confidence_1.000	1318	atha|NP_196696 | OG5_133209 | endonuclease/exonuclease/phosphatase family protein [Arabidopsis thaliana]	754	881	1318	160	303	450	7e-47	56.85	75.34
Locus_36677_Transcript_1/1_Confidence_1.000	802	atha|NP_196708 | OG5_170693 | DNA binding / nucleic acid binding [Arabidopsis thaliana]	696	797	408	551	676	161	1e-10	34.09	53.03
Locus_27134_Transcript_1/1_Confidence_1.000	1140	atha|NP_196720 | OG5_170402 | TINY2 (TINY2); DNA binding / transcription factor [Arabidopsis thaliana]	236	2	220	53	125	254	3e-23	75.34	87.67
Locus_2117_Transcript_1/1_Confidence_1.000	2153	atha|NP_196758 | OG5_138768 | unknown protein [Arabidopsis thaliana]	105	871	1101	30	105	195	2e-15	51.28	73.08
Locus_72781_Transcript_1/1_Confidence_1.000	321	atha|NP_196772 | OG5_127390 | elongation factor 1B alpha-subunit 1 (eEF1Balpha1) [Arabidopsis thaliana]	228	290	75	155	228	192	7e-17	50	67.57
Locus_16351_Transcript_1/1_Confidence_1.000	283	atha|NP_196779 | OG5_126600 | CPK17; ATP binding / calcium ion binding / calmodulin-dependent protein kinase/ kinase/ protein kinase/ protein serine/threonine kinase [Arabidopsis thaliana]	528	109	282	422	479	248	6e-24	72.41	91.38
Locus_13073_Transcript_1/1_Confidence_1.000	2651	atha|NP_196814 | OG5_178046 | unknown protein [Arabidopsis thaliana]	354	1775	897	61	354	860	2e-104	58.39	72.82
Locus_13205_Transcript_1/1_Confidence_1.000	709	atha|NP_196844 | OG5_190568 | proton-dependent oligopeptide transport (POT) family protein [Arabidopsis thaliana]	624	4	279	532	623	154	5e-10	36.96	51.09
Locus_7986_Transcript_1/1_Confidence_1.000	922	atha|NP_196845 | OG5_150349 | immunophilin / FKBP-type peptidyl-prolyl cis-trans isomerase family protein [Arabidopsis thaliana]	256	354	866	86	256	680	7e-86	74.85	88.3
Locus_23416_Transcript_1/1_Confidence_1.000	1695	atha|NP_196857 | OG5_158409 | KEG (KEEP ON GOING); protein binding / protein kinase/ ubiquitin-protein ligase [Arabidopsis thaliana]	1625	1694	3	703	1266	2368	0	73.94	89.18
Locus_56723_Transcript_1/1_Confidence_1.000	262	atha|NP_196857 | OG5_158409 | KEG (KEEP ON GOING); protein binding / protein kinase/ ubiquitin-protein ligase [Arabidopsis thaliana]	1625	12	260	165	247	292	2e-29	60.24	81.93
Locus_30866_Transcript_1/1_Confidence_1.000	327	atha|NP_196873 | OG5_132083 | alpha-N-acetylglucosaminidase family / NAGLU family [Arabidopsis thaliana]	806	3	323	342	448	473	2e-54	75.7	89.72
Locus_1204_Transcript_1/1_Confidence_1.000	329	atha|NP_196908 | OG5_127220 | mitochondrial phosphate transporter [Arabidopsis thaliana]	375	329	36	263	360	456	5e-54	86.73	92.86
Locus_21924_Transcript_1/1_Confidence_1.000	2313	atha|NP_196908 | OG5_127220 | mitochondrial phosphate transporter [Arabidopsis thaliana]	375	345	1223	59	351	1022	2e-129	69.28	82.25
Locus_13229_Transcript_1/1_Confidence_1.000	639	atha|NP_196928 | OG5_127876 | unknown protein [Arabidopsis thaliana]	256	391	639	1	83	175	2e-13	68.67	77.11
Locus_9426_Transcript_1/1_Confidence_1.000	2366	atha|NP_196956 | OG5_128009 | pescadillo-related [Arabidopsis thaliana]	590	230	1828	3	576	1403	0	51.02	66.72
Locus_8217_Transcript_1/1_Confidence_1.000	1023	atha|NP_196958 | OG5_144963 | proline-rich family protein [Arabidopsis thaliana]	547	62	370	116	218	306	4e-29	56.31	78.64
Locus_1047_Transcript_1/1_Confidence_1.000	513	atha|NP_196972 | OG5_153364 | universal stress protein (USP) family protein [Arabidopsis thaliana]	175	496	230	87	175	309	2e-33	58.43	78.65
Locus_7799_Transcript_1/1_Confidence_1.000	1775	atha|NP_197006 | OG5_127846 | SNL2 (SIN3-LIKE 2) [Arabidopsis thaliana]	1367	1160	393	337	641	359	1e-33	31.35	43.57
Locus_34247_Transcript_1/1_Confidence_1.000	694	atha|NP_197021 | OG5_129037 | tyrosyl-DNA phosphodiesterase-related [Arabidopsis thaliana]	605	3	563	427	605	559	4e-65	59.57	70.21
Locus_52292_Transcript_1/1_Confidence_1.000	347	atha|NP_197022 | OG5_142892 | peroxidase, putative [Arabidopsis thaliana]	329	343	38	227	328	198	2e-17	42.31	63.46
Locus_25791_Transcript_1/1_Confidence_1.000	1664	atha|NP_197055 | OG5_164166 | unknown protein [Arabidopsis thaliana]	497	582	85	311	476	355	2e-34	54.82	75.9
Locus_18226_Transcript_1/1_Confidence_1.000	2224	atha|NP_197058 | OG5_129436 | EMB2773 (EMBRYO DEFECTIVE 2773); binding / protein binding / zinc ion binding [Arabidopsis thaliana]	1846	2224	5	82	806	991	4e-114	38.85	55.67
Locus_34682_Transcript_1/1_Confidence_1.000	343	atha|NP_197072 | OG5_128290 | binding [Arabidopsis thaliana]	2153	1	342	99	212	421	4e-46	87.72	91.23
Locus_37292_Transcript_1/1_Confidence_1.000	926	atha|NP_197098 | OG5_159507 | binding / catalytic/ oxidoreductase [Arabidopsis thaliana]	364	5	205	284	350	173	4e-12	47.76	67.16
Locus_40265_Transcript_1/1_Confidence_1.000	276	atha|NP_197098 | OG5_159507 | binding / catalytic/ oxidoreductase [Arabidopsis thaliana]	364	201	1	229	295	189	3e-16	55.22	68.66
Locus_24984_Transcript_1/1_Confidence_1.000	800	atha|NP_197108 | OG5_140269 | regulator of chromosome condensation (RCC1) family protein [Arabidopsis thaliana]	396	162	1	5	58	147	6e-09	53.7	72.22
Locus_12440_Transcript_1/1_Confidence_1.000	893	atha|NP_197125 | OG5_132761 | HEAT repeat-containing protein [Arabidopsis thaliana]	1180	891	439	1010	1169	346	1e-33	48.75	63.75
Locus_30699_Transcript_1/1_Confidence_1.000	440	atha|NP_197171 | OG5_131089 | ORC3 (ORIGIN RECOGNITION COMPLEX SUBUNIT 3); protein binding [Arabidopsis thaliana]	734	252	440	556	618	169	2e-12	44.44	71.43
Locus_43877_Transcript_1/1_Confidence_1.000	285	atha|NP_197187 | OG5_131652 | ATTERT (TELOMERASE REVERSE TRANSCRIPTASE); telomerase/ telomeric template RNA reverse transcriptase [Arabidopsis thaliana]	1123	206	54	447	497	127	2e-07	45.1	60.78
Locus_19481_Transcript_1/1_Confidence_1.000	702	atha|NP_197193 | OG5_129836 | CSLD2 (CELLULOSE-SYNTHASE LIKE D2); cellulose synthase/ transferase, transferring glycosyl groups [Arabidopsis thaliana]	1145	2	700	841	1073	1132	1e-144	89.27	97.42
Locus_18368_Transcript_1/1_Confidence_1.000	413	atha|NP_197197 | OG5_170702 | unknown protein [Arabidopsis thaliana]	99	316	179	49	94	151	2e-11	58.7	76.09
Locus_61416_Transcript_1/1_Confidence_1.000	273	atha|NP_197226 | OG5_156570 | SDG40 (SET DOMAIN GROUP 40) [Arabidopsis thaliana]	491	111	272	5	58	138	5e-09	53.7	64.81
Locus_35310_Transcript_1/1_Confidence_1.000	253	atha|NP_197270 | OG5_134851 | disease resistance protein (TIR-NBS-LRR class), putative [Arabidopsis thaliana]	1294	16	168	194	244	135	1e-08	47.06	72.55
Locus_37299_Transcript_2/2_Confidence_1.000	266	atha|NP_197270 | OG5_134851 | disease resistance protein (TIR-NBS-LRR class), putative [Arabidopsis thaliana]	1294	3	200	187	246	120	2e-06	37.88	59.09
Locus_17644_Transcript_1/1_Confidence_1.000	2957	atha|NP_197399 | OG5_160215 | binding [Arabidopsis thaliana]	835	1381	2955	60	541	775	3e-86	35.65	53.85
Locus_11505_Transcript_1/1_Confidence_1.000	2548	atha|NP_197407 | OG5_170498 | unknown protein [Arabidopsis thaliana]	551	900	2330	82	549	1166	3e-147	47.82	64.86
Locus_46856_Transcript_1/1_Confidence_1.000	285	atha|NP_197407 | OG5_170498 | unknown protein [Arabidopsis thaliana]	551	1	285	390	480	200	3e-17	43.16	58.95
Locus_60097_Transcript_1/1_Confidence_1.000	401	atha|NP_197407 | OG5_170498 | unknown protein [Arabidopsis thaliana]	551	2	397	145	268	291	3e-29	43.94	59.09
Locus_65907_Transcript_1/1_Confidence_1.000	403	atha|NP_197407 | OG5_170498 | unknown protein [Arabidopsis thaliana]	551	402	10	421	549	328	2e-34	48.09	64.12
Locus_66120_Transcript_1/1_Confidence_1.000	361	atha|NP_197407 | OG5_170498 | unknown protein [Arabidopsis thaliana]	551	361	2	316	435	332	3e-35	55.37	70.25
Locus_17944_Transcript_1/1_Confidence_1.000	1757	atha|NP_197414 | OG5_130113 | GPI transamidase component family protein / Gaa1-like family protein [Arabidopsis thaliana]	699	7	1590	210	694	793	1e-93	38.67	53.78
Locus_12962_Transcript_1/1_Confidence_1.000	1673	atha|NP_197431 | OG5_128701 | unknown protein [Arabidopsis thaliana]	398	217	1164	89	397	869	9e-109	53.94	71.92
Locus_1594_Transcript_1/1_Confidence_1.000	1371	atha|NP_197445 | OG5_127062 | cinnamyl-alcohol dehydrogenase, putative (CAD) [Arabidopsis thaliana]	326	12	854	45	320	733	9e-91	50.53	69.4
Locus_9884_Transcript_1/1_Confidence_1.000	2082	atha|NP_197445 | OG5_127062 | cinnamyl-alcohol dehydrogenase, putative (CAD) [Arabidopsis thaliana]	326	1330	371	7	321	633	2e-73	49.22	65.73
Locus_3424_Transcript_1/1_Confidence_1.000	1859	atha|NP_197469 | OG5_127611 | leucine-rich repeat family protein [Arabidopsis thaliana]	328	245	1195	12	327	1006	2e-129	59.62	77.6
Locus_3319_Transcript_1/1_Confidence_1.000	723	atha|NP_197477 | OG5_127710 | dicarboxylate/tricarboxylate carrier (DTC) [Arabidopsis thaliana]	298	525	722	2	67	269	1e-25	74.24	87.88
Locus_4418_Transcript_1/1_Confidence_1.000	1872	atha|NP_197477 | OG5_127710 | dicarboxylate/tricarboxylate carrier (DTC) [Arabidopsis thaliana]	298	1870	1181	68	298	960	7e-123	82.68	91.34
Locus_19592_Transcript_1/1_Confidence_1.000	1194	atha|NP_197491 | OG5_128731 | SOH1 family protein [Arabidopsis thaliana]	196	745	374	5	131	524	4e-62	75	85.94
Locus_6626_Transcript_1/1_Confidence_1.000	1338	atha|NP_197535 | OG5_127697 | TIP1 (TIP GROWTH DEFECTIVE 1); S-acyltransferase/ acyl binding [Arabidopsis thaliana]	620	1285	32	1	415	1493	0	65.4	79.62
Locus_22176_Transcript_1/1_Confidence_1.000	807	atha|NP_197538 | OG5_155539 | PHT4;5; inorganic phosphate transmembrane transporter [Arabidopsis thaliana]	517	807	1	257	499	733	5e-91	56.88	71.38
Locus_22114_Transcript_1/1_Confidence_1.000	1176	atha|NP_197565 | OG5_135565 | COPT5; copper ion transmembrane transporter/ high affinity copper ion transmembrane transporter [Arabidopsis thaliana]	146	495	917	1	143	294	2e-29	45.83	59.03
Locus_34885_Transcript_1/1_Confidence_1.000	1503	atha|NP_197565 | OG5_135565 | COPT5; copper ion transmembrane transporter/ high affinity copper ion transmembrane transporter [Arabidopsis thaliana]	146	361	711	1	130	226	1e-19	38.93	54.96
Locus_20527_Transcript_1/1_Confidence_1.000	1992	atha|NP_197595 | OG5_129218 | glycosyl hydrolase family 3 protein [Arabidopsis thaliana]	624	1022	1978	26	345	1205	2e-154	66.56	82.5
Locus_7767_Transcript_1/1_Confidence_1.000	1231	atha|NP_197606 | OG5_170707 | unknown protein [Arabidopsis thaliana]	225	1	507	22	189	652	1e-80	79.88	89.94
Locus_28919_Transcript_1/1_Confidence_1.000	678	atha|NP_197608 | OG5_156510 | leucine-rich repeat protein, putative [Arabidopsis thaliana]	218	437	3	27	171	492	2e-59	66.9	77.24
Locus_5327_Transcript_1/1_Confidence_1.000	1222	atha|NP_197816 | OG5_212816 | unknown protein [Arabidopsis thaliana]	1607	936	13	132	459	582	2e-63	41.69	58.02
Locus_24712_Transcript_1/1_Confidence_1.000	1684	atha|NP_197816 | OG5_212816 | unknown protein [Arabidopsis thaliana]	1607	1683	484	490	863	470	2e-47	31.8	49.03
Locus_32689_Transcript_1/1_Confidence_1.000	542	atha|NP_197833 | OG5_128942 | unknown protein [Arabidopsis thaliana]	554	438	542	1	35	134	8e-08	65.71	82.86
Locus_40095_Transcript_1/1_Confidence_1.000	1104	atha|NP_197872 | OG5_152339 | CYP714A2; electron carrier/ heme binding / iron ion binding / monooxygenase/ oxygen binding [Arabidopsis thaliana]	525	1078	485	327	520	463	3e-50	45.77	62.69
Locus_27655_Transcript_1/1_Confidence_1.000	403	atha|NP_197879 | OG5_164632 | ABC1 family protein [Arabidopsis thaliana]	719	1	141	174	220	165	6e-12	63.83	82.98
Locus_15173_Transcript_1/1_Confidence_1.000	2243	atha|NP_197889 | OG5_143130 | unknown protein [Arabidopsis thaliana]	736	563	1756	250	647	299	4e-26	33.92	58.29
Locus_19969_Transcript_1/1_Confidence_1.000	283	atha|NP_197919 | OG5_131416 | PLDALPHA3 (PHOSPHLIPASE D ALPHA 3); phospholipase D [Arabidopsis thaliana]	820	267	115	772	820	128	2e-07	49.02	66.67
Locus_17990_Transcript_1/1_Confidence_1.000	2295	atha|NP_197949 | OG5_150096 | unknown protein [Arabidopsis thaliana]	360	973	1866	67	354	872	3e-107	52.68	69.8
Locus_57197_Transcript_1/1_Confidence_1.000	413	atha|NP_198005 | OG5_212821 | plastocyanin-like domain-containing protein / mavicyanin, putative [Arabidopsis thaliana]	187	237	4	19	95	166	4e-13	41.03	65.38
Locus_1419_Transcript_1/1_Confidence_1.000	477	atha|NP_198149 | OG5_129596 | binding [Arabidopsis thaliana]	1629	101	475	732	821	140	2e-08	32	45.6
Locus_40987_Transcript_1/1_Confidence_1.000	784	atha|NP_198149 | OG5_129596 | binding [Arabidopsis thaliana]	1629	783	79	484	713	567	2e-63	56.3	70.59
Locus_6828_Transcript_1/1_Confidence_1.000	416	atha|NP_198334 | OG5_168300 | PAP26 (PURPLE ACID PHOSPHATASE 26); acid phosphatase/ protein serine/threonine phosphatase [Arabidopsis thaliana]	475	42	416	4	123	297	3e-30	48	65.6
Locus_5237_Transcript_1/1_Confidence_1.000	522	atha|NP_198462 | no_group | cytochrome P450 family [Arabidopsis thaliana]	140	3	284	42	136	231	3e-22	48.42	66.32
Locus_58128_Transcript_1/1_Confidence_1.000	365	atha|NP_198462 | no_group | cytochrome P450 family [Arabidopsis thaliana]	140	364	62	37	136	223	1e-21	39.22	65.69
Locus_22491_Transcript_1/1_Confidence_1.000	759	atha|NP_198579 | OG5_129893 | EMB2656 (EMBRYO DEFECTIVE 2656); binding [Arabidopsis thaliana]	1051	2	721	146	387	483	8e-53	40.98	61.89
Locus_16920_Transcript_1/1_Confidence_1.000	1102	atha|NP_198661 | OG5_126554 | CYP735A1; electron carrier/ heme binding / iron ion binding / monooxygenase/ oxygen binding [Arabidopsis thaliana]	518	349	1026	8	229	329	5e-32	30.97	50.44
Locus_71296_Transcript_1/1_Confidence_1.000	429	atha|NP_198728 | OG5_133561 | germin-like protein, putative [Arabidopsis thaliana]	221	150	428	3	117	118	2e-06	31.03	43.97
Locus_1189_Transcript_1/1_Confidence_1.000	3266	atha|NP_198756 | OG5_128815 | PTEN1; phosphatase [Arabidopsis thaliana]	412	1967	840	19	396	1176	4e-148	57.07	72.25
Locus_16216_Transcript_1/1_Confidence_1.000	766	atha|NP_198768 | OG5_144996 | unknown protein [Arabidopsis thaliana]	230	760	248	57	229	369	2e-40	38.64	65.34
Locus_41107_Transcript_1/1_Confidence_1.000	746	atha|NP_198774 | OG5_178088 | peroxidase, putative [Arabidopsis thaliana]	319	3	314	212	319	213	4e-18	42.59	62.04
Locus_8036_Transcript_1/1_Confidence_1.000	693	atha|NP_198869 | OG5_128126 | unknown protein [Arabidopsis thaliana]	287	343	690	59	174	446	2e-51	64.66	80.17
Locus_17307_Transcript_1/1_Confidence_1.000	650	atha|NP_198877 | OG5_126704 | glycerol-3-phosphate dehydrogenase (NAD+) / GPDH [Arabidopsis thaliana]	400	10	645	35	242	672	3e-84	65.57	79.72
Locus_35375_Transcript_1/1_Confidence_1.000	414	atha|NP_199039 | OG5_160002 | scpl42 (serine carboxypeptidase-like 42); serine-type carboxypeptidase [Arabidopsis thaliana]	473	400	2	147	280	359	7e-39	51.11	65.93
Locus_14104_Transcript_1/1_Confidence_1.000	3036	atha|NP_199050 | OG5_178094 | kelch repeat-containing F-box family protein [Arabidopsis thaliana]	563	2130	1567	356	541	204	1e-14	31	48
Locus_3239_Transcript_1/1_Confidence_1.000	542	atha|NP_199052 | OG5_131537 | unknown protein [Arabidopsis thaliana]	447	175	5	20	76	223	2e-19	68.42	82.46
Locus_14009_Transcript_1/2_Confidence_1.000	287	atha|NP_199052 | OG5_131537 | unknown protein [Arabidopsis thaliana]	447	49	183	116	160	190	4e-17	73.33	82.22
Locus_14009_Transcript_2/2_Confidence_1.000	277	atha|NP_199052 | OG5_131537 | unknown protein [Arabidopsis thaliana]	447	49	234	116	177	263	2e-26	74.19	83.87
Locus_4510_Transcript_1/1_Confidence_1.000	1610	atha|NP_199066 | OG5_160122 | disease resistance-responsive family protein [Arabidopsis thaliana]	182	938	534	37	164	210	5e-17	38.13	52.52
Locus_35184_Transcript_1/1_Confidence_1.000	756	atha|NP_199081 | OG5_170728 | agenet domain-containing protein [Arabidopsis thaliana]	294	189	749	25	200	340	9e-36	39.04	58.82
Locus_69994_Transcript_1/1_Confidence_1.000	333	atha|NP_199081 | OG5_170728 | agenet domain-containing protein [Arabidopsis thaliana]	294	333	13	134	236	153	3e-11	38.32	57.94
Locus_19146_Transcript_1/1_Confidence_1.000	344	atha|NP_199084 | OG5_144888 | transcriptional factor B3 family protein [Arabidopsis thaliana]	211	308	81	125	195	120	5e-07	36.84	52.63
Locus_36976_Transcript_1/1_Confidence_1.000	374	atha|NP_199084 | OG5_144888 | transcriptional factor B3 family protein [Arabidopsis thaliana]	211	127	366	51	132	139	1e-09	41.46	54.88
Locus_15698_Transcript_1/1_Confidence_1.000	1242	atha|NP_199119 | OG5_153375 | unknown protein [Arabidopsis thaliana]	158	749	1093	43	158	462	2e-53	74.14	87.07
Locus_12626_Transcript_1/1_Confidence_1.000	293	atha|NP_199150 | OG5_127743 | PHT3 (PHOSPHATE TRANSPORTER 3); carbohydrate transmembrane transporter/ inorganic phosphate transmembrane transporter/ phosphate transmembrane transporter/ sugar:hydrogen symporter [Arabidopsis thaliana]	521	293	3	208	291	267	1e-26	52.58	63.92
Locus_8943_Transcript_1/1_Confidence_1.000	420	atha|NP_199207 | OG5_127257 | HOT5 (sensitive to hot temperatures 5); S-(hydroxymethyl)glutathione dehydrogenase/ S-nitrosoglutathione reductase [Arabidopsis thaliana]	379	12	419	60	196	348	1e-37	59.85	72.26
Locus_44301_Transcript_1/1_Confidence_1.000	344	atha|NP_199238 | OG5_210114 | unknown protein [Arabidopsis thaliana]	403	6	137	67	110	122	8e-07	47.73	75
Locus_17457_Transcript_1/1_Confidence_1.000	285	atha|NP_199275 | OG5_163864 | CYP706A3; electron carrier/ heme binding / iron ion binding / monooxygenase/ oxygen binding [Arabidopsis thaliana]	519	34	264	126	202	118	2e-06	29.87	54.55
Locus_62834_Transcript_1/1_Confidence_1.000	260	atha|NP_199283 | OG5_127136 | GSO2 (GASSHO 2); ATP binding / protein binding / protein kinase/ protein serine/threonine kinase/ protein tyrosine kinase [Arabidopsis thaliana]	1252	3	248	29	107	130	8e-08	34.94	51.81
Locus_44691_Transcript_1/1_Confidence_1.000	263	atha|NP_199403 | OG5_135835 | GDSL-motif lipase/hydrolase family protein [Arabidopsis thaliana]	372	1	159	302	352	141	1e-09	52.83	64.15
Locus_64117_Transcript_1/1_Confidence_1.000	528	atha|NP_199421 | OG5_178104 | unknown protein [Arabidopsis thaliana]	214	2	454	60	212	233	7e-22	39.61	54.55
Locus_2840_Transcript_1/1_Confidence_1.000	3148	atha|NP_199445 | OG5_189404 | FLS2 (FLAGELLIN-SENSITIVE 2); ATP binding / kinase/ protein binding / protein serine/threonine kinase/ transmembrane receptor protein serine/threonine kinase [Arabidopsis thaliana]	1173	3103	2	30	1062	1323	1e-160	35.91	53.77
Locus_57359_Transcript_1/1_Confidence_1.000	1114	atha|NP_199445 | OG5_189404 | FLS2 (FLAGELLIN-SENSITIVE 2); ATP binding / kinase/ protein binding / protein serine/threonine kinase/ transmembrane receptor protein serine/threonine kinase [Arabidopsis thaliana]	1173	448	1101	30	232	165	2e-10	29.36	45.41
Locus_12367_Transcript_1/1_Confidence_1.000	852	atha|NP_199592 | OG5_190682 | PFK2 (PHOSPHOFRUCTOKINASE 2); 6-phosphofructokinase [Arabidopsis thaliana]	444	851	180	214	439	811	2e-103	63.27	79.65
Locus_14920_Transcript_1/1_Confidence_1.000	1312	atha|NP_199592 | OG5_190682 | PFK2 (PHOSPHOFRUCTOKINASE 2); 6-phosphofructokinase [Arabidopsis thaliana]	444	723	1310	10	212	606	8e-71	58.13	73.89
Locus_1538_Transcript_1/1_Confidence_1.000	1190	atha|NP_199607 | no_group | ATRABA4C; GTP binding [Arabidopsis thaliana]	223	2	442	77	222	554	3e-66	70.27	82.43
Locus_50424_Transcript_1/1_Confidence_1.000	385	atha|NP_199671 | OG5_127440 | ATSMC3 (ARABIDOPSIS THALIANA STRUCTURAL MAINTENANCE OF CHROMOSOME 3); ATP binding / transporter [Arabidopsis thaliana]	1241	385	5	112	238	530	7e-61	78.74	88.19
Locus_6573_Transcript_1/1_Confidence_1.000	1008	atha|NP_199685 | OG5_212883 | leucine-rich repeat family protein / protein kinase family protein [Arabidopsis thaliana]	895	2	604	678	880	669	1e-77	59.31	80.39
Locus_27757_Transcript_1/1_Confidence_1.000	1947	atha|NP_199685 | OG5_212883 | leucine-rich repeat family protein / protein kinase family protein [Arabidopsis thaliana]	895	617	1864	22	469	475	2e-48	30.98	47.44
Locus_26297_Transcript_1/1_Confidence_1.000	414	atha|NP_199705 | OG5_127136 | leucine-rich repeat transmembrane protein kinase, putative [Arabidopsis thaliana]	1135	362	147	104	174	135	4e-08	44.44	65.28
Locus_14681_Transcript_1/1_Confidence_1.000	1190	atha|NP_199754 | OG5_129383 | transducin family protein / WD-40 repeat family protein [Arabidopsis thaliana]	1677	1152	259	1373	1668	757	4e-87	46.82	65.89
Locus_10656_Transcript_1/1_Confidence_1.000	1846	atha|NP_199758 | OG5_140131 | protein kinase family protein [Arabidopsis thaliana]	483	172	1305	76	461	1159	3e-150	58.82	73.4
Locus_3013_Transcript_1/1_Confidence_1.000	1015	atha|NP_199763 | OG5_132609 | WRKY48; transcription factor [Arabidopsis thaliana]	399	1015	845	241	297	135	4e-07	49.12	59.65
Locus_64585_Transcript_1/1_Confidence_1.000	503	atha|NP_199777 | OG5_127136 | leucine-rich repeat transmembrane protein kinase, putative [Arabidopsis thaliana]	966	501	4	239	405	212	1e-17	40.23	53.45
Locus_3492_Transcript_1/1_Confidence_1.000	1830	atha|NP_199783 | OG5_144944 | ATGH9A1 (ARABIDOPSIS THALIANA GLYCOSYL HYDROLASE 9A1); cellulase/ hydrolase, hydrolyzing O-glycosyl compounds [Arabidopsis thaliana]	621	3	524	429	603	482	3e-50	61.14	74.29
Locus_27610_Transcript_1/1_Confidence_1.000	956	atha|NP_199784 | OG5_136986 | ATFRO6 (FERRIC REDUCTION OXIDASE 6); ferric-chelate reductase/ oxidoreductase [Arabidopsis thaliana]	738	869	120	38	284	301	5e-28	30.56	53.97
Locus_37792_Transcript_1/1_Confidence_1.000	587	atha|NP_199785 | OG5_136986 | ATFRO7 (FERRIC REDUCTION OXIDASE 7); ferric-chelate reductase/ oxidoreductase [Arabidopsis thaliana]	747	553	5	104	284	271	3e-25	31.15	56.28
Locus_38131_Transcript_1/1_Confidence_1.000	303	atha|NP_199785 | OG5_136986 | ATFRO7 (FERRIC REDUCTION OXIDASE 7); ferric-chelate reductase/ oxidoreductase [Arabidopsis thaliana]	747	300	28	329	419	267	4e-26	51.65	72.53
Locus_46197_Transcript_1/1_Confidence_1.000	273	atha|NP_199788 | OG5_139150 | leucine-rich repeat transmembrane protein kinase, putative [Arabidopsis thaliana]	946	273	1	210	301	169	7e-13	41.3	57.61
Locus_30452_Transcript_1/1_Confidence_1.000	1512	atha|NP_199910 | OG5_170742 | WD-40 repeat family protein [Arabidopsis thaliana]	512	1001	1510	165	335	452	2e-47	50.58	63.95
Locus_36158_Transcript_1/1_Confidence_1.000	1214	atha|NP_199910 | OG5_170742 | WD-40 repeat family protein [Arabidopsis thaliana]	512	2	571	319	511	651	5e-77	60.62	77.2
Locus_18219_Transcript_1/1_Confidence_1.000	342	atha|NP_199933 | OG5_130869 | unknown protein [Arabidopsis thaliana]	1838	10	285	337	426	212	3e-18	45.65	65.22
Locus_802_Transcript_1/1_Confidence_1.000	2385	atha|NP_199995 | OG5_127226 | PGM (PHOSPHOGLUCOMUTASE); phosphoglucomutase [Arabidopsis thaliana]	623	2164	491	65	623	2417	0	78.89	90.88
Locus_37704_Transcript_1/1_Confidence_1.000	277	atha|NP_200002 | OG5_212903 | peroxidase [Arabidopsis thaliana]	322	246	1	213	297	187	4e-16	46.51	62.79
Locus_15446_Transcript_1/1_Confidence_1.000	2314	atha|NP_200058 | OG5_126647 | MATE efflux protein-related [Arabidopsis thaliana]	486	2016	622	21	485	849	3e-102	44.3	65.16
Locus_24898_Transcript_1/1_Confidence_1.000	1185	atha|NP_200071 | OG5_127637 | RAB GTPase activator [Arabidopsis thaliana]	673	130	1017	7	273	610	1e-69	46.89	61.64
Locus_21919_Transcript_1/1_Confidence_1.000	653	atha|NP_200093 | OG5_128502 | ornithine cyclodeaminase/mu-crystallin family protein [Arabidopsis thaliana]	325	653	462	257	320	163	1e-11	45.31	68.75
Locus_11155_Transcript_1/1_Confidence_1.000	811	atha|NP_200108 | OG5_170746 | unknown protein [Arabidopsis thaliana]	170	461	748	75	170	443	6e-52	79.17	92.71
Locus_68254_Transcript_1/1_Confidence_1.000	1829	atha|NP_200128 | OG5_139569 | unknown protein [Arabidopsis thaliana]	188	857	1342	15	175	328	6e-33	39.51	60.49
Locus_8039_Transcript_1/1_Confidence_1.000	534	atha|NP_200227 | OG5_129696 | ATOMT1 (O-METHYLTRANSFERASE 1); caffeate O-methyltransferase/ myricetin 3-O-methyltransferase/ quercetin 3-O-methyltransferase [Arabidopsis thaliana]	363	2	529	159	334	525	3e-63	53.98	69.32
Locus_12905_Transcript_1/1_Confidence_1.000	328	atha|NP_200227 | OG5_129696 | ATOMT1 (O-METHYLTRANSFERASE 1); caffeate O-methyltransferase/ myricetin 3-O-methyltransferase/ quercetin 3-O-methyltransferase [Arabidopsis thaliana]	363	9	323	110	213	257	2e-25	48.57	67.62
Locus_20199_Transcript_1/1_Confidence_1.000	325	atha|NP_200227 | OG5_129696 | ATOMT1 (O-METHYLTRANSFERASE 1); caffeate O-methyltransferase/ myricetin 3-O-methyltransferase/ quercetin 3-O-methyltransferase [Arabidopsis thaliana]	363	317	3	110	213	259	8e-26	48.57	65.71
Locus_22127_Transcript_1/2_Confidence_1.000	357	atha|NP_200227 | OG5_129696 | ATOMT1 (O-METHYLTRANSFERASE 1); caffeate O-methyltransferase/ myricetin 3-O-methyltransferase/ quercetin 3-O-methyltransferase [Arabidopsis thaliana]	363	356	6	199	315	377	3e-42	58.12	75.21
Locus_54314_Transcript_1/1_Confidence_1.000	446	atha|NP_200227 | OG5_129696 | ATOMT1 (O-METHYLTRANSFERASE 1); caffeate O-methyltransferase/ myricetin 3-O-methyltransferase/ quercetin 3-O-methyltransferase [Arabidopsis thaliana]	363	436	2	60	202	178	5e-14	31.29	47.62
Locus_33671_Transcript_1/1_Confidence_1.000	561	atha|NP_200237 | OG5_127969 | MRE11 (meiotic recombination 11); endonuclease/ exonuclease/ hydrolase/ manganese ion binding / protein serine/threonine phosphatase [Arabidopsis thaliana]	720	1	561	180	366	779	4e-97	72.73	86.1
Locus_50671_Transcript_1/1_Confidence_1.000	602	atha|NP_200248 | OG5_190446 | late embryogenesis abundant protein-related / LEA protein-related [Arabidopsis thaliana]	337	3	572	132	317	432	2e-49	38.95	63.68
Locus_35783_Transcript_1/1_Confidence_1.000	2499	atha|NP_200251 | OG5_163454 | methyltransferase [Arabidopsis thaliana]	292	770	1624	3	276	578	2e-65	46.67	62.81
Locus_6774_Transcript_1/1_Confidence_1.000	490	atha|NP_200288 | OG5_131050 | THI1; protein homodimerization [Arabidopsis thaliana]	349	2	436	179	318	522	4e-63	66.21	82.76
Locus_29634_Transcript_1/1_Confidence_1.000	266	atha|NP_200288 | OG5_131050 | THI1; protein homodimerization [Arabidopsis thaliana]	349	14	262	57	139	335	8e-37	71.08	84.34
Locus_23747_Transcript_1/1_Confidence_1.000	986	atha|NP_200295 | OG5_132753 | SGP1; GTP binding [Arabidopsis thaliana]	288	986	822	232	286	215	5e-18	72.73	85.45
Locus_54361_Transcript_1/1_Confidence_1.000	649	atha|NP_200307 | OG5_129158 | PDC2 (pyruvate decarboxylase-2); carboxy-lyase/ catalytic/ magnesium ion binding / pyruvate decarboxylase/ thiamin pyrophosphate binding [Arabidopsis thaliana]	607	180	1	41	100	184	7e-14	75	85
Locus_63005_Transcript_1/1_Confidence_1.000	1112	atha|NP_200320 | OG5_136220 | MAPKKK15; ATP binding / kinase/ protein kinase/ protein serine/threonine kinase [Arabidopsis thaliana]	448	858	1112	25	102	146	2e-08	41.18	57.65
Locus_254_Transcript_1/1_Confidence_1.000	1845	atha|NP_200350 | OG5_178127 | EDM2; transcription factor [Arabidopsis thaliana]	1297	1779	994	645	903	779	5e-88	52.67	69.47
Locus_4068_Transcript_1/1_Confidence_1.000	938	atha|NP_200365 | OG5_178128 | TRN1 (TORNADO 1) [Arabidopsis thaliana]	1380	10	936	633	930	212	9e-17	23.12	46.25
Locus_15447_Transcript_1/1_Confidence_1.000	583	atha|NP_200365 | OG5_178128 | TRN1 (TORNADO 1) [Arabidopsis thaliana]	1380	551	3	492	682	186	4e-14	31.66	48.24
Locus_20402_Transcript_1/1_Confidence_1.000	834	atha|NP_200365 | OG5_178128 | TRN1 (TORNADO 1) [Arabidopsis thaliana]	1380	2	826	498	780	269	7e-24	30.72	51.88
Locus_20981_Transcript_1/1_Confidence_1.000	581	atha|NP_200365 | OG5_178128 | TRN1 (TORNADO 1) [Arabidopsis thaliana]	1380	575	39	510	695	209	6e-17	30.37	48.17
Locus_21160_Transcript_1/1_Confidence_1.000	800	atha|NP_200365 | OG5_178128 | TRN1 (TORNADO 1) [Arabidopsis thaliana]	1380	47	703	612	820	197	4e-15	28.32	47.79
Locus_21462_Transcript_1/1_Confidence_1.000	436	atha|NP_200365 | OG5_178128 | TRN1 (TORNADO 1) [Arabidopsis thaliana]	1380	432	1	602	743	160	4e-11	28.38	53.38
Locus_21477_Transcript_1/1_Confidence_1.000	1063	atha|NP_200365 | OG5_178128 | TRN1 (TORNADO 1) [Arabidopsis thaliana]	1380	8	1063	586	929	259	3e-22	27.03	43.51
Locus_23450_Transcript_1/1_Confidence_1.000	538	atha|NP_200365 | OG5_178128 | TRN1 (TORNADO 1) [Arabidopsis thaliana]	1380	2	532	681	846	127	6e-07	26.11	46.67
Locus_30928_Transcript_1/1_Confidence_1.000	609	atha|NP_200365 | OG5_178128 | TRN1 (TORNADO 1) [Arabidopsis thaliana]	1380	592	2	634	819	175	1e-12	26.73	46.04
Locus_33686_Transcript_1/1_Confidence_1.000	372	atha|NP_200365 | OG5_178128 | TRN1 (TORNADO 1) [Arabidopsis thaliana]	1380	336	7	610	720	123	1e-06	32.46	51.75
Locus_58004_Transcript_1/1_Confidence_1.000	1639	atha|NP_200365 | OG5_178128 | TRN1 (TORNADO 1) [Arabidopsis thaliana]	1380	1629	118	808	1291	245	1e-19	22.67	40.57
Locus_34267_Transcript_1/1_Confidence_1.000	1167	atha|NP_200368 | OG5_160333 | unknown protein [Arabidopsis thaliana]	143	590	886	51	143	296	7e-30	57.58	68.69
Locus_21805_Transcript_1/1_Confidence_1.000	307	atha|NP_200394 | OG5_190728 | lectin protein kinase, putative [Arabidopsis thaliana]	681	1	303	565	665	238	4e-22	48.54	63.11
Locus_23239_Transcript_1/1_Confidence_1.000	2234	atha|NP_200394 | OG5_190728 | lectin protein kinase, putative [Arabidopsis thaliana]	681	216	1997	27	642	1013	4e-124	38.92	57.12
Locus_353_Transcript_1/1_Confidence_1.000	1783	atha|NP_200411 | OG5_126623 | heat shock protein 81-4 (HSP81-4) [Arabidopsis thaliana]	699	63	1397	255	699	1910	0	84.49	94.61
Locus_8434_Transcript_1/1_Confidence_1.000	1003	atha|NP_200412 | OG5_126623 | HSP81-3; ATP binding / unfolded protein binding [Arabidopsis thaliana]	699	312	938	2	210	945	1e-119	90.91	97.13
Locus_5459_Transcript_1/1_Confidence_1.000	482	atha|NP_200424 | OG5_129734 | transducin family protein / WD-40 repeat family protein [Arabidopsis thaliana]	315	391	480	3	32	116	9e-06	70	80
Locus_13663_Transcript_1/1_Confidence_1.000	377	atha|NP_200428 | OG5_153287 | unknown protein [Arabidopsis thaliana]	168	377	198	65	125	141	6e-10	44.26	55.74
Locus_14820_Transcript_1/1_Confidence_1.000	510	atha|NP_200428 | OG5_153287 | unknown protein [Arabidopsis thaliana]	168	3	308	49	141	126	2e-07	32.35	47.06
Locus_455_Transcript_1/1_Confidence_1.000	1187	atha|NP_200441 | OG5_170223 | GAMT2 (GIBBERELLIC ACID METHYLTRANSFERASE 2); S-adenosylmethionine-dependent methyltransferase/ gibberellin carboxyl-O-methyltransferase [Arabidopsis thaliana]	387	580	2	20	208	416	3e-44	41.84	59.69
Locus_863_Transcript_1/1_Confidence_1.000	2020	atha|NP_200441 | OG5_170223 | GAMT2 (GIBBERELLIC ACID METHYLTRANSFERASE 2); S-adenosylmethionine-dependent methyltransferase/ gibberellin carboxyl-O-methyltransferase [Arabidopsis thaliana]	387	1641	577	17	368	554	1e-61	35.77	56.37
Locus_12762_Transcript_1/1_Confidence_1.000	1064	atha|NP_200441 | OG5_170223 | GAMT2 (GIBBERELLIC ACID METHYLTRANSFERASE 2); S-adenosylmethionine-dependent methyltransferase/ gibberellin carboxyl-O-methyltransferase [Arabidopsis thaliana]	387	3	494	194	359	215	2e-17	31.98	54.07
Locus_16314_Transcript_1/1_Confidence_1.000	856	atha|NP_200441 | OG5_170223 | GAMT2 (GIBBERELLIC ACID METHYLTRANSFERASE 2); S-adenosylmethionine-dependent methyltransferase/ gibberellin carboxyl-O-methyltransferase [Arabidopsis thaliana]	387	356	856	9	171	315	3e-31	40.12	58.08
Locus_41825_Transcript_1/1_Confidence_1.000	816	atha|NP_200441 | OG5_170223 | GAMT2 (GIBBERELLIC ACID METHYLTRANSFERASE 2); S-adenosylmethionine-dependent methyltransferase/ gibberellin carboxyl-O-methyltransferase [Arabidopsis thaliana]	387	806	159	79	290	399	3e-43	38.57	56.5
Locus_37967_Transcript_1/1_Confidence_1.000	720	atha|NP_200477 | OG5_127543 | ILL2; IAA-Ala conjugate hydrolase/ IAA-amino acid conjugate hydrolase/ metallopeptidase [Arabidopsis thaliana]	439	397	11	30	158	379	2e-40	52.71	70.54
Locus_10879_Transcript_1/1_Confidence_1.000	419	atha|NP_200514 | OG5_138093 | lactoylglutathione lyase family protein / glyoxalase I family protein [Arabidopsis thaliana]	197	65	418	69	188	519	4e-65	75.83	85.83
Locus_56896_Transcript_1/1_Confidence_1.000	1851	atha|NP_200554 | OG5_131019 | XRCC3; ATP binding / damaged DNA binding / protein binding / single-stranded DNA binding [Arabidopsis thaliana]	304	1828	878	10	299	572	1e-65	39.47	55.56
Locus_29035_Transcript_1/1_Confidence_1.000	804	atha|NP_200567 | OG5_134490 | BIO1 (biotin auxotroph 1); adenosylmethionine-8-amino-7-oxononanoate transaminase [Arabidopsis thaliana]	833	802	2	513	777	852	2e-105	59.26	71.48
Locus_2788_Transcript_1/1_Confidence_1.000	2209	atha|NP_200618 | OG5_156587 | unknown protein [Arabidopsis thaliana]	945	2	1918	320	945	1587	0	47.82	68.85
Locus_3950_Transcript_1/1_Confidence_1.000	1414	atha|NP_200652 | OG5_150345 | SNX2a (SORTING NEXIN 2a); phosphoinositide binding [Arabidopsis thaliana]	587	1413	799	374	578	720	1e-85	65.37	80.98
Locus_11295_Transcript_1/1_Confidence_1.000	1692	atha|NP_200653 | OG5_129321 | binding [Arabidopsis thaliana]	1065	1087	275	59	335	722	2e-81	58.12	72.56
Locus_55177_Transcript_1/1_Confidence_1.000	1214	atha|NP_200669 | OG5_212934 | PHD finger transcription factor, putative [Arabidopsis thaliana]	1065	1100	885	110	172	137	5e-07	41.67	52.78
Locus_15999_Transcript_1/1_Confidence_1.000	1242	atha|NP_200749 | OG5_130486 | unknown protein [Arabidopsis thaliana]	130	600	974	1	125	413	2e-46	59.2	76.8
Locus_24766_Transcript_1/1_Confidence_1.000	469	atha|NP_200769 | OG5_153059 | DNAJ heat shock N-terminal domain-containing protein [Arabidopsis thaliana]	268	6	302	181	267	190	5e-16	47	63
Locus_20797_Transcript_1/1_Confidence_1.000	1833	atha|NP_200824 | OG5_128020 | aspartyl aminopeptidase, putative [Arabidopsis thaliana]	477	716	1831	2	372	1209	7e-158	60.32	77.25
Locus_16889_Transcript_1/1_Confidence_1.000	463	atha|NP_200860 | OG5_190748 | late embryogenesis abundant protein-related / LEA protein-related [Arabidopsis thaliana]	338	120	461	49	163	397	6e-45	63.48	73.04
Locus_3354_Transcript_1/1_Confidence_1.000	466	atha|NP_200894 | OG5_126971 | AtRABA1f (Arabidopsis Rab GTPase homolog A1f); GTP binding [Arabidopsis thaliana]	217	2	466	63	216	701	5e-92	80.65	94.19
Locus_31455_Transcript_1/1_Confidence_1.000	466	atha|NP_200894 | OG5_126971 | AtRABA1f (Arabidopsis Rab GTPase homolog A1f); GTP binding [Arabidopsis thaliana]	217	465	1	63	216	698	1e-91	80.65	93.55
Locus_27024_Transcript_1/1_Confidence_1.000	1088	atha|NP_200908 | OG5_127539 | replication protein, putative [Arabidopsis thaliana]	629	833	12	6	279	623	2e-72	49.31	65.86
Locus_1688_Transcript_1/1_Confidence_1.000	2393	atha|NP_200929 | OG5_131016 | SNAP33 (SOLUBLE N-ETHYLMALEIMIDE-SENSITIVE FACTOR ADAPTOR PROTEIN 33); SNAP receptor/ protein binding [Arabidopsis thaliana]	300	1274	624	82	298	523	9e-58	48.62	68.81
Locus_7529_Transcript_1/1_Confidence_1.000	1290	atha|NP_200946 | OG5_170758 | TOC1 (TIMING OF CAB EXPRESSION 1); transcription regulator/ two-component response regulator [Arabidopsis thaliana]	618	265	2	9	98	229	2e-18	50	73.33
Locus_3166_Transcript_1/1_Confidence_1.000	1098	atha|NP_200959 | OG5_128594 | NADP-dependent oxidoreductase, putative [Arabidopsis thaliana]	406	2	682	179	405	741	4e-92	65.64	78.85
Locus_6440_Transcript_1/1_Confidence_1.000	297	atha|NP_200990 | OG5_160336 | unknown protein [Arabidopsis thaliana]	475	247	26	32	105	181	1e-14	42.67	68
Locus_28120_Transcript_1/1_Confidence_1.000	773	atha|NP_201024 | OG5_175781 | AtCXE20 (Arabidopsis thaliana carboxyesterase 20); carboxylesterase	327	546	4	15	171	285	1e-27	31.22	52.91
Locus_9926_Transcript_1/1_Confidence_1.000	1477	atha|NP_201073 | OG5_127253 | AHA11 (Arabidopsis H(+)-ATPase 11); ATPase [Arabidopsis thaliana]	956	1	1476	219	710	2245	0	89.63	94.72
Locus_40381_Transcript_1/1_Confidence_1.000	260	atha|NP_201073 | OG5_127253 | AHA11 (Arabidopsis H(+)-ATPase 11); ATPase [Arabidopsis thaliana]	956	3	260	857	948	298	2e-30	64.13	79.35
Locus_8630_Transcript_1/1_Confidence_0.667	294	atha|NP_201080 | OG5_133292 | band 7 family protein [Arabidopsis thaliana]	286	292	122	120	175	212	1e-19	78.95	84.21
Locus_25897_Transcript_1/1_Confidence_1.000	973	atha|NP_201090 | OG5_150374 | phosphoglycerate/bisphosphoglycerate mutase family protein [Arabidopsis thaliana]	297	326	6	51	157	363	3e-38	61.68	79.44
Locus_1169_Transcript_1/1_Confidence_1.000	990	atha|NP_201098 | OG5_128665 | GDSL-motif lipase/hydrolase family protein [Arabidopsis thaliana]	242	3	512	71	237	458	1e-52	51.46	69.59
Locus_31365_Transcript_1/1_Confidence_1.000	376	atha|NP_201098 | OG5_128665 | GDSL-motif lipase/hydrolase family protein [Arabidopsis thaliana]	242	174	1	2	59	227	2e-21	62.07	89.66
Locus_22562_Transcript_1/1_Confidence_1.000	1626	atha|NP_201125 | OG5_178149 | tetratricopeptide repeat (TPR)-containing protein [Arabidopsis thaliana]	649	1	1164	249	636	998	6e-125	51.29	73.71
Locus_22994_Transcript_1/1_Confidence_1.000	2029	atha|NP_201125 | OG5_178149 | tetratricopeptide repeat (TPR)-containing protein [Arabidopsis thaliana]	649	1334	2020	27	245	261	1e-21	40	59.57
Locus_36327_Transcript_1/1_Confidence_1.000	359	atha|NP_201150 | OG5_160246 | CYP94B1; electron carrier/ heme binding / iron ion binding / monooxygenase/ oxygen binding [Arabidopsis thaliana]	510	25	153	436	475	168	1e-12	67.44	88.37
Locus_13254_Transcript_1/1_Confidence_1.000	304	atha|NP_201151 | OG5_150375 | SAP domain-containing protein [Arabidopsis thaliana]	162	3	224	39	110	198	3e-18	56.76	68.92
Locus_10209_Transcript_1/1_Confidence_1.000	832	atha|NP_201165 | OG5_150212 | FLS5 (FLAVONOL SYNTHASE 5); flavonol synthase [Arabidopsis thaliana]	325	397	5	33	153	200	3e-16	35.61	53.79
Locus_37992_Transcript_1/1_Confidence_1.000	468	atha|NP_201196 | OG5_130625 | FCLY (FARNESYLCYSTEINE LYASE); prenylcysteine oxidase [Arabidopsis thaliana]	500	2	466	275	429	435	3e-49	50.97	69.03
Locus_15146_Transcript_1/1_Confidence_1.000	1677	atha|NP_201197 | OG5_126736 | DNA topoisomerase III alpha, putative [Arabidopsis thaliana]	926	3	1034	516	848	986	6e-120	55.46	66.95
Locus_23741_Transcript_1/1_Confidence_1.000	800	atha|NP_201198 | OG5_127136 | leucine-rich repeat transmembrane protein kinase, putative [Arabidopsis thaliana]	1102	258	794	26	203	278	3e-25	41.34	63.13
Locus_4729_Transcript_1/1_Confidence_1.000	1613	atha|NP_201217 | OG5_178088 | peroxidase, putative [Arabidopsis thaliana]	328	243	1082	43	328	714	7e-87	51.05	68.53
Locus_31099_Transcript_1/1_Confidence_1.000	778	atha|NP_201217 | OG5_178088 | peroxidase, putative [Arabidopsis thaliana]	328	476	3	5	155	365	5e-39	50.63	68.35
Locus_24642_Transcript_1/1_Confidence_1.000	339	atha|NP_201233 | OG5_147277 | DiT2.2 (dicarboxylate transporter 2.2); oxoglutarate:malate antiporter [Arabidopsis thaliana]	549	217	2	79	150	208	5e-18	70.83	81.94
Locus_3944_Transcript_1/1_Confidence_1.000	2529	atha|NP_201234 | OG5_147277 | DIT2.1 (DICARBOXYLATE TRANSPORT 2.1); oxoglutarate:malate antiporter [Arabidopsis thaliana]	563	683	2098	92	563	1674	0	75.42	88.56
Locus_30890_Transcript_1/1_Confidence_1.000	1420	atha|NP_201234 | OG5_147277 | DIT2.1 (DICARBOXYLATE TRANSPORT 2.1); oxoglutarate:malate antiporter [Arabidopsis thaliana]	563	1418	183	152	563	1414	0	69.42	82.77
Locus_13697_Transcript_1/1_Confidence_1.000	1015	atha|NP_201235 | OG5_127275 | ATGCH; 3,4-dihydroxy-2-butanone-4-phosphate synthase/ GTP cyclohydrolase II [Arabidopsis thaliana]	543	1013	495	353	525	782	6e-97	83.24	94.22
Locus_13980_Transcript_1/1_Confidence_1.000	1609	atha|NP_201243 | OG5_164657 | fructose-1,6-bisphosphatase family protein [Arabidopsis thaliana]	404	1257	268	73	404	1179	2e-155	68.75	79.17
Locus_9603_Transcript_1/1_Confidence_1.000	2228	atha|NP_201299 | OG5_141142 | ATATH13; transporter [Arabidopsis thaliana]	761	1357	2	79	534	1771	0	76.47	84.53
Locus_7589_Transcript_1/1_Confidence_1.000	2265	atha|NP_201302 | OG5_153388 | mitochondrial substrate carrier family protein [Arabidopsis thaliana]	428	1375	2265	128	419	985	3e-123	65.55	79.93
Locus_5036_Transcript_1/1_Confidence_1.000	4811	atha|NP_201349 | OG5_156360 | kinesin motor protein-related [Arabidopsis thaliana]	1281	4110	613	28	1270	2450	0	46.35	63.22
Locus_16055_Transcript_1/1_Confidence_1.000	353	atha|NP_201377 | OG5_130246 | serine carboxypeptidase S28 family protein [Arabidopsis thaliana]	515	4	351	86	201	479	5e-56	73.28	87.07
Locus_52975_Transcript_1/1_Confidence_1.000	356	atha|NP_201377 | OG5_130246 | serine carboxypeptidase S28 family protein [Arabidopsis thaliana]	515	59	238	104	163	209	6e-30	61.67	83.33
Locus_9712_Transcript_1/1_Confidence_1.000	1342	atha|NP_201409 | OG5_134765 | protein phosphatase 2C family protein / PP2C family protein [Arabidopsis thaliana]	385	2	238	310	385	254	4e-22	66.67	76.54
Locus_53706_Transcript_1/1_Confidence_1.000	588	atha|NP_201416 | OG5_129192 | glycosyl hydrolase family 38 protein [Arabidopsis thaliana]	1047	113	544	444	591	304	2e-29	45.27	63.51
Locus_5344_Transcript_1/1_Confidence_1.000	1651	atha|NP_201421 | OG5_141677 | ARO2 (ARMADILLO REPEAT ONLY 2); binding [Arabidopsis thaliana]	651	5	1405	193	641	758	2e-89	43.1	56.07
Locus_47591_Transcript_1/2_Confidence_1.000	205	atha|NP_201456 | OG5_132354 | Maf family protein [Arabidopsis thaliana]	207	1	201	36	102	136	8e-10	62.69	74.63
Locus_30405_Transcript_1/1_Confidence_1.000	953	atha|NP_201470 | OG5_164464 | UGT72E2; UDP-glycosyltransferase/ coniferyl-alcohol glucosyltransferase/ transferase, transferring glycosyl groups [Arabidopsis thaliana]	481	950	3	16	302	231	2e-19	29.38	49.38
Locus_39450_Transcript_1/1_Confidence_1.000	1122	atha|NP_201476 | OG5_129984 | CHR1 (CHROMATIN REMODELING 1); ATPase/ helicase [Arabidopsis thaliana]	764	855	1079	76	153	166	1e-10	48.72	64.1
Locus_29226_Transcript_1/1_Confidence_1.000	2358	atha|NP_201480 | no_group | protein kinase family protein [Arabidopsis thaliana]	622	721	1626	293	594	751	3e-86	45.07	67.11
Locus_48162_Transcript_1/1_Confidence_1.000	521	atha|NP_201480 | no_group | protein kinase family protein [Arabidopsis thaliana]	622	472	2	297	447	280	6e-27	41.25	60
Locus_22392_Transcript_1/1_Confidence_1.000	902	atha|NP_201485 | OG5_178159 | SAP domain-containing protein [Arabidopsis thaliana]	551	246	1	79	161	214	3e-17	46.99	68.67
Locus_1630_Transcript_1/1_Confidence_1.000	1741	atha|NP_201508 | OG5_170772 | RALFL34 (ralf-like 34); signal transducer [Arabidopsis thaliana]	129	1226	1008	55	129	211	1e-17	54.67	69.33
Locus_5139_Transcript_1/1_Confidence_1.000	1944	atha|NP_201508 | OG5_170772 | RALFL34 (ralf-like 34); signal transducer [Arabidopsis thaliana]	129	938	1087	80	129	188	2e-14	72	80
Locus_33518_Transcript_1/1_Confidence_1.000	779	atha|NP_201508 | OG5_170772 | RALFL34 (ralf-like 34); signal transducer [Arabidopsis thaliana]	129	183	34	80	129	200	2e-17	74	82
Locus_2161_Transcript_1/1_Confidence_1.000	4105	atha|NP_563660 | OG5_140482 | lipase class 3 family protein [Arabidopsis thaliana]	713	2092	806	320	709	994	9e-116	52.19	67.67
Locus_791_Transcript_1/1_Confidence_1.000	616	atha|NP_563677 | OG5_128089 | GCN5-related N-acetyltransferase (GNAT) family protein [Arabidopsis thaliana]	174	138	614	1	159	754	9e-100	84.91	93.71
Locus_12088_Transcript_1/1_Confidence_1.000	564	atha|NP_563677 | OG5_128089 | GCN5-related N-acetyltransferase (GNAT) family protein [Arabidopsis thaliana]	174	2	91	145	174	132	4e-08	80	96.67
Locus_44948_Transcript_1/1_Confidence_1.000	1329	atha|NP_563696 | OG5_133191 | VPS2.3 (VACUOLAR PROTEIN SORTING-ASSOCIATED PROTEIN 2.3) [Arabidopsis thaliana]	210	697	1329	1	210	668	7e-83	79.62	91.47
Locus_37217_Transcript_1/1_Confidence_1.000	1210	atha|NP_563702 | OG5_128797 | tetratricopeptide repeat (TPR)-containing protein [Arabidopsis thaliana]	360	1	747	107	359	509	7e-58	39.92	60.87
Locus_7071_Transcript_1/1_Confidence_1.000	551	atha|NP_563710 | OG5_138762 | AWPM-19-like membrane family protein [Arabidopsis thaliana]	186	262	549	1	100	228	3e-21	49	66
Locus_8349_Transcript_1/1_Confidence_1.000	784	atha|NP_563710 | OG5_138762 | AWPM-19-like membrane family protein [Arabidopsis thaliana]	186	340	17	1	113	248	2e-23	48.67	65.49
Locus_70977_Transcript_1/1_Confidence_1.000	891	atha|NP_563710 | OG5_138762 | AWPM-19-like membrane family protein [Arabidopsis thaliana]	186	656	351	30	136	227	2e-20	46.73	67.29
Locus_9798_Transcript_1/1_Confidence_1.000	1136	atha|NP_563719 | OG5_131871 | UBP2 (UBIQUITIN-SPECIFIC PROTEASE 2); ubiquitin-specific protease [Arabidopsis thaliana]	961	788	1102	658	737	136	6e-07	35.24	48.57
Locus_52603_Transcript_1/1_Confidence_1.000	305	atha|NP_563721 | OG5_132046 | unknown protein [Arabidopsis thaliana]	442	2	118	399	437	134	2e-08	58.97	76.92
Locus_56362_Transcript_1/1_Confidence_1.000	310	atha|NP_563721 | OG5_132046 | unknown protein [Arabidopsis thaliana]	442	112	309	42	107	218	8e-20	60.61	77.27
Locus_3802_Transcript_1/1_Confidence_1.000	1080	atha|NP_563770 | OG5_135129 | aldo/keto reductase family protein [Arabidopsis thaliana]	377	1080	469	175	377	782	1e-98	69.12	85.29
Locus_30802_Transcript_1/1_Confidence_1.000	855	atha|NP_563770 | OG5_135129 | aldo/keto reductase family protein [Arabidopsis thaliana]	377	392	3	26	154	302	2e-29	54.96	70.23
Locus_20381_Transcript_1/1_Confidence_1.000	385	atha|NP_563772 | OG5_170781 | lipase class 3 family protein [Arabidopsis thaliana]	444	365	3	205	323	277	9e-28	49.59	65.04
Locus_41057_Transcript_1/1_Confidence_1.000	772	atha|NP_563840 | OG5_129519 | unknown protein [Arabidopsis thaliana]	581	353	769	5	143	391	3e-41	53.96	69.06
Locus_25077_Transcript_1/1_Confidence_1.000	520	atha|NP_563854 | OG5_132598 | POLD4 (POLYMERASE DELTA 4); DNA-directed DNA polymerase [Arabidopsis thaliana]	124	400	14	2	124	284	3e-30	44.96	60.47
Locus_17371_Transcript_1/1_Confidence_1.000	649	atha|NP_563858 | OG5_131622 | ERG28 (Arabidopsis homolog of yeast ergosterol28) [Arabidopsis thaliana]	129	487	648	1	54	228	1e-21	77.78	92.59
Locus_20373_Transcript_1/1_Confidence_1.000	804	atha|NP_563858 | OG5_131622 | ERG28 (Arabidopsis homolog of yeast ergosterol28) [Arabidopsis thaliana]	129	802	551	40	123	257	3e-25	66.67	79.76
Locus_9729_Transcript_1/1_Confidence_1.000	704	atha|NP_563892 | OG5_213008 | xyloglucan:xyloglucosyl transferase, putative / xyloglucan endotransglycosylase, putative / endo-xyloglucan transferase, putative [Arabidopsis thaliana]	305	408	704	9	102	187	8e-15	44.44	62.63
Locus_30907_Transcript_1/1_Confidence_1.000	482	atha|NP_563894 | OG5_131766 | endonuclease/exonuclease/phosphatase family protein [Arabidopsis thaliana]	441	7	243	360	439	244	1e-22	56.25	76.25
Locus_69630_Transcript_1/1_Confidence_1.000	483	atha|NP_563913 | OG5_190803 | unknown protein [Arabidopsis thaliana]	250	465	7	26	182	198	5e-17	29.94	52.87
Locus_7101_Transcript_1/1_Confidence_1.000	1016	atha|NP_563947 | OG5_145006 | oxidoreductase [Arabidopsis thaliana]	196	283	699	67	196	474	2e-55	66.19	76.26
Locus_9837_Transcript_1/1_Confidence_1.000	1664	atha|NP_563949 | OG5_127044 | UTR3 (UDP-GALACTOSE TRANSPORTER 3); pyrimidine nucleotide sugar transmembrane transporter [Arabidopsis thaliana]	331	531	1478	5	321	1151	4e-152	71.92	84.54
Locus_28720_Transcript_1/1_Confidence_1.000	707	atha|NP_563971 | OG5_153393 | MBD10; DNA binding / methyl-CpG binding [Arabidopsis thaliana]	384	68	352	11	105	297	3e-29	49.47	75.79
Locus_29121_Transcript_1/1_Confidence_1.000	379	atha|NP_563985 | OG5_163386 | GOS11 (golgi snare 11); SNARE binding [Arabidopsis thaliana]	223	371	222	174	223	164	7e-13	62	80
Locus_18631_Transcript_1/1_Confidence_1.000	1989	atha|NP_563993 | OG5_128417 | unknown protein [Arabidopsis thaliana]	234	441	1112	1	226	437	3e-47	64.16	80.97
Locus_30409_Transcript_1/1_Confidence_1.000	1397	atha|NP_564012 | OG5_129086 | KU70 (ARABIDOPSIS THALIANA KU70 HOMOLOG); double-stranded DNA binding / protein binding [Arabidopsis thaliana]	621	83	1339	26	451	1097	4e-141	48.83	70.33
Locus_45180_Transcript_1/1_Confidence_1.000	287	atha|NP_564012 | OG5_129086 | KU70 (ARABIDOPSIS THALIANA KU70 HOMOLOG); double-stranded DNA binding / protein binding [Arabidopsis thaliana]	621	146	3	466	513	167	1e-12	64.58	85.42
Locus_9703_Transcript_1/1_Confidence_1.000	679	atha|NP_564017 | OG5_190810 | integral membrane family protein [Arabidopsis thaliana]	204	5	349	75	187	209	4e-18	36.52	58.26
Locus_25823_Transcript_1/1_Confidence_1.000	523	atha|NP_564021 | OG5_127482 | LOX3; electron carrier/ iron ion binding / lipoxygenase/ metal ion binding / oxidoreductase, acting on single donors with incorporation of molecular oxygen, incorporation of two atoms of oxygen [Arabidopsis thaliana]	919	4	507	132	298	537	7e-62	55.95	77.38
Locus_40316_Transcript_1/1_Confidence_1.000	1550	atha|NP_564021 | OG5_127482 | LOX3; electron carrier/ iron ion binding / lipoxygenase/ metal ion binding / oxidoreductase, acting on single donors with incorporation of molecular oxygen, incorporation of two atoms of oxygen [Arabidopsis thaliana]	919	183	1	86	146	132	4e-06	39.34	65.57
Locus_5119_Transcript_1/1_Confidence_1.000	2579	atha|NP_564039 | OG5_129519 | unknown protein [Arabidopsis thaliana]	446	734	1831	85	439	1108	5e-140	54.32	72.43
Locus_60608_Transcript_1/1_Confidence_1.000	262	atha|NP_564053 | OG5_130954 | calcineurin-like phosphoesterase family protein [Arabidopsis thaliana]	391	249	1	54	135	261	2e-26	55.42	78.31
Locus_17863_Transcript_1/1_Confidence_1.000	424	atha|NP_564055 | OG5_129594 | unknown protein [Arabidopsis thaliana]	282	137	9	35	78	121	1e-06	52.27	79.55
Locus_15533_Transcript_1/1_Confidence_1.000	325	atha|NP_564060 | OG5_130673 | zinc finger (C3HC4-type RING finger) family protein [Arabidopsis thaliana]	486	3	323	353	459	166	1e-12	37.04	55.56
Locus_820_Transcript_1/1_Confidence_1.000	1210	atha|NP_564118 | OG5_127079 | dolichyl-phosphate beta-D-mannosyltransferase, putative / dolichol-phosphate mannosyltransferase, putative / mannose-P-dolichol synthase, putative [Arabidopsis thaliana]	246	2	358	120	238	534	7e-63	83.19	93.28
Locus_4726_Transcript_1/1_Confidence_1.000	2622	atha|NP_564147 | OG5_156165 | unknown protein [Arabidopsis thaliana]	706	587	2620	33	665	1491	0	47.09	60.9
Locus_1550_Transcript_1/1_Confidence_1.000	900	atha|NP_564192 | OG5_127112 | GGT1 (GLUTAMATE:GLYOXYLATE AMINOTRANSFERASE); L-alanine:2-oxoglutarate aminotransferase/ glycine:2-oxoglutarate aminotransferase [Arabidopsis thaliana]	481	2	427	335	476	528	8e-61	73.24	85.21
Locus_24774_Transcript_1/1_Confidence_1.000	1559	atha|NP_564209 | OG5_178187 | NHL repeat-containing protein [Arabidopsis thaliana]	261	1250	708	26	209	346	6e-35	42.47	59.14
Locus_6044_Transcript_1/1_Confidence_1.000	1223	atha|NP_564222 | OG5_152177 | SET domain-containing protein [Arabidopsis thaliana]	476	60	1082	127	467	730	4e-89	47.55	65.13
Locus_5668_Transcript_1/1_Confidence_1.000	621	atha|NP_564225 | OG5_128663 | anthranilate synthase beta subunit, putative [Arabidopsis thaliana]	222	619	485	174	218	175	1e-13	71.11	82.22
Locus_3093_Transcript_1/1_Confidence_1.000	1462	atha|NP_564250 | OG5_128509 | peptidyl-prolyl cis-trans isomerase PPIC-type family protein [Arabidopsis thaliana]	142	399	716	37	142	534	2e-63	91.51	96.23
Locus_7333_Transcript_1/1_Confidence_1.000	2694	atha|NP_564272 | OG5_160351 | unknown protein [Arabidopsis thaliana]	575	1569	226	171	559	843	5e-99	40.67	57.56
Locus_31511_Transcript_1/1_Confidence_1.000	226	atha|NP_564288 | OG5_127787 | glycoside hydrolase family 47 protein [Arabidopsis thaliana]	574	226	2	119	194	286	2e-29	69.74	85.53
Locus_34983_Transcript_1/1_Confidence_1.000	271	atha|NP_564288 | OG5_127787 | glycoside hydrolase family 47 protein [Arabidopsis thaliana]	574	2	271	45	134	371	5e-41	74.44	90
Locus_35518_Transcript_1/1_Confidence_1.000	434	atha|NP_564296 | OG5_156606 | RNA helicase, putative [Arabidopsis thaliana]	700	142	432	1	97	280	3e-27	70.1	84.54
Locus_1147_Transcript_1/1_Confidence_1.000	2369	atha|NP_564337 | OG5_127272 | glycyl-tRNA synthetase / glycine--tRNA ligase [Arabidopsis thaliana]	729	246	2240	61	721	2382	0	67.82	80.15
Locus_10330_Transcript_1/1_Confidence_1.000	1437	atha|NP_564374 | no_group | unknown protein [Arabidopsis thaliana]	321	1273	431	15	292	159	5e-10	23.1	45.52
Locus_24392_Transcript_1/1_Confidence_1.000	669	atha|NP_564395 | OG5_130283 | AOX1D (alternative oxidase 1D); alternative oxidase [Arabidopsis thaliana]	318	456	668	67	136	187	7e-15	50.7	69.01
Locus_62011_Transcript_1/1_Confidence_1.000	255	atha|NP_564414 | OG5_132321 | SBT3.3; identical protein binding / serine-type endopeptidase [Arabidopsis thaliana]	777	252	1	174	261	234	9e-22	55.68	67.05
Locus_5243_Transcript_1/1_Confidence_1.000	924	atha|NP_564458 | OG5_164683 | dienelactone hydrolase family protein [Arabidopsis thaliana]	310	923	420	139	310	413	2e-45	51.74	62.79
Locus_6979_Transcript_1/1_Confidence_1.000	1042	atha|NP_564497 | OG5_126607 | RD21 (responsive to dehydration 21); cysteine-type endopeptidase/ cysteine-type peptidase [Arabidopsis thaliana]	462	748	5	34	282	789	6e-99	59.13	75.4
Locus_14255_Transcript_1/1_Confidence_1.000	1217	atha|NP_564518 | OG5_150325 | unknown protein [Arabidopsis thaliana]	315	1131	181	8	308	807	1e-102	53.94	63.09
Locus_47556_Transcript_1/1_Confidence_1.000	585	atha|NP_564518 | OG5_150325 | unknown protein [Arabidopsis thaliana]	315	281	580	26	125	198	2e-16	56	68
Locus_24789_Transcript_1/1_Confidence_1.000	1068	atha|NP_564521 | OG5_131211 | dolichol-phosphate mannosyltransferase-related [Arabidopsis thaliana]	89	752	486	1	86	238	1e-22	55.06	71.91
Locus_19219_Transcript_1/1_Confidence_1.000	975	atha|NP_564527 | OG5_164528 | unknown protein [Arabidopsis thaliana]	129	239	625	1	129	309	3e-32	51.15	67.94
Locus_11402_Transcript_1/1_Confidence_1.000	1597	atha|NP_564571 | OG5_126671 | THFS (10-FORMYLTETRAHYDROFOLATE SYNTHETASE); ATP binding / copper ion binding / formate-tetrahydrofolate ligase [Arabidopsis thaliana]	634	1597	8	27	556	2148	0	77.74	87.92
Locus_16611_Transcript_1/1_Confidence_1.000	1095	atha|NP_564580 | OG5_156612 | unknown protein [Arabidopsis thaliana]	175	438	818	48	174	511	7e-61	74.02	85.04
Locus_7515_Transcript_1/1_Confidence_1.000	2369	atha|NP_564590 | OG5_164685 | lipase class 3 family protein [Arabidopsis thaliana]	527	1648	350	91	508	1045	2e-130	48.77	63.76
Locus_16150_Transcript_1/1_Confidence_1.000	880	atha|NP_564590 | OG5_164685 | lipase class 3 family protein [Arabidopsis thaliana]	527	2	787	265	495	542	2e-62	43.87	60.22
Locus_8321_Transcript_1/1_Confidence_1.000	1131	atha|NP_564640 | OG5_127019 | MSRB1 (methionine sulfoxide reductase B 1); peptide-methionine-(S)-S-oxide reductase [Arabidopsis thaliana]	202	838	428	58	194	559	1e-67	70.07	83.21
Locus_48501_Transcript_1/1_Confidence_1.000	731	atha|NP_564655 | no_group | RNA binding [Arabidopsis thaliana]	245	599	730	20	61	135	8e-08	65.91	81.82
Locus_26646_Transcript_1/1_Confidence_1.000	291	atha|NP_564675 | no_group | UBQ12 (UBIQUITIN 12); protein binding [Arabidopsis thaliana]	230	75	290	63	134	300	1e-32	83.33	84.72
Locus_63403_Transcript_1/1_Confidence_1.000	387	atha|NP_564744 | OG5_144273 | ZCF125; ATP binding / microtubule motor [Arabidopsis thaliana]	823	179	6	1	54	137	2e-08	44.83	68.97
Locus_30683_Transcript_1/1_Confidence_1.000	558	atha|NP_564755 | OG5_128806 | radical SAM domain-containing protein [Arabidopsis thaliana]	458	557	294	363	450	296	1e-29	64.77	78.41
Locus_32070_Transcript_1/1_Confidence_1.000	554	atha|NP_564755 | OG5_128806 | radical SAM domain-containing protein [Arabidopsis thaliana]	458	1	552	181	362	743	1e-94	77.72	83.15
Locus_11337_Transcript_1/1_Confidence_1.000	383	atha|NP_564756 | OG5_128012 | DC1 domain-containing protein [Arabidopsis thaliana]	578	1	381	82	204	283	4e-28	43.31	66.93
Locus_13678_Transcript_1/1_Confidence_1.000	962	atha|NP_564761 | OG5_127872 | ATB2; oxidoreductase [Arabidopsis thaliana]	345	962	363	142	345	652	2e-80	60.29	75.98
Locus_42151_Transcript_1/1_Confidence_1.000	349	atha|NP_564794 | OG5_170812 | octicosapeptide/Phox/Bem1p (PB1) domain-containing protein / tetratricopeptide repeat (TPR)-containing protein [Arabidopsis thaliana]	751	110	274	291	345	187	4e-15	63.64	74.55
Locus_8178_Transcript_1/1_Confidence_1.000	1399	atha|NP_564806 | OG5_135813 | NRS/ER (NUCLEOTIDE-RHAMNOSE SYNTHASE/EPIMERASE-REDUCTASE); UDP-4-keto-6-deoxy-glucose-3,5-epimerase/ UDP-4-keto-rhamnose-4-keto-reductase/ dTDP-4-dehydrorhamnose 3,5-epimerase/ dTDP-4-dehydrorhamnose reductase [Arabidopsis thaliana]	301	1399	950	151	300	694	4e-85	87.33	95.33
Locus_6751_Transcript_1/1_Confidence_1.000	4901	atha|NP_564821 | OG5_127219 | ATRBOH F (ARABIDOPSIS THALIANA RESPIRATORY BURST OXIDASE PROTEIN F); NAD(P)H oxidase [Arabidopsis thaliana]	944	1328	4186	1	944	2533	0	52.95	65.03
Locus_3058_Transcript_1/1_Confidence_1.000	653	atha|NP_564831 | OG5_144890 | unknown protein [Arabidopsis thaliana]	199	3	140	129	174	213	9e-19	86.96	91.3
Locus_19037_Transcript_1/1_Confidence_1.000	780	atha|NP_564847 | OG5_132092 | unknown protein [Arabidopsis thaliana]	292	325	780	20	176	309	4e-31	45.22	61.15
Locus_8513_Transcript_1/1_Confidence_1.000	760	atha|NP_564848 | OG5_156613 | unknown protein [Arabidopsis thaliana]	115	142	381	35	115	172	1e-13	46.34	54.88
Locus_13105_Transcript_1/1_Confidence_1.000	1165	atha|NP_564874 | OG5_138761 | calmodulin-related protein, putative [Arabidopsis thaliana]	157	1125	880	71	151	184	3e-14	50	65.85
Locus_1805_Transcript_1/1_Confidence_1.000	1970	atha|NP_564894 | OG5_156615 | zinc finger (MYND type) family protein / F-box family protein [Arabidopsis thaliana]	379	3	1007	61	349	799	2e-97	52.07	65.98
Locus_61279_Transcript_1/1_Confidence_1.000	404	atha|NP_564896 | OG5_128667 | ASY1 (ASYNAPTIC 1); DNA binding [Arabidopsis thaliana]	596	194	3	2	64	210	5e-18	65.62	81.25
Locus_4750_Transcript_1/1_Confidence_1.000	4383	atha|NP_564904 | OG5_139529 | leucine-rich repeat family protein / protein kinase family protein [Arabidopsis thaliana]	929	550	3153	26	886	1877	0	45.07	62.97
Locus_12937_Transcript_1/1_Confidence_1.000	2130	atha|NP_564904 | OG5_139529 | leucine-rich repeat family protein / protein kinase family protein [Arabidopsis thaliana]	929	665	2110	26	520	660	6e-72	36.1	52.12
Locus_14400_Transcript_1/1_Confidence_1.000	564	atha|NP_564904 | OG5_139529 | leucine-rich repeat family protein / protein kinase family protein [Arabidopsis thaliana]	929	346	561	349	419	128	6e-07	40	61.33
Locus_16108_Transcript_1/1_Confidence_1.000	842	atha|NP_564904 | OG5_139529 | leucine-rich repeat family protein / protein kinase family protein [Arabidopsis thaliana]	929	8	769	75	320	281	1e-25	32.2	47.35
Locus_34666_Transcript_1/1_Confidence_1.000	586	atha|NP_564904 | OG5_139529 | leucine-rich repeat family protein / protein kinase family protein [Arabidopsis thaliana]	929	558	187	395	518	249	3e-22	41.6	59.2
Locus_41834_Transcript_1/1_Confidence_1.000	379	atha|NP_564904 | OG5_139529 | leucine-rich repeat family protein / protein kinase family protein [Arabidopsis thaliana]	929	1	369	399	520	284	7e-28	43.9	66.67
Locus_40501_Transcript_1/1_Confidence_1.000	720	atha|NP_564940 | OG5_127625 | EXS family protein / ERD1/XPR1/SYG1 family protein [Arabidopsis thaliana]	784	716	39	555	779	653	2e-77	50.44	69.47
Locus_1542_Transcript_1/1_Confidence_1.000	416	atha|NP_564946 | OG5_150388 | STN7 (Stt7 homolog STN7); kinase/ protein kinase [Arabidopsis thaliana]	562	5	415	373	509	434	5e-49	64.96	81.02
Locus_8351_Transcript_1/1_Confidence_1.000	453	atha|NP_564946 | OG5_150388 | STN7 (Stt7 homolog STN7); kinase/ protein kinase [Arabidopsis thaliana]	562	453	304	510	561	143	4e-09	59.62	73.08
Locus_1899_Transcript_1/1_Confidence_1.000	1844	atha|NP_564986 | OG5_126884 | ribosomal protein L12 family protein [Arabidopsis thaliana]	208	664	1140	47	208	266	4e-24	51.85	68.52
Locus_154_Transcript_1/1_Confidence_1.000	1140	atha|NP_565005 | OG5_147150 | unknown protein [Arabidopsis thaliana]	244	329	892	54	241	558	9e-67	56.38	76.06
Locus_15224_Transcript_1/1_Confidence_1.000	1840	atha|NP_565032 | OG5_131626 | deoxynucleoside kinase family [Arabidopsis thaliana]	580	1456	290	179	566	1333	6e-175	64.97	77.92
Locus_44914_Transcript_1/1_Confidence_1.000	374	atha|NP_565033 | OG5_131821 | TFIIIA (TRANSCRIPTION FACTOR IIIA); nucleic acid binding / zinc ion binding [Arabidopsis thaliana]	324	15	371	158	277	227	3e-21	36.67	57.5
Locus_22709_Transcript_1/1_Confidence_1.000	1166	atha|NP_565055 | OG5_190860 | unknown protein [Arabidopsis thaliana]	306	294	1058	54	305	478	5e-54	42.97	62.5
Locus_23090_Transcript_1/1_Confidence_1.000	1539	atha|NP_565056 | OG5_152431 | SUVH3 (SU(VAR)3-9 HOMOLOG 3); histone methyltransferase [Arabidopsis thaliana]	669	909	427	208	359	321	1e-29	45.96	62.73
Locus_20761_Transcript_1/1_Confidence_1.000	1089	atha|NP_565063 | OG5_132697 | unknown protein [Arabidopsis thaliana]	434	1089	691	61	178	201	2e-15	36.3	51.85
Locus_6853_Transcript_1/1_Confidence_1.000	1826	atha|NP_565064 | OG5_178222 | calmodulin-related [Arabidopsis thaliana]	254	1198	1476	162	254	177	2e-12	40.86	56.99
Locus_3234_Transcript_1/1_Confidence_1.000	1428	atha|NP_565107 | OG5_131509 | isoflavone reductase, putative [Arabidopsis thaliana]	310	416	1345	1	306	724	2e-89	47.02	65.52
Locus_6615_Transcript_1/1_Confidence_1.000	979	atha|NP_565194 | OG5_164346 | unknown protein [Arabidopsis thaliana]	164	696	977	10	103	286	1e-28	53.19	78.72
Locus_10997_Transcript_1/1_Confidence_0.667	238	atha|NP_565194 | OG5_164346 | unknown protein [Arabidopsis thaliana]	164	237	121	89	127	123	4e-08	64.1	76.92
Locus_42670_Transcript_1/1_Confidence_1.000	1233	atha|NP_565198 | OG5_130095 | DNA repair protein recA [Arabidopsis thaliana]	439	806	3	79	346	1259	6e-169	88.06	95.15
Locus_11209_Transcript_1/1_Confidence_1.000	1864	atha|NP_565252 | OG5_130464 | APG2 (ALBINO AND PALE GREEN 2); proton motive force dependent protein transmembrane transporter [Arabidopsis thaliana]	340	580	1512	36	336	1012	4e-130	68.79	79.3
Locus_2093_Transcript_1/1_Confidence_1.000	1995	atha|NP_565271 | OG5_132085 | PUX2 (PLANT UBX DOMAIN-CONTAINING PROTEIN 2); nucleic acid binding / zinc ion binding [Arabidopsis thaliana]	458	564	55	116	270	270	3e-23	32.94	52.94
Locus_21817_Transcript_1/1_Confidence_1.000	479	atha|NP_565277 | OG5_129304 | WOL (WOODEN LEG); cytokinin receptor/ osmosensor/ phosphoprotein phosphatase/ protein histidine kinase [Arabidopsis thaliana]	1057	3	440	458	604	223	3e-19	38.51	60.14
Locus_6856_Transcript_1/1_Confidence_1.000	1900	atha|NP_565298 | OG5_160365 | aspartyl protease family protein [Arabidopsis thaliana]	461	2	460	315	458	212	5e-16	36.31	54.14
Locus_53918_Transcript_1/1_Confidence_1.000	362	atha|NP_565298 | OG5_160365 | aspartyl protease family protein [Arabidopsis thaliana]	461	68	310	98	178	250	5e-24	50.62	71.6
Locus_39431_Transcript_1/1_Confidence_1.000	825	atha|NP_565299 | OG5_128468 | DNA-binding protein, putative [Arabidopsis thaliana]	639	58	825	1	257	829	7e-104	66.15	82.1
Locus_35062_Transcript_1/1_Confidence_1.000	647	atha|NP_565315 | OG5_130037 | GCN5-related N-acetyltransferase (GNAT) family protein [Arabidopsis thaliana]	218	2	376	55	180	357	2e-39	53.17	73.81
Locus_37766_Transcript_1/1_Confidence_1.000	969	atha|NP_565327 | OG5_147290 | PGR5 (proton gradient regulation 5); electron carrier [Arabidopsis thaliana]	133	579	800	60	133	337	3e-36	86.49	93.24
Locus_7858_Transcript_1/1_Confidence_1.000	1682	atha|NP_565328 | OG5_127477 | integral membrane family protein [Arabidopsis thaliana]	401	275	3	87	177	186	5e-13	37.36	62.64
Locus_47173_Transcript_1/1_Confidence_1.000	323	atha|NP_565337 | OG5_164702 | PLA2-ALPHA; phospholipase A2 [Arabidopsis thaliana]	148	314	159	38	89	187	1e-16	65.38	76.92
Locus_16548_Transcript_1/1_Confidence_1.000	1703	atha|NP_565364 | OG5_130215 | unknown protein [Arabidopsis thaliana]	158	507	902	7	141	362	3e-38	51.85	68.89
Locus_3178_Transcript_1/1_Confidence_1.000	1213	atha|NP_565389 | OG5_129297 | 3-oxo-5-alpha-steroid 4-dehydrogenase family protein / steroid 5-alpha-reductase family protein [Arabidopsis thaliana]	343	1196	303	46	342	526	2e-60	39.35	57.42
Locus_27281_Transcript_1/1_Confidence_1.000	521	atha|NP_565393 | OG5_129347 | shikimate kinase family protein [Arabidopsis thaliana]	189	217	501	5	99	309	3e-33	57.89	78.95
Locus_19868_Transcript_1/1_Confidence_1.000	1223	atha|NP_565410 | OG5_153402 | unknown protein [Arabidopsis thaliana]	140	640	512	58	100	194	1e-15	76.74	95.35
Locus_9761_Transcript_1/1_Confidence_1.000	1203	atha|NP_565419 | OG5_128843 | IRE1A; endoribonuclease/ kinase [Arabidopsis thaliana]	841	1198	1076	795	835	141	2e-07	56.1	78.05
Locus_8700_Transcript_1/1_Confidence_1.000	972	atha|NP_565424 | OG5_178240 | ATHK1 (histidine kinase 1); histidine phosphotransfer kinase/ osmosensor/ protein histidine kinase [Arabidopsis thaliana]	1207	48	971	165	485	162	2e-10	22.85	44.81
Locus_21170_Transcript_1/1_Confidence_1.000	583	atha|NP_565447 | OG5_138518 | SLP3; serine-type peptidase [Arabidopsis thaliana]	815	18	578	398	584	478	1e-53	52.13	67.02
Locus_30983_Transcript_1/1_Confidence_1.000	378	atha|NP_565456 | OG5_147254 | FVE; metal ion binding [Arabidopsis thaliana]	507	2	376	104	228	549	3e-66	80	92.8
Locus_32559_Transcript_1/1_Confidence_1.000	844	atha|NP_565471 | OG5_169965 | activating signal cointegrator-related [Arabidopsis thaliana]	339	395	3	10	140	497	7e-58	74.05	87.79
Locus_16842_Transcript_1/1_Confidence_1.000	891	atha|NP_565522 | OG5_190889 | SKIP6 (SKP1 interacting partner 6); ubiquitin-protein ligase [Arabidopsis thaliana]	372	810	7	19	292	418	9e-46	35.97	53.96
Locus_35061_Transcript_1/1_Confidence_1.000	1763	atha|NP_565552 | OG5_160367 | protein kinase family protein [Arabidopsis thaliana]	708	749	1603	339	624	475	4e-49	38.36	58.56
Locus_23910_Transcript_1/1_Confidence_1.000	509	atha|NP_565560 | OG5_131975 | ATCNGC6; calmodulin binding [Arabidopsis thaliana]	747	2	505	297	462	426	5e-47	49.7	65.68
Locus_17803_Transcript_1/1_Confidence_1.000	1038	atha|NP_565656 | OG5_139386 | aldo/keto reductase family protein [Arabidopsis thaliana]	384	526	2	18	189	570	3e-67	60	74.86
Locus_20627_Transcript_1/1_Confidence_1.000	1245	atha|NP_565701 | OG5_170781 | lipase class 3 family protein [Arabidopsis thaliana]	529	1243	650	326	505	418	2e-43	46.46	59.6
Locus_12996_Transcript_1/1_Confidence_1.000	374	atha|NP_565746 | OG5_170776 | unknown protein [Arabidopsis thaliana]	183	199	23	5	69	119	7e-07	40.91	53.03
Locus_18706_Transcript_1/1_Confidence_1.000	2511	atha|NP_565757 | OG5_132889 | ATZW10 [Arabidopsis thaliana]	742	71	2101	95	737	996	6e-120	33.58	54.64
Locus_40134_Transcript_1/1_Confidence_1.000	530	atha|NP_565778 | OG5_128892 | unknown protein [Arabidopsis thaliana]	248	351	530	40	101	131	1e-07	48.39	66.13
Locus_34999_Transcript_1/1_Confidence_1.000	329	atha|NP_565786 | OG5_130559 | LHB1B2; chlorophyll binding [Arabidopsis thaliana]	265	3	326	142	249	281	3e-29	59.26	71.3
Locus_4937_Transcript_1/1_Confidence_1.000	659	atha|NP_565836 | OG5_128257 | ubiquitin extension protein 2 (UBQ2) / 60S ribosomal protein L40 (RPL40A) [Arabidopsis thaliana]	128	477	659	1	61	315	3e-34	100	100
Locus_22353_Transcript_1/1_Confidence_1.000	313	atha|NP_565836 | OG5_128257 | ubiquitin extension protein 2 (UBQ2) / 60S ribosomal protein L40 (RPL40A) [Arabidopsis thaliana]	128	312	151	13	66	274	1e-29	98.15	100
Locus_21754_Transcript_1/1_Confidence_1.000	321	atha|NP_565845 | OG5_178250 | ubiquitin-protein ligase [Arabidopsis thaliana]	898	6	293	73	168	133	4e-08	33.33	51.04
Locus_5217_Transcript_1/1_Confidence_1.000	1060	atha|NP_565849 | no_group | unknown protein [Arabidopsis thaliana]	158	915	1058	88	135	213	2e-18	81.25	91.67
Locus_582_Transcript_1/1_Confidence_1.000	460	atha|NP_565854 | OG5_128822 | zinc finger (C2H2 type) family protein [Arabidopsis thaliana]	198	210	458	1	84	283	2e-29	68.24	78.82
Locus_24354_Transcript_1/1_Confidence_1.000	1031	atha|NP_565874 | OG5_190910 | emb1513 (embryo defective 1513); copper ion transmembrane transporter [Arabidopsis thaliana]	251	774	1031	50	132	226	1e-19	59.3	70.93
Locus_18065_Transcript_1/1_Confidence_1.000	715	atha|NP_565878 | OG5_128225 | ribosome biogenesis regulatory protein (RRS1) family protein [Arabidopsis thaliana]	318	2	352	181	297	315	4e-32	63.25	82.91
Locus_1107_Transcript_1/1_Confidence_1.000	3197	atha|NP_565882 | OG5_137951 | AUX1 (AUXIN RESISTANT 1); amino acid transmembrane transporter/ auxin binding / auxin influx transmembrane transporter/ transporter [Arabidopsis thaliana]	485	2390	1014	9	467	1797	0	72.77	82.79
Locus_11601_Transcript_1/1_Confidence_1.000	280	atha|NP_565897 | OG5_130214 | hydrophobic protein, putative / low temperature and salt responsive protein, putative [Arabidopsis thaliana]	54	5	82	29	54	118	1e-07	96.15	100
Locus_15863_Transcript_1/1_Confidence_1.000	504	atha|NP_565897 | OG5_130214 | hydrophobic protein, putative / low temperature and salt responsive protein, putative [Arabidopsis thaliana]	54	500	423	29	54	114	1e-06	92.31	96.15
Locus_26739_Transcript_1/1_Confidence_1.000	370	atha|NP_565897 | OG5_130214 | hydrophobic protein, putative / low temperature and salt responsive protein, putative [Arabidopsis thaliana]	54	369	292	28	53	115	5e-07	96.15	100
Locus_15119_Transcript_1/1_Confidence_1.000	653	atha|NP_565899 | OG5_150392 | hydroxyproline-rich glycoprotein family protein [Arabidopsis thaliana]	317	16	228	247	317	189	3e-15	46.48	67.61
Locus_2191_Transcript_1/1_Confidence_1.000	1155	atha|NP_565903 | OG5_127037 | hydrolase, alpha/beta fold family protein [Arabidopsis thaliana]	311	123	1	2	42	164	8e-11	63.41	78.05
Locus_3136_Transcript_1/1_Confidence_1.000	1256	atha|NP_565945 | OG5_153215 | unknown protein [Arabidopsis thaliana]	190	459	839	46	181	163	3e-11	34.04	42.55
Locus_3646_Transcript_1/1_Confidence_1.000	1747	atha|NP_565996 | OG5_147166 | MSS3 (multicopy suppressors of snf4 deficiency in yeast 3); calcium ion binding [Arabidopsis thaliana]	215	761	1222	62	212	317	2e-31	44.16	64.29
Locus_6295_Transcript_1/1_Confidence_1.000	1441	atha|NP_565996 | OG5_147166 | MSS3 (multicopy suppressors of snf4 deficiency in yeast 3); calcium ion binding [Arabidopsis thaliana]	215	428	6	69	206	254	6e-23	48.94	69.5
Locus_8845_Transcript_1/1_Confidence_1.000	1859	atha|NP_565996 | OG5_147166 | MSS3 (multicopy suppressors of snf4 deficiency in yeast 3); calcium ion binding [Arabidopsis thaliana]	215	1237	806	60	206	326	2e-32	46.26	68.03
Locus_25914_Transcript_1/1_Confidence_1.000	648	atha|NP_565996 | OG5_147166 | MSS3 (multicopy suppressors of snf4 deficiency in yeast 3); calcium ion binding [Arabidopsis thaliana]	215	23	472	61	208	331	1e-35	43.33	66.67
Locus_10827_Transcript_1/1_Confidence_1.000	875	atha|NP_566010 | OG5_156526 | ASHH3 (HISTONE-LYSINE N-METHYLTRANSFERASE ASHH3); histone-lysine N-methyltransferase [Arabidopsis thaliana]	363	2	511	208	362	238	5e-21	30.64	53.18
Locus_10392_Transcript_1/1_Confidence_1.000	1354	atha|NP_566014 | OG5_129367 | unknown protein [Arabidopsis thaliana]	493	1354	1163	108	169	174	2e-11	51.56	67.19
Locus_500_Transcript_1/1_Confidence_1.000	1809	atha|NP_566017 | OG5_133231 | protein N-terminal asparagine amidohydrolase family protein [Arabidopsis thaliana]	347	507	1349	66	344	586	3e-67	42.76	57.6
Locus_5534_Transcript_1/1_Confidence_1.000	1327	atha|NP_566030 | OG5_144213 | thylakoid lumenal 15 kDa protein, chloroplast [Arabidopsis thaliana]	224	546	995	75	224	529	6e-62	83.33	91.33
Locus_42328_Transcript_1/1_Confidence_1.000	433	atha|NP_566040 | OG5_131246 | ATRAD51C; ATP binding / damaged DNA binding / protein binding / recombinase/ single-stranded DNA binding [Arabidopsis thaliana]	363	418	146	55	140	228	5e-21	56.04	69.23
Locus_5665_Transcript_1/1_Confidence_1.000	2402	atha|NP_566048 | OG5_128508 | nucleotidyltransferase family protein [Arabidopsis thaliana]	764	1264	2259	425	756	1240	4e-156	64.76	81.33
Locus_14878_Transcript_1/1_Confidence_1.000	691	atha|NP_566077 | no_group | SDH4; succinate dehydrogenase (ubiquinone) [Arabidopsis thaliana]	151	310	441	101	144	129	1e-07	54.55	77.27
Locus_9011_Transcript_1/1_Confidence_1.000	2515	atha|NP_566082 | OG5_190923 | calcium-binding protein, putative [Arabidopsis thaliana]	135	1553	1879	10	118	286	4e-27	45.87	71.56
Locus_11809_Transcript_1/2_Confidence_1.000	1872	atha|NP_566105 | OG5_128658 | ATMHX (ARABIDOPSIS THALIANA MAGNESIUM/PROTON EXCHANGER); calcium:sodium antiporter/ cation:cation antiporter [Arabidopsis thaliana]	539	711	58	10	227	619	1e-69	53.21	72.48
Locus_11809_Transcript_2/2_Confidence_1.000	1872	atha|NP_566105 | OG5_128658 | ATMHX (ARABIDOPSIS THALIANA MAGNESIUM/PROTON EXCHANGER); calcium:sodium antiporter/ cation:cation antiporter [Arabidopsis thaliana]	539	711	58	10	227	619	1e-69	53.21	72.48
Locus_24002_Transcript_1/1_Confidence_1.000	384	atha|NP_566148 | OG5_147297 | unknown protein [Arabidopsis thaliana]	802	3	383	218	344	477	1e-54	62.99	80.31
Locus_26883_Transcript_1/1_Confidence_1.000	1103	atha|NP_566185 | OG5_131737 | zinc ion binding [Arabidopsis thaliana]	312	443	1102	1	235	309	4e-30	40	54.47
Locus_1026_Transcript_1/1_Confidence_1.000	1386	atha|NP_566191 | OG5_129999 | NADH-ubiquinone oxidoreductase-related [Arabidopsis thaliana]	110	1012	791	30	106	290	3e-29	67.53	79.22
Locus_3060_Transcript_1/1_Confidence_1.000	684	atha|NP_566204 | OG5_133460 | DegP7 (DegP protease 7); catalytic/ protein binding / serine-type endopeptidase/ serine-type peptidase [Arabidopsis thaliana]	1097	342	683	14	119	413	1e-43	72.81	80.7
Locus_7927_Transcript_1/1_Confidence_1.000	1837	atha|NP_566242 | OG5_153220 | unknown protein [Arabidopsis thaliana]	216	1375	848	28	207	451	1e-49	47.54	65.03
Locus_10512_Transcript_1/1_Confidence_1.000	357	atha|NP_566330 | OG5_160380 | unknown protein [Arabidopsis thaliana]	65	209	355	3	51	146	3e-11	55.1	65.31
Locus_22688_Transcript_1/1_Confidence_1.000	1469	atha|NP_566334 | OG5_130117 | D-alanine--D-alanine ligase family [Arabidopsis thaliana]	519	601	1467	69	358	753	8e-91	55.52	72.76
Locus_5309_Transcript_1/1_Confidence_1.000	2465	atha|NP_566345 | OG5_190939 | unknown protein [Arabidopsis thaliana]	402	1497	397	25	383	565	3e-62	40.48	56.88
Locus_575_Transcript_1/1_Confidence_1.000	921	atha|NP_566426 | OG5_133977 | ATHCHIB (ARABIDOPSIS THALIANA BASIC CHITINASE); chitinase [Arabidopsis thaliana]	322	450	1	73	241	428	1e-47	53.22	66.67
Locus_1749_Transcript_1/1_Confidence_1.000	497	atha|NP_566426 | OG5_133977 | ATHCHIB (ARABIDOPSIS THALIANA BASIC CHITINASE); chitinase [Arabidopsis thaliana]	322	184	495	20	126	129	2e-07	43.24	51.35
Locus_9155_Transcript_1/1_Confidence_1.000	377	atha|NP_566426 | OG5_133977 | ATHCHIB (ARABIDOPSIS THALIANA BASIC CHITINASE); chitinase [Arabidopsis thaliana]	322	377	15	192	313	380	5e-43	57.38	68.85
Locus_52458_Transcript_1/1_Confidence_1.000	1304	atha|NP_566436 | OG5_128458 | unknown protein [Arabidopsis thaliana]	250	785	57	12	242	264	3e-24	30.65	50.4
Locus_20412_Transcript_1/1_Confidence_1.000	570	atha|NP_566451 | OG5_128104 | ubiquitin family protein [Arabidopsis thaliana]	414	3	566	215	388	542	4e-65	56.38	70.74
Locus_33799_Transcript_1/1_Confidence_1.000	993	atha|NP_566516 | OG5_139572 | unknown protein [Arabidopsis thaliana]	175	703	993	6	99	220	2e-19	44.33	62.89
Locus_20766_Transcript_1/1_Confidence_1.000	1024	atha|NP_566527 | OG5_160221 | phosphatidic acid phosphatase-related / PAP2-related [Arabidopsis thaliana]	301	753	226	105	280	577	2e-69	65.34	76.7
Locus_35378_Transcript_1/1_Confidence_1.000	639	atha|NP_566537 | OG5_129266 | acyl-activating enzyme 13 (AAE13) [Arabidopsis thaliana]	544	80	637	1	181	290	3e-28	37.23	54.26
Locus_6503_Transcript_1/1_Confidence_1.000	2019	atha|NP_566540 | OG5_136225 | unknown protein [Arabidopsis thaliana]	690	965	3	1	315	663	4e-74	45.57	59.94
Locus_23192_Transcript_1/1_Confidence_1.000	251	atha|NP_566540 | OG5_136225 | unknown protein [Arabidopsis thaliana]	690	44	244	315	380	144	7e-10	47.76	64.18
Locus_14834_Transcript_1/1_Confidence_1.000	661	atha|NP_566565 | OG5_160385 | peroxidase, putative [Arabidopsis thaliana]	339	660	265	204	339	272	4e-26	42.34	62.77
Locus_26680_Transcript_1/1_Confidence_1.000	1291	atha|NP_566619 | OG5_190951 | unknown protein [Arabidopsis thaliana]	197	1168	1287	15	54	133	3e-07	70	82.5
Locus_21439_Transcript_1/1_Confidence_1.000	2962	atha|NP_566626 | OG5_176462 | unknown protein [Arabidopsis thaliana]	446	1965	904	100	442	660	3e-74	40.9	58.82
Locus_57116_Transcript_1/1_Confidence_1.000	356	atha|NP_566633 | OG5_126607 | cysteine proteinase, putative / thiol protease, putative [Arabidopsis thaliana]	452	3	356	84	200	377	8e-42	61.02	72.03
Locus_16504_Transcript_1/1_Confidence_1.000	649	atha|NP_566638 | OG5_140462 | ATNHD1; potassium:hydrogen antiporter/ sodium:hydrogen antiporter [Arabidopsis thaliana]	576	179	607	397	539	501	2e-57	79.72	92.31
Locus_8019_Transcript_1/1_Confidence_1.000	1272	atha|NP_566651 | OG5_134908 | zinc finger (C3HC4-type RING finger) family protein [Arabidopsis thaliana]	340	385	1122	81	333	485	2e-54	46.92	64.23
Locus_48155_Transcript_1/1_Confidence_1.000	1184	atha|NP_566663 | OG5_133993 | tetraacyldisaccharide 4-kinase family protein [Arabidopsis thaliana]	395	376	2	58	175	320	5e-31	52	66.4
Locus_26731_Transcript_1/1_Confidence_1.000	277	atha|NP_566665 | OG5_190955 | plastocyanin-like domain-containing protein [Arabidopsis thaliana]	203	208	8	16	76	113	3e-06	37.31	53.73
Locus_23311_Transcript_1/1_Confidence_1.000	2200	atha|NP_566669 | OG5_127397 | metal transporter family protein [Arabidopsis thaliana]	276	1308	2042	32	276	901	3e-113	69.39	82.45
Locus_28794_Transcript_1/1_Confidence_1.000	743	atha|NP_566681 | OG5_190957 | dentin sialophosphoprotein-related [Arabidopsis thaliana]	1192	708	142	979	1191	225	1e-18	29.44	50.47
Locus_20040_Transcript_1/1_Confidence_1.000	652	atha|NP_566685 | OG5_156086 | oxidoreductase, 2OG-Fe(II) oxygenase family protein [Arabidopsis thaliana]	364	3	242	282	362	180	1e-13	40.74	64.2
Locus_19143_Transcript_1/1_Confidence_1.000	588	atha|NP_566715 | OG5_128779 | HMT3; homocysteine S-methyltransferase [Arabidopsis thaliana]	347	4	141	292	337	174	4e-13	60.87	82.61
Locus_6408_Transcript_1/1_Confidence_1.000	700	atha|NP_566732 | OG5_129624 | dienelactone hydrolase family protein [Arabidopsis thaliana]	239	402	1	1	132	255	3e-24	42.65	54.41
Locus_1288_Transcript_1/1_Confidence_1.000	725	atha|NP_566777 | OG5_153243 | AOC3 (ALLENE OXIDE CYCLASE 3); allene-oxide cyclase [Arabidopsis thaliana]	258	316	2	29	139	169	2e-12	36.94	56.76
Locus_27322_Transcript_1/1_Confidence_1.000	1127	atha|NP_566779 | OG5_140469 | unknown protein [Arabidopsis thaliana]	335	6	440	199	335	382	4e-40	51.03	68.28
Locus_13567_Transcript_1/1_Confidence_1.000	1135	atha|NP_566798 | OG5_129031 | short-chain dehydrogenase/reductase (SDR) family protein [Arabidopsis thaliana]	306	478	1131	38	256	393	7e-42	42.73	62.73
Locus_12129_Transcript_1/1_Confidence_1.000	2951	atha|NP_566806 | OG5_129625 | YSL6 (YELLOW STRIPE LIKE 6); oligopeptide transporter [Arabidopsis thaliana]	676	1944	1	5	656	2324	0	68.1	81.13
Locus_13702_Transcript_1/1_Confidence_1.000	1327	atha|NP_566815 | OG5_131086 | PUX1 (PLANT UBX DOMAIN-CONTAINING PROTEIN 1) [Arabidopsis thaliana]	251	29	667	39	250	398	1e-42	47.95	65.3
Locus_30456_Transcript_1/1_Confidence_1.000	654	atha|NP_566823 | no_group | LBD25 (LOB DOMAIN-CONTAINING PROTEIN 25) [Arabidopsis thaliana]	159	61	348	42	139	224	1e-20	47.96	63.27
Locus_5017_Transcript_1/1_Confidence_1.000	462	atha|NP_566844 | OG5_131373 | unknown protein [Arabidopsis thaliana]	121	120	458	3	109	142	5e-10	56.52	64.35
Locus_6960_Transcript_1/1_Confidence_1.000	1785	atha|NP_566846 | OG5_132042 | CM1 (CHORISMATE MUTASE 1); L-ascorbate peroxidase/ chorismate mutase [Arabidopsis thaliana]	340	596	1345	81	340	857	3e-107	59.62	75.38
Locus_7873_Transcript_1/1_Confidence_1.000	1204	atha|NP_566858 | OG5_178302 | unknown protein [Arabidopsis thaliana]	249	552	1124	58	249	506	1e-58	51.3	66.84
Locus_12405_Transcript_1/1_Confidence_1.000	298	atha|NP_566960 | OG5_159983 | SEX4 (STARCH-EXCESS 4); polysaccharide binding / protein tyrosine/serine/threonine phosphatase [Arabidopsis thaliana]	379	3	284	166	259	333	3e-36	60.64	77.66
Locus_4317_Transcript_1/1_Confidence_1.000	2927	atha|NP_567014 | OG5_144769 | RabGAP/TBC domain-containing protein [Arabidopsis thaliana]	777	2428	5	16	741	1601	0	46.61	58.6
Locus_11691_Transcript_1/1_Confidence_1.000	843	atha|NP_567017 | OG5_127470 | HEXO1 (BETA-HEXOSAMINIDASE 1); beta-N-acetylhexosaminidase/ hexosaminidase/ hydrolase, hydrolyzing O-glycosyl compounds [Arabidopsis thaliana]	541	474	842	32	158	245	2e-21	45.67	62.2
Locus_4173_Transcript_1/1_Confidence_1.000	1857	atha|NP_567024 | OG5_149467 | unknown protein [Arabidopsis thaliana]	240	1491	757	2	240	344	1e-34	38.49	56.75
Locus_7115_Transcript_1/1_Confidence_1.000	1085	atha|NP_567055 | OG5_156645 | glycoside hydrolase family 28 protein / polygalacturonase (pectinase) family protein [Arabidopsis thaliana]	490	1	753	214	468	794	4e-99	58.59	73.05
Locus_650_Transcript_1/1_Confidence_1.000	1773	atha|NP_567064 | OG5_133347 | ATRBL15 (ARABIDOPSIS RHOMBOID-LIKE PROTEIN 15) [Arabidopsis thaliana]	403	522	1772	4	401	826	6e-102	44.76	63.81
Locus_20161_Transcript_2/2_Confidence_1.000	254	atha|NP_567069 | OG5_190984 | F-box family protein-related [Arabidopsis thaliana]	353	1	237	159	237	229	5e-22	53.16	78.48
Locus_16615_Transcript_1/1_Confidence_1.000	256	atha|NP_567074 | OG5_178314 | ankyrin protein kinase, putative [Arabidopsis thaliana]	471	247	8	293	373	203	6e-18	50.62	70.37
Locus_21695_Transcript_1/1_Confidence_1.000	1353	atha|NP_567076 | OG5_164737 | magnesium transporter CorA-like family protein [Arabidopsis thaliana]	436	667	1314	56	250	570	2e-65	54.17	70.83
Locus_5630_Transcript_1/1_Confidence_1.000	949	atha|NP_567079 | OG5_128219 | epsin N-terminal homology (ENTH) domain-containing protein [Arabidopsis thaliana]	1024	139	468	791	902	215	5e-17	44.17	60.83
Locus_4284_Transcript_1/1_Confidence_1.000	1289	atha|NP_567086 | OG5_213170 | unknown protein [Arabidopsis thaliana]	97	856	608	15	97	195	4e-16	45.78	62.65
Locus_18912_Transcript_1/1_Confidence_1.000	1318	atha|NP_567144 | OG5_190986 | unknown protein [Arabidopsis thaliana]	396	148	1215	44	394	810	2e-101	44.75	62.98
Locus_24605_Transcript_1/1_Confidence_1.000	1313	atha|NP_567165 | OG5_127655 | mechanosensitive ion channel domain-containing protein / MS ion channel domain-containing protein [Arabidopsis thaliana]	497	658	1311	107	332	434	1e-45	42.17	61.3
Locus_341_Transcript_1/1_Confidence_1.000	838	atha|NP_567182 | OG5_127118 | ADF8 (ACTIN DEPOLYMERIZING FACTOR 8); actin binding [Arabidopsis thaliana]	140	568	837	1	90	387	5e-44	72.22	88.89
Locus_39123_Transcript_1/1_Confidence_1.000	336	atha|NP_567215 | OG5_127800 | cathepsin B-like cysteine protease, putative [Arabidopsis thaliana]	359	273	1	46	133	166	9e-13	38.04	57.61
Locus_123_Transcript_1/1_Confidence_1.000	285	atha|NP_567258 | OG5_133899 | ATTPC1 (TWO-PORE CHANNEL 1); calcium channel/ voltage-gated calcium channel [Arabidopsis thaliana]	733	1	276	622	716	219	1e-19	56.84	73.68
Locus_316_Transcript_1/1_Confidence_1.000	1865	atha|NP_567265 | OG5_127077 | ATPC1; enzyme regulator [Arabidopsis thaliana]	373	1426	464	51	371	1271	1e-168	79.75	94.08
Locus_22423_Transcript_1/1_Confidence_1.000	1367	atha|NP_567336 | OG5_164738 | unknown protein [Arabidopsis thaliana]	126	181	2	33	102	215	2e-18	58.57	70
Locus_7019_Transcript_1/1_Confidence_1.000	431	atha|NP_567344 | OG5_126706 | 14-3-3-like protein GF14 chi / general regulatory factor 1 (GRF1) [Arabidopsis thaliana]	267	381	4	75	203	464	9e-56	65.12	79.84
Locus_5717_Transcript_1/1_Confidence_1.000	5635	atha|NP_567348 | OG5_130096 | EMB1691 (EMBRYO DEFECTIVE 1691); S-adenosylmethionine-dependent methyltransferase/ methyltransferase/ nucleic acid binding [Arabidopsis thaliana]	963	1654	755	566	865	1280	3e-150	75.08	87.38
Locus_18451_Transcript_1/1_Confidence_1.000	1731	atha|NP_567366 | OG5_127038 | nodulin MtN3 family protein [Arabidopsis thaliana]	258	406	1029	23	234	442	7e-48	42.92	61.79
Locus_2288_Transcript_1/1_Confidence_1.000	1494	atha|NP_567420 | OG5_156641 | transferase, transferring glycosyl groups [Arabidopsis thaliana]	206	393	968	10	202	456	5e-51	43.3	62.89
Locus_33453_Transcript_1/1_Confidence_1.000	744	atha|NP_567435 | OG5_153415 | unknown protein [Arabidopsis thaliana]	493	394	675	60	153	240	4e-21	47.87	69.15
Locus_9948_Transcript_1/1_Confidence_1.000	1456	atha|NP_567451 | OG5_132425 | AtMAPR4 (Arabidopsis thaliana membrane-associated progesterone binding protein 4); heme binding	245	1281	595	12	244	619	1e-74	51.69	69.49
Locus_31977_Transcript_1/1_Confidence_1.000	535	atha|NP_567490 | OG5_128243 | NRPB9B; DNA binding / DNA-directed RNA polymerase/ nucleic acid binding / transcription regulator/ zinc ion binding [Arabidopsis thaliana]	114	3	311	11	112	189	2e-16	36.79	57.55
Locus_24728_Transcript_1/1_Confidence_1.000	783	atha|NP_567498 | OG5_160395 | unknown protein [Arabidopsis thaliana]	178	134	574	30	173	172	3e-13	38.78	57.14
Locus_6684_Transcript_1/1_Confidence_1.000	269	atha|NP_567521 | OG5_134854 | ATP-dependent Clp protease proteolytic subunit, putative [Arabidopsis thaliana]	305	3	260	219	305	334	5e-37	68.97	91.95
Locus_23270_Transcript_1/1_Confidence_1.000	437	atha|NP_567528 | OG5_127824 | unknown protein [Arabidopsis thaliana]	224	1	363	61	181	444	2e-53	61.16	80.99
Locus_987_Transcript_1/1_Confidence_1.000	2540	atha|NP_567530 | OG5_150360 | ATERF-1 (ETHYLENE RESPONSIVE ELEMENT BINDING FACTOR 1); DNA binding / transcription activator/ transcription factor [Arabidopsis thaliana]	268	1222	704	71	208	269	1e-23	44.13	54.75
Locus_30180_Transcript_1/1_Confidence_1.000	509	atha|NP_567541 | OG5_128091 | unknown protein [Arabidopsis thaliana]	264	2	235	185	262	192	4e-16	48.72	69.23
Locus_62560_Transcript_1/1_Confidence_1.000	850	atha|NP_567541 | OG5_128091 | unknown protein [Arabidopsis thaliana]	264	2	235	185	262	197	5e-16	52.56	67.95
Locus_10181_Transcript_1/1_Confidence_1.000	2338	atha|NP_567581 | OG5_134156 | CYP707A1; (+)-abscisic acid 8-hydroxylase/ oxygen binding [Arabidopsis thaliana]	467	1850	615	28	437	761	1e-89	35.35	58.11
Locus_22888_Transcript_1/1_Confidence_1.000	1177	atha|NP_567581 | OG5_134156 | CYP707A1; (+)-abscisic acid 8-hydroxylase/ oxygen binding [Arabidopsis thaliana]	467	932	18	29	326	523	5e-59	37.01	58.44
Locus_24732_Transcript_1/1_Confidence_1.000	1223	atha|NP_567582 | OG5_178332 | EMB3006 (embryo defective 3006) [Arabidopsis thaliana]	180	366	584	18	90	122	5e-06	32.88	53.42
Locus_9783_Transcript_1/1_Confidence_1.000	872	atha|NP_567584 | OG5_178333 | actin binding [Arabidopsis thaliana]	148	396	833	2	147	178	5e-14	29.45	53.42
Locus_30262_Transcript_1/1_Confidence_1.000	503	atha|NP_567658 | OG5_139498 | IM (IMMUTANS); alternative oxidase [Arabidopsis thaliana]	351	1	228	267	344	239	3e-22	57.83	69.88
Locus_155_Transcript_1/1_Confidence_1.000	538	atha|NP_567663 | OG5_129249 | AtHip1 (Arabidopsis thaliana Hsp70-interacting protein 1); binding	441	538	395	391	438	203	7e-17	79.17	87.5
Locus_13296_Transcript_1/1_Confidence_1.000	820	atha|NP_567663 | OG5_129249 | AtHip1 (Arabidopsis thaliana Hsp70-interacting protein 1); binding	441	590	3	1	184	456	6e-51	48.98	67.35
Locus_26128_Transcript_1/1_Confidence_1.000	376	atha|NP_567670 | OG5_146454 | SMO1-2 (STEROL C4-METHYL OXIDASE 1-2); 4,4-dimethyl-9beta,19-cyclopropylsterol-4alpha-methyl oxidase/ C-4 methylsterol oxidase/ catalytic [Arabidopsis thaliana]	299	376	122	213	299	311	4e-33	65.52	83.91
Locus_10903_Transcript_1/1_Confidence_1.000	3085	atha|NP_567730 | OG5_139348 | AAA-type ATPase family protein [Arabidopsis thaliana]	506	759	2090	1	451	1054	2e-129	47.4	64.72
Locus_8373_Transcript_1/1_Confidence_1.000	506	atha|NP_567736 | OG5_131725 | PSD3 (phosphatidylserine decarboxylase 3); phosphatidylserine decarboxylase [Arabidopsis thaliana]	635	6	506	382	548	649	4e-79	66.47	81.44
Locus_6813_Transcript_1/1_Confidence_1.000	1629	atha|NP_567751 | OG5_138672 | sucrase-related [Arabidopsis thaliana]	443	2	772	155	421	575	4e-65	42.09	61.15
Locus_19395_Transcript_1/1_Confidence_1.000	993	atha|NP_567766 | OG5_137080 | COBL11 (COBRA-LIKE PROTEIN 11 PRECURSOR) [Arabidopsis thaliana]	668	88	993	45	343	577	6e-66	39.41	56.35
Locus_6669_Transcript_1/1_Confidence_1.000	1617	atha|NP_567797 | OG5_191018 | unknown protein [Arabidopsis thaliana]	304	1419	739	42	276	474	3e-52	44.73	59.07
Locus_33744_Transcript_1/1_Confidence_1.000	1267	atha|NP_567804 | OG5_170355 | unknown protein [Arabidopsis thaliana]	202	3	344	37	117	164	3e-11	35.96	49.12
Locus_1195_Transcript_1/1_Confidence_1.000	3765	atha|NP_567820 | OG5_139038 | emb2726 (embryo defective 2726); RNA binding / translation elongation factor [Arabidopsis thaliana]	953	652	2	510	722	796	4e-87	67.74	84.33
Locus_8135_Transcript_1/1_Confidence_1.000	2420	atha|NP_567837 | OG5_159711 | unknown protein [Arabidopsis thaliana]	291	1031	1510	148	291	299	2e-27	40.23	51.15
Locus_5568_Transcript_1/1_Confidence_1.000	1153	atha|NP_567848 | OG5_145016 | unknown protein [Arabidopsis thaliana]	173	408	809	1	134	417	8e-47	54.48	73.13
Locus_12526_Transcript_1/1_Confidence_1.000	2241	atha|NP_567849 | no_group | F-box family protein (FBL19) [Arabidopsis thaliana]	301	1520	711	1	281	464	6e-50	37.94	56.74
Locus_14704_Transcript_1/1_Confidence_1.000	1255	atha|NP_567859 | OG5_164747 | SDG4 (SET DOMAIN GROUP 4); histone methyltransferase [Arabidopsis thaliana]	497	9	821	219	484	755	2e-92	57.35	71.32
Locus_2026_Transcript_1/1_Confidence_1.000	1794	atha|NP_567861 | OG5_127445 | NFD1 (NUCLEAR FUSION DEFECTIVE 1); RNA binding / structural constituent of ribosome [Arabidopsis thaliana]	270	597	1028	105	249	293	3e-27	65.52	75.86
Locus_23226_Transcript_1/1_Confidence_1.000	1033	atha|NP_567866 | OG5_127515 | lipoyltransferase (LIP2p) [Arabidopsis thaliana]	278	64	789	43	267	768	3e-98	58.26	74.38
Locus_20396_Transcript_1/1_Confidence_1.000	951	atha|NP_567881 | OG5_128259 | calcineurin-like phosphoesterase family protein [Arabidopsis thaliana]	418	2	730	95	337	795	7e-101	59.02	74.59
Locus_41449_Transcript_1/1_Confidence_1.000	626	atha|NP_567888 | OG5_149582 | phox (PX) domain-containing protein [Arabidopsis thaliana]	723	361	555	1	65	307	6e-30	69.23	84.62
Locus_14363_Transcript_1/1_Confidence_1.000	357	atha|NP_567935 | OG5_191026 | unknown protein [Arabidopsis thaliana]	203	354	163	116	179	149	5e-11	45.31	68.75
Locus_1334_Transcript_1/1_Confidence_1.000	352	atha|NP_567938 | OG5_127205 | 40S ribosomal protein S29 (RPS29C) [Arabidopsis thaliana]	56	95	3	1	31	144	4e-11	83.87	90.32
Locus_14759_Transcript_1/1_Confidence_1.000	696	atha|NP_567992 | OG5_132961 | unknown protein [Arabidopsis thaliana]	77	552	373	8	69	176	1e-14	53.23	75.81
Locus_3399_Transcript_1/1_Confidence_1.000	957	atha|NP_568014 | OG5_126721 | MAP1D (METHIONINE AMINOPEPTIDASE 1D); aminopeptidase/ metalloexopeptidase [Arabidopsis thaliana]	350	180	956	44	302	1000	1e-132	71.04	82.63
Locus_3949_Transcript_1/1_Confidence_1.000	856	atha|NP_568043 | OG5_191030 | unknown protein [Arabidopsis thaliana]	153	41	310	64	153	131	2e-07	37.78	62.22
Locus_10180_Transcript_1/1_Confidence_1.000	1253	atha|NP_568066 | OG5_129817 | unknown protein [Arabidopsis thaliana]	650	281	1249	329	648	537	2e-59	43.34	62.23
Locus_6334_Transcript_1/1_Confidence_1.000	589	atha|NP_568095 | OG5_136596 | unknown protein [Arabidopsis thaliana]	174	282	1	75	170	155	3e-11	32.29	55.21
Locus_6480_Transcript_1/1_Confidence_1.000	405	atha|NP_568095 | OG5_136596 | unknown protein [Arabidopsis thaliana]	174	270	4	7	93	136	3e-09	43.82	58.43
Locus_34185_Transcript_1/1_Confidence_1.000	388	atha|NP_568095 | OG5_136596 | unknown protein [Arabidopsis thaliana]	174	374	72	42	141	158	4e-12	39.22	54.9
Locus_41074_Transcript_1/1_Confidence_1.000	320	atha|NP_568095 | OG5_136596 | unknown protein [Arabidopsis thaliana]	174	39	296	12	103	179	2e-15	39.13	54.35
Locus_14669_Transcript_1/1_Confidence_1.000	1502	atha|NP_568117 | OG5_128350 | phosphoadenosine phosphosulfate (PAPS) reductase family protein [Arabidopsis thaliana]	497	3	1043	190	496	803	2e-98	48.13	65.13
Locus_21512_Transcript_1/1_Confidence_1.000	1352	atha|NP_568117 | OG5_128350 | phosphoadenosine phosphosulfate (PAPS) reductase family protein [Arabidopsis thaliana]	497	772	1350	1	188	637	2e-74	62.18	75.13
Locus_17939_Transcript_1/1_Confidence_1.000	803	atha|NP_568123 | OG5_133310 | nucleobase:cation symporter [Arabidopsis thaliana]	241	803	486	144	241	275	1e-26	54.72	66.04
Locus_11942_Transcript_1/1_Confidence_1.000	649	atha|NP_568128 | OG5_141694 | electron carrier [Arabidopsis thaliana]	339	242	3	71	149	209	8e-18	50	68.75
Locus_40547_Transcript_1/1_Confidence_1.000	526	atha|NP_568139 | OG5_178352 | spermidine synthase-related / putrescine aminopropyltransferase-related [Arabidopsis thaliana]	434	524	3	127	258	179	1e-13	30.46	41.95
Locus_9795_Transcript_1/1_Confidence_1.000	1005	atha|NP_568172 | OG5_160012 | WCRKC1 (WCRKC THIOREDOXIN 1) [Arabidopsis thaliana]	210	573	193	84	208	394	2e-43	55.12	77.17
Locus_28327_Transcript_1/1_Confidence_1.000	1522	atha|NP_568209 | OG5_128261 | 2-oxoisovalerate dehydrogenase, putative / 3-methyl-2-oxobutanoate dehydrogenase, putative / branched-chain alpha-keto acid dehydrogenase E1 alpha subunit, putative [Arabidopsis thaliana]	472	634	5	76	285	790	1e-96	66.19	81.43
Locus_7564_Transcript_1/1_Confidence_1.000	1507	atha|NP_568218 | OG5_176681 | transcription elongation factor-related [Arabidopsis thaliana]	353	768	145	3	201	251	1e-21	31.73	54.33
Locus_32132_Transcript_1/1_Confidence_1.000	447	atha|NP_568220 | OG5_128375 | RNA recognition motif (RRM)-containing protein [Arabidopsis thaliana]	527	249	416	158	213	185	1e-14	60.71	78.57
Locus_9826_Transcript_1/1_Confidence_1.000	1407	atha|NP_568247 | OG5_191044 | unknown protein [Arabidopsis thaliana]	209	904	332	11	182	184	1e-13	23.62	43.72
Locus_19379_Transcript_1/1_Confidence_1.000	1726	atha|NP_568265 | OG5_129798 | ankyrin repeat family protein [Arabidopsis thaliana]	144	993	589	10	144	360	5e-38	47.41	73.33
Locus_3385_Transcript_1/1_Confidence_1.000	2452	atha|NP_568283 | OG5_136471 | DiT1 (dicarboxylate transporter 1); oxoglutarate:malate antiporter [Arabidopsis thaliana]	557	1794	379	86	557	1895	0	87.29	93.01
Locus_3059_Transcript_1/1_Confidence_1.000	2165	atha|NP_568316 | OG5_131515 | BCCP2 (BIOTIN CARBOXYL CARRIER PROTEIN 2); biotin binding [Arabidopsis thaliana]	255	906	1430	86	255	446	5e-48	55.68	71.02
Locus_5601_Transcript_1/1_Confidence_1.000	291	atha|NP_568359 | OG5_128133 | DRT101 (DNA-DAMAGE-REPAIR/TOLERATION 101); intramolecular transferase, phosphotransferases / magnesium ion binding [Arabidopsis thaliana]	556	8	265	185	273	214	4e-19	53.93	66.29
Locus_224_Transcript_1/1_Confidence_1.000	1362	atha|NP_568375 | OG5_127390 | elongation factor 1B alpha-subunit 2 (eEF1Balpha2) [Arabidopsis thaliana]	224	763	1023	138	224	397	1e-42	86.21	90.8
Locus_3892_Transcript_1/1_Confidence_1.000	616	atha|NP_568380 | OG5_126840 | STT3A (STAUROSPORIN AND TEMPERATURE SENSITIVE 3-LIKE A); oligosaccharyl transferase [Arabidopsis thaliana]	779	614	516	733	766	138	4e-08	70.59	88.24
Locus_4626_Transcript_1/1_Confidence_1.000	1131	atha|NP_568386 | OG5_128981 | integral membrane family protein [Arabidopsis thaliana]	288	1131	415	50	288	579	2e-69	59	74.9
Locus_21965_Transcript_1/1_Confidence_1.000	260	atha|NP_568428 | OG5_127289 | PYRD (pyrimidine d); dihydroorotate dehydrogenase [Arabidopsis thaliana]	460	2	259	187	271	328	2e-35	75.58	87.21
Locus_8760_Transcript_1/1_Confidence_1.000	2341	atha|NP_568438 | OG5_213241 | protein kinase family protein [Arabidopsis thaliana]	470	1	321	314	420	191	3e-13	35.51	55.14
Locus_51096_Transcript_1/1_Confidence_1.000	346	atha|NP_568438 | OG5_213241 | protein kinase family protein [Arabidopsis thaliana]	470	346	26	314	420	186	3e-15	34.58	55.14
Locus_14578_Transcript_1/1_Confidence_1.000	1968	atha|NP_568474 | OG5_130762 | DNMT2 (DNA METHYLTRANSFERASE-2); DNA binding [Arabidopsis thaliana]	383	1635	526	96	383	607	8e-96	41.78	52.02
Locus_11514_Transcript_1/1_Confidence_1.000	1177	atha|NP_568487 | OG5_164274 | unknown protein [Arabidopsis thaliana]	335	4	288	237	332	214	3e-17	51.55	71.13
Locus_20911_Transcript_1/1_Confidence_1.000	731	atha|NP_568497 | OG5_145026 | unknown protein [Arabidopsis thaliana]	341	731	165	157	338	571	2e-69	57.37	75.26
Locus_3062_Transcript_1/1_Confidence_1.000	2227	atha|NP_568530 | OG5_132559 | EXS family protein / ERD1/XPR1/SYG1 family protein [Arabidopsis thaliana]	457	1550	399	76	451	1106	5e-141	54.43	71.09
Locus_24474_Transcript_1/1_Confidence_1.000	631	atha|NP_568535 | OG5_128045 | unknown protein [Arabidopsis thaliana]	293	11	298	198	293	431	1e-49	84.38	91.67
Locus_73388_Transcript_1/1_Confidence_1.000	563	atha|NP_568579 | OG5_211590 | nodulin MtN3 family protein [Arabidopsis thaliana]	239	344	541	1	67	186	3e-15	51.47	72.06
Locus_23428_Transcript_1/1_Confidence_1.000	2715	atha|NP_568585 | OG5_164759 | unknown protein [Arabidopsis thaliana]	741	2378	321	15	733	1450	0	46.05	62.26
Locus_640_Transcript_1/1_Confidence_1.000	712	atha|NP_568601 | OG5_160417 | unknown protein [Arabidopsis thaliana]	164	489	680	70	133	302	1e-31	82.81	90.62
Locus_20569_Transcript_1/1_Confidence_1.000	610	atha|NP_568620 | OG5_126607 | cysteine proteinase, putative / thiol protease, putative [Arabidopsis thaliana]	463	608	57	171	354	736	3e-93	73.37	85.87
Locus_53788_Transcript_1/1_Confidence_1.000	346	atha|NP_568620 | OG5_126607 | cysteine proteinase, putative / thiol protease, putative [Arabidopsis thaliana]	463	2	346	203	317	355	1e-38	52.17	74.78
Locus_59879_Transcript_1/1_Confidence_1.000	522	atha|NP_568620 | OG5_126607 | cysteine proteinase, putative / thiol protease, putative [Arabidopsis thaliana]	463	123	521	152	284	414	4e-46	70.68	81.2
Locus_12685_Transcript_1/1_Confidence_1.000	1448	atha|NP_568633 | OG5_138687 | haloacid dehalogenase-like hydrolase family protein [Arabidopsis thaliana]	1107	789	4	1	262	1170	2e-146	77.86	90.84
Locus_24778_Transcript_1/1_Confidence_1.000	975	atha|NP_568633 | OG5_138687 | haloacid dehalogenase-like hydrolase family protein [Arabidopsis thaliana]	1107	973	2	368	691	1127	1e-142	62.65	80.86
Locus_29953_Transcript_1/1_Confidence_1.000	343	atha|NP_568640 | OG5_141695 | cytochrome c6 (ATC6) [Arabidopsis thaliana]	175	16	318	72	172	377	2e-44	65.35	79.21
Locus_2090_Transcript_1/1_Confidence_1.000	695	atha|NP_568647 | OG5_158945 | unknown protein [Arabidopsis thaliana]	173	694	524	117	173	176	6e-14	57.89	73.68
Locus_13731_Transcript_2/2_Confidence_1.000	263	atha|NP_568652 | OG5_128264 | APG7 (AUTOPHAGY 7); APG8 activating enzyme [Arabidopsis thaliana]	697	1	261	145	231	197	8e-17	41.38	58.62
Locus_20505_Transcript_1/1_Confidence_1.000	605	atha|NP_568652 | OG5_128264 | APG7 (AUTOPHAGY 7); APG8 activating enzyme [Arabidopsis thaliana]	697	27	605	301	493	650	4e-78	70.1	78.35
Locus_34059_Transcript_1/1_Confidence_1.000	607	atha|NP_568652 | OG5_128264 | APG7 (AUTOPHAGY 7); APG8 activating enzyme [Arabidopsis thaliana]	697	335	9	10	115	325	1e-32	55.45	70
Locus_23179_Transcript_1/1_Confidence_1.000	2794	atha|NP_568690 | OG5_126952 | GFA2 (GAMETOPHYTIC FACTOR 2); heat shock protein binding / unfolded protein binding [Arabidopsis thaliana]	456	2329	1019	8	448	924	5e-112	48.2	61.94
Locus_49321_Transcript_1/1_Confidence_1.000	505	atha|NP_568722 | OG5_126607 | cysteine proteinase, putative [Arabidopsis thaliana]	361	3	149	298	346	184	1e-14	63.27	75.51
Locus_41786_Transcript_1/1_Confidence_1.000	747	atha|NP_568752 | OG5_130319 | methyltransferase [Arabidopsis thaliana]	318	210	716	60	201	275	2e-26	40.83	55.62
Locus_20932_Transcript_1/1_Confidence_1.000	584	atha|NP_568762 | OG5_129434 | PBS2 (PPHB SUSCEPTIBLE 2); protein binding / zinc ion binding [Arabidopsis thaliana]	226	188	3	3	64	241	1e-22	67.74	80.65
Locus_17118_Transcript_1/1_Confidence_1.000	250	atha|NP_568772 | OG5_127191 | FIB1 (FIBRILLARIN 1); snoRNA binding [Arabidopsis thaliana]	308	250	122	265	307	193	3e-17	83.72	93.02
Locus_12935_Transcript_1/1_Confidence_1.000	477	atha|NP_568820 | OG5_131983 | SWAP (Suppressor-of-White-APricot)/surp domain-containing protein [Arabidopsis thaliana]	844	271	11	2	84	178	2e-13	52.87	64.37
Locus_9234_Transcript_1/1_Confidence_1.000	1270	atha|NP_568825 | OG5_170907 | XYLT (ARABIDOPSIS THALIANA BETA-1,2-XYLOSYLTRANSFERASE); xylosyltransferase [Arabidopsis thaliana]	534	642	7	8	230	326	3e-31	35.17	53.81
Locus_6150_Transcript_1/1_Confidence_1.000	1820	atha|NP_568836 | OG5_178379 | ATARP8 (ACTIN-RELATED PROTEIN 8); structural constituent of cytoskeleton [Arabidopsis thaliana]	471	1819	1127	239	465	694	2e-81	58.87	75.76
Locus_20646_Transcript_1/1_Confidence_1.000	365	atha|NP_568851 | OG5_130132 | ATLIG4; DNA ligase (ATP)/ protein binding [Arabidopsis thaliana]	1219	1	363	443	564	366	8e-39	64.75	82.79
Locus_21378_Transcript_1/1_Confidence_1.000	1085	atha|NP_568851 | OG5_130132 | ATLIG4; DNA ligase (ATP)/ protein binding [Arabidopsis thaliana]	1219	6	1082	97	457	1294	1e-165	65.65	83.1
Locus_33375_Transcript_1/1_Confidence_1.000	855	atha|NP_568851 | OG5_130132 | ATLIG4; DNA ligase (ATP)/ protein binding [Arabidopsis thaliana]	1219	854	63	550	810	738	4e-87	49.62	69.32
Locus_10511_Transcript_1/1_Confidence_1.000	1204	atha|NP_568855 | OG5_150244 | ZTL (ZEITLUPE); protein binding / ubiquitin-protein ligase [Arabidopsis thaliana]	609	1074	1202	39	81	200	7e-15	76.74	93.02
Locus_58022_Transcript_1/1_Confidence_1.000	576	atha|NP_568869 | OG5_178382 | unknown protein [Arabidopsis thaliana]	385	5	361	244	361	142	7e-09	30.65	50
Locus_5814_Transcript_1/1_Confidence_1.000	1101	atha|NP_568870 | OG5_191075 | SKIP1 (SKP1 INTERACTING PARTNER 1); protein binding [Arabidopsis thaliana]	300	3	518	89	267	228	2e-19	33.15	50.28
Locus_26758_Transcript_1/1_Confidence_1.000	913	atha|NP_568872 | OG5_128010 | 26S proteasome regulatory subunit, putative [Arabidopsis thaliana]	227	908	534	100	225	282	2e-27	46.46	64.57
Locus_72022_Transcript_1/1_Confidence_1.000	255	atha|NP_568904 | OG5_135466 | LTP4 (LIPID TRANSFER PROTEIN 4); lipid binding [Arabidopsis thaliana]	112	14	250	6	82	185	6e-17	46.84	69.62
Locus_64192_Transcript_1/1_Confidence_1.000	412	atha|NP_568905 | OG5_135466 | LTP3 (LIPID TRANSFER PROTEIN 3); lipid binding [Arabidopsis thaliana]	115	372	58	11	115	336	1e-38	60.95	76.19
Locus_20536_Transcript_1/1_Confidence_1.000	1490	atha|NP_568922 | OG5_129260 | PDX2 (PYRIDOXINE BIOSYNTHESIS 2); glutaminase/ glutaminyl-tRNA synthase (glutamine-hydrolyzing)/ protein heterodimerization [Arabidopsis thaliana]	255	900	157	1	255	701	2e-86	59.22	71.76
Locus_37266_Transcript_1/1_Confidence_1.000	271	atha|NP_568931 | OG5_127784 | DEAD/DEAH box helicase, putative (RH10) [Arabidopsis thaliana]	456	2	223	273	346	332	6e-36	85.14	91.89
Locus_15821_Transcript_1/1_Confidence_1.000	1203	atha|NP_568934 | OG5_128240 | ATG3 [Arabidopsis thaliana]	313	3	287	218	312	449	1e-49	87.37	93.68
Locus_21498_Transcript_1/1_Confidence_1.000	483	atha|NP_568934 | OG5_128240 | ATG3 [Arabidopsis thaliana]	313	481	2	78	232	446	2e-52	65	77.5
Locus_13351_Transcript_1/1_Confidence_1.000	663	atha|NP_568935 | OG5_175176 | small G protein family protein / RhoGAP family protein [Arabidopsis thaliana]	376	484	8	1	133	230	2e-20	40.74	54.94
Locus_40140_Transcript_1/1_Confidence_1.000	300	atha|NP_568976 | OG5_128605 | SPT42 (SPT4 HOMOLOG 2); positive transcription elongation factor/ zinc ion binding [Arabidopsis thaliana]	116	162	299	1	45	187	5e-17	76.09	82.61
Locus_21036_Transcript_1/1_Confidence_1.000	735	atha|NP_568990 | OG5_128392 | FAS2 (FASCIATA 2); nucleotide binding / protein binding [Arabidopsis thaliana]	397	735	10	32	256	659	1e-81	53.31	69.01
Locus_19510_Transcript_1/1_Confidence_1.000	1696	atha|NP_568996 | OG5_132423 | LIP1 (Light Insensitive Period1); GTPase [Arabidopsis thaliana]	342	1436	525	20	312	774	2e-95	55.45	67.95
Locus_32845_Transcript_1/1_Confidence_1.000	1173	atha|NP_569008 | OG5_126778 | short-chain dehydrogenase/reductase (SDR) family protein [Arabidopsis thaliana]	285	902	642	71	162	100	2e-06	35.87	48.91
Locus_3278_Transcript_1/1_Confidence_1.000	1860	atha|NP_569013 | OG5_127067 | peptidase M3 family protein / thimet oligopeptidase family protein [Arabidopsis thaliana]	791	3	1859	114	732	2412	0	75.28	88.53
Locus_1134_Transcript_1/1_Confidence_1.000	627	atha|NP_569032 | OG5_127110 | ATFOLT1 (ARABIDOPSIS THALIANA FOLATE TRANSPORTER 1); binding / folic acid transporter [Arabidopsis thaliana]	308	382	2	3	130	421	5e-48	69.53	82.81
Locus_17214_Transcript_1/3_Confidence_0.714	283	atha|NP_671784 | OG5_160424 | GCN5-related N-acetyltransferase (GNAT) family protein [Arabidopsis thaliana]	288	282	1	106	190	232	2e-22	53.19	65.96
Locus_17214_Transcript_3/3_Confidence_0.714	355	atha|NP_671784 | OG5_160424 | GCN5-related N-acetyltransferase (GNAT) family protein [Arabidopsis thaliana]	288	354	1	106	190	207	1e-18	43.22	54.24
Locus_25227_Transcript_1/1_Confidence_1.000	572	atha|NP_671784 | OG5_160424 | GCN5-related N-acetyltransferase (GNAT) family protein [Arabidopsis thaliana]	288	49	258	206	275	163	7e-12	41.43	72.86
[truncated: 18,074 more rows]
